# Supplementary material for: Synthetic protein-conductive membrane nanopores built with DNA
Source: Nat Commun. 2019 Nov 4;10:5018. doi: 10.1038/s41467-019-12639-y (PMC6828756; doi:10.1038/s41467-019-12639-y)
Supplement: Supplementary file 3 — Supplementary Data 1 [file 41467_2019_12639_MOESM3_ESM.xlsx]

## Sheet: Sheet1
	Supplementary Dataset Table 1. Sequences of DNA staple, adaptor, and cholesterol-modified anchor oligonucleotides. All DNA sequences are from the 5' to the 3' terminus. The names of staple and adaptor oligonucleotides indicate their position within the 2D DNA map of the pore (Figure S2) described as helix and base pair coordinate for the strands’ 3' terminus. The name of two cholesterol-modified …
Name	Sequence
	Staple strands
47[136]	GGAACAAATCATATATCCCACAAGCTTACCGAAGCTTGATTTCGGTCG
71[156]	AAATGTTACAAAATCGCGCAAAA
35[125]	TAACACCACCAGAGCCACC
44[190]	GAAGGGTTAGAACCTTATACTTCTGAATAA
45[115]	CATTAAGTAAGCATGAGCGCTCCCTGAACTCTGG
0[102]	CCAAGCGTTGAGCCAAGGTGAATGTCA
33[109]	GTGCATTAATTAGCTCGAATTCGTAATC
52[111]	AAAATTCGAACCAATACTCCCGACAAAGCACTC
62[135]	ACGGCCAGTAGCTGTTTCCTGTGTGAAATTGTTAT
65[149]	CTCAAGTGTAAGAATCATAACCGAGTAAAAGAACG
22[90]	TAAGAAGAAAATCTACAAAGCCGGAGACAGTCAAATCAC
4[94]	GGCTCCATTAATTGTCGAAC
34[164]	TATTTCAGAGCGGATGGTTGCTTTGACGAACGCT
32[122]	GGCTGAATTTAGCCTTGAGT
44[106]	AAAGTTACCAGATAAAAGAGGACTAAAGCGATTATA
48[156]	TGAGTCAGAAGGAGCGGAATTATCATCATATATAATCAGC
57[131]	CGCACTTCCAAGAAGATAAGTGTATAGCCGGATTAGGA
31[125]	AACAACATGTTCAAGAGAACGGAATAGG
25[133]	GATAATTTGCCTTGCTAAAGCGAATAAT
0[82]	AACTAGCAACGGCTACAGAGTC
10[118]	AACAGTGAGACTCCTCAGCTAATGCAGATAAGGCT
56[166]	AGAACCCCCAGTCACACCAATCAATCCT
70[130]	AGAACGTGGACATCAAGTTTTCAATTATTGCTCCTGCT
13[128]	ACCGGAACCAGTAGCGTAATT
31[112]	ATTTAACAAGCTGGCGAACTGTTGGGAAGGGCCGG
20[94]	AGAACTGATAAAGCTAAAGGGTGAGA
2[170]	AACCATCGCCCCACTACGACTTATTACACCAGCGC
43[141]	TTTATTTCGCAATCAATAGGAGGGAGGGCACC
27[113]	ATCGAGAAGATGGGCGGAACAAACGGCGGATTGAC
10[83]	TATTTCGGATAATCTTGACAATTATAT
62[114]	TGCGGGTTTTCCCAGTCACATTACGCCACGCC
12[167]	CCACCCTCAAGACAAAGAGTC
24[122]	CAAATAAGAAAATCGTAAAAAACAAGAGAATC
25[157]	CTAAAGCATCACAATATCTGGTCAGTTGCACTAACGCAGCCTTTACAG
19[141]	GAACGTAGAAATTAAACGGGAATACACT
52[193]	CCACGCTGAGAAAGGAATTG
28[175]	ATGTAGAAACGACCAGAATACCTACATTTTGATTA
1[120]	CATGAGGATGCAGGGACGAGG
66[132]	AACGCGCGGGGAGGCAACAGCCTACCTTTGTCGC
26[114]	AACGGAACGCCGCCAGCTTT
56[185]	CATTCTGGCCTCTTTAAT
20[111]	GATAGCCGATCAGCTTCCGCTT
35[157]	CGCAGAGCCACGCCACCCTCAGAACCGACCAA
13[141]	CCCTCATAGGTAAATGCTGAACAATCGGCC
52[143]	AACCTCAACCACCAGCGTATTCTATATTTTCACCT
32[90]	TGCCTCATTAAATGCCCCCTGCC
19[125]	AAATTAAGAAATGACCCTGTAATA
41[115]	GTAGCGGAAATTAACGGAATAGACCCCCAGACTTTTT
64[164]	AGCCGGAAGCATAGTTAGAATTAGTTAATCCAAT
57[108]	GACAGCCGGAAACCAGGCAAAGCGC
39[125]	GCAATATTGACTCAACATGTTTTAAATATGCA
53[164]	GGCGGTCAGTATTAACACCGGCGCGAA
31[88]	GAATCGTCGACTGGATAAACATGATAGTAC
4[146]	CTAGTCAAAAACGTCTTTCCCCTCAATCCTTGCTG
7[57]	ATGAACGGTGTACAGACTTTGA
37[133]	AATTCAATATAAAATCGG
1[155]	AATGCACGCATAAAGAACTGGAAATAGCATATTTCAAAAA
22[122]	ACAAATATCAGTAATGCCGATTCAACCGTTCTAGC
30[138]	CGACGGCTGGTAATATCCAGAACAATACGCTCAATAAT
54[110]	CATCAACTCTCCGTGGCATCGTAACCGTGCATCTGC
14[162]	TGATAGCGATAAATTACCTTAGCCCGAAGTGTTGTTCCAGTTTCACT
46[120]	TGAGTAATGAATATGATGAGAGGGTA
2[135]	CTGAGGCTAGTTTCCAATACATACTTGTCACAAAT
9[104]	AGAGGCTGCCCGTATATCAGCCAT
45[133]	CTTTTGCGGGAAATAAAGATAACG
8[89]	CGCCACCCTCAGAACAGGCGCATAGGTTCATCAAGAGACCTATTATT
53[96]	CATTTTTTCATTAAATAAAGGAATGAGAT
4[114]	TTGCAATCCAAAATAAACAGAAGATTGATTTTGTT
54[167]	CTAAAACACGCGCCCAAATCAGAT
42[190]	GAGACCCAATTCTGCAGTACCTTTTACATC
61[91]	CGATTAAGTTGGGAATCCCCCTGACCATAAATCA
47[108]	CATCTGTAGGTAAGGGTAAT
0[170]	CACCAACCTAAGAAACGTC
32[170]	ATGAGCAATACAGTGTTTTTATAATCACACAATTCACG
50[132]	CGGTACGATTTTTGAGAATTATCTTAAACAGCCC
12[110]	CCAGCATTGGAAAGCCGTAAAATCAGGTCTTGCCCGCTTGGGCGCCAGGG
38[178]	AATTTCATTTGGCTTAGATGAAA
37[109]	TTCCGGTCCACTTCACCAGT
10[164]	CAGGAGTGTACTGGTAATAAGGGTTTTGCTCTGT
8[107]	ACTCTAGACGCGCCTGTTTACTTCTGGTGTATCGG
15[141]	ATTTACATAAATTTCCCTTCAACCGCCTGGC
68[171]	GCGACCACACCCGCCGCGCTCTACAGGG
24[106]	ATTTTGCGGGACTCATAGTCCACCACCCCGT
37[89]	AAATATCTAGCGCGTTCACCGACCGAAA
29[155]	ATCCCATAATCGGCCGTAACAATAGAAGGCCCAG
16[170]	AGACAAAAGGGAAAATTAAAATAC
64[133]	GCCTAATGAGTGAGGTCGTGCCGGTTTGAATTATA
24[98]	TTAGACGTTAGCAAAAAAAA
60[167]	GAGTAGAAACCGTTGTCGTTATACAAAAAGCCATA
13[109]	CACCGGCAAAAAGATTAAG
17[125]	ATTATAAAGGTACATCCAATAAATTGCGTAGA
15[69]	TGCTCATTCAGTGAATAAGTTTCATCGGCATTTTCGGTCACAACG
48[193]	TAAATCCTTTTTATCAGA
6[129]	AGCATTCCACATGGGATTAGTTA
18[148]	GCAAATACCCAAACCGATATAACCGATAGAACAA
67[113]	GAGACGGAGGCGGTTAGGTTGGGATACCGACGCAG
48[110]	GCTATTTCCTGAGAGAAAGTCAGATTTA
49[139]	TAATATTAGACGGTGTTTAACAAGGAATTCAACTTTC
12[82]	CAGACGATTGGCCTTGCATTA
0[134]	AAAACACCACCAGTAGAAGGTAAAAAGAAGATTATTCAT
6[94]	GATCTAATCTTTCCAGGAATACCGAAAGATTCCGG
59[91]	CATTCGCCATTCAAATGTTTAATAAATATAACAGTTAAGCCAGAATGAC
50[183]	TAAAATATCTTTAGGAGGCAAATCAACAGTTG
71[87]	GGGCGATGGTTTTGCGGATG
4[162]	GAATAGAAAGGTTGCGCCGAAAACAGGTAAGCCCAGTT
18[90]	TGGTGGCATCATAAAGCCTCAG
40[190]	AACGGATTCGCCTGAAACAGTTGATTAACA
37[149]	CCTTATCAAAATCAGAGCCCACCCTCAG
69[135]	CAAAATCCCTTATAAATGGCGCTGGAGAAT
52[183]	AGCCAGCAGCAAATGAAAAATCTACAATTTTATACCAACG
43[157]	CAGTTGCACGTAAAACAGAGAAGCCTTATAGC
50[143]	CCGTCAATATATCAAACAGAGCCTTAGTTGCTACT
29[165]	AATTTACGAGCAGTACCGAAGCCATTGACTTGCCT
31[157]	CAGAAAGTAATTCAGTACCAGGCG
59[108]	GCGCAAAGGGGGATGTGCTGCAAGG
13[62]	CAAATTAGCCCCCTTATTAGCGTTTGCAGGT
55[150]	AGACAATATTTTTGAATG
39[100]	GGATGAGGTCATCCCACTACGTGA
20[130]	TTTCGCAATAAAATCATACAGGCAAGGCAAAGAATAAA
50[91]	TTGAGGCTATCAGGTCATTGTTGAGAGAATCTA
29[88]	TTGCCAGACGAGAGGCACCGCCACATAGTAAGTAA
68[158]	GCGCTAGCAAAAGAATTTTTAATAAGAAAACCGAC
26[100]	GAGGCCCTCAGAGTAGCGTAAC
41[147]	GTACGAACCGATTAAAATTCAAGGCAAAAGTAAAATACGT
46[156]	ATTTTTAGAACCCGAAACCACAACATTATCATTTTGCAGA
23[157]	ATAAACTAATAGATTTAGAAGTATTAGTTTTAAAAATAATAAG
30[146]	CCAAGAAAAATCGTCTGAAATGGAAGCCAGCTTTCGAT
33[131]	AGAATAATTTAATAGCTGCATTAATGGTGCTTTC
19[93]	CTTATGCGAAATTAAGCAAATTCTACTA
48[175]	GTTATTAAACTTTACAAACAATTC
34[138]	CTAAAACACCGAGCCTGGGGT
36[178]	GACGCTGAGAAGAACGCGACGCGT
29[101]	TAAAGGAGGTTAAGTATTA
49[133]	GATTGATAAATAGAGATAATTTAAATGCAATGCC
70[170]	TTGGATAGCCGGCGAACGTGAAGGGAA
42[132]	GGTCAATAACCTGTTTAGCTATAGCATTAGGCAA
67[157]	GCGAGTGAATTTGAAAACAAACCATCGCAAGG
11[116]	TCTCTTAATTGAGAATCTTGTAACGCCACTGCAGGTCGACTCTAGAGGA
23[109]	TCCAAAATCTCTAAATGAA
12[99]	AGGAAAGCGGATTGCATCTTTGCGTATTTCCAGTC
3[64]	TTGTGTCGAAATCCGCAAAGACAGCATATAAAGCCTGCGG
36[162]	AATCGTAACCAAAGGAGCGG
58[124]	CACCGTCAACAATACGGGTATCAGGGATAAGGCG
63[121]	ATGGTCATGCCAAGCGGCGTTAAAGTAG
2[92]	ACCCTCAGCAGCGGACAGCCTAAAGG
71[108]	ACCATCACCCAATCCAACGTACCTTTAAAATAA
67[96]	TTTTTCTTGCTGGTTTGCC
43[105]	ATAGTAGTATTTTCAAAGACACCTTCATTAATTTG
8[164]	GATAAGTGCCGTCGAGAGGGTCCCATGTACTGTC
57[91]	CAGTTTGAGGGGACAAAATAGGGGGG
16[155]	ATTCGTGTCTGGTTTGACCATTAGATACTCAGGTTTTTA
44[167]	AAAATTATATGAATATACAGTAACGAACGAGTCAA
46[190]	GATGGCAATTCATCAATTCCTGAGCCCGAAC
1[72]	AACGAGGGGGAGATTTGTATCATCAAAGC
18[114]	CATAAGGAAACGTTAAAGGGCTTTCGATCACG
42[167]	AGATTTAGAAGTTTCATTCC
11[133]	CCAACCAGAACCTATATGTCTGAGAGATGATTGCC
40[162]	CAACGGAACCCTAAAGGGAGCCCCCGAGACGGGGA
54[122]	GTAATCAAAAATAATTCGCAATTGTAAATCAA
0[90]	CAACGAGTAGTAAATTGCATTTGGGGCAATTGCTG
8[118]	TGTATCACTCATTTTTAAACCAAGTACCAACCGAC
50[193]	GAAGGTTATCGACAACTCGT
6[140]	ACAACAATAGGAATGATATAACCTGAACAGACGA
68[131]	CCTGAGAGAGTTTGGTTCCGTGTGAGTGCCTGA
15[108]	GGAATGCAGCTTCAAAGCGAGCAGGCGAGAAAAACCGTCTATCA
4[126]	AATTTTTGGTGAATTACTGA
5[112]	TTTTCTGTAGACAGCCGGTTTTGATAGCG
15[157]	CCGAACGAAAGTATGGTTTGCAGTATGAACGT
55[132]	CGTAGTCTGGCCGCCGTTTTAGAACGCGGCAAGCCCGCCTGT
63[155]	CCGCTGTGAGGCCATTACTAGAAATTCTTGCTTTTGATGATA
41[172]	ATATTTGCTTTGTTACATTTAAGGG
21[101]	CGTAAGATTCAAAATCGGTTGTACCAATAGCA
71[128]	TTTTGGGGTCGAGGTGCCGTAAAGGGAACAAGCAAACATCGGAAA
5[144]	AACAGTTTCAGTACAAATTTTGCACTTATCCGAGA
57[119]	CCTCAGGAAGTTGGTGTACAAGCAATTCCT
59[163]	CCGCCCAAAAGGTTAATAAGAGAATATAAATCAT
20[146]	TATAATTGAGTGAAGCGCACATTTGAGGATTAGAG
46[167]	CTGGGATACGCAAATTGTTTGGATACCATATCAGA
60[185]	TAATAACATCCAACAGGAAA
56[154]	ACCATCATTACTCGCCATTAAACAGAGGTGA
22[172]	AGAGAATAACATAACAATGACAAACAATGCATGATTA
61[140]	TCTGTCCATCACGCAAATTAGAACTCAACGAGC
37[125]	TATACAGAATCAGCAAAATTCATCTTTAGTTT
41[104]	AATATAATTTTGATAATAGAGAGTCAAAGGGCAAATCCTGT
62[185]	AATCCTGAGATTCTTTGATT
34[148]	ATCTTCATACATGACCAGTATGGCATTTTACTATC
67[136]	CTTCAGTGTAGCGGTCGCACGTATATGCAAATTTC
34[178]	AACTTTTTCAATGTTTAGTACAAACATCACACGGAACGGTACGCC
60[145]	GGCCTTGGCCTCTTCGCTGACGTTGTCGCTCAACATA
66[170]	ACTGAGCTAAACAGGAGGCGATTTTAG
53[147]	AGATAAAAAATACCGAACGAAATGATACGTGGCAC
63[91]	TCCCCGGGTACCGGCGTTGCGCTC
38[114]	CCTTTAGAGCCAAGTTTGCCTTTAGCGAAAAT
28[146]	TTTTCGTAGGATGAAAGCGTAAGAGGATAGGTCACGAT
27[93]	CAGTGAGCGAGAATCAGCT
28[140]	TATCATCCTTATTTACATTGGCAGATTCATTCTG
54[176]	CTGATAGCCGCTATTAGAACAGAGAT
65[111]	GGGAAACCTCTAACTCAATAAATAATTGCA
50[98]	ACCCATCAGTTTAATAAAAATCGGTTTAACATTTTA
6[162]	AGTTTCGTCACCAGCGGAGCTAACGAGTGAAA
13[96]	TCATAATCTCAGACTGGCGTTTTAATTCG
26[122]	TTTAGCCTTAAACGTTAATTATAAGCAAATATTTAGAA
41[141]	ACTGAGGCGAATGATGAAAAGTCCACTATTAA
6[64]	AAGAGGACAGGCGCAGACGGTCAATTACTTAGCCGGAACGA
12[142]	AGCCGCCGTAAGCGTCTGAC
55[88]	TAACAACCCGTCGGATATTAAATGACGACGATTAC
5[80]	AACTGTCGAGTTTCGACAG
49[117]	AGCACTAGCATGTCAATCAAAAAACAGGCCAT
58[185]	CGCTCATGGATAATAAAAGG
59[131]	CGGTGCAATAAACATGTAATTGGGTCAGTCCGTT
16[90]	CCGTAGAGCTTGCGAGCTGAAA
9[137]	TTAGCGGTTTTAACGTAGGCAGAAAAGCCAAAAAG
69[113]	TTGATGGGCAGCAAGTGTAAATCTTAAC
38[146]	CAGACCATTAGATAGCAGCACCGTAATCGCCT
25[91]	CGCCATTTTGTTATAATCAGAAAAGCCCCTATGT
2[105]	TTGCGGGATCGGCTTTGAAACGGGCTTGAGA
36[114]	CTCCGGAACCAGAGCCGCCG
	Adaptor strands
33[64]	CTCCGTCTATCTTTTTGTTCAGAAAACGAGAATCAAA
39[64]	CTCCGTCTATCTTTTTTTTCAAACTCCAACAGTATCA
25[64]	CTCCGTCTATCTTATGACTGACCAACCCGCCA
27[64]	CTCCGTCTATCTTCATAACCCTCGTTTAC
31[64]	CTCCGTCTATCTTTTTATACTGCG
17[64]	CTCCGTCTATCAGAAACACCAGAAAGTAC
19[64]	CTCCGTCTATCTTAATCATTGTGAATTAC
29[64]	CTCCGTCTATCTTTTTAAGAAGTT
37[64]	CTCCGTCTATCTTTTTTTTGACTTC
35[64]	CTCCGTCTATCTTTTTTTTATAGTCAGAAGCAGGTTGAGGCCATCTTT
23[64]	CTCCGTCTATCTTTATCTCCATGTCATAAGGG
21[64]	CTCCGTCTATCGTCAGGACGTTGGCGGAACAACATTTGCTACGTCAGC
65[93]	ACTTACCCTGACTATTTTTTTTTTGCTACGTCAGC
4[82]	CTGTACAGGTAACATTCAACTATTGCTACGTCAGC
43[85]	AGGTTTAATTTCAACTGCTACGTCAGC
45[85]	AGCGCTCATTATACCAGCTACGTCAGC
41[85]	GCTGCTTGCCCTGACGGCTACGTCAGC
9[85]	CTGAGCGTCCATTTTTGCTACGTCAGC
7[80]	CCCTCAGATTTTGCAATTTTTGCTACGTCAGC
11[71]	TCACAAACAAATAAATCTTTAAACATTTTTGCTACGTCAGC
25[83]	ATACAAGCAACACTATTTGCTACGTCAGC
67[93]	TGGAGGAAGCCCGAAATTTTTTTTGCTACGTCAGC
69[93]	CCAACCAGACCGGAAGTTTTTTTTGCTACGTCAGC
	Anchor strands
Cholesterol 3'	GATAGACGGAG-TEG-Chol
Cholesterol 5'	Chol-TEG-GCTGACGTAGC
