# Supplementary material for: Synthetic protein-conductive membrane nanopores built with DNA
Source: Nat Commun. 2019 Nov 4;10:5018. doi: 10.1038/s41467-019-12639-y (PMC6828756; doi:10.1038/s41467-019-12639-y)
Supplement: Supplementary file 4 — Source Data [file 41467_2019_12639_MOESM4_ESM.xlsx]

## Sheet: Figure 3
Voltage (mV)	Current (pA)	Conductance (nS)
20	52.8	2.64
20	14.8	0.74
30	106	3.53333
30	69	2.3
40	72	1.8
20	37.6	1.88
20	37.1	1.855
20	19.4	0.97
20	18.9	0.945
30	49.3	1.64333
30	57.8	1.92667
20	15.8	0.79
20	74.8	3.74
20	42.8	2.14
20	39.6	1.98
20	19.9	0.995
20	18.5	0.925
20	19.2	0.96
60	56.7	0.945
20	16.8	0.84
20	9	0.45
20	16.4	0.82
20	34.7	1.735
20	17.4	0.87
20	63.5	3.175
20	20.6	1.03
20	19.6	0.98
20	32.2	1.61
20	19.7	0.985
20	23.9	1.195
20	25.7	1.285
20	16.9	0.845
20	28.7	1.435
20	15.1	0.755
20	37.8	1.89
20	17.9	0.895
20	13.8	0.69
20	18.1	0.905
20	19.2	0.96
20	10	0.5
-50	-195.6	3.912
20	18.9	0.945
20	49	2.45
20	40.2	2.01
20	23.6	1.18
20	23.3	1.165
20	34.7	1.735
20	76.9	3.845
20	22.5	1.125
20	16.4	0.82
20	20.7	1.035
20	19.5	0.975
20	19.5	0.975
20	18.7	0.935
20	53.3	2.665
20	56.6	2.83
20	35.3	1.765
20	20.6	1.03
20	37.1	1.855
20	20	1
20	39.7	1.985
20	19	0.95
20	18.6	0.93
20	20	1
20	38.9	1.945
20	21.1	1.055
20	13.9	0.695
20	14.3	0.715
20	20.1	1.005
20	58.7	2.935
20	22.5	1.125
20	50.8	2.54
20	16.6	0.83
20	74.3	3.715
20	110.5	5.525
20	97.1	4.855
20	27.5	1.375
20	24.9	1.245
20	20.7	1.035
20	25.6	1.28
20	34.8	1.74
20	15.7	0.785
50	212.3	4.246
20	21.1	1.055
20	56	2.8
20	24.4	1.22
20	18	0.9
20	23.6	1.18
20	37.1	1.855
20	17.9	0.895
20	33.9	1.695
20	37.6	1.88
20	35.2	1.76
20	21.6	1.08
20	76.7	3.835
20	40.5	2.025
20	18.9	0.945
20	19	0.95

## Sheet: Figure 4
Type I events		Type II events
Dwell time (ms)	Blockage (%)	Dwell time (ms)	Blockage (%)
0.5	2.03696	0.5	30.1349
0.5	5.01493	0.5	30.996
0.5	5.03696	0.5	31.1765
0.5	5.03696	0.5	31.4325
0.5	5.03696	0.5	31.5831
0.5	5.03696	0.5	31.7356
0.5	5.08105	0.5	32.8173
0.5	5.14672	0.5	32.9176
0.5	5.20774	0.5	33.0731
0.5	5.22921	0.5	33.4541
0.5	5.26771	0.5	33.7513
0.5	5.30861	0.5	33.861
0.5	5.3133	0.5	33.9325
0.5	5.32782	0.5	34.5302
0.5	5.4756	0.5	34.728
0.5	5.60481	0.5	34.79
0.5	5.64281	0.5	35.4729
0.5	5.66581	0.5	36.1498
0.5	5.70292	0.5	36.252
0.5	5.70965	0.5	36.435
0.5	5.78649	0.5	36.7031
0.5	5.82246	0.5	36.8508
0.5	5.85864	0.5	37.212
0.5	5.95469	0.5	37.7782
0.5	5.97904	0.5	38.1707
0.5	5.98897	0.5	38.1779
0.5	6.00821	0.5	38.2823
0.5	6.04311	0.5	38.3865
0.5	6.13328	0.5	38.6192
0.5	6.26949	0.5	38.7749
0.5	6.3467	0.5	39.008
0.5	6.39393	0.5	39.2851
0.5	6.40967	0.5	39.3066
0.5	6.41567	0.5	39.819
0.5	6.45595	0.5	39.8862
0.5	6.53153	0.5	40.2931
0.5	6.55874	0.5	40.6119
0.5	6.56702	0.5	41.1454
0.5	6.62357	0.5	41.2298
0.5	6.65038	0.5	41.2943
0.5	6.69207	0.5	41.3747
0.5	6.6941	0.5	41.5555
0.5	6.72595	0.5	41.7695
0.5	6.82188	0.5	41.8135
0.5	6.82327	0.5	41.9063
0.5	6.99786	0.5	42.1562
0.5	7.01913	0.5	42.2955
0.5	7.01913	0.5	42.4496
0.5	7.01913	0.5	42.515
0.5	7.03928	0.5	42.6996
0.5	7.03928	0.5	42.731
0.5	7.08755	0.5	42.7844
0.5	7.08755	0.5	43.0812
0.5	7.12166	0.5	43.1607
0.5	7.12166	0.5	43.3799
0.5	7.23285	0.5	43.472
0.5	7.23285	0.5	43.6815
0.5	7.24258	0.5	43.7018
0.5	7.37681	0.5	43.8036
0.5	7.39361	0.5	44.0893
0.5	7.49663	0.5	44.1442
0.5	7.50165	0.5	44.185
0.5	7.62422	0.5	44.1939
0.5	7.76637	0.5	44.3341
0.5	7.89757	0.5	44.4087
0.5	7.97192	0.5	44.46
0.5	8.13911	0.5	44.4756
0.5	8.29238	0.5	44.5065
0.5	8.33006	0.5	44.6231
0.5	8.37654	0.5	44.669
0.5	8.4987	0.5	44.7107
0.5	8.50352	0.5	44.8038
0.5	8.52181	0.5	45.0738
0.5	8.54278	0.5	45.108
0.5	8.68483	0.5	45.1171
0.5	8.94252	0.5	45.1894
0.5	9.17142	0.5	45.2578
0.5	9.33295	0.5	45.2821
0.5	9.63871	0.5	45.3049
0.5	9.66273	0.5	45.3629
0.5	9.84254	0.5	45.4735
0.5	9.88035	0.5	45.7251
0.5	10.0194	0.5	45.737
0.5	10.0793	0.5	45.7967
0.5	10.1109	0.5	45.9184
0.5	10.2896	0.5	46.1367
0.5	10.2896	0.5	46.4428
0.5	10.2896	0.5	46.5517
0.5	10.2896	0.5	46.6054
0.5	10.3235	0.5	46.6506
0.5	10.3799	0.5	46.6923
0.5	10.4001	0.5	46.9075
0.5	10.4001	0.5	46.965
0.5	10.4001	0.5	47.0673
0.5	10.4001	0.5	47.2796
0.5	10.8023	0.5	47.4072
0.5	10.8262	0.5	47.4344
0.5	11.083	0.5	47.4518
0.5	11.1231	0.5	47.5825
0.5	11.2181	0.5	47.5825
0.5	11.3411	0.5	47.5973
0.5	11.466	0.5	47.6886
0.5	11.5381	0.5	47.8416
0.5	11.549	0.5	47.8478
0.5	11.7495	0.5	47.9914
0.5	11.9487	0.5	48.0444
0.5	11.9561	0.5	48.1132
0.5	12.0036	0.5	48.1283
0.5	12.112	0.5	48.1512
0.5	12.1751	0.5	48.1616
0.5	12.1927	0.5	48.2152
0.5	12.379	0.5	48.2193
0.5	12.398	0.5	48.2193
0.5	12.4041	0.5	48.3131
0.5	12.5864	0.5	48.3786
0.5	12.633	0.5	48.3991
0.5	12.7237	0.5	48.4316
0.5	12.7978	0.5	48.4528
0.5	12.8159	0.5	48.5581
0.5	12.8394	0.5	48.6464
0.5	12.9193	0.5	48.6691
0.5	12.9264	0.5	48.8231
0.5	12.9881	0.5	48.8288
0.5	13.0179	0.5	49.0408
0.5	13.0274	0.5	49.0522
0.5	13.0417	0.5	49.1536
0.5	13.0868	0.5	49.1602
0.5	13.3257	0.5	49.1855
0.5	13.3435	0.5	49.2569
0.5	13.4376	0.5	49.2808
0.5	13.4448	0.5	49.2922
0.5	13.5218	0.5	49.4494
0.5	13.5962	0.5	49.4908
0.5	13.7134	0.5	49.5754
0.5	13.813	0.5	49.6571
0.5	13.8133	0.5	49.6655
0.5	13.853	0.5	49.8294
0.5	13.9568	0.5	49.9177
0.5	13.9769	0.5	50.1937
0.5	13.9832	0.5	50.2732
0.5	14.0089	0.5	50.3342
0.5	14.0852	0.5	50.3799
0.5	14.2354	0.5	50.5498
0.5	14.2552	0.5	50.7603
0.5	14.2707	0.5	50.7711
0.5	14.2708	0.5	50.8818
0.5	14.2978	0.5	51.0864
0.5	14.3323	0.5	51.0976
0.5	14.3542	0.5	51.1285
0.5	14.4502	0.5	51.1915
0.5	14.525	0.5	51.2645
0.5	14.5767	0.5	51.603
0.5	14.6164	0.5	51.7265
0.5	14.6373	0.5	51.7865
0.5	14.666	0.5	51.8066
0.5	14.6739	0.5	51.8579
0.5	14.6786	0.5	51.8733
0.5	14.7435	0.5	51.8773
0.5	14.753	0.5	52.0288
0.5	14.803	0.5	52.2952
0.5	14.8411	0.5	52.4879
0.5	14.9207	0.5	52.5211
0.5	14.9419	0.5	52.572
0.5	14.9532	0.5	52.5906
0.5	14.9835	0.5	52.6141
0.5	15.0216	0.5	52.7323
0.5	15.0761	0.5	52.7357
0.5	15.115	0.5	52.7774
0.5	15.1339	0.5	52.7818
0.5	15.1532	0.5	52.8409
0.5	15.1845	0.5	52.8517
0.5	15.2055	0.5	52.9031
0.5	15.2205	0.5	52.9131
0.5	15.3102	0.5	52.9805
0.5	15.334	0.5	52.9882
0.5	15.3585	0.5	53.0446
0.5	15.4447	0.5	53.1503
0.5	15.4719	0.5	53.1883
0.5	15.5621	0.5	53.2502
0.5	15.582	0.5	53.2777
0.5	15.6204	0.5	53.3175
0.5	15.6451	0.5	53.327
0.5	15.7132	0.5	53.3392
0.5	15.8387	0.5	53.358
0.5	15.8414	0.5	53.4371
0.5	15.8655	0.5	53.5044
0.5	15.9336	0.5	53.5843
0.5	15.9902	0.5	53.666
0.5	16.0124	0.5	53.6664
0.5	16.0757	0.5	53.6685
0.5	16.1039	0.5	53.6994
0.5	16.1537	0.5	53.7013
0.5	16.224	0.5	53.7716
0.5	16.2428	0.5	53.7892
0.5	16.2608	0.5	53.8361
0.5	16.3373	0.5	53.8518
0.5	16.4408	0.5	53.8552
0.5	16.4933	0.5	53.9364
0.5	16.5306	0.5	54.0091
0.5	16.5374	0.5	54.0141
0.5	16.5643	0.5	54.0362
0.5	16.565	0.5	54.0838
0.5	16.6595	0.5	54.0986
0.5	16.7632	0.5	54.196
0.5	16.801	0.5	54.2271
0.5	16.8266	0.5	54.3491
0.5	16.8404	0.5	54.3565
0.5	16.8731	0.5	54.3967
0.5	16.9103	0.5	54.4158
0.5	16.9345	0.5	54.6918
0.5	16.9578	0.5	54.7258
0.5	17.0176	0.5	54.8216
0.5	17.1625	0.5	54.9205
0.5	17.1758	0.5	54.9263
0.5	17.1868	0.5	55.0694
0.5	17.2974	0.5	55.1401
0.5	17.3677	0.5	55.2544
0.5	17.3918	0.5	55.2653
0.5	17.4379	0.5	55.3107
0.5	17.5963	0.5	55.3721
0.5	17.6805	0.5	55.5984
0.5	17.6838	0.5	55.6153
0.5	17.7124	0.5	55.6778
0.5	17.7935	0.5	55.7078
0.5	17.8948	0.5	55.7109
0.5	17.9814	0.5	55.7261
0.5	17.9886	0.5	55.7421
0.5	18.0514	0.5	55.7553
0.5	18.0744	0.5	55.7924
0.5	18.09	0.5	55.8615
0.5	18.1418	0.5	55.9624
0.5	18.2431	0.5	56.1399
0.5	18.2921	0.5	56.145
0.5	18.3039	0.5	56.1539
0.5	18.3545	0.5	56.1911
0.5	18.5526	0.5	56.2959
0.5	18.5874	0.5	56.478
0.5	18.6105	0.5	56.5088
0.5	18.6568	0.5	56.5095
0.5	18.6596	0.5	56.5143
0.5	18.6809	0.5	56.5365
0.5	18.6869	0.5	56.5539
0.5	18.7313	0.5	56.5866
0.5	18.9369	0.5	56.626
0.5	18.952	0.5	56.6264
0.5	19.1194	0.5	56.7034
0.5	19.4947	0.5	56.717
0.5	19.5653	0.5	56.8545
0.5	19.6265	0.5	56.922
0.5	19.8716	0.5	57.0136
0.5	20.0738	0.5	57.0467
0.5	20.1001	0.5	57.0803
0.5	20.4163	0.5	57.1535
0.5	20.5069	0.5	57.1849
0.5	20.52	0.5	57.1864
0.5	20.6865	0.5	57.2093
0.5	20.729	0.5	57.2685
0.5	20.7396	0.5	57.2943
0.5	20.8377	0.5	57.5406
0.5	20.9813	0.5	57.6243
0.5	20.9909	0.5	57.688
0.5	22.3798	0.5	57.7739
0.5	22.5124	0.5	57.7774
0.5	22.5818	0.5	57.8058
0.5	22.6583	0.5	57.8317
0.5	22.8741	0.5	57.8434
0.5	22.9591	0.5	57.8703
0.5	23.0284	0.5	57.9405
0.5	23.1071	0.5	57.9644
0.5	23.1991	0.5	58.0076
0.5	23.5166	0.5	58.0087
0.5	23.5921	0.5	58.0284
0.5	24.9316	0.5	58.0918
0.5	25.0707	0.5	58.0919
0.5	26.4949	0.5	58.12
0.5	26.7735	0.5	58.1567
0.5	27.0264	0.5	58.1881
0.5	27.6065	0.5	58.2313
0.5	27.8684	0.5	58.2594
0.5	29.0776	0.5	58.3443
0.5075	5.00167	0.5	58.4265
0.5075	6.36024	0.5	58.4404
0.5075	6.79565	0.5	58.4475
0.5075	10.6344	0.5	58.4628
0.5075	11.1172	0.5	58.4712
0.5075	11.6162	0.5	58.4966
0.5075	11.74	0.5	58.5223
0.5075	11.9859	0.5	58.5791
0.5075	18.2441	0.5	58.6038
0.5077	5.23	0.5	58.6414
0.5077	5.47039	0.5	58.6431
0.5077	6.49296	0.5	58.6789
0.5077	6.74868	0.5	58.8042
0.5077	9.74508	0.5	58.9102
0.5077	12.3895	0.5	58.9265
0.5077	13.9117	0.5	59.0771
0.5077	14.3005	0.5	59.1705
0.5077	17.2826	0.5	59.2486
0.5077	23.4035	0.5	59.3016
0.5078	10.7479	0.5	59.3206
0.5079	8.5581	0.5	59.5624
0.5079	9.75688	0.5	59.6132
0.5079	11.0108	0.5	59.6153
0.5079	13.4746	0.5	59.6524
0.5079	18.6265	0.5	59.7677
0.5079	18.8548	0.5	59.8599
0.5079	22.6795	0.5	59.888
0.5079	22.7719	0.5	59.9983
0.508	5.20726	0.5	60.0316
0.508	5.23368	0.5	60.1085
0.508	7.53865	0.5	60.1743
0.508	8.32281	0.5	60.1822
0.508	10.9198	0.5	60.2047
0.508	12.5649	0.5	60.215
0.508	13.6633	0.5	60.3894
0.508	14.4392	0.5	60.4731
0.508	15.7687	0.5	60.5481
0.508	17.3509	0.5	60.5723
0.508	17.4732	0.5	60.575
0.508	18.542	0.5	60.6486
0.508	18.8143	0.5	60.725
0.508	22.8286	0.5	60.7974
0.5154	15.9595	0.5	60.8246
0.5155	5.08628	0.5	60.849
0.5155	5.14833	0.5	60.9528
0.5155	5.18495	0.5	60.9533
0.5155	5.19397	0.5	61.1121
0.5155	5.20907	0.5	61.1264
0.5155	5.24778	0.5	61.1333
0.5155	5.2657	0.5	61.1357
0.5155	5.27476	0.5	61.1528
0.5155	5.48829	0.5	61.1636
0.5155	5.57721	0.5	61.2694
0.5155	5.67319	0.5	61.3313
0.5155	6.158	0.5	61.5013
0.5155	6.22923	0.5	61.9019
0.5155	6.28393	0.5	62.061
0.5155	6.55724	0.5	62.2067
0.5155	6.58474	0.5	62.2704
0.5155	6.63478	0.5	62.4074
0.5155	6.88185	0.5	62.42
0.5155	7.03194	0.5	62.5963
0.5155	7.03194	0.5	62.8029
0.5155	8.15149	0.5	62.8495
0.5155	8.72059	0.5	62.9245
0.5155	9.7589	0.5	63.2086
0.5155	9.80951	0.5	63.3972
0.5155	9.86	0.5	63.4843
0.5155	9.97291	0.5	63.6881
0.5155	10.3086	0.5	63.6888
0.5155	10.3344	0.5	64.3523
0.5155	10.619	0.5	64.5319
0.5155	10.9339	0.5	64.6393
0.5155	11.4122	0.5	64.7913
0.5155	12.2029	0.5	65.0604
0.5155	12.2408	0.5	65.0765
0.5155	12.3193	0.5	65.3771
0.5155	12.3298	0.5	65.3894
0.5155	12.361	0.5	65.4015
0.5155	12.3993	0.5	66.0055
0.5155	12.8729	0.5	66.045
0.5155	12.9783	0.5	66.0516
0.5155	13.0067	0.5	66.0932
0.5155	13.2337	0.5	66.4663
0.5155	13.3563	0.5	66.7351
0.5155	13.6999	0.5	67.6441
0.5155	13.7408	0.5	68.1737
0.5155	14.1276	0.5	68.7096
0.5155	14.1611	0.5	69.317
0.5155	14.2803	0.5	69.5494
0.5155	14.4366	0.5	70.1239
0.5155	14.6482	0.5	70.1284
0.5155	14.6809	0.5	70.1573
0.5155	14.7039	0.5	70.1743
0.5155	15.4563	0.5	70.2869
0.5155	15.5353	0.5	70.5947
0.5155	15.7365	0.5	70.6586
0.5155	15.9252	0.5	70.6638
0.5155	16.2715	0.5	70.7832
0.5155	16.3313	0.5	70.88
0.5155	16.4384	0.5	70.8851
0.5155	16.532	0.5	71.3927
0.5155	17.6753	0.5	71.6218
0.5155	17.8554	0.5	71.6238
0.5155	18.1108	0.5	71.6739
0.5155	18.791	0.5	71.9873
0.5155	19.4589	0.5	72.111
0.5155	19.6296	0.5	72.1529
0.5155	19.9453	0.5	72.294
0.5155	20.2376	0.5	72.5015
0.5155	20.5902	0.5	72.5175
0.5155	20.6383	0.5	72.6079
0.5155	20.8479	0.5	73.1388
0.5155	20.9927	0.5	73.1693
0.5155	22.3394	0.5	73.3625
0.5155	22.5398	0.5	73.4432
0.5155	22.5667	0.5	73.7328
0.5155	22.7269	0.5	73.754
0.5155	22.7435	0.5	73.7773
0.5155	23.3173	0.5	73.8152
0.5155	24.954	0.5	74.0268
0.5155	26.8792	0.5	74.0821
0.5155	29.9399	0.5	74.0865
0.5156	5.42389	0.5	74.1072
0.5156	5.43958	0.5	74.2007
0.5156	5.47646	0.5	74.2572
0.5156	5.58826	0.5	74.5983
0.5156	6.01381	0.5	74.649
0.5156	6.56258	0.5	75.0203
0.5156	9.17693	0.5	75.0676
0.5156	10.1752	0.5	75.1096
0.5156	10.3031	0.5	75.1748
0.5156	10.3031	0.5	75.1754
0.5156	10.3031	0.5	75.2456
0.5156	10.3031	0.5	75.3944
0.5156	10.8916	0.5	75.4103
0.5156	11.9089	0.5	75.471
0.5156	12.2534	0.5	75.5576
0.5156	13.1642	0.5	75.5831
0.5156	13.6498	0.5	75.6262
0.5156	14.1961	0.5	75.8123
0.5156	16.1563	0.5	75.9093
0.5156	16.4237	0.5	76.0108
0.5156	16.5129	0.5	76.0527
0.5156	18.7344	0.5	76.3604
0.5156	18.9333	0.5	76.3657
0.5156	19.889	0.5	76.4022
0.5156	20.7845	0.5	76.438
0.5156	22.7067	0.5	76.627
0.5157	2.06524	0.5	76.8595
0.5157	5.06524	0.5	76.8707
0.5157	5.06524	0.5	77.08
0.5157	5.36946	0.5	77.2369
0.5157	6.30264	0.5	77.4128
0.5157	6.9131	0.5	77.466
0.5157	8.17571	0.5	77.5259
0.5157	11.4962	0.5	77.6061
0.5157	12.0152	0.5	77.6071
0.5157	13.9535	0.5	78.3127
0.5157	14.761	0.5	78.5044
0.5157	15.0576	0.5	78.7082
0.5157	15.7721	0.5	78.7352
0.5157	16.333	0.5	78.9578
0.5157	16.5549	0.5	79.5888
0.5157	17.4209	0.5	80.3537
0.5157	18.0224	0.5	80.711
0.5157	18.1372	0.5	80.7453
0.5157	20.4893	0.5	81.1315
0.5157	22.259	0.5	82.432
0.5157	22.5147	0.5	86.5375
0.5157	22.5773	0.5	86.7359
0.5157	23.3797	0.5	88.1923
0.5157	23.6193	0.5	88.5032
0.5158	5.30362	0.5	89.0309
0.5158	5.43681	0.5	89.2957
0.5158	5.47873	0.5	89.4374
0.5158	5.73259	0.5	89.5726
0.5158	6.00341	0.5	94.2915
0.5158	8.92474	0.5075	45.6376
0.5158	10.3959	0.5075	50.3933
0.5158	10.4277	0.5075	51.562
0.5158	12.7018	0.5075	51.6526
0.5158	12.9257	0.5075	53.9223
0.5158	14.0361	0.5075	54.1832
0.5158	14.164	0.5075	54.2524
0.5158	15.3305	0.5075	54.5589
0.5158	15.6435	0.5075	55.0264
0.5158	16.0451	0.5075	55.3458
0.5158	17.1404	0.5075	55.678
0.5158	17.8783	0.5075	56.5404
0.5158	18.8268	0.5075	56.642
0.5158	19.4239	0.5075	57.1717
0.5158	20.3255	0.5075	57.3824
0.5158	20.6238	0.5075	58.5234
0.5158	22.2998	0.5075	58.6188
0.5158	22.5414	0.5075	59.1714
0.5158	22.8452	0.5075	59.2861
0.5158	23.2741	0.5075	60.1862
0.5158	23.3769	0.5075	62.5965
0.5158	23.4311	0.5075	66.3283
0.5158	25.0132	0.5075	70.4017
0.5158	29.6858	0.5075	73.3184
0.5159	5.21476	0.5075	97.0509
0.5159	5.39861	0.5077	47.4744
0.5159	9.98773	0.5077	49.4849
0.5159	10.4001	0.5077	50.307
0.5159	10.4881	0.5077	50.4463
0.5159	14.8649	0.5077	51.4969
0.5159	15.5927	0.5077	52.2751
0.5159	15.6074	0.5077	53.2352
0.5159	15.8498	0.5077	53.3263
0.5159	17.7361	0.5077	54.4194
0.5159	19.5092	0.5077	54.7934
0.5159	21.9624	0.5077	55.3207
0.5159	22.0962	0.5077	56.3721
0.5159	22.1803	0.5077	58.2148
0.5159	22.4314	0.5077	59.5341
0.5159	23.2586	0.5077	60.1387
0.5159	24.8727	0.5077	60.7151
0.531	5.40937	0.5077	60.7467
0.531	5.65272	0.5077	62.5533
0.531	10.3853	0.5077	68.0441
0.531	11.8253	0.5077	73.5613
0.531	12.0948	0.5077	75.6628
0.531	12.5591	0.5077	76.2164
0.531	13.0393	0.5078	50.4105
0.531	13.5454	0.5078	52.665
0.531	14.4307	0.5078	61.8186
0.531	15.473	0.5078	76.5584
0.531	15.6761	0.5079	34.6082
0.531	15.7773	0.5079	44.5341
0.531	16.6279	0.5079	44.866
0.531	16.7046	0.5079	45.1784
0.531	18.8533	0.5079	48.7829
0.531	19.3557	0.5079	48.874
0.531	19.799	0.5079	50.7189
0.531	22.5216	0.5079	50.7919
0.5312	2.04511	0.5079	50.9543
0.5312	5.00359	0.5079	52.9196
0.5312	5.01101	0.5079	53.072
0.5312	5.01518	0.5079	53.0809
0.5312	5.04511	0.5079	53.393
0.5312	5.04511	0.5079	53.6629
0.5312	5.04511	0.5079	54.7876
0.5312	5.04511	0.5079	54.8042
0.5312	5.14535	0.5079	54.8424
0.5312	5.17751	0.5079	54.9209
0.5312	5.2119	0.5079	55.917
0.5312	5.21783	0.5079	55.9762
0.5312	5.46132	0.5079	56.2077
0.5312	5.58768	0.5079	56.468
0.5312	5.72006	0.5079	57.2856
0.5312	6.72997	0.5079	58.4536
0.5312	6.76435	0.5079	58.8512
0.5312	6.80025	0.5079	59.1894
0.5312	6.96759	0.5079	59.2992
0.5312	6.99899	0.5079	59.3024
0.5312	9.14832	0.5079	59.7546
0.5312	10.0003	0.5079	59.9766
0.5312	10.1752	0.5079	60.1093
0.5312	10.1752	0.5079	62.7195
0.5312	10.1752	0.5079	62.7543
0.5312	10.1752	0.5079	63.2614
0.5312	11.2026	0.5079	63.8655
0.5312	12.4137	0.5079	67.7865
0.5312	12.695	0.508	31.1273
0.5312	13.2932	0.508	38.1052
0.5312	13.5775	0.508	43.9589
0.5312	15.0989	0.508	47.2301
0.5312	15.1266	0.508	48.332
0.5312	15.73	0.508	49.4962
0.5312	16.3383	0.508	50.2612
0.5312	17.4349	0.508	52.3641
0.5312	18.4972	0.508	52.9022
0.5312	19.3773	0.508	52.9713
0.5312	22.1683	0.508	53.5505
0.5312	22.3244	0.508	53.6502
0.5312	22.501	0.508	53.7191
0.5312	23.38	0.508	54.0852
0.5313	5.62948	0.508	54.1578
0.5313	5.76692	0.508	55.2002
0.5313	6.22709	0.508	55.4006
0.5313	6.4123	0.508	55.6714
0.5313	6.65038	0.508	57.3145
0.5313	6.65497	0.508	57.3796
0.5313	6.7082	0.508	57.4985
0.5313	7.96181	0.508	58.3824
0.5313	10.7916	0.508	59.1461
0.5313	16.3861	0.508	59.2572
0.5313	16.5708	0.508	59.3869
0.5313	18.054	0.508	59.7602
0.5313	18.5229	0.508	60.2666
0.5313	18.5999	0.508	60.9002
0.5313	20.3473	0.508	61.1493
0.5313	23.6009	0.508	61.5972
0.5313	24.9094	0.508	62.4083
0.5315	6.6337	0.508	67.9093
0.5315	7.09082	0.508	73.3147
0.5315	7.09082	0.508	75.1508
0.5315	8.66623	0.508	75.8
0.5315	11.2966	0.508	77.7816
0.5315	11.5013	0.5154	51.3226
0.5315	11.7793	0.5154	57.0975
0.5315	12.0176	0.5154	57.7118
0.5315	12.4344	0.5154	59.0354
0.5315	13.6254	0.5154	59.5209
0.5315	16.9141	0.5154	61.7327
0.5315	17.1844	0.5154	62.5007
0.5315	19.7205	0.5155	35.8867
0.5315	19.7244	0.5155	49.4457
0.5315	19.7989	0.5155	49.5546
0.5315	20.1163	0.5155	50.256
0.5315	22.6619	0.5155	50.2594
0.5625	5.45974	0.5155	50.614
0.5625	5.62217	0.5155	51.1358
0.5625	6.59653	0.5155	51.3283
0.5625	6.97247	0.5155	51.7334
0.5625	7.59875	0.5155	52.2372
0.5625	7.91054	0.5155	52.3398
0.5625	8.67439	0.5155	52.3961
0.5625	8.69705	0.5155	52.4238
0.5625	13.655	0.5155	53.0425
0.5625	13.7097	0.5155	53.603
0.5625	13.8313	0.5155	54.2382
0.5625	13.9008	0.5155	54.4245
0.5625	14.0828	0.5155	54.4572
0.5625	14.8041	0.5155	54.5073
0.5625	14.8201	0.5155	54.9314
0.5625	14.8669	0.5155	55.4516
0.5625	14.9167	0.5155	55.7541
0.5625	14.9245	0.5155	55.8015
0.5625	15.0779	0.5155	55.9938
0.5625	15.3219	0.5155	56.057
0.5625	15.3267	0.5155	56.1367
0.5625	15.4305	0.5155	56.2927
0.5625	15.4413	0.5155	56.3521
0.5625	15.467	0.5155	56.6283
0.5625	15.4727	0.5155	56.639
0.5625	15.5362	0.5155	56.9572
0.5625	15.7028	0.5155	57.1975
0.5625	15.7492	0.5155	57.5742
0.5625	15.9919	0.5155	57.5909
0.5625	16.336	0.5155	57.8202
0.5625	16.3866	0.5155	58.0387
0.5625	16.5545	0.5155	58.1582
0.5625	16.5767	0.5155	58.559
0.5625	16.5888	0.5155	58.6691
0.5625	16.8292	0.5155	59.1317
0.5625	16.9218	0.5155	59.3516
0.5625	16.9728	0.5155	59.5194
0.5625	17.0106	0.5155	60.4073
0.5625	17.2938	0.5155	60.6461
0.5625	17.3016	0.5155	60.9346
0.5625	17.5043	0.5155	61.2848
0.5625	18.3146	0.5155	61.3208
0.5625	18.3181	0.5155	61.3669
0.5625	18.6508	0.5155	61.4306
0.5625	19.8356	0.5155	61.6305
0.5625	20.4005	0.5155	62.6678
0.5625	20.7571	0.5155	62.6873
0.5625	20.9599	0.5155	62.7166
0.5625	27.3485	0.5155	63.0937
0.5935	5.12682	0.5155	63.5753
0.5935	5.58154	0.5155	63.8753
0.5935	5.8045	0.5155	64.3936
0.5935	6.08148	0.5155	64.6898
0.5935	6.59193	0.5155	64.9546
0.5935	8.13092	0.5155	67.2156
0.5935	9.49654	0.5155	68.1588
0.5935	12.9411	0.5155	68.3455
0.5935	13.9776	0.5155	68.6339
0.5935	14.1114	0.5155	68.7212
0.5935	14.2401	0.5155	68.7486
0.5935	17.0902	0.5155	69.1275
0.5935	20.936	0.5155	69.4766
0.5935	21.1039	0.5155	69.7082
0.5935	23.2355	0.5155	69.8657
0.5937	5.23265	0.5155	70.5872
0.5937	8.69096	0.5155	70.7601
0.5937	11.6843	0.5155	71.153
0.5937	13.5668	0.5155	71.3001
0.5937	13.9767	0.5155	71.7297
0.5937	15.8142	0.5155	72.548
0.5937	17.538	0.5155	72.7703
0.5937	17.9641	0.5155	72.8663
0.5937	19.695	0.5155	73.0971
0.5937	20.2948	0.5155	73.3995
0.5937	20.5834	0.5155	74.0107
0.5937	22.2134	0.5155	74.3474
0.5937	22.3213	0.5155	74.959
0.5938	5.10268	0.5155	75.0018
0.5938	5.34636	0.5155	75.7965
0.5938	6.41785	0.5155	75.8452
0.5938	7.74803	0.5155	75.9854
0.5938	8.54711	0.5155	76.0992
0.5938	8.6524	0.5155	76.5026
0.5938	11.7616	0.5155	77.0807
0.5938	11.8894	0.5155	77.1113
0.5938	11.9527	0.5155	77.2962
0.5938	12.6729	0.5155	78.5637
0.5938	14.4473	0.5155	78.5909
0.5938	14.6972	0.5155	79.1251
0.5938	14.9401	0.5155	79.2545
0.5938	16.9343	0.5155	79.582
0.5938	18.8961	0.5155	80.7536
0.5938	19.4997	0.5155	81.5719
0.5938	20.5841	0.5156	35.184
0.594	5.23319	0.5156	39.7528
0.594	5.38699	0.5156	43.5471
0.594	5.44814	0.5156	45.066
0.594	5.86636	0.5156	49.9569
0.594	6.90451	0.5156	50.2943
0.594	8.81703	0.5156	50.7946
0.594	9.12494	0.5156	50.9927
0.594	9.59556	0.5156	51.1303
0.594	10.1109	0.5156	51.4614
0.594	10.1109	0.5156	52.0829
0.594	10.1109	0.5156	53.7842
0.594	10.1109	0.5156	54.8088
0.594	15.9206	0.5156	55.1501
0.594	20.0453	0.5156	56.1672
0.594	22.8149	0.5156	57.2829
0.6091	5.43432	0.5156	57.6416
0.6091	6.6337	0.5156	57.7755
0.6091	16.5152	0.5156	58.3859
0.6091	16.838	0.5156	59.4382
0.6091	20.1205	0.5156	59.7553
0.6091	20.2841	0.5156	60.2072
0.6091	28.804	0.5156	61.6318
0.6092	5.19746	0.5156	62.0133
0.6092	5.42967	0.5156	62.2722
0.6092	5.58906	0.5156	65.3895
0.6092	14.3025	0.5156	74.1617
0.6092	19.572	0.5156	74.6375
0.6092	20.5044	0.5156	75.3884
0.6092	23.4803	0.5156	76.1766
0.6093	5.50714	0.5156	77.9015
0.6093	10.4452	0.5156	79.6526
0.6093	14.2052	0.5157	37.1564
0.6093	14.2324	0.5157	48.9008
0.6093	15.9899	0.5157	49.0257
0.6093	18.0186	0.5157	49.2182
0.6093	19.2546	0.5157	49.4672
0.6093	20.3476	0.5157	49.9085
0.6093	20.3883	0.5157	52.4298
0.6093	22.5114	0.5157	53.4607
0.6093	22.827	0.5157	54.614
0.6093	23.3814	0.5157	54.8059
0.6093	29.7197	0.5157	54.8606
0.6094	5.77999	0.5157	54.8625
0.6094	6.72538	0.5157	55.106
0.6094	7.4606	0.5157	56.225
0.6094	19.555	0.5157	56.9209
0.6095	5.44117	0.5157	57.7
0.6095	5.54585	0.5157	58.2217
0.6095	5.68446	0.5157	58.6715
0.6095	7.44565	0.5157	60.1151
0.6095	11.823	0.5157	60.8387
0.6095	12.958	0.5157	60.9461
0.6095	13.2619	0.5157	61.0518
0.6095	14.6835	0.5157	61.8466
0.6095	14.7896	0.5157	61.9162
0.6095	15.7163	0.5157	63.6357
0.6095	15.7208	0.5157	67.1171
0.6095	16.3721	0.5157	67.2459
0.6095	17.0529	0.5157	73.1827
0.6095	18.099	0.5157	75.4134
0.6095	18.6782	0.5157	75.6714
0.6095	19.8022	0.5157	76.8231
0.6095	22.1969	0.5157	77.5694
0.6095	22.4429	0.5157	78.5917
0.6095	22.5927	0.5157	96.1464
0.6095	24.9115	0.5157	99.4358
0.6096	8.30357	0.5158	31.1562
0.6096	18.3671	0.5158	31.8975
0.617	6.26347	0.5158	33.6493
0.617	6.69207	0.5158	49.3598
0.617	9.72938	0.5158	49.694
0.617	19.5532	0.5158	50.313
0.617	20.6058	0.5158	51.3749
0.617	22.7087	0.5158	52.8805
0.617	23.2077	0.5158	53.4822
0.6171	6.1093	0.5158	53.4934
0.6171	6.62357	0.5158	53.9423
0.6171	7.74612	0.5158	53.9918
0.6171	16.4537	0.5158	54.5281
0.6171	17.3066	0.5158	55.7805
0.6171	17.9973	0.5158	56.4247
0.6171	20.0375	0.5158	56.5146
0.6171	20.7799	0.5158	56.8747
0.6171	20.9832	0.5158	57.2117
0.6172	5.4018	0.5158	57.5559
0.6172	5.54773	0.5158	57.6892
0.6172	17.6748	0.5158	57.8503
0.6173	5.02494	0.5158	59.4742
0.6173	5.88523	0.5158	60.2706
0.6173	7.23667	0.5158	62.8047
0.6173	7.23667	0.5158	63.6646
0.6173	11.8916	0.5158	64.6542
0.6173	12.2996	0.5158	64.709
0.6175	2.06336	0.5158	65.3624
0.6175	5.06336	0.5158	67.6883
0.6175	5.06336	0.5158	72.0697
0.6175	5.14799	0.5158	72.4048
0.6175	5.72239	0.5158	72.6942
0.6175	11.685	0.5158	75.3856
0.6175	19.8143	0.5158	76.3888
0.6175	23.569	0.5158	80.4271
0.625	2.03751	0.5158	81.7304
0.625	2.04869	0.5159	45.3658
0.625	5.01398	0.5159	47.1562
0.625	5.02725	0.5159	50.9259
0.625	5.03751	0.5159	50.9474
0.625	5.03751	0.5159	53.2485
0.625	5.03751	0.5159	53.6078
0.625	5.03751	0.5159	53.981
0.625	5.04869	0.5159	54.2657
0.625	5.04869	0.5159	54.7969
0.625	5.09538	0.5159	55.758
0.625	5.09937	0.5159	57.9276
0.625	5.10742	0.5159	58.2352
0.625	5.10806	0.5159	60.7775
0.625	5.12413	0.5159	61.385
0.625	5.15143	0.5159	62.5166
0.625	5.16972	0.5159	64.0714
0.625	5.21164	0.5159	67.2111
0.625	5.25011	0.5159	67.7042
0.625	5.26499	0.5159	67.8424
0.625	5.26556	0.5159	69.4988
0.625	5.32001	0.5159	71.6718
0.625	5.35647	0.5159	72.0211
0.625	5.4129	0.5159	72.7481
0.625	5.47851	0.5159	75.5228
0.625	5.50621	0.5159	75.6903
0.625	5.51375	0.5159	76.5971
0.625	5.52279	0.5159	78.1924
0.625	5.53247	0.531	31.2538
0.625	5.68984	0.531	44.8497
0.625	5.69105	0.531	48.0159
0.625	5.72777	0.531	48.2429
0.625	5.76825	0.531	49.1174
0.625	5.77244	0.531	52.5245
0.625	5.79887	0.531	53.1222
0.625	5.87602	0.531	53.6515
0.625	5.93603	0.531	54.2367
0.625	5.94325	0.531	54.613
0.625	5.96573	0.531	54.87
0.625	6.01644	0.531	55.0971
0.625	6.06552	0.531	55.5477
0.625	6.12082	0.531	55.5517
0.625	6.12813	0.531	56.0086
0.625	6.12897	0.531	56.2247
0.625	6.20584	0.531	56.8317
0.625	6.24325	0.531	56.9786
0.625	6.30263	0.531	57.0447
0.625	6.37263	0.531	57.1373
0.625	6.41948	0.531	57.1416
0.625	6.48993	0.531	57.6549
0.625	6.56258	0.531	58.1368
0.625	6.61283	0.531	58.465
0.625	6.65702	0.531	59.1191
0.625	6.67072	0.531	62.2075
0.625	6.67347	0.531	64.5634
0.625	6.6941	0.531	71.3059
0.625	6.7082	0.531	71.8171
0.625	6.72595	0.531	72.7211
0.625	6.74315	0.531	73.1193
0.625	6.81487	0.531	73.2573
0.625	6.89	0.531	73.4175
0.625	7.14043	0.531	78.1831
0.625	7.14043	0.531	78.2329
0.625	7.33841	0.531	81.1283
0.625	7.4768	0.5312	49.0176
0.625	7.50071	0.5312	49.2449
0.625	7.52079	0.5312	51.6716
0.625	7.55984	0.5312	52.1286
0.625	7.6075	0.5312	52.7735
0.625	7.67264	0.5312	52.9378
0.625	7.76604	0.5312	52.9575
0.625	7.86263	0.5312	53.4593
0.625	7.8951	0.5312	53.557
0.625	7.90839	0.5312	53.8351
0.625	8.04453	0.5312	54.0291
0.625	8.06552	0.5312	54.2303
0.625	8.07447	0.5312	54.3605
0.625	8.17778	0.5312	55.4091
0.625	8.18582	0.5312	55.6675
0.625	8.55	0.5312	55.7249
0.625	8.64213	0.5312	56.2946
0.625	8.87679	0.5312	56.6228
0.625	9.04088	0.5312	56.6374
0.625	9.16584	0.5312	57.0554
0.625	9.42211	0.5312	57.2056
0.625	9.84681	0.5312	57.2111
0.625	9.88763	0.5312	57.5821
0.625	9.9332	0.5312	57.762
0.625	10.0722	0.5312	57.9844
0.625	10.2528	0.5312	58.0997
0.625	10.2528	0.5312	58.2267
0.625	10.2528	0.5312	58.4778
0.625	10.2528	0.5312	58.6847
0.625	10.4176	0.5312	58.9994
0.625	10.4277	0.5312	59.52
0.625	10.4277	0.5312	59.6878
0.625	10.4277	0.5312	59.699
0.625	10.4277	0.5312	59.7436
0.625	10.4605	0.5312	60.432
0.625	10.7597	0.5312	61.2045
0.625	10.9859	0.5312	61.968
0.625	11.1006	0.5312	64.2543
0.625	11.5773	0.5312	65.3314
0.625	11.6382	0.5312	67.174
0.625	11.6983	0.5312	67.2168
0.625	11.8715	0.5312	67.487
0.625	11.8852	0.5312	70.0261
0.625	11.9365	0.5312	70.8485
0.625	11.9888	0.5312	71.0386
0.625	12.2907	0.5312	71.6218
0.625	12.8339	0.5312	71.7105
0.625	13.0409	0.5312	72.3237
0.625	13.1139	0.5312	72.685
0.625	13.1168	0.5312	72.8032
0.625	13.192	0.5312	73.2556
0.625	13.2407	0.5312	73.3374
0.625	13.6322	0.5312	73.8459
0.625	13.7758	0.5312	73.9224
0.625	13.8072	0.5312	74.4734
0.625	13.8383	0.5312	77.9715
0.625	13.9477	0.5312	80.4278
0.625	14.2975	0.5313	45.0611
0.625	14.6828	0.5313	51.0609
0.625	14.7379	0.5313	52.6401
0.625	14.753	0.5313	52.7965
0.625	14.7725	0.5313	54.3582
0.625	14.8016	0.5313	54.3714
0.625	14.8399	0.5313	54.6375
0.625	14.8967	0.5313	55.2278
0.625	14.9214	0.5313	55.4633
0.625	14.9331	0.5313	55.4936
0.625	15.0535	0.5313	56.4118
0.625	15.1955	0.5313	56.6795
0.625	15.2906	0.5313	56.7554
0.625	15.4507	0.5313	57.4482
0.625	15.519	0.5313	57.8031
0.625	15.523	0.5313	58.5327
0.625	15.5883	0.5313	59.5426
0.625	15.7136	0.5313	60.22
0.625	15.7343	0.5313	60.228
0.625	15.7423	0.5313	61.2593
0.625	15.8299	0.5313	61.8447
0.625	15.8607	0.5313	61.8705
0.625	15.8917	0.5313	62.6941
0.625	15.9055	0.5313	64.1019
0.625	15.9201	0.5313	68.8579
0.625	15.9217	0.5313	70.3963
0.625	15.9484	0.5313	70.8251
0.625	16.0144	0.5313	71.0999
0.625	16.2485	0.5313	72.0907
0.625	16.3002	0.5313	72.8686
0.625	16.4194	0.5313	73.2576
0.625	16.4211	0.5313	73.9129
0.625	16.4348	0.5313	74.5208
0.625	16.4464	0.5313	75.9569
0.625	16.5048	0.5313	82.4681
0.625	16.6616	0.5313	94.7287
0.625	16.6918	0.5315	32.2495
0.625	16.7882	0.5315	49.1273
0.625	16.8304	0.5315	49.6475
0.625	16.8899	0.5315	49.6522
0.625	16.9961	0.5315	51.3213
0.625	17.1387	0.5315	51.8965
0.625	17.199	0.5315	52.5042
0.625	17.2689	0.5315	53.6352
0.625	17.3033	0.5315	54.312
0.625	17.38	0.5315	54.5769
0.625	17.4218	0.5315	54.6097
0.625	17.4426	0.5315	54.7392
0.625	17.5061	0.5315	54.8307
0.625	17.5088	0.5315	55.058
0.625	17.5221	0.5315	55.171
0.625	17.5694	0.5315	55.3202
0.625	17.5987	0.5315	55.8411
0.625	17.6032	0.5315	55.8465
0.625	17.622	0.5315	56.5955
0.625	17.6624	0.5315	56.6826
0.625	17.7031	0.5315	56.8644
0.625	17.8787	0.5315	57.4219
0.625	17.9046	0.5315	57.6664
0.625	17.9082	0.5315	58.1399
0.625	17.921	0.5315	58.3762
0.625	18.0866	0.5315	58.3955
0.625	18.1079	0.5315	58.5793
0.625	18.1397	0.5315	58.9988
0.625	18.2162	0.5315	59.3324
0.625	18.2329	0.5315	59.5695
0.625	18.3626	0.5315	59.6039
0.625	18.451	0.5315	60.1595
0.625	18.4649	0.5315	60.8806
0.625	18.4927	0.5315	61.0265
0.625	18.6079	0.5315	61.6668
0.625	18.6692	0.5315	61.9802
0.625	18.8411	0.5315	62.0673
0.625	18.9353	0.5315	62.2057
0.625	19.054	0.5315	64.1981
0.625	19.0722	0.5315	70.1306
0.625	19.1964	0.5315	70.5599
0.625	19.2706	0.5315	71.3903
0.625	19.2965	0.5315	71.8453
0.625	19.4048	0.5315	73.7564
0.625	19.7074	0.5315	74.682
0.625	19.804	0.5315	80.2913
0.625	20.0908	0.5315	80.9421
0.625	20.3751	0.5625	35.2212
0.625	20.526	0.5625	36.4625
0.625	20.6056	0.5625	38.7098
0.625	20.7806	0.5625	39.1945
0.625	20.9717	0.5625	39.8919
0.625	21.9366	0.5625	39.9234
0.625	21.9414	0.5625	41.2854
0.625	21.9533	0.5625	41.3197
0.625	22.178	0.5625	41.5843
0.625	22.2972	0.5625	41.8837
0.625	22.4852	0.5625	43.151
0.625	22.5275	0.5625	43.5964
0.625	22.5821	0.5625	43.8355
0.625	22.6204	0.5625	44.281
0.625	22.8723	0.5625	44.3341
0.625	23.2969	0.5625	44.3604
0.625	23.4132	0.5625	44.8476
0.625	25.002	0.5625	44.92
0.625	25.002	0.5625	44.9764
0.625	27.5616	0.5625	44.9925
0.625	27.6987	0.5625	45.9735
0.625	28.7957	0.5625	46.2601
0.625	29.8373	0.5625	46.5513
0.6872	6.47816	0.5625	46.7688
0.6872	19.0064	0.5625	47.0272
0.6872	19.3235	0.5625	47.4893
0.6875	6.53229	0.5625	47.494
0.6875	6.69207	0.5625	47.6025
0.6875	6.69858	0.5625	47.6247
0.6875	6.80991	0.5625	47.7584
0.6875	9.09957	0.5625	47.7594
0.6875	12.1222	0.5625	47.9009
0.6875	13.953	0.5625	47.9962
0.6875	14.1726	0.5625	47.9999
0.6875	14.223	0.5625	48.2193
0.6875	14.2774	0.5625	48.3861
0.6875	14.9001	0.5625	48.5269
0.6875	15.1864	0.5625	48.6815
0.6875	15.3469	0.5625	49.0469
0.6875	16.1047	0.5625	49.6447
0.6875	16.1576	0.5625	49.6703
0.6875	16.3003	0.5625	50.0562
0.6875	16.3609	0.5625	50.1477
0.6875	16.3718	0.5625	50.2362
0.6875	16.4048	0.5625	50.2362
0.6875	16.4139	0.5625	50.2687
0.6875	16.459	0.5625	50.3845
0.6875	16.5712	0.5625	52.6621
0.6875	16.7034	0.5625	53.2505
0.6875	16.8798	0.5625	53.8767
0.6875	17.2196	0.5625	55.4158
0.6875	17.4873	0.5625	55.7352
0.6875	17.5872	0.5625	56.2997
0.6875	17.9352	0.5625	56.6938
0.6875	18.2141	0.5625	57.7188
0.6875	18.3158	0.5625	57.9293
0.6875	18.4595	0.5625	58.1226
0.6875	18.5153	0.5625	58.3251
0.6875	18.5284	0.5935	43.2236
0.6875	22.3983	0.5935	48.1964
0.6878	5.09545	0.5935	48.3486
0.6878	7.52225	0.5935	49.2613
0.6878	20.3175	0.5935	51.3679
0.6878	22.1737	0.5935	53.2915
0.703	5.20233	0.5935	53.579
0.703	13.3022	0.5935	54.2515
0.7107	5.36944	0.5935	55.0011
0.711	5.3243	0.5935	56.62
0.711	5.734	0.5935	57.2824
0.711	8.66513	0.5935	57.514
0.711	14.6608	0.5935	58.2889
0.711	16.8797	0.5935	58.6751
0.711	19.5265	0.5935	59.3121
0.711	22.1278	0.5935	61.9146
0.7185	5.00438	0.5935	69.406
0.7185	5.77376	0.5935	70.2485
0.7185	5.77987	0.5935	71.6173
0.7185	5.84057	0.5935	73.1486
0.7185	6.07725	0.5935	73.2126
0.7185	6.26375	0.5937	33.6334
0.7185	7.09238	0.5937	45.9546
0.7185	7.09238	0.5937	50.8681
0.7185	7.31488	0.5937	53.4277
0.7185	7.44859	0.5937	53.5216
0.7185	8.00067	0.5937	53.6885
0.7185	8.76531	0.5937	54.5219
0.7185	8.86045	0.5937	54.7458
0.7185	12.3599	0.5937	55.0998
0.7185	12.9843	0.5937	56.0185
0.7185	14.8615	0.5937	56.3255
0.7185	16.7955	0.5937	56.8071
0.7185	17.3069	0.5937	57.3258
0.7185	18.0268	0.5937	57.5328
0.7185	18.2875	0.5937	58.4739
0.7185	19.5903	0.5937	64.0251
0.7185	19.6969	0.5937	65.1376
0.7185	20.0167	0.5937	70.9662
0.7185	20.1966	0.5937	71.441
0.7185	20.4774	0.5937	71.5559
0.7185	22.3948	0.5937	72.876
0.7185	29.7017	0.5937	74.0806
0.7186	5.21608	0.5937	75.4931
0.7186	17.4884	0.5937	79.4955
0.7186	20.0405	0.5937	81.051
0.7187	2.04274	0.5938	33.7518
0.7187	5.04274	0.5938	51.1262
0.7187	5.04274	0.5938	51.7182
0.7187	5.04274	0.5938	51.8445
0.7187	5.04274	0.5938	52.0739
0.7187	5.3998	0.5938	53.2878
0.7187	5.45239	0.5938	54.633
0.7187	5.69131	0.5938	54.6949
0.7187	6.59193	0.5938	55.9241
0.7187	7.05037	0.5938	56.0559
0.7187	7.05037	0.5938	56.1251
0.7187	7.30312	0.5938	56.4316
0.7187	7.62565	0.5938	56.6953
0.7187	7.70624	0.5938	56.8774
0.7187	13.0611	0.5938	57.0188
0.7187	13.5034	0.5938	57.6323
0.7187	13.5081	0.5938	57.7475
0.7187	14.8369	0.5938	58.0559
0.7187	14.8487	0.5938	58.1963
0.7187	16.5012	0.5938	58.2155
0.7187	17.4853	0.5938	58.3923
0.7187	18.006	0.5938	60.7512
0.7187	18.5643	0.5938	60.9346
0.7187	18.8132	0.5938	62.2304
0.7187	19.245	0.5938	62.9397
0.7187	19.7178	0.5938	64.562
0.7187	20.1856	0.5938	71.1922
0.7187	20.366	0.5938	72.2995
0.7187	20.7766	0.5938	72.2999
0.7187	20.9337	0.5938	73.5644
0.7187	21.073	0.5938	73.7608
0.7187	21.9366	0.5938	75.6078
0.7187	22.0472	0.5938	76.8708
0.7187	22.4191	0.5938	78.3666
0.7187	23.6017	0.5938	80.9292
0.7188	5.15191	0.5938	88.0602
0.7188	5.15709	0.5938	92.6381
0.7188	5.17221	0.594	52.0391
0.7188	5.35834	0.594	53.2434
0.7188	5.42849	0.594	53.3473
0.7188	5.52725	0.594	53.4997
0.7188	5.80718	0.594	53.9277
0.7188	5.81265	0.594	53.9751
0.7188	6.15372	0.594	54.6633
0.7188	6.58833	0.594	57.5055
0.7188	6.63478	0.594	58.8793
0.7188	7.19552	0.594	71.2662
0.7188	7.19552	0.594	74.0467
0.7188	7.35751	0.594	74.4832
0.7188	8.53448	0.594	74.9686
0.7188	8.65023	0.594	75.4676
0.7188	13.8386	0.6091	57.4675
0.7188	14.6326	0.6091	64.3387
0.7188	14.6685	0.6091	70.7699
0.7188	16.5088	0.6091	72.0583
0.7188	16.8173	0.6091	78.4298
0.7188	18.478	0.6092	52.5154
0.7188	19.4051	0.6092	52.6915
0.7188	20.8835	0.6092	54.4129
0.7188	21.0318	0.6092	54.5081
0.7188	23.2151	0.6092	59.7326
0.7188	23.3925	0.6092	60.7647
0.7188	23.6564	0.6092	62.0795
0.7189	5.23577	0.6092	62.6363
0.7189	11.3633	0.6092	64.2993
0.7189	15.4177	0.6092	64.683
0.7189	19.695	0.6092	69.2865
0.7189	22.6537	0.6092	73.4593
0.7189	22.7259	0.6092	76.4198
0.719	2.04556	0.6092	76.9165
0.719	5.04556	0.6093	50.4566
0.719	5.04556	0.6093	52.842
0.719	5.04556	0.6093	53.8793
0.719	5.04556	0.6093	53.9586
0.719	5.0714	0.6093	54.1449
0.719	5.12125	0.6093	54.7678
0.719	5.19852	0.6093	55.1092
0.719	5.24129	0.6093	56.1032
0.719	5.28281	0.6093	56.3057
0.719	5.28918	0.6093	56.3352
0.719	5.38762	0.6093	58.0085
0.719	5.47201	0.6093	58.1067
0.719	5.47483	0.6093	59.5482
0.719	5.70221	0.6093	60.1766
0.719	5.70433	0.6093	61.6214
0.719	5.74281	0.6093	62.1493
0.719	6.18783	0.6093	63.2512
0.719	6.32219	0.6093	67.3132
0.719	6.456	0.6093	68.8986
0.719	6.48889	0.6093	69.496
0.719	7.01074	0.6093	71.272
0.719	7.01074	0.6093	73.3727
0.719	7.01074	0.6093	76.9211
0.719	7.17572	0.6093	79.0408
0.719	7.17572	0.6093	80.8332
0.719	7.70039	0.6094	30.2333
0.719	7.92677	0.6094	33.4324
0.719	8.04755	0.6094	34.2957
0.719	8.39918	0.6094	50.7179
0.719	8.40461	0.6094	52.718
0.719	13.2341	0.6094	53.9672
0.719	13.2931	0.6094	55.9971
0.719	14.8772	0.6094	56.3059
0.719	15.4858	0.6094	57.3626
0.719	16.8006	0.6094	58.9336
0.719	17.8508	0.6094	60.023
0.719	18.4383	0.6094	60.3641
0.719	18.8116	0.6094	62.5149
0.719	22.0934	0.6094	66.4226
0.719	22.2405	0.6094	66.9065
0.719	22.4237	0.6094	68.5319
0.719	22.4839	0.6094	75.4878
0.719	22.5004	0.6094	77.1406
0.719	23.1171	0.6094	78.4285
0.719	23.6159	0.6094	78.5177
0.719	24.8793	0.6094	82.4635
0.75	5.40367	0.6095	30.7047
0.75	5.86644	0.6095	32.03
0.75	6.58833	0.6095	36.4922
0.75	7.1239	0.6095	39.6967
0.75	7.1239	0.6095	50.275
0.75	8.20553	0.6095	53.8511
0.75	8.33934	0.6095	55.0791
0.75	10.5599	0.6095	55.1239
0.75	10.7082	0.6095	56.0551
0.75	11.8537	0.6095	56.3597
0.75	13.1438	0.6095	57.1479
0.75	13.2951	0.6095	57.5545
0.75	13.7988	0.6095	57.7085
0.75	14.4479	0.6095	58.3807
0.75	14.521	0.6095	59.6563
0.75	14.6129	0.6095	60.238
0.75	14.6481	0.6095	60.3125
0.75	14.8862	0.6095	60.5105
0.75	14.9648	0.6095	62.4031
0.75	15.1218	0.6095	66.4729
0.75	15.34	0.6095	66.972
0.75	15.3913	0.6095	68.5053
0.75	15.7344	0.6095	69.3327
0.75	16.0147	0.6095	69.5651
0.75	16.1946	0.6095	75.3177
0.75	16.5578	0.6095	76.3738
0.75	16.5871	0.6095	76.8692
0.75	16.634	0.6095	77.082
0.75	16.7508	0.6095	78.08
0.75	17.05	0.6095	81.6309
0.75	17.1696	0.6096	48.461
0.75	17.3657	0.6096	50.9517
0.75	17.8379	0.6096	52.1587
0.75	18.0663	0.6096	54.0949
0.75	18.66	0.6096	56.2151
0.75	18.6729	0.6096	62.3143
0.75	18.7284	0.617	44.9519
0.75	18.731	0.617	47.7739
0.75	19.0759	0.617	48.087
0.75	20.8667	0.617	48.6795
0.75	21.0124	0.617	49.3298
0.8122	5.65482	0.617	49.9361
0.8122	6.11356	0.617	51.1223
0.8122	7.5353	0.617	51.2657
0.8122	10.3031	0.617	52.7395
0.8122	12.6012	0.617	52.749
0.8122	16.9695	0.617	54.2532
0.8122	19.1227	0.617	54.775
0.8122	20.3724	0.617	54.8909
0.8122	21.9217	0.617	54.9554
0.8122	23.5093	0.617	55.1369
0.8125	2.05234	0.617	55.5213
0.8125	5.02768	0.617	55.7201
0.8125	5.02768	0.617	56.2086
0.8125	5.02768	0.617	56.8619
0.8125	5.05234	0.617	56.986
0.8125	5.05234	0.617	57.1871
0.8125	5.15201	0.617	57.9504
0.8125	5.5827	0.617	58.1321
0.8125	5.58596	0.617	58.1417
0.8125	5.64252	0.617	58.3992
0.8125	5.66462	0.617	58.4707
0.8125	5.95976	0.617	58.5939
0.8125	6.18473	0.617	58.796
0.8125	6.30905	0.617	59.0218
0.8125	6.33348	0.617	59.0284
0.8125	6.37685	0.617	59.0569
0.8125	6.42272	0.617	59.5248
0.8125	6.49114	0.617	59.6609
0.8125	6.56654	0.617	59.7752
0.8125	6.56702	0.617	61.2853
0.8125	6.62357	0.617	61.6792
0.8125	6.65702	0.617	70.2608
0.8125	6.67072	0.617	71.0945
0.8125	6.69858	0.617	71.3803
0.8125	7.12292	0.617	73.7336
0.8125	7.12292	0.617	73.8189
0.8125	7.24143	0.617	74.423
0.8125	7.24143	0.617	75.8664
0.8125	7.27183	0.617	82.9086
0.8125	7.4426	0.6171	49.3603
0.8125	7.49348	0.6171	49.6948
0.8125	7.76905	0.6171	52.7354
0.8125	7.84434	0.6171	52.8218
0.8125	8.29997	0.6171	53.357
0.8125	8.36817	0.6171	53.8986
0.8125	8.81268	0.6171	54.1499
0.8125	9.024	0.6171	54.3361
0.8125	9.25825	0.6171	54.6172
0.8125	9.27698	0.6171	54.8523
0.8125	10.3344	0.6171	55.134
0.8125	10.3344	0.6171	55.3061
0.8125	10.3344	0.6171	55.4614
0.8125	10.3344	0.6171	56.6342
0.8125	10.3799	0.6171	56.922
0.8125	10.3799	0.6171	56.9234
0.8125	10.3799	0.6171	56.9357
0.8125	10.3799	0.6171	57.8173
0.8125	10.6442	0.6171	58.2729
0.8125	12.5824	0.6171	58.6486
0.8125	12.7809	0.6171	58.6603
0.8125	14.4793	0.6171	60.1857
0.8125	14.5602	0.6171	60.8206
0.8125	14.7708	0.6171	61.0755
0.8125	14.8784	0.6171	61.3671
0.8125	14.9432	0.6171	61.4336
0.8125	15.1336	0.6171	61.9569
0.8125	15.1747	0.6171	63.6128
0.8125	15.2466	0.6171	64.8571
0.8125	15.3737	0.6171	66.8812
0.8125	15.5926	0.6171	70.4627
0.8125	15.6172	0.6171	71.034
0.8125	15.645	0.6171	72.738
0.8125	15.8392	0.6171	74.0713
0.8125	15.8512	0.6172	51.1977
0.8125	16.0522	0.6172	51.3378
0.8125	16.1944	0.6172	52.815
0.8125	16.2331	0.6172	55.8534
0.8125	16.4777	0.6172	57.3818
0.8125	16.5172	0.6172	57.9631
0.8125	16.533	0.6172	60.0057
0.8125	16.5772	0.6172	71.1144
0.8125	16.6798	0.6173	30.9896
0.8125	16.7568	0.6173	49.5757
0.8125	16.8023	0.6173	50.3089
0.8125	16.9516	0.6173	52.0109
0.8125	16.9544	0.6173	52.6102
0.8125	16.9892	0.6173	54.8694
0.8125	17.1497	0.6173	55.0697
0.8125	17.1499	0.6173	55.1853
0.8125	17.1751	0.6173	55.6628
0.8125	17.3128	0.6173	55.7992
0.8125	17.4832	0.6173	55.8606
0.8125	17.4881	0.6173	56.283
0.8125	17.6122	0.6173	57.066
0.8125	17.6136	0.6173	57.487
0.8125	17.7323	0.6173	60.2742
0.8125	17.7507	0.6173	61.0736
0.8125	17.8169	0.6173	62.7325
0.8125	18.2703	0.6173	63.7041
0.8125	18.397	0.6173	64.3263
0.8125	18.6591	0.6173	71.2703
0.8125	18.6918	0.6173	71.8448
0.8125	19.4664	0.6173	74.7604
0.8125	19.8521	0.6173	75.3473
0.8125	20.1182	0.6175	49.3554
0.8125	20.1248	0.6175	51.202
0.8125	20.3456	0.6175	52.5014
0.8125	20.6812	0.6175	52.5198
0.8125	20.7947	0.6175	53.0024
0.8125	20.8366	0.6175	53.4059
0.8125	20.986	0.6175	54.5291
0.8125	22.0299	0.6175	55.8394
0.8125	22.285	0.6175	56.43
0.8125	22.5496	0.6175	56.7112
0.8125	22.5535	0.6175	57.2495
0.8125	22.8922	0.6175	57.7519
0.8125	22.9239	0.6175	57.7673
0.8125	23.4588	0.6175	58.764
0.8125	28.9643	0.6175	59.2724
0.8126	23.1001	0.6175	60.0454
0.8128	5.08863	0.6175	74.6794
0.8128	5.46534	0.625	31.5908
0.8128	6.16987	0.625	32.8777
0.8128	7.43549	0.625	33.373
0.8128	7.80966	0.625	34.9658
0.8128	7.87727	0.625	35.1211
0.8128	13.9109	0.625	35.3967
0.8128	17.9518	0.625	36.3595
0.8128	18.0923	0.625	36.8649
0.8128	22.5644	0.625	36.9304
0.82	5.19538	0.625	38.736
0.82	5.22833	0.625	39.3367
0.8201	5.56173	0.625	39.9237
0.8201	5.80915	0.625	40.5134
0.8202	6.74926	0.625	40.84
0.8202	7.12244	0.625	41.1308
0.8202	7.12244	0.625	41.1474
0.8202	12.599	0.625	41.2752
0.8203	5.02929	0.625	41.302
0.8203	5.02929	0.625	41.302
0.8203	5.02929	0.625	41.3144
0.8203	5.99182	0.625	41.3942
0.8203	8.85635	0.625	41.6863
0.8203	19.0903	0.625	41.8218
0.8203	20.3931	0.625	42.254
0.8204	5.98246	0.625	42.5404
0.8204	9.32375	0.625	42.555
0.8204	10.3959	0.625	42.5934
0.8204	10.3959	0.625	42.6694
0.8204	10.3959	0.625	42.6979
0.8204	10.3959	0.625	42.8577
0.8204	20.5063	0.625	43.4293
0.8205	2.04554	0.625	43.5113
0.8205	5.04554	0.625	43.5934
0.8205	5.04554	0.625	43.7758
0.8205	5.04554	0.625	43.8764
0.8205	5.04554	0.625	44.3341
0.8205	5.21085	0.625	44.8347
0.8205	5.23184	0.625	44.9285
0.8205	5.78112	0.625	44.9555
0.8205	6.58833	0.625	45.0281
0.8205	20.8773	0.625	45.0375
0.8205	21.02	0.625	45.5832
0.8205	22.3862	0.625	45.9427
0.8205	23.2967	0.625	45.9439
0.8205	24.887	0.625	46.0114
0.828	15.9166	0.625	46.0698
0.8281	13.0703	0.625	46.2645
0.8281	22.4462	0.625	46.4179
0.8285	5.96961	0.625	46.441
0.8285	20.2252	0.625	46.7612
0.8435	7.63105	0.625	47.1424
0.8435	20.466	0.625	47.1504
0.8435	22.6036	0.625	47.3599
0.8437	5.03598	0.625	47.4055
0.8437	5.03598	0.625	47.4055
0.8437	5.03598	0.625	47.4336
0.8437	6.71974	0.625	47.4437
0.8437	7.83306	0.625	47.4655
0.8437	14.8428	0.625	47.4842
0.8437	18.1239	0.625	47.5185
0.8438	5.92487	0.625	47.5963
0.8438	14.9543	0.625	47.724
0.8438	22.8032	0.625	47.7662
0.844	5.30963	0.625	47.9508
0.844	5.69333	0.625	47.9962
0.844	6.74744	0.625	47.9962
0.844	6.95182	0.625	48.0226
0.844	11.3654	0.625	48.036
0.844	18.3721	0.625	48.1132
0.875	6.59193	0.625	48.2388
0.875	6.87011	0.625	48.2616
0.875	7.13471	0.625	48.2901
0.875	7.13471	0.625	48.3104
0.875	9.20558	0.625	48.3786
0.875	10.3086	0.625	48.502
0.875	10.3086	0.625	48.5402
0.875	10.3086	0.625	48.5555
0.875	10.3086	0.625	48.6444
0.875	14.4314	0.625	48.7289
0.875	15.8354	0.625	48.7324
0.875	15.9952	0.625	48.8317
0.875	17.0257	0.625	49.221
0.875	18.5108	0.625	49.2319
0.875	18.5957	0.625	49.2717
0.875	18.5987	0.625	49.2834
0.875	19.5457	0.625	49.3516
0.875	20.348	0.625	49.4054
0.875	20.9349	0.625	49.4228
0.875	21.0962	0.625	49.44
0.906	2.06959	0.625	49.5285
0.906	5.06959	0.625	49.543
0.906	5.06959	0.625	49.6041
0.906	5.16798	0.625	49.7807
0.906	5.92605	0.625	49.8398
0.906	6.04115	0.625	49.8823
0.906	8.20973	0.625	49.9846
0.906	28.1996	0.625	50.1214
0.9063	5.54935	0.625	50.1629
0.9063	6.18842	0.625	50.3152
0.9063	6.50198	0.625	50.3449
0.9063	6.89755	0.625	50.3493
0.9063	7.14312	0.625	50.5015
0.9063	7.14312	0.625	50.5249
0.9063	7.60083	0.625	50.5279
0.9063	7.61987	0.625	50.6302
0.9063	18.8386	0.625	50.7669
0.9063	20.2639	0.625	50.7929
0.9063	22.6778	0.625	50.8233
0.9063	23.0095	0.625	50.8283
0.9065	6.34808	0.625	50.9438
0.9065	6.8795	0.625	50.9619
0.9065	19.2729	0.625	51.0678
0.9065	23.6286	0.625	51.0918
0.914	5.28434	0.625	51.2337
0.914	5.34358	0.625	51.7579
0.914	7.10253	0.625	51.7884
0.914	7.10253	0.625	51.8246
0.914	9.05999	0.625	52.0679
0.9215	5.26685	0.625	52.1465
0.9215	19.8008	0.625	52.2826
0.9215	20.1461	0.625	52.3099
0.9215	22.454	0.625	52.399
0.9217	5.7114	0.625	52.4138
0.9217	15.039	0.625	52.4607
0.9217	15.4703	0.625	52.4609
0.9217	18.6287	0.625	52.4976
0.9217	20.0863	0.625	52.6148
0.9217	20.0957	0.625	52.6171
0.9217	20.6009	0.625	52.6201
0.9219	5.01154	0.625	52.6792
0.9219	5.38172	0.625	52.7315
0.9219	5.52519	0.625	52.7567
0.9219	6.65038	0.625	52.9605
0.9219	7.02799	0.625	52.9771
0.9219	7.02799	0.625	52.9834
0.9219	7.54176	0.625	53.016
0.9219	13.194	0.625	53.0534
0.9219	17.4531	0.625	53.1019
0.9219	20.6046	0.625	53.1168
0.9219	22.1688	0.625	53.1732
0.9219	22.767	0.625	53.2122
0.9219	23.0999	0.625	53.3961
0.922	2.04643	0.625	53.4457
0.922	5.04643	0.625	53.5451
0.922	5.04643	0.625	53.7784
0.922	5.56549	0.625	54.0322
0.922	5.64114	0.625	54.1329
0.922	6.29355	0.625	54.1416
0.922	6.52797	0.625	54.2262
0.922	6.71974	0.625	54.3578
0.922	10.2896	0.625	54.4513
0.922	13.3161	0.625	54.4572
0.922	15.6878	0.625	54.4668
0.922	15.8114	0.625	54.4755
0.922	17.5181	0.625	54.61
0.922	18.6456	0.625	54.7193
0.922	18.6866	0.625	54.7195
0.922	20.1916	0.625	54.765
0.922	20.211	0.625	54.9051
0.922	20.5955	0.625	54.9139
0.922	22.3376	0.625	54.9584
0.922	22.5764	0.625	54.9776
0.922	23.2701	0.625	55.2905
0.922	23.5625	0.625	55.4268
0.922	25.1352	0.625	55.458
0.9372	6.22479	0.625	55.5155
0.9372	6.88445	0.625	55.524
0.9372	8.42877	0.625	55.6283
0.9372	17.5523	0.625	55.7112
0.9372	19.7339	0.625	55.9616
0.9372	20.2583	0.625	55.9701
0.9375	5.69057	0.625	56.0131
0.9375	7.05969	0.625	56.0363
0.9375	7.05969	0.625	56.0508
0.9375	7.29375	0.625	56.1044
0.9375	8.5705	0.625	56.1778
0.9375	8.99827	0.625	56.2106
0.9375	9.58917	0.625	56.3558
0.9375	14.5884	0.625	56.3775
0.9375	15.0014	0.625	56.4519
0.9375	15.0139	0.625	56.5136
0.9375	15.045	0.625	56.5254
0.9375	15.254	0.625	56.5302
0.9375	15.4468	0.625	56.6861
0.9375	15.9697	0.625	56.7466
0.9375	16.0373	0.625	56.8165
0.9375	16.1754	0.625	56.8211
0.9375	16.2195	0.625	56.8469
0.9375	16.4535	0.625	56.9132
0.9375	16.4567	0.625	56.9785
0.9375	16.5236	0.625	56.9912
0.9375	16.7248	0.625	57.0153
0.9375	16.8394	0.625	57.1218
0.9375	17.2166	0.625	57.1221
0.9375	17.3352	0.625	57.161
0.9375	17.4548	0.625	57.1842
0.9375	17.4764	0.625	57.3174
0.9375	17.5967	0.625	57.3199
0.9375	17.9061	0.625	57.3239
0.9375	18.9719	0.625	57.3443
0.9375	20.3276	0.625	57.3629
0.9375	20.3883	0.625	57.4486
0.9375	20.4303	0.625	57.5195
0.9375	22.3381	0.625	57.5704
0.9375	22.375	0.625	57.6479
0.9378	5.70573	0.625	57.6485
0.9378	6.88478	0.625	57.6547
0.9378	7.1005	0.625	57.6758
0.9378	7.1005	0.625	57.6838
0.9378	8.0533	0.625	57.9378
0.9378	8.88578	0.625	58.0363
0.9378	19.8151	0.625	58.1755
1	5.18912	0.625	58.1878
1	5.30349	0.625	58.2197
1	6.48141	0.625	58.3965
1	7.10665	0.625	58.3983
1	7.10665	0.625	58.5099
1	7.17346	0.625	58.5219
1	7.17346	0.625	58.5384
1	7.38369	0.625	58.5599
1	12.5693	0.625	58.6622
1	15.9912	0.625	58.6659
1	16.2432	0.625	58.722
1	16.9901	0.625	58.7273
1	17.2697	0.625	58.8879
1	17.3352	0.625	58.8928
1	17.432	0.625	58.9266
1	18.1487	0.625	59.007
1	18.5749	0.625	59.0132
1	20.6227	0.625	59.0194
1	23.5265	0.625	59.0446
1.0155	22.5706	0.625	59.0812
1.0156	24.925	0.625	59.2957
1.0157	19.2808	0.625	59.3315
1.0158	16.538	0.625	59.3646
1.0232	5.40453	0.625	59.4062
1.0232	5.96245	0.625	59.4907
1.0232	6.65702	0.625	59.5098
1.0232	19.1988	0.625	59.5222
1.0232	23.4507	0.625	59.5551
1.0233	5.19751	0.625	59.5722
1.0234	6.01267	0.625	59.6937
1.0235	6.14671	0.625	59.9267
1.0235	16.0334	0.625	60.1215
1.0235	20.1067	0.625	60.1471
1.0235	22.6464	0.625	60.1739
1.0235	23.4542	0.625	60.5914
1.031	6.67072	0.625	60.7865
1.031	6.78578	0.625	60.843
1.031	17.6289	0.625	60.9155
1.0312	6.30957	0.625	61.1845
1.0312	6.3305	0.625	61.2609
1.0312	6.39376	0.625	61.4346
1.0312	6.70193	0.625	61.56
1.0312	15.5166	0.625	61.592
1.0312	22.0263	0.625	61.6693
1.0313	6.70193	0.625	62.12
1.0313	13.2107	0.625	62.1296
1.0313	16.8609	0.625	62.1985
1.0313	18.4736	0.625	62.2649
1.0625	6.61283	0.625	62.288
1.0625	14.3257	0.625	62.3789
1.0625	14.8019	0.625	62.6069
1.0625	15.8457	0.625	62.8447
1.0625	16.1644	0.625	62.943
1.0625	16.8896	0.625	62.9438
1.0625	17.4685	0.625	62.9587
1.0625	17.7435	0.625	63.0692
1.0625	20.9622	0.625	63.333
1.125	5.33962	0.625	63.4994
1.125	5.501	0.625	63.7002
1.125	5.62849	0.625	64.714
1.125	5.94444	0.625	64.7808
1.125	6.27583	0.625	65.2063
1.125	6.28953	0.625	65.6538
1.125	6.56662	0.625	66.5882
1.125	6.58474	0.625	66.6075
1.125	6.58929	0.625	67.05
1.125	8.36227	0.625	67.5181
1.125	8.39472	0.625	68.1109
1.125	10.0192	0.625	68.7554
1.125	10.8512	0.625	68.9083
1.125	14.0408	0.625	69.8244
1.125	14.0773	0.625	70.1276
1.125	14.7855	0.625	70.4762
1.125	15.1865	0.625	70.7444
1.125	15.3216	0.625	70.8843
1.125	15.4478	0.625	71.5878
1.125	15.8037	0.625	71.7441
1.125	15.8684	0.625	72.0125
1.125	16.1683	0.625	72.0494
1.125	16.1761	0.625	72.1267
1.125	16.8445	0.625	72.2839
1.125	17.2179	0.625	72.3726
1.125	17.236	0.625	72.8567
1.125	17.675	0.625	73.0448
1.125	18.0673	0.625	73.5298
1.125	18.2503	0.625	73.5919
1.125	18.4212	0.625	73.6342
1.125	18.8788	0.625	73.7016
1.125	18.9084	0.625	73.8948
1.125	19.2051	0.625	73.929
1.125	19.4292	0.625	73.9749
1.125	20.016	0.625	74.0756
1.125	20.1584	0.625	74.1701
1.125	20.2293	0.625	74.2793
1.125	20.337	0.625	74.329
1.125	20.5238	0.625	74.3598
1.125	20.7757	0.625	74.5074
1.125	20.8258	0.625	74.758
1.125	20.8567	0.625	74.7955
1.125	20.907	0.625	75.0329
1.125	20.9855	0.625	75.9009
1.125	21.0039	0.625	75.9322
1.125	21.0356	0.625	75.99
1.125	22.1685	0.625	76.1191
1.125	22.2064	0.625	76.1653
1.125	22.762	0.625	76.4701
1.125	22.9804	0.625	76.7354
1.125	23.3691	0.625	76.7837
1.125	23.4014	0.625	76.8711
1.125	27.3586	0.625	77.0077
1.1329	22.4372	0.625	77.107
1.1408	23.4925	0.625	77.8326
1.1562	9.29058	0.625	78.0078
1.1562	10.3853	0.625	78.8729
1.1562	10.3853	0.625	79.5493
1.1562	10.3853	0.625	79.5826
1.1562	10.3853	0.625	79.8602
1.1875	7.06061	0.625	80.4301
1.1875	7.06061	0.625	80.4501
1.1875	7.2657	0.625	80.5031
1.1875	13.4688	0.625	80.7225
1.1875	13.9275	0.625	81.1954
1.1875	14.6401	0.625	81.7198
1.1875	15.4887	0.625	82.6094
1.1875	17.0082	0.625	90.8227
1.1875	18.0099	0.625	92.8894
1.1875	18.3074	0.6872	54.9982
1.2185	5.90995	0.6872	55.3817
1.2185	5.92927	0.6872	56.8306
1.2185	14.2909	0.6875	35.0027
1.2186	18.8239	0.6875	35.7613
1.2187	5.73775	0.6875	37.7722
1.2187	20.6731	0.6875	39.6857
1.2188	5.83342	0.6875	39.907
1.2188	11.4113	0.6875	40.5836
1.2188	14.3902	0.6875	40.9303
1.219	5.26927	0.6875	41.1377
1.219	9.52345	0.6875	41.8507
1.219	11.8623	0.6875	43.4197
1.219	23.1947	0.6875	43.564
1.219	26.7709	0.6875	43.6177
1.2264	18.8267	0.6875	44.0466
1.2265	17.2865	0.6875	44.3426
1.2267	6.74394	0.6875	44.3543
1.2341	6.58929	0.6875	44.9248
1.2341	20.9186	0.6875	46.6639
1.2341	21.0526	0.6875	47.2792
1.2341	22.9673	0.6875	47.4112
1.2345	17.8305	0.6875	47.5157
1.2345	19.5029	0.6875	47.9616
1.2345	22.8432	0.6875	48.0768
1.25	5.08445	0.6875	48.3197
1.25	5.13143	0.6875	48.6439
1.25	5.24542	0.6875	48.9021
1.25	6.6941	0.6875	49.0988
1.25	6.83205	0.6875	49.1747
1.25	9.57152	0.6875	49.3074
1.25	13.9562	0.6875	49.4595
1.25	17.6614	0.6875	49.4995
1.25	17.6993	0.6875	49.5628
1.25	18.042	0.6875	49.6296
1.25	19.1338	0.6875	49.8026
1.25	20.492	0.6875	50.0185
1.25	23.6046	0.6875	50.0495
1.3122	11.2498	0.6875	50.1319
1.3125	6.28018	0.6875	50.2214
1.3125	9.72406	0.6875	50.4636
1.3125	15.9022	0.6875	50.5394
1.3125	15.9195	0.6875	51.3595
1.3125	16.8636	0.6875	51.5425
1.3125	17.0988	0.6875	52.0212
1.3125	18.2065	0.6875	52.7758
1.3125	19.0642	0.6875	53.0864
1.3125	22.7363	0.6875	53.2605
1.3128	5.39819	0.6875	53.4804
1.328	5.14608	0.6875	53.5125
1.328	5.64758	0.6875	54.8655
1.328	19.8663	0.6875	55.0874
1.328	22.5361	0.6875	56.5795
1.3281	6.82635	0.6875	56.9341
1.3281	9.10197	0.6875	58.3855
1.3283	20.6829	0.6875	59.4071
1.336	22.4415	0.6875	60.102
1.336	22.4446	0.6875	60.9229
1.3435	29.2084	0.6875	64.406
1.3437	6.28224	0.6878	57.6195
1.3437	6.63478	0.6878	58.7867
1.3437	9.97621	0.6878	58.9649
1.3437	23.2165	0.6878	92.5251
1.344	20.2497	0.703	63.5476
1.375	6.67347	0.703	66.5854
1.375	16.9561	0.703	68.2715
1.375	17.4229	0.703	68.6217
1.375	18.1918	0.7033	77.7519
1.4372	19.9892	0.7107	54.883
1.4373	5.44423	0.7107	57.4037
1.4374	20.2785	0.7109	55.2614
1.4375	5.29052	0.7109	58.6733
1.4375	5.49969	0.7109	68.0582
1.4375	5.63866	0.711	51.5241
1.4375	6.71906	0.711	52.5049
1.4375	6.90303	0.711	53.5671
1.4375	16.789	0.711	55.308
1.4375	16.8002	0.711	56.9469
1.4375	17.9231	0.711	58.0041
1.4375	18.8787	0.711	58.1768
1.4375	22.0385	0.711	58.325
1.4375	22.7538	0.711	58.587
1.4378	7.96115	0.711	58.6766
1.4378	18.5034	0.711	58.8719
1.4378	27.8205	0.711	59.2392
1.5	14.6597	0.711	59.609
1.5	16.1158	0.711	63.5847
1.5	17.5099	0.711	71.2437
1.5	18.8548	0.711	72.7893
1.531	5.1221	0.7185	30.9026
1.531	20.5462	0.7185	32.4262
1.531	23.3302	0.7185	46.4409
1.5311	6.65497	0.7185	48.8964
1.5312	5.68501	0.7185	49.583
1.5312	7.4061	0.7185	49.8345
1.5312	20.1443	0.7185	49.8411
1.5313	5.71296	0.7185	50.1807
1.5313	8.10384	0.7185	51.3418
1.5315	5.09516	0.7185	51.6184
1.5315	6.67347	0.7185	52.5814
1.539	6.56485	0.7185	53.1058
1.539	11.632	0.7185	53.1796
1.539	20.7896	0.7185	53.4243
1.5465	23.2989	0.7185	53.6704
1.5622	21.9699	0.7185	54.1446
1.5625	6.59653	0.7185	54.4853
1.5625	6.71045	0.7185	54.6468
1.5625	6.76492	0.7185	54.7865
1.5625	17.8691	0.7185	54.8773
1.5625	20.9613	0.7185	54.9117
1.625	6.28594	0.7185	55.0132
1.625	6.71045	0.7185	55.0959
1.625	10.9783	0.7185	55.1855
1.625	16.6952	0.7185	55.4544
1.625	18.0936	0.7185	55.5184
1.6327	5.14552	0.7185	55.6958
1.6329	5.41971	0.7185	55.6987
1.6405	19.4079	0.7185	55.7369
1.6407	22.7195	0.7185	55.8287
1.6563	5.70515	0.7185	55.8343
1.6565	6.61283	0.7185	55.9041
1.6565	20.9638	0.7185	56.3095
1.6875	6.88852	0.7185	56.6372
1.6875	8.21384	0.7185	56.7487
1.6875	17.0936	0.7185	57.3717
1.6875	18.742	0.7185	57.5736
1.6875	18.8125	0.7185	57.6701
1.6875	20.2115	0.7185	57.7488
1.7187	2.06144	0.7185	58.3237
1.7187	5.06144	0.7185	58.3625
1.7187	5.06144	0.7185	59.0297
1.7187	19.5627	0.7185	59.1192
1.719	6.59653	0.7185	59.1239
1.719	20.9366	0.7185	59.1909
1.719	22.4052	0.7185	59.3811
1.7345	18.0372	0.7185	60.1818
1.7421	5.09995	0.7185	60.2646
1.75	5.44013	0.7185	60.3706
1.75	6.58929	0.7185	60.5721
1.75	6.6337	0.7185	60.9943
1.75	15.7524	0.7185	61.1456
1.75	15.8218	0.7185	61.2924
1.75	15.8956	0.7185	61.3658
1.75	16.113	0.7185	62.438
1.75	18.2927	0.7185	62.7392
1.75	20.1762	0.7185	63.6281
1.75	20.6753	0.7185	63.8632
1.75	20.9223	0.7185	67.078
1.75	21.0609	0.7185	68.6728
1.75	22.0991	0.7185	69.052
1.8125	20.0158	0.7185	69.5417
1.8128	5.07252	0.7185	69.6054
1.8435	20.6959	0.7185	69.6698
1.8435	23.0504	0.7185	69.895
1.8437	9.23219	0.7185	70.6987
1.8437	9.8099	0.7185	72.8782
1.8437	10.3235	0.7185	72.9772
1.8437	10.3235	0.7185	73.7284
1.8437	10.3235	0.7185	73.7429
1.8437	10.3235	0.7185	73.9823
1.8437	12.3533	0.7185	74.3538
1.8438	22.0012	0.7185	74.7626
1.8438	22.0419	0.7185	75.0825
1.8439	5.62825	0.7185	75.6421
1.844	6.71906	0.7185	76.01
1.844	14.6824	0.7185	76.6462
1.844	20.677	0.7185	80.6134
1.875	16.5832	0.7186	49.4687
1.875	16.7008	0.7186	52.6533
1.875	17.6305	0.7186	53.152
1.9374	25.0625	0.7186	62.4365
1.9375	14.6699	0.7186	76.677
1.9378	18.3895	0.7187	49.1416
1.9378	18.7941	0.7187	49.5346
1.945	5.7771	0.7187	51.1634
1.9452	5.50384	0.7187	51.4104
1.9455	6.56485	0.7187	52.4927
1.9455	20.7895	0.7187	52.517
1.969	22.4878	0.7187	52.7801
2	10.032	0.7187	53.1033
2	18.668	0.7187	53.4336
2.0315	15.9327	0.7187	53.5747
2.0469	22.1696	0.7187	53.6654
2.0469	22.9899	0.7187	53.8321
2.047	22.9529	0.7187	53.8428
2.0625	6.79706	0.7187	54.2803
2.0625	7.40013	0.7187	54.5636
2.0625	18.5878	0.7187	54.6746
2.0628	17.9847	0.7187	54.711
2.125	7.63628	0.7187	54.7199
2.125	8.46893	0.7187	54.7256
2.125	14.0444	0.7187	54.7311
2.125	23.4795	0.7187	54.8415
2.1485	7.84426	0.7187	54.9817
2.1486	8.72562	0.7187	55.0726
2.156	20.2588	0.7187	55.0834
2.1562	5.25957	0.7187	55.4075
2.1562	19.0072	0.7187	55.6849
2.1563	16.7681	0.7187	55.7018
2.1565	22.2065	0.7187	55.7494
2.25	6.2677	0.7187	55.9234
2.25	6.44745	0.7187	55.9315
2.25	6.56654	0.7187	56.0926
2.25	14.9677	0.7187	56.1761
2.25	15.2054	0.7187	56.2279
2.25	18.7084	0.7187	56.49
2.25	19.8659	0.7187	56.4927
2.25	20.3731	0.7187	56.5667
2.25	20.8122	0.7187	56.6484
2.3438	20.2226	0.7187	56.6746
2.3594	22.5294	0.7187	56.6748
2.461	5.17721	0.7187	56.7492
2.5548	19.17	0.7187	56.9168
2.5622	5.24994	0.7187	57.0244
2.5625	12.3101	0.7187	57.0933
2.656	17.7309	0.7187	57.2822
2.664	6.12613	0.7187	57.3391
2.7655	18.7737	0.7187	57.5438
2.7656	5.98468	0.7187	57.5858
2.7657	5.22278	0.7187	57.714
2.875	12.5536	0.7187	57.7352
2.875	18.6242	0.7187	57.8352
3.125	6.55416	0.7187	57.8449
3.1565	15.8852	0.7187	58.0149
3.1719	7.00319	0.7187	58.2114
3.1719	7.00319	0.7187	58.2234
3.1719	7.00319	0.7187	58.2343
3.1878	20.3346	0.7187	58.2403
3.2734	12.4963	0.7187	58.9804
3.2735	6.01527	0.7187	59.2147
3.375	16.1543	0.7187	59.3439
3.3829	9.10702	0.7187	59.6217
3.5	8.42133	0.7187	59.6398
3.6799	6.46162	0.7187	59.8627
3.6872	7.72787	0.7187	60.0404
3.6872	11.3414	0.7187	60.2041
3.8906	6.72538	0.7187	60.2059
3.8908	5.59579	0.7187	60.3091
3.8908	5.64762	0.7187	60.4535
3.9375	6.65497	0.7187	60.5564
3.9921	5.43719	0.7187	60.676
4.0938	5.76771	0.7187	60.9036
4.0939	9.0854	0.7187	61.3409
4.1955	7.62727	0.7187	61.4374
4.297	8.45758	0.7187	61.7952
4.3049	14.6544	0.7187	62.6765
4.3984	15.5445	0.7187	63.7026
4.4063	6.56662	0.7187	63.7916
4.4063	20.8233	0.7187	64.552
4.4063	20.9833	0.7187	64.9104
4.5	5.28573	0.7187	66.2708
4.5075	5.14558	0.7187	66.3635
4.6875	7.15508	0.7187	69.5499
4.6875	7.15508	0.7187	70.4787
4.8125	2.04307	0.7187	71.7227
4.8125	5.04307	0.7187	73.6265
4.8125	5.04307	0.7187	74.8148
4.8125	5.04307	0.7187	74.9067
4.8125	5.04307	0.7187	76.0175
4.9065	18.8374	0.7187	77.2003
5	9.4058	0.7187	77.4405
5	10.4176	0.7187	81.1022
5	10.4176	0.7187	88.5617
5	10.4176	0.7187	90.14
5	10.4176	0.7188	49.3504
5.1175	19.4999	0.7188	49.5319
5.3125	19.2753	0.7188	49.642
5.9378	6.07233	0.7188	50.8032
5.9453	7.31003	0.7188	51.8583
6.031	7.21218	0.7188	52.7516
6.031	7.21218	0.7188	52.7798
6.0313	5.29333	0.7188	53.037
6.2421	5.52887	0.7188	53.2831
6.25	10.8913	0.7188	53.4258
6.25	11.6299	0.7188	53.4984
6.3438	7.52345	0.7188	53.7445
7.0703	7.33525	0.7188	54.296
7.1565	9.70797	0.7188	54.4646
7.6878	8.15925	0.7188	54.4724
7.883	13.3508	0.7188	54.4941
8.1953	5.07809	0.7188	54.8305
8.3985	6.90388	0.7188	54.8425
9.1171	6.13008	0.7188	54.9089
9.25	8.64086	0.7188	55.1284
9.8281	6.18282	0.7188	55.3485
10.4453	7.24981	0.7188	55.7249
[truncated: 3,277 more rows]

## Sheet: Figure 5
Figure 5b				Figure 5c			Figure 5d (exponential decay values normalized): waterfall plot															Figure 5e (histogram (fit parameter) (red values are excluded (unsuitable fits)))													Figure 5e						Figure 5e (histogram inset (fit parameter) (red values are excluded (unsuitable fits)))
	GFP	Rhodamine B dextran 70 kDa					number are different ROIs (individual cavities)															each row are the monoexponetial fit parameters of the EGFP fluorescence intensity. n is the summary of monoexponential decays of individual cavities.																			each row are fit parameters of the monoexponential fits of the fluorescence intensity of EGFP. n is the summary of monoexponential decays of single cavities.
time (s)	fluorescence intensity normalized	fluorescence intensity normalized			percentage (%)
0	1.01563	1.0922		rupture	1.22005		time (min)	1	2	3	4	5	6	7	8	9	10	11	12	13		Series	Fmin	Fmin err	k	k err	c	c err	Chi2	Chi2 err	Sum	average (sum/1438)			interval meanpoint	interval endpoint	count	cumulative count			Series	Fmin	Fmin err	k	k err	c	c err	Chi2	Chi2 err
40	0.9517	0.79468		GFP effluxes (DNA funnel)	40.4534		0.66667	0.92366	0.94833	0.97498	0.9492	0.96451	1	0.91474	0.94243	0.95888	0.92283	0.99335	0.95053	0.90081		Mean1	171.559	22.4008	0.000525042	2.52143e-05	171.836	22.4933	0.13702	0.13845	2.52143e-05	1.75343e-08			1.25e-05	2.5e-05	0	0			Mean8	12.7522	0.26779	0.000464397	1.90731e-05	14.8839	0.28072	0.09715	0.09807
80	0.97786	0.92858		bad control	11.8553		1.33333	1	1	0.97374	0.93109	0.98819	0.99225	0.9594	0.94063	1	0.94857	1	0.96577	0.98458		Mean2	15.0237	0.43601	0.000755853	3.32675e-05	16.6837	0.44524	0.06178	0.06243	5.84818e-05	4.06688e-08			3.75e-05	5e-05	0	0			Mean10	22.2594	0.94094	0.00136	6.18002e-05	22.4407	0.95193	0.02714	0.0274
120	1.02506	0.87649		complex kinetics	4.28708		2	0.9877	1	0.98499	0.92983	0.95483	0.97108	0.92387	1	0.97623	0.97195	0.96681	0.94064	0.99559		Mean3	15.7786	0.52138	0.001	4.74074e-05	17.9086	0.52894	0.15832	0.15998	0.000105889	7.36364e-08			6.25e-05	7.5e-05	1	1			Mean12	7.80246	0.26858	0.000467292	3.13635e-05	7.96953	0.2814	0.06351	0.0641
160	1.04076	1.05133		no signal changes	42.1841		2.66667	0.94217	0.93823	1	1	1	0.96888	0.9726	0.9486	0.98265	1	0.96181	1	1		Mean4	340.255	14.6097	0.000621726	1.0553e-05	342.114	14.6669	0.1567	0.15833	0.000116442	8.09751e-08			8.75e-05	0.0001	2	3			Mean16	17.8176	0.22915	0.000328883	1.0289e-05	17.6185	0.24764	0.0946	0.09548
200	1.0219	1.07241					3.33333	0.89414	0.93567	0.98499	0.93832	0.94296	0.93996	1	0.9247	0.96164	0.93843	0.87969	0.95892	0.9879		Mean5	53.8592	3.33044	0.000511591	2.01018e-05	54.7132	3.38724	0.21187	0.21409	0.000136544	9.49541e-08			0.0001125	0.000125	2	5			Mean18	2567.72	611.69	0.000778872	3.53715e-05	2568.59	611.8	0.03124	0.03153
240	0.98838	0.97693					4	0.95325	0.91049	0.95996	0.91656	0.93434	0.96553	0.9574	0.88836	0.93512	0.94233	0.86804	0.94293	0.92507		Mean6	30.6901	0.3917	0.0006331	1.28311e-05	32.6063	0.40252	0.13867	0.14012	0.000149375	1.03877e-07			0.0001375	0.00015	3	8			Mean20	10.6597	0.36578	0.00089757	4.9832e-05	10.7763	0.3713	0.03174	0.03204
280	1.02713	0.91988					4.66667	0.89286	0.94957	0.94995	0.87425	0.95802	0.9277	0.93401	0.91139	0.88578	0.9587	0.81077	0.96422	0.98125		Mean7	42.6565	1.66685	0.000301202	1.21367e-05	43.2545	1.80622	0.21961	0.22191	0.000161512	1.12317e-07			0.0001625	0.000175	11	19			Mean21	37.0681	3.26177	0.00104	5.63639e-05	37.8894	3.28456	0.04508	0.0455
320	1.01454	1.04514					5.33333	0.85226	0.86256	0.95249	0.85488	0.90316	0.86875	0.91374	0.88394	0.90769	0.92595	0.80831	0.94293	0.90741		Mean8	28.2404	1.0419	0.000396451	1.57104e-05	28.7642	1.1037	0.32846	0.33189	0.000177222	1.23242e-07			0.0001875	0.0002	8	27			Mean23	8.51416	0.25091	0.000404541	2.51652e-05	9.22167	0.26633	0.06275	0.06334
360	1.03029	0.79842					6	0.8399	0.88525	0.87995	0.84884	0.82133	0.89438	0.88734	0.8131	0.8766	0.89478	0.69628	0.90031	0.9195		Mean9	24.0902	0.84033	0.000416778	1.68908e-05	24.7673	0.89076	0.29933	0.30246	0.000194113	1.34988e-07			0.0002125	0.000225	14	41			Mean24	13.4349	0.25976	0.000435534	1.70311e-05	13.8526	0.27383	0.0736	0.07429
400	1.0261	1.02406					6.66667	0.84733	0.84616	0.91375	0.84645	0.83426	0.89102	0.85181	0.83346	0.86291	0.88388	0.75105	0.89576	0.87215		Mean10	25.887	0.83944	0.000429765	1.60496e-05	26.2454	0.8869	0.27426	0.27712	0.000210163	1.46149e-07			0.0002375	0.00025	23	64			Mean25	46.9075	0.74921	0.000390385	8.02524e-06	46.8187	0.81642	0.20761	0.20955
440	1.0261	1.00916					7.33333	0.77714	0.83357	0.86123	0.85123	0.79334	0.84654	0.87414	0.79007	0.76965	0.88777	0.65145	0.91401	0.88207		Mean11	77.3055	5.92417	0.000473446	1.94829e-05	77.9744	6.00286	0.13731	0.13875	0.000229646	1.59698e-07			0.0002625	0.000275	14	78			Mean28	14.1644	0.26888	0.000468393	1.73168e-05	15.1212	0.28166	0.04755	0.04799
480	1.00511	0.78849					8	0.78822	0.79574	0.82372	0.76302	0.79765	0.81762	0.85688	0.72453	0.85925	0.83399	0.63069	0.91096	0.89198		Mean13	20.4453	0.53208	0.00103	3.82949e-05	23.193	0.53951	0.25945	0.26216	0.00026794	1.86329e-07			0.0002875	0.0003	30	108			Mean29	70.4112	0.63728	0.000185937	5.21631e-06	67.5805	1.01567	0.29164	0.29438
520	0.93279	0.97693					8.66667	0.74262	0.80203	0.77498	0.75572	0.78578	0.82427	0.85075	0.71389	0.78064	0.84801	0.60497	0.86074	0.8534		Mean14	27.1131	0.53957	0.00106	2.97966e-05	28.3356	0.54692	0.08116	0.08201	0.000297737	2.07049e-07			0.0003125	0.000325	38	146			Mean30	28.9872	0.32764	0.000425435	8.81866e-06	29.6917	0.35453	0.21596	0.21799
560	1.00827	1.07112					9.33333	0.72911	0.84997	0.76997	0.80049	0.718	0.82647	0.81422	0.7564	0.81994	0.87606	0.6133	0.86529	0.91182		Mean15	19.7708	0.3763	0.000591681	1.82544e-05	21.4056	0.38788	0.11621	0.11742	0.000315991	2.19744e-07			0.0003375	0.00035	79	225			Mean31	15.629	0.28293	0.00052116	1.75168e-05	16.3445	0.29397	0.06776	0.0684
600	1.00827	1.00542					10	0.72783	0.81082	0.80247	0.77144	0.73524	0.84538	0.85989	0.73779	0.77422	0.85737	0.57015	0.88357	0.92616		Mean17	33.1119	2.08659	0.000514308	2.4424e-05	33.7186	2.13544	0.17163	0.17343	0.000340415	2.36728e-07			0.0003625	0.000375	87	312			Mean33	11.9757	0.33932	0.000764386	3.59887e-05	12.3668	0.34598	0.02863	0.0289
640	0.9674	1.1604					10.6667	0.73647	0.79698	0.81625	0.77144	0.70831	0.83653	0.89241	0.75286	0.81262	0.84254	0.56846	0.87673	0.85558		Mean18	20.4347	1.46743	0.000518784	3.22914e-05	21.0428	1.51015	0.08895	0.08988	0.000372707	2.59184e-07			0.0003875	0.0004	116	428			Mean35	6.70196	0.35563	0.000844966	7.32019e-05	6.95446	0.36155	0.01753	0.0177
680	0.94331	1.00542					11.3333	0.71182	0.76295	0.78876	0.74849	0.70294	0.7887	0.77362	0.72808	0.85284	0.85036	0.55767	0.8364	0.88648		Mean19	209.212	25.0889	0.000542717	2.31264e-05	209.625	25.1771	0.17035	0.17213	0.000395833	2.75266e-07			0.0004125	0.000425	139	567			Mean37	121.511	3.55933	0.00132	2.35522e-05	122.55	3.57745	0.34796	0.35122
720	1.05754	1.06493					12	0.70074	0.78184	0.7662	0.65537	0.71156	0.81426	0.81929	0.70325	0.83092	0.80282	0.52863	0.82726	0.86441		Mean20	16.5749	0.41748	0.000703933	2.73581e-05	18.0191	0.42728	0.10301	0.10408	0.000423191	2.94292e-07			0.0004375	0.00045	116	683			Mean40	8.09749	0.3725	0.000933417	6.91045e-05	8.38794	0.37778	0.01415	0.01428
760	1.01247	1.04881					12.6667	0.71675	0.7478	0.7662	0.70976	0.70182	0.82537	0.85889	0.68289	0.78249	0.79735	0.50291	0.86454	0.84125		Mean21	38.8157	2.26986	0.000451356	1.98318e-05	39.6572	2.3341	0.23486	0.23731	0.000443023	3.08083e-07			0.0004625	0.000475	125	808			Mean41	856.322	134.985	0.000597323	2.42888e-05	856.792	135.143	0.09447	0.09536
800	1.03656	0.90499					13.3333	0.66135	0.77554	0.795	0.72674	0.69757	0.84538	0.78682	0.67225	0.7861	0.8106	0.49959	0.89192	0.85116		Mean22	52.9034	2.9202	0.000454785	1.71767e-05	53.3217	2.98892	0.27923	0.28215	0.0004602	3.20028e-07			0.0004875	0.0005	93	901			Mean42	58.6671	1.17405	0.000543802	1.02493e-05	58.8413	1.21686	0.08768	0.0885
840	0.98522	0.98931					14	0.7131	0.76544	0.72246	0.71102	0.67064	0.7887	0.80609	0.6758	0.79984	0.76383	0.49044	0.81737	0.78833		Mean23	26.133	1.19968	0.000458775	2.03526e-05	26.6599	1.24903	0.19289	0.1949	0.000480552	3.34181e-07			0.0005125	0.000525	113	1014			Mean44	79.6229	0.60145	0.000176847	4.65853e-06	74.2568	1.01915	0.24518	0.24748
880	0.98522	0.94347					14.6667	0.64041	0.77679	0.70374	0.71586	0.64803	0.77534	0.79089	0.64213	0.77697	0.75759	0.45644	0.83181	0.83133		Mean24	11.3264	0.41253	0.000690219	3.89864e-05	13.4585	0.42251	0.13448	0.13588	0.000519539	3.61293e-07			0.0005375	0.00055	87	1101			Mean47	36.5305	0.95018	0.00043975	1.25478e-05	36.7833	1.00909	0.06573	0.06635
920	0.98522	1.03888					15.3333	0.63798	0.72256	0.74001	0.63116	0.62648	0.76643	0.79189	0.60939	0.79437	0.78098	0.42239	0.81507	0.79933		Mean26	5.42848	0.3269	0.000464219	4.97486e-05	7.83669	0.34219	0.09651	0.09752	0.000569287	3.95888e-07			0.0005625	0.000575	67	1168			Mean49	25.9651	0.23745	0.000358166	7.4895e-06	25.8315	0.25493	0.27878	0.28139
960	0.97999	0.95463					16	0.69337	0.7478	0.69249	0.67593	0.65877	0.77308	0.77463	0.59345	0.74499	0.75994	0.41328	0.79987	0.81481		Mean27	17.6839	0.52581	0.00102	4.31124e-05	20.4587	0.53332	0.31642	0.31973	0.0006124	4.25869e-07			0.0005875	0.0006	66	1234			Mean50	32.521	0.32381	0.000233284	6.79782e-06	32.4755	0.43386	0.44985	0.45407
1000	0.92026	1.03269					16.6667	0.66507	0.71626	0.71251	0.64569	0.60929	0.77198	0.77362	0.58369	0.76143	0.74746	0.41579	0.84855	0.85558		Mean28	17.2168	0.4476	0.00078867	3.07946e-05	18.4993	0.45651	0.0713	0.07204	0.000643194	4.47284e-07			0.0006125	0.000625	41	1275			Mean52	10.9258	0.21541	0.000248293	1.45823e-05	13.2877	0.22735	0.08878	0.08962
1040	1.01454	0.86289					17.3333	0.67121	0.70997	0.69373	0.6433	0.6717	0.74086	0.77157	0.61114	0.72122	0.79423	0.38424	0.82651	0.8104		Mean29	110.924	9.19142	0.000287356	1.51598e-05	109.013	9.53408	0.27611	0.27899	0.000658354	4.57826e-07			0.0006375	0.00065	36	1311			Mean54	37.0517	0.51638	0.000230257	7.82975e-06	36.0563	0.70103	0.14465	0.14601
1080	0.97476	1.12443					18	0.66507	0.71502	0.69873	0.63116	0.59312	0.7297	0.79495	0.59433	0.73857	0.74827	0.38756	0.82801	0.75525		Mean31	33.3142	0.34655	0.000159021	6.88232e-06	32.0171	0.54317	0.39069	0.39477	0.000665237	4.62612e-07			0.0006625	0.000675	45	1356			Mean60	6.57383	0.41064	0.00115	0.000113455	7.53644	0.41486	0.02245	0.02266
1120	1.0177	0.88397					18.6667	0.66135	0.79443	0.67624	0.62997	0.60605	0.76197	0.78682	0.53943	0.72122	0.728	0.37595	0.78614	0.80599		Mean32	100.145	16.7543	0.000705203	4.45298e-05	101.024	16.8012	0.08174	0.08259	0.000709766	4.93579e-07			0.0006875	0.0007	26	1382			Mean67	18.3779	0.21757	0.00027906	9.09746e-06	18.1118	0.23512	0.23087	0.23304
1160	1.00304	1.08975					19.3333	0.62933	0.68223	0.62996	0.63846	0.57587	0.70523	0.72389	0.55181	0.74865	0.7537	0.34855	0.85235	0.77841		Mean33	22.5802	0.26643	0.000320694	8.42987e-06	22.3966	0.28998	0.93119	0.94092	0.000718196	4.99441e-07			0.0007125	0.000725	27	1409			Mean68	36.718	0.61954	0.000119363	6.54563e-06	33.9452	0.41855	0.20585	0.20778
1200	0.98102	1.06867					20	0.62318	0.66964	0.61124	0.59972	0.55651	0.70523	0.73097	0.56863	0.72944	0.70462	0.32948	0.7679	0.74974		Mean35	25.1723	3.65631	0.000588535	5.15514e-05	25.7854	3.7017	0.04566	0.04613	0.000769748	5.3529e-07			0.0007375	0.00075	32	1441			Mean69	7790.55	5685.37	0.00253	0.000256191	7791.05	5685.39	0.01161	0.01172
1240	0.99149	1.10213					20.6667	0.63548	0.67089	0.59747	0.59853	0.55975	0.71749	0.73403	0.53054	0.72488	0.73031	0.32616	0.80977	0.76408		Mean36	20.2297	2.46844	0.000648943	5.47452e-05	21.18	2.50354	0.03834	0.03874	0.000824493	5.73361e-07			0.0007625	0.000775	25	1466			Mean70	15.9613	0.29289	0.000560339	1.85699e-05	16.489	0.30288	0.11452	0.1156
1280	0.96217	0.96081					21.3333	0.59116	0.69607	0.62125	0.58526	0.5382	0.73305	0.76549	0.51018	0.66546	0.69213	0.31122	0.81127	0.75966		Mean37	42.9214	1.93913	0.00111	3.9302e-05	44.6878	1.95631	0.11892	0.12016	0.000863795	6.00692e-07			0.0007875	0.0008	25	1491			Mean71	14.3667	0.231	0.000335568	1.29305e-05	15.0033	0.24931	0.06131	0.06188
1320	1.02506	0.98312					22	0.66013	0.64184	0.57998	0.59249	0.53177	0.67521	0.71677	0.52524	0.6801	0.71394	0.3278	0.7679	0.75748		Mean38	33.0046	5.59884	0.000745016	6.5398e-05	33.7784	5.63366	0.03642	0.0368	0.000929193	6.4617e-07			0.0008125	0.000825	21	1512			Mean74	59.1515	1.18727	0.000484882	9.38095e-06	58.8793	1.24065	0.40524	0.40904
1360	0.92652	0.93599					22.6667	0.60102	0.68348	0.58876	0.54049	0.56944	0.6652	0.73303	0.49245	0.68191	0.7015	0.29875	0.76105	0.77067		Mean40	13.5715	0.40741	0.000452499	2.18362e-05	14.0748	0.43156	0.12022	0.12148	0.000951029	6.61355e-07			0.0008375	0.00085	11	1523			Mean76	13.12	0.31964	0.000673462	2.80381e-05	13.3515	0.32745	0.0625	0.06308
1400	0.99149	1.00665					23.3333	0.58252	0.58892	0.55996	0.56105	0.49516	0.62627	0.69238	0.48715	0.63804	0.6711	0.27968	0.77245	0.72882		Mean41	27.7198	2.21582	0.000556105	3.23774e-05	28.2501	2.25928	0.08298	0.08385	0.000983406	6.83871e-07			0.0008625	0.000875	15	1538			Mean77	295.027	140.77	0.00124	0.000138433	295.908	140.801	0.02021	0.0204
1440	0.97367	0.93851					24	0.52462	0.64564	0.54748	0.49579	0.5199	0.65294	0.71777	0.44376	0.62891	0.64848	0.28132	0.78009	0.68467		Mean42	9.18889	0.3049	0.000410523	2.58003e-05	10.4401	0.32269	0.06515	0.06583	0.00101	7.01813e-07			0.0008875	0.0009	11	1549			Mean80	14.2391	0.24943	0.000399419	1.48854e-05	14.4473	0.26508	0.06805	0.06869
1480	1.01144	0.87649					24.6667	0.57022	0.62675	0.59246	0.5381	0.52208	0.65855	0.69544	0.44551	0.60695	0.68042	0.2531	0.7694	0.71999		Mean43	60.8723	5.81866	0.000588977	2.91286e-05	61.699	5.86958	0.10289	0.10396	0.00104	7.22069e-07			0.0009125	0.000925	13	1562			Mean81	10.5169	0.2419	0.000373482	1.90859e-05	11.1591	0.25871	0.06133	0.0619
1520	0.98102	0.94966					25.3333	0.57637	0.6242	0.53247	0.53565	0.50053	0.67521	0.69037	0.45703	0.64079	0.69991	0.26807	0.7694	0.72216		Mean45	14.3286	0.47105	0.000855901	4.15232e-05	16.8847	0.47944	0.21508	0.21733	0.00108	7.50945e-07			0.0009375	0.00095	6	1568			Mean84	-2.40774e-07	?	9.28232e-13	?	30.7316	0.14341	208.082	210.033
1560	0.97895	0.92362					26	0.57759	0.57882	0.51752	0.47642	0.49947	0.64409	0.65384	0.45081	0.65082	0.68042	0.23571	0.74506	0.71884		Mean46	44.3032	1.02163	0.000733534	1.69501e-05	46.0475	1.04336	0.15767	0.15931	0.0011	7.62732e-07			0.0009625	0.000975	7	1575			Mean87	8.3396	0.26693	0.000461261	2.89725e-05	10.0028	0.27997	0.10421	0.10519
1600	1.01667	0.86411					26.6667	0.56651	0.64184	0.53247	0.47642	0.48766	0.65074	0.65178	0.4358	0.59692	0.63758	0.21163	0.73746	0.73208		Mean47	23.4223	0.43826	0.000762196	2.15867e-05	24.8305	0.44742	0.15637	0.158	0.00112	7.77744e-07			0.0009875	0.001	5	1580			Mean90	67.212	1.33685	0.000220884	7.57643e-06	67.2998	1.69892	0.17232	0.17394
1640	0.98942	0.98686					27.3333	0.52097	0.58007	0.52746	0.49214	0.45749	0.61627	0.64977	0.42161	0.61427	0.66486	0.22241	0.6971	0.67808		Mean48	13.8394	0.44689	0.000507258	2.46745e-05	14.82	0.46826	0.13323	0.13462	0.00114	7.94902e-07			0.00101	0.00103	9	1589			Mean91	9.3054	0.60739	0.000898746	7.3806e-05	11.5955	0.62076	0.04117	0.04156
1680	1.04076	0.98557					28	0.52955	0.60407	0.46877	0.44253	0.4295	0.56953	0.63452	0.39591	0.61151	0.60017	0.21245	0.71463	0.65715		Mean50	58.4211	0.56466	0.000449751	5.96495e-06	59.6871	0.5986	0.47037	0.47529	0.00115	7.99051e-07			0.00104	0.00105	10	1599			Mean92	18.2471	0.21697	0.000275165	9.10281e-06	18.0446	0.23414	0.13499	0.13625
1720	1.03449	0.97693					28.6667	0.51604	0.56623	0.45746	0.44618	0.46073	0.61291	0.59698	0.4287	0.53931	0.62044	0.21659	0.70169	0.69573		Mean51	51.0052	2.62667	0.000448684	1.64836e-05	51.7829	2.69491	0.25597	0.25864	0.00117	8.10513e-07			0.00106	0.00108	8	1607			Mean94	36.1972	0.31292	0.000399309	6.64201e-06	36.2361	0.34188	0.43629	0.44038
1760	1.00304	0.97571					29.3333	0.51969	0.53849	0.44498	0.44618	0.43812	0.56178	0.62538	0.41185	0.58409	0.61496	0.19419	0.70244	0.66483		Mean52	28.865	1.29922	0.00036672	1.66882e-05	29.5799	1.37931	0.18885	0.19083	0.00118	8.22119e-07			0.00109	0.0011	3	1610			Mean96	19.5429	1.02762	0.000395452	2.31307e-05	20.7867	1.104	0.06057	0.06114
1800	1.04392	0.97197					30	0.47045	0.57882	0.50621	0.46919	0.43168	0.53505	0.56446	0.36491	0.56398	0.60171	0.18176	0.65907	0.65382		Mean55	5.68832	0.27208	0.000333719	3.45258e-05	7.46695	0.29472	0.19362	0.19564	0.00122	8.46128e-07			0.00111	0.00113	2	1612			Mean97	4.92778	0.34723	0.000802858	9.31544e-05	6.05197	0.35351	0.03624	0.03658
1840	0.99672	1.05004					30.6667	0.48274	0.52964	0.43874	0.41354	0.37571	0.6029	0.59899	0.36224	0.54021	0.58923	0.18008	0.65907	0.61851		Mean58	26.1084	0.93492	0.000496391	1.88751e-05	26.7862	0.97321	0.21766	0.21993	0.00124	8.59254e-07			0.00114	0.00115	1	1613			Mean98	17.3014	0.25621	0.000423012	1.28783e-05	19.859	0.27081	0.34348	0.3467
1880	1.0062	1.22732					31.3333	0.45815	0.54728	0.43497	0.42807	0.41444	0.56398	0.58479	0.39149	0.55576	0.59936	0.16183	0.65222	0.63725		Mean59	49.0034	2.86682	0.000562081	2.17249e-05	49.8054	2.9128	0.15847	0.16012	0.00126	8.74362e-07			0.00116	0.00118	4	1617			Mean101	16.7467	0.30343	0.0006035	1.92664e-05	18.3273	0.31246	0.07119	0.07186
1920	1.04076	1.0922					32	0.47045	0.52584	0.42626	0.39902	0.39076	0.57288	0.57465	0.36137	0.53109	0.54716	0.1809	0.65527	0.61633		Mean60	11.4031	0.5992	0.000522271	3.56736e-05	11.9512	0.62601	0.06016	0.06079	0.00129	8.9917e-07			0.00119	0.0012	3	1620			Mean102	16.1749	0.21641	0.000270986	1.01983e-05	16.1098	0.23308	0.11734	0.11844
1960	0.97476	0.94592					32.6667	0.47787	0.48931	0.42626	0.37607	0.38858	0.54616	0.55232	0.34456	0.50366	0.52377	0.15768	0.61949	0.6505		Mean61	37.6712	0.30853	0.000419244	6.4292e-06	40.0192	0.32586	0.21886	0.22114	0.0013	9.03641e-07			0.00121	0.00123	5	1625			Mean104	6.29893	0.23534	0.000350836	3.04134e-05	6.4038	0.25311	0.03298	0.03329
2000	1.07117	1.06615					33.3333	0.46058	0.49685	0.38876	0.33375	0.37459	0.51278	0.53606	0.34543	0.49363	0.55652	0.14521	0.59816	0.62734		Mean62	4.69158	0.34468	0.000364285	4.9959e-05	6.65471	0.37576	0.10015	0.10119	0.00135	9.38383e-07			0.00124	0.00125	2	1627			Mean105	10.7224	0.31713	0.000662348	3.36185e-05	10.8373	0.32511	0.04245	0.04285
2040	1.05962	0.95463					34	0.4212	0.4779	0.37621	0.36758	0.38427	0.54396	0.50966	0.34101	0.49634	0.51676	0.14275	0.59896	0.58875		Mean63	36.6995	0.29597	0.000155165	4.19792e-06	33.5748	0.2617	0.62802	0.63458	0.00135	9.41302e-07			0.00126	0.00128	2	1629			Mean106	52.3459	1.77234	0.000690503	1.80536e-05	53.5803	1.80557	0.36358	0.36699
2080	1.05962	0.8616					34.6667	0.41383	0.45521	0.37998	0.34821	0.3574	0.53286	0.50966	0.31798	0.49453	0.50116	0.15686	0.57533	0.57665		Mean64	590.925	140.81	0.000638257	3.71655e-05	591.731	140.905	0.10406	0.10515	0.00139	9.67147e-07			0.00129	0.0013	0	1629			Mean108	26.6646	0.42985	0.000605958	1.45093e-05	26.8878	0.44804	0.12557	0.12675
2120	1.05542	0.9211					35.3333	0.45443	0.44767	0.37751	0.35306	0.37246	0.50503	0.50253	0.31356	0.48631	0.50428	0.12946	0.58981	0.60308		Mean65	38.1967	0.49212	0.000917041	1.71942e-05	40.2237	0.50012	0.18727	0.18923	0.00141	9.79104e-07			0.00131	0.00133	1	1630			Mean109	14.8442	0.24251	0.000375602	1.3582e-05	15.3002	0.25924	0.07069	0.07135
2160	1.03236	0.8616					36	0.39904	0.45272	0.35626	0.32646	0.3466	0.51168	0.48633	0.32507	0.447	0.48324	0.12118	0.57687	0.53474		Mean67	58.7755	4.46344	0.00049456	2.17856e-05	59.7155	4.52949	0.17415	0.17597	0.00143	9.94254e-07			0.00134	0.00135	0	1630			Mean110	73.4595	3.86601	0.000457901	1.53022e-05	74.3306	3.95795	0.05128	0.05176
2200	0.99045	0.97442					36.6667	0.39289	0.43633	0.36627	0.33375	0.35628	0.49612	0.50866	0.30734	0.43421	0.46922	0.122	0.52665	0.54575		Mean69	20.3272	0.38639	0.000423036	1.34863e-05	20.6237	0.41246	0.35615	0.35988	0.00144	1.00363e-06			0.00136	0.00138	1	1631			Mean112	9.17873	0.31461	0.000651275	3.84787e-05	10.7805	0.32277	0.07154	0.07221
2240	0.98522	1.11824					37.3333	0.39039	0.44138	0.33123	0.34098	0.3283	0.47166	0.44267	0.28611	0.43602	0.48636	0.11535	0.54185	0.58875		Mean70	36.8373	0.40521	0.000670013	1.15197e-05	39.1707	0.41546	0.30126	0.30441	0.00145	1.01164e-06			0.00139	0.0014	1	1632			Mean114	18.7323	0.50474	0.000289525	1.4897e-05	19.1662	0.60827	0.08191	0.08267
2280	0.99149	1.20875					38	0.37067	0.43003	0.37875	0.32526	0.31861	0.48722	0.44367	0.29495	0.43326	0.46221	0.11617	0.56393	0.54357		Mean71	51.0765	2.77321	0.000460735	1.73703e-05	51.5638	2.83905	0.29689	0.3	0.00147	1.02372e-06			0.00141	0.00143	2	1634			Mean115	7.00135	0.22015	0.000292708	2.44561e-05	7.14264	0.23856	0.03604	0.03638
2320	0.99569	0.98189					38.6667	0.39039	0.45148	0.32499	0.30106	0.30999	0.43602	0.43454	0.29316	0.45247	0.48089	0.10952	0.52891	0.52815		Mean72	15.886	0.29915	0.000396801	1.44289e-05	16.276	0.3177	0.28018	0.28311	0.00149	1.03376e-06			0.00144	0.00145	1	1635			Mean118	8.19101	0.28866	0.000543526	3.49826e-05	8.82258	0.29908	0.02938	0.02965
2360	0.97786	1.30423					39.3333	0.38918	0.41613	0.33377	0.29986	0.3068	0.46055	0.41627	0.28786	0.40769	0.47858	0.10124	0.53275	0.58107		Mean73	487.958	86.8574	0.000606835	2.90581e-05	489.364	86.9526	0.11333	0.11452	0.00152	1.05396e-06			0.00146	0.00148	1	1636			Mean120	23.1195	0.66703	0.000989486	3.46305e-05	23.4605	0.67969	0.03298	0.03329
2400	1.01144	0.96578					40	0.37688	0.40354	0.34124	0.31558	0.29174	0.46055	0.40714	0.2985	0.39947	0.46922	0.10624	0.50607	0.52815		Mean74	16.5348	0.45683	0.000278842	1.47861e-05	16.831	0.5373	0.1547	0.15632	0.00153	1.06425e-06			0.00149	0.0015	1	1637			Mean123	5.96104	0.29353	0.000562931	4.99808e-05	6.63274	0.30346	0.02579	0.02604
2440	1.02397	0.99801					40.6667	0.34729	0.39593	0.31752	0.30106	0.27881	0.43718	0.41627	0.28077	0.39305	0.46298	0.09459	0.51826	0.52483		Mean75	98.2365	14.4581	0.000619728	3.61685e-05	98.8384	14.5156	0.07843	0.07925	0.00157	1.0894e-06			0.00151	0.00153	0	1637			Mean124	23.4977	1.22023	0.000493196	2.42832e-05	23.7309	1.27244	0.03618	0.03652
2480	1.05231	1.06248					41.3333	0.35837	0.39849	0.32376	0.31558	0.31648	0.44273	0.46906	0.2967	0.39856	0.44737	0.10456	0.52131	0.52374		Mean76	27.2107	0.27371	0.000337489	7.28363e-06	27.1096	0.29609	0.72969	0.73732	0.00157	1.09446e-06			0.00154	0.00155	1	1638			Mean127	1477.76	294.414	0.000867081	3.59535e-05	1478.73	294.481	0.03402	0.03434
2520	1.08267	0.95707					42	0.38053	0.42118	0.32252	0.26239	0.28419	0.4683	0.42947	0.28698	0.42048	0.42168	0.10456	0.52361	0.51049		Mean77	15.1453	0.61362	0.000534016	2.77358e-05	15.837	0.63984	0.05796	0.05856	0.0016	1.11375e-06			0.00156	0.00158	0	1638			Mean128	19.2071	0.32039	0.000676792	1.92684e-05	21.9113	0.32815	0.12312	0.12427
2560	0.98729	1.09968					42.6667	0.41748	0.39593	0.28872	0.29144	0.26157	0.44939	0.43454	0.31443	0.38302	0.44737	0.08881	0.48554	0.54134		Mean78	22.0524	0.95538	0.000504051	2.29062e-05	22.7821	0.99303	0.1393	0.14075	0.00162	1.12968e-06			0.00159	0.0016	0	1638			Mean129	9.38679	0.33309	0.000734851	4.36762e-05	9.96313	0.34008	0.03317	0.03349
2600	0.99988	1.04514					43.3333	0.35959	0.39974	0.34248	0.26358	0.26801	0.42827	0.38987	0.2675	0.37385	0.40996	0.07138	0.51296	0.51049		Mean79	16.3559	0.38329	0.000418683	1.6568e-05	17.0311	0.40967	0.23411	0.23656	0.00164	1.1412e-06			0.00161	0.00163	0	1638			Mean131	31.0502	0.34812	0.000461828	8.96907e-06	31.2009	0.37253	0.17418	0.17581
2640	0.97579	1.00794					44	0.37317	0.41108	0.30497	0.26723	0.27557	0.45384	0.38882	0.26571	0.37846	0.42091	0.08216	0.50077	0.52815		Mean81	16.7951	0.44833	0.000790774	3.16853e-05	18.3262	0.45723	0.10903	0.11017	0.00167	1.16324e-06			0.00164	0.00165	1	1639			Mean133	20.642	0.30398	0.000383467	1.12253e-05	21.5469	0.33434	0.15096	0.15238
2680	0.93699	1.00542					44.6667	0.38918	0.3657	0.30497	0.27088	0.27232	0.41491	0.39595	0.25244	0.3766	0.42091	0.08713	0.49317	0.47517		Mean82	26.4857	0.48487	0.000895935	2.398e-05	29.0008	0.493	0.2452	0.24776	0.0017	1.17991e-06			0.00166	0.00168	0	1639			Mean135	6.30807	0.32936	0.000717534	6.30748e-05	8.05374	0.33656	0.0363	0.03664
2720	0.97056	1.00046					45.3333	0.38181	0.40479	0.28625	0.23579	0.27988	0.45049	0.38987	0.27547	0.38392	0.3944	0.09295	0.47414	0.5094		Mean83	19.2683	0.6426	0.000557201	2.32112e-05	20.0008	0.66779	0.09389	0.09487	0.00172	1.19605e-06			0.00169	0.0017	1	1640			Mean136	35.8975	0.23931	0.000364579	5.48928e-06	35.2412	0.25652	1.12465	1.13519
2760	0.94642	0.89512					46	0.30663	0.3657	0.28125	0.21039	0.25295	0.36372	0.39088	0.25332	0.3565	0.37956	0.07634	0.49923	0.48624		Mean85	13.0987	0.46867	0.000537044	2.80999e-05	15.5961	0.48886	0.15185	0.15344	0.00175	1.21559e-06			0.00171	0.00173	0	1640			Mean137	114.257	2.4712	0.00029447	6.28627e-06	113.791	2.6993	0.22094	0.22301
2800	0.95584	0.97693					46.6667	0.36945	0.35941	0.29496	0.23214	0.23577	0.38825	0.36348	0.23296	0.34552	0.39906	0.07388	0.42847	0.50275		Mean86	15.3285	0.39075	0.000429155	1.81772e-05	15.9268	0.41639	0.1119	0.11307	0.00177	1.22824e-06			0.00174	0.00175	1	1641			Mean141	39.2805	0.36943	0.000212344	6.27972e-06	38.667	0.53395	0.17275	0.17437
2840	0.98838	1.00794					47.3333	0.33378	0.37325	0.25876	0.23579	0.25726	0.41937	0.34722	0.25419	0.35008	0.37413	0.08549	0.43152	0.48733		Mean87	26.7086	0.53669	0.00105	2.98871e-05	28.1185	0.54407	0.1462	0.14773	0.0018	1.24902e-06			0.00176	0.00178	2	1643			Mean144	14.9833	0.3593	0.00086376	3.3701e-05	16.132	0.36507	0.04705	0.0475
2880	0.96843	1.08227					48	0.33128	0.37325	0.26747	0.20919	0.2379	0.35371	0.34621	0.22674	0.33363	0.37024	0.06223	0.42162	0.49507		Mean89	20.8822	0.45196	0.000514216	1.66441e-05	22.5888	0.47303	0.20374	0.20587	0.00181	1.26059e-06			0.00179	0.0018	0	1643			Mean145	16.6925	0.26602	0.000457955	1.43741e-05	18.3266	0.27919	0.1969	0.19875
2920	1.03553	1.23228					48.6667	0.36452	0.35561	0.27247	0.23095	0.25295	0.38044	0.34722	0.24622	0.35103	0.35853	0.07138	0.44901	0.5094		Mean90	36.0019	0.42769	0.000732437	1.32947e-05	38.3236	0.43716	0.22482	0.22717	0.00183	1.26984e-06			0.00181	0.00183	2	1645			Mean146	41.1288	1.00379	0.000479179	1.21598e-05	40.911	1.05465	0.25014	0.25248
2960	0.94118	1.09471					49.3333	0.37067	0.37456	0.26877	0.21768	0.25726	0.38935	0.33909	0.25686	0.3565	0.37024	0.0589	0.40793	0.49392		Mean91	22.334	0.3385	0.000355571	1.02546e-05	22.6512	0.37047	0.61272	0.61913	0.00184	1.27697e-06			0.00184	0.00185	1	1646			Mean148	57.2689	1.08006	0.00036837	7.87337e-06	56.4104	1.17143	0.8218	0.82951
3000	0.9517	0.85174					50	0.34729	0.33036	0.26376	0.20674	0.24652	0.38599	0.35836	0.24268	0.36928	0.36165	0.06969	0.44976	0.45425		Mean92	68.8568	5.59149	0.000499831	2.18713e-05	69.4633	5.66048	0.15857	0.16023	0.00186	1.29218e-06			0.00186	0.00188	0	1646			Mean152	154.625	11.6065	0.000493935	1.67216e-05	156.053	11.7185	0.05212	0.0526
3040	0.95377	0.82318					50.6667	0.36824	0.30898	0.26623	0.21523	0.25189	0.406	0.34009	0.23204	0.34095	0.35699	0.06059	0.40184	0.48515		Mean93	14.9151	0.36817	0.000570111	2.30907e-05	15.49	0.38022	0.08134	0.08219	0.00188	1.30824e-06			0.00189	0.0019	0	1646			Mean154	9.82626	0.48931	0.00171	0.000131253	10.9076	0.49218	0.03592	0.03626
3080	0.96424	0.9583					51.3333	0.36452	0.31902	0.27124	0.19347	0.23034	0.3949	0.31676	0.25064	0.34095	0.35618	0.06391	0.38814	0.46199		Mean94	22.0211	0.36014	0.000386087	1.12808e-05	22.1989	0.38915	0.48752	0.49262	0.00189	1.31608e-06			0.00191	0.00193	0	1646			Mean162	7.03079	0.36605	0.00089896	7.57075e-05	7.79815	0.37156	0.02853	0.02879
3120	0.95061	1.07241					52	0.31899	0.32033	0.22996	0.20674	0.2239	0.36817	0.33096	0.22941	0.35193	0.37178	0.06059	0.39194	0.41784		Mean95	55.8253	3.22397	0.000427781	1.66548e-05	56.5501	3.30465	0.14447	0.14598	0.00191	1.32766e-06			0.00194	0.00195	0	1646			Mean163	7.48344	0.33537	0.000745609	5.58003e-05	7.76081	0.34224	0.02381	0.02403
3160	1.03345	0.94715					52.6667	0.32635	0.33167	0.265	0.21039	0.22603	0.35371	0.31269	0.24268	0.32451	0.35075	0.05144	0.39879	0.46417		Mean96	13.6496	0.32699	0.000464449	1.9796e-05	13.9972	0.34227	0.12889	0.13024	0.00193	1.34143e-06			0.00196	0.00198	1	1647			Mean166	45.2562	0.71857	0.000280854	7.4656e-06	46.8005	0.85838	0.2572	0.25961
3200	1.00827	0.85664					53.3333	0.34115	0.30013	0.22002	0.1753	0.23359	0.38489	0.31876	0.20993	0.33092	0.33514	0.05476	0.34778	0.41784		Mean97	18.0017	0.27936	0.000350508	1.1364e-05	18.0695	0.30083	0.5068	0.5121	0.00194	1.34933e-06			0.00199	0.002	0	1647			Mean167	-2.99307e-07	?	1.08472e-13	?	26.6609	0.14134	381.999	385.581
3240	0.95797	1.0178					54	0.30663	0.32282	0.22502	0.20435	0.21528	0.3348	0.3005	0.23826	0.34095	0.31723	0.0523	0.37975	0.43992		Mean98	15.2499	0.27497	0.00034038	1.30877e-05	15.3886	0.29714	0.24636	0.24894	0.00195	1.35843e-06			0.00201	0.00202	0	1647			Mean168	54.3381	0.79553	0.000418109	7.42055e-06	54.8727	0.8555	0.17434	0.17597
3280	0.98206	1.05255					54.6667	0.33128	0.36315	0.22873	0.20435	0.22284	0.35371	0.29849	0.22319	0.35193	0.31334	0.05726	0.35997	0.47082		Mean99	18.0063	0.39123	0.000429833	1.55019e-05	18.3233	0.41682	0.21292	0.21514	0.00197	1.36921e-06			0.00204	0.00205	1	1648			Mean169	33.3659	0.2246	0.000311704	5.31491e-06	35.6551	0.24334	0.54495	0.55006
3320	0.94854	1.06989					55.3333	0.335	0.33036	0.22502	0.17895	0.20022	0.35597	0.31269	0.22941	0.34095	0.30398	0.04812	0.33788	0.40792		Mean101	15.1371	0.38639	0.000423028	1.811e-05	15.6291	0.41245	0.21948	0.22178	0.00199	1.38181e-06			0.00206	0.00208	0	1648			Mean171	23.7296	0.21552	0.000261417	6.84632e-06	23.4454	0.23067	0.20272	0.20462
3360	0.95693	0.99053					56	0.30419	0.31397	0.22372	0.17411	0.19698	0.3348	0.26597	0.20813	0.30716	0.32347	0.04479	0.32194	0.40466		Mean104	14.4037	0.3846	0.000420514	1.89053e-05	14.8212	0.41084	0.18928	0.19126	0.00201	1.39496e-06			0.00209	0.0021	0	1648			Mean178	119.845	1.80144	0.000191993	5.54259e-06	114.484	2.43376	0.29419	0.29695
3400	0.98419	1.03521					56.6667	0.31527	0.28754	0.19877	0.1753	0.19591	0.3326	0.28429	0.22232	0.30806	0.31488	0.06223	0.34247	0.42008		Mean106	40.3278	1.81275	0.000417422	1.57413e-05	40.65	1.8823	0.34699	0.35062	0.00202	1.4059e-06			0.00211	0.00213	0	1648			Mean179	43.2487	0.485	0.000217854	6.61195e-06	42.6213	0.6874	0.14904	0.15044
3440	1.04179	1.02773					57.3333	0.30176	0.29128	0.20747	0.17895	0.2056	0.3315	0.24976	0.21348	0.29432	0.29696	0.05645	0.31584	0.40024		Mean108	41.6584	2.13549	0.00050866	1.95125e-05	42.2594	2.18569	0.20064	0.20274	0.00204	1.41947e-06			0.00214	0.00215	0	1648			Mean181	37.5963	4.08603	0.000204728	2.95614e-05	35.9989	4.91049	0.03797	0.03832
3480	0.98206	0.97197					58	0.30176	0.27869	0.21371	0.16927	0.20666	0.34816	0.25583	0.19574	0.29432	0.30633	0.05394	0.35162	0.3925		Mean110	9.69129	1.25034	0.000603202	7.12038e-05	10.2991	1.28178	0.02474	0.025	0.00211	1.46899e-06			0.00216	0.00218	0	1648			Mean182	62.0243	0.59931	0.000240848	5.01369e-06	61.1081	0.78228	0.32114	0.32415
3520	0.98102	0.98312					58.6667	0.31156	0.30138	0.18622	0.15235	0.20022	0.32925	0.28835	0.21435	0.28886	0.28918	0.03901	0.31125	0.37375		Mean111	19.6078	0.41606	0.000699996	2.29516e-05	22.0044	0.42591	0.18998	0.19197	0.00214	1.48495e-06			0.00219	0.0022	0	1648			Mean183	8.29001	0.40875	0.00114	8.8723e-05	9.9056	0.41301	0.03217	0.03247
3560	0.97999	1.07608					59.3333	0.30176	0.28754	0.19123	0.156	0.19804	0.29367	0.28835	0.20196	0.27331	0.29696	0.04397	0.33409	0.39032		Mean112	18.4576	0.30835	0.000418807	1.31078e-05	18.8961	0.3257	0.31298	0.31625	0.00215	1.49406e-06			0.00221	0.00223	0	1648			Mean184	21.7445	0.22162	0.000299401	7.97052e-06	21.3933	0.24025	0.28889	0.29159
3600	0.95481	0.94715					60	0.33007	0.32407	0.20624	0.12814	0.23252	0.32034	0.24876	0.18335	0.287	0.29773	0.04315	0.3082	0.41125		Mean113	23.7867	0.30176	0.000303578	8.41267e-06	28.2297	0.33988	0.27003	0.27285	0.00216	1.49991e-06			0.00224	0.00225	0	1648			Mean186	9.42791	0.30835	0.000624292	3.56129e-05	11.0009	0.31698	0.04074	0.04112
3640	0.9674	1.0042					60.6667	0.28325	0.2762	0.16874	0.15116	0.19379	0.35707	0.23957	0.20813	0.29432	0.29384	0.04065	0.31659	0.44215		Mean115	27.9976	0.46961	0.000851748	2.11043e-05	30.0932	0.47803	0.17156	0.17335	0.00218	1.51459e-06			0.00226	0.00228	0	1648			Mean190	18.7837	0.25648	0.000423945	1.18855e-05	18.6485	0.27104	0.18307	0.18479
3680	1.00304	1.16537					61.3333	0.26353	0.26105	0.195	0.14028	0.17548	0.32479	0.2467	0.20726	0.26875	0.2985	0.03651	0.33183	0.38918		Mean116	44.1022	2.15034	0.000488094	1.79038e-05	44.7437	2.20462	0.2327	0.23514	0.0022	1.52704e-06			0.00229	0.0023	0	1648			Mean192	5.6462	0.29082	0.000552087	5.16339e-05	6.27634	0.30102	0.04441	0.04483
3720	1.00511	1.15299					62	0.26846	0.2598	0.20377	0.1294	0.18298	0.32369	0.22843	0.19399	0.28244	0.2767	0.04233	0.31509	0.36383		Mean117	6.09217	0.32476	0.000336173	3.57201e-05	8.1935	0.35888	0.07168	0.07243	0.00223	1.55188e-06			0.00231	0.00233	0	1648			Mean198	-7.92268e-07	?	1.59371e-13	?	19.4659	0.17595	131.05	132.278
3760	0.98838	0.98434					62.6667	0.29805	0.2459	0.18499	0.11727	0.17979	0.29257	0.22843	0.1869	0.25411	0.28136	0.0274	0.2953	0.36051		Mean120	28.2217	0.61029	0.000357057	1.10608e-05	28.4819	0.66784	0.37876	0.38272	0.00224	1.55957e-06			0.00234	0.00235	0	1648			Mean201	10.9329	0.39062	0.00103	5.87743e-05	12.4918	0.39534	0.03589	0.03622
3800	1.04392	0.93477					63.3333	0.27832	0.26734	0.18999	0.13179	0.18729	0.2714	0.22236	0.17981	0.26324	0.2463	0.03901	0.27247	0.35833		Mean122	6.68338	0.35932	0.000546889	4.8946e-05	8.2921	0.37194	0.07425	0.07503	0.00229	1.59361e-06			0.00236	0.00237	0	1648			Mean202	40.1384	0.2219	0.000300616	4.32758e-06	38.7857	0.24055	0.68235	0.68875
3840	0.98838	1.01909					64	0.25616	0.23331	0.18752	0.10884	0.15824	0.28257	0.21318	0.16295	0.2669	0.24318	0.03401	0.29985	0.33626		Mean123	14.8398	0.36542	0.000393524	1.70755e-05	15.5576	0.39378	0.20687	0.20903	0.00231	1.60548e-06			0.00239	0.0024	0	1648			Mean206	151.613	14.2385	0.000423712	1.84663e-05	152.028	14.4224	0.05399	0.05449
3880	1.0177	1.01413					64.6667	0.27461	0.26105	0.18752	0.10035	0.15069	0.28141	0.23556	0.20104	0.25135	0.24083	0.03319	0.26333	0.344		Mean124	8.20895	0.35377	0.000532464	3.85747e-05	10.4743	0.36677	0.13512	0.13654	0.00235	1.63231e-06			0.00241	0.00243	0	1648			Mean209	101.968	27.903	0.00102	9.14221e-05	102.429	27.936	0.01529	0.01544
3920	1.00092	0.71906					65.3333	0.26974	0.2358	0.13877	0.10519	0.16686	0.28586	0.21017	0.17447	0.26599	0.22369	0.03819	0.27931	0.344		Mean125	20.0109	0.34595	0.000512307	1.5111e-05	20.4783	0.35954	0.13006	0.13142	0.00236	1.64282e-06			0.00244	0.00245	0	1648			Mean212	18.3203	0.32228	0.000415913	1.36442e-05	19.1884	0.34989	0.09433	0.09522
3960	1.00511	1.07241					66	0.28204	0.2661	0.17251	0.1306	0.1658	0.25474	0.21017	0.17359	0.25777	0.24083	0.03237	0.27777	0.39032		Mean126	25.2208	0.52916	0.00103	3.06623e-05	26.4451	0.53662	0.08332	0.08419	0.00239	1.66414e-06			0.00246	0.00248	0	1648			Mean213	-527.864	537.126	-4.96597e-06	4.87341e-06	31.591	0.32537	6.99773	7.06333
4000	0.99672	1.18393					66.6667	0.28204	0.22197	0.17374	0.12456	0.14318	0.28702	0.21423	0.18156	0.27056	0.23617	0.03401	0.28387	0.29767		Mean127	42.7014	0.68002	0.000467476	9.26587e-06	44.0502	0.7159	0.21394	0.21618	0.0024	1.67058e-06			0.00249	0.0025	0	1648			Mean215	-969.343	1381.89	-2.91082e-06	4.06528e-06	31.4408	0.26554	13.1428	13.266
4040	0.95901	1.08723					67.3333	0.22786	0.24466	0.16003	0.08709	0.16037	0.28366	0.22437	0.18598	0.26965	0.25019	0.03569	0.26562	0.32083		Mean129	41.4917	2.73536	0.000485305	2.20397e-05	41.9982	2.79457	0.18867	0.19065	0.00242	1.68591e-06			0.00251	0.00253	0	1648			Mean217	55.289	0.74327	0.000304493	6.26578e-06	55.2545	0.86069	0.1384	0.1397
4080	1.04288	0.84548					68	0.2463	0.24466	0.15749	0.11004	0.1733	0.26475	0.17358	0.16387	0.24408	0.21667	0.03819	0.24049	0.32857		Mean132	20.2697	0.46426	0.000405296	1.44189e-05	20.6427	0.49969	0.35167	0.35534	0.00244	1.69594e-06			0.00254	0.00255	0	1648			Mean218	11.6593	0.257	0.00042578	1.92228e-05	12.0669	0.27148	0.04523	0.04565
4120	0.93595	1.15421					68.6667	0.25738	0.2358	0.15372	0.11242	0.15069	0.2581	0.17564	0.17801	0.23586	0.22446	0.03155	0.24583	0.32634		Mean134	17.939	0.3987	0.000440311	1.59977e-05	18.3607	0.4236	0.2629	0.26565	0.00245	1.70706e-06			0.00256	0.00258	0	1648			Mean224	8.09721	0.2728	0.000482821	3.12244e-05	8.3497	0.28506	0.02545	0.02568
4160	0.91709	0.98067					69.3333	0.26724	0.23961	0.16497	0.11123	0.17867	0.2703	0.18784	0.19662	0.23767	0.20966	0.0274	0.24504	0.32525		Mean135	17.583	0.33872	0.000355879	1.30361e-05	17.7591	0.37066	0.37362	0.37752	0.00247	1.71613e-06			0.00259	0.0026	0	1648			Mean225	7.02303	0.33014	0.000721116	5.7008e-05	8.98568	0.33729	0.12846	0.12966
4200	0.92445	1.02154					70	0.25373	0.22066	0.15125	0.104	0.15069	0.26695	0.18171	0.18156	0.24499	0.21043	0.02322	0.242	0.30432		Mean136	16.6072	0.33451	0.000349942	1.35869e-05	16.8375	0.36709	0.41113	0.41542	0.00248	1.72558e-06			0.00261	0.00263	0	1648			Mean235	21.1957	2.41506	0.000852671	6.63728e-05	22.1159	2.44199	0.05968	0.06024
4240	0.93911	0.84052					70.6667	0.25245	0.232	0.12376	0.11607	0.16149	0.25584	0.17258	0.18248	0.22578	0.22292	0.02904	0.24963	0.31424		Mean137	15.0951	0.29931	0.000397175	1.51989e-05	15.3212	0.31783	0.30219	0.30535	0.0025	1.73615e-06			0.00264	0.00265	0	1648			Mean242	16.881	0.49761	0.000721621	2.92045e-05	17.9959	0.51319	0.03992	0.0403
4280	0.91497	0.86534					71.3333	0.25373	0.20682	0.15372	0.1028	0.18086	0.27921	0.18277	0.17981	0.22669	0.21667	0.04151	0.22526	0.31751		Mean138	42.7172	1.52562	0.000404047	1.31147e-05	42.8729	1.5953	0.44977	0.45447	0.00251	1.74527e-06			0.00266	0.00268	0	1648			Mean245	9.83909	0.35142	0.000823674	4.82295e-05	10.6442	0.35751	0.02983	0.03011
4320	0.88984	0.90376					72	0.23894	0.21311	0.14501	0.11004	0.16362	0.27811	0.16445	0.16562	0.22578	0.21278	0.02322	0.242	0.28558		Mean139	27.5837	1.65006	0.000525691	2.59227e-05	28.2327	1.69358	0.11701	0.11823	0.00254	1.76329e-06			0.00269	0.0027	0	1648			Mean246	9.72099	0.25804	0.000429452	2.32361e-05	10.4172	0.27236	0.07801	0.07874
4360	0.86679	0.95334					72.6667	0.24387	0.20931	0.14248	0.08947	0.14425	0.22692	0.16851	0.15853	0.23857	0.20889	0.03237	0.22526	0.29767		Mean140	50.4454	0.36549	0.000290306	4.34488e-06	51.7751	0.42341	0.45065	0.45536	0.00254	1.76631e-06			0.00271	0.00273	0	1648			Mean248	27.8598	0.32262	0.000416519	8.98509e-06	28.0985	0.35019	0.28596	0.28864
4400	0.85524	1.07363					73.3333	0.25495	0.19043	0.15002	0.09193	0.14318	0.22472	0.16345	0.14347	0.22488	0.20419	0.03155	0.23365	0.29549		Mean141	19.2301	0.59889	0.000522013	2.11388e-05	20.202	0.62571	0.13207	0.13345	0.00256	1.78101e-06			0.00274	0.00275	0	1648			Mean249	10.0983	0.29173	0.000555701	2.90801e-05	11.4889	0.30184	0.06232	0.0629
4440	0.79234	1.07859					74	0.2586	0.21187	0.13747	0.09193	0.14531	0.22357	0.15532	0.17184	0.22488	0.20342	0.03073	0.2283	0.31092		Mean142	23.1364	0.37369	0.000405173	1.12983e-05	23.6133	0.4011	0.47083	0.47576	0.00257	1.78887e-06			0.00276	0.00278	0	1648			Mean250	15.3371	0.30147	0.000595336	2.07069e-05	15.907	0.31066	0.03603	0.03637
4480	0.784	0.9955					74.6667	0.23644	0.21816	0.14625	0.1028	0.16793	0.1969	0.14925	0.16917	0.2322	0.20111	0.0249	0.223	0.29882		Mean143	12.1927	0.4357	0.000754967	4.09256e-05	13.6821	0.44493	0.07622	0.07701	0.00261	1.81733e-06			0.00279	0.0028	0	1648			Mean251	78.9059	1.31976	0.000228593	6.31798e-06	76.9581	1.6474	0.315	0.31796
4520	0.79027	1.00298					75.3333	0.25245	0.22066	0.13747	0.08947	0.141	0.24803	0.16445	0.17539	0.20934	0.20111	0.02822	0.20017	0.28558		Mean144	14.7985	0.39899	0.000652971	2.77121e-05	17.2671	0.4095	0.15988	0.16155	0.00264	1.8366e-06			0.00281	0.00283	0	1648			Mean252	7.47202e-08	1776620000000000	-5.19477e-13	12351600000	31.9417	0.14689	252.08	254.443
4560	0.75779	0.87772					76	0.2463	0.21692	0.13377	0.06772	0.15393	0.1958	0.15637	0.17272	0.1956	0.17614	0.03237	0.20927	0.26683		Mean145	11.5961	0.47565	0.000869178	5.24452e-05	13.909	0.48395	0.163	0.1647	0.00269	1.87307e-06			0.00284	0.00285	0	1648			Mean257	15.5987	0.24914	0.000398421	1.35594e-05	16.9186	0.26483	0.13808	0.13938
4600	0.75463	0.89383					76.6667	0.24508	0.18538	0.12122	0.08947	0.12919	0.23357	0.15025	0.16562	0.2139	0.18863	0.03401	0.21691	0.29882		Mean146	20.2526	0.44812	0.000390503	1.38294e-05	20.5715	0.48517	0.33133	0.3348	0.00271	1.88269e-06			0.00286	0.00288	0	1648			Mean260	8.80538	0.3891	0.00103	7.21469e-05	9.21036	0.39387	0.0175	0.01766
4640	0.76198	0.94218					77.3333	0.23029	0.19672	0.13123	0.08463	0.14638	0.21801	0.15431	0.17626	0.20568	0.17148	0.0274	0.20547	0.26901		Mean148	12.0474	0.54696	0.00064102	3.91617e-05	12.8126	0.56423	0.06588	0.06657	0.00275	1.90992e-06			0.00289	0.0029	0	1648			Mean261	17.2031	0.32382	0.00069219	2.21169e-05	18.0767	0.33135	0.04295	0.04335
4680	0.6865	0.97442					78	0.23401	0.22446	0.11498	0.09432	0.141	0.19464	0.14418	0.15678	0.20292	0.18551	0.03155	0.19937	0.25467		Mean149	11.3735	0.34308	0.000504965	2.61387e-05	11.968	0.3569	0.12597	0.12728	0.00277	1.9281e-06			0.00291	0.00293	0	1648			Mean264	18.7689	0.25429	0.000416299	1.17036e-05	19.9623	0.26918	0.07913	0.07987
4720	0.69593	0.92858					78.6667	0.23401	0.17279	0.13247	0.08224	0.14207	0.18244	0.15838	0.15678	0.20658	0.16135	0.02572	0.19102	0.29882		Mean151	24.0817	0.39507	0.000642265	1.66628e-05	26.7474	0.40574	0.22187	0.22419	0.00279	1.93969e-06			0.00294	0.00295	0	1648			Mean265	24.8823	0.32938	0.000191424	9.57919e-06	23.9438	0.50074	0.10484	0.10583
4760	0.70748	0.91124					79.3333	0.22536	0.21311	0.13247	0.08463	0.13994	0.198	0.15738	0.17272	0.20021	0.17537	0.03155	0.19712	0.26901		Mean152	24.2891	0.3389	0.000494344	1.19402e-05	26.1035	0.35307	0.11058	0.11174	0.0028	1.94799e-06			0.00296	0.00298	0	1648			Mean267	8.92673	0.37038	0.000921992	6.16649e-05	9.32366	0.37573	0.02279	0.023
4800	0.71588	1.01535					80	0.23029	0.17403	0.12376	0.09193	0.11951	0.20135	0.13504	0.16475	0.17915	0.159	0.02322	0.18188	0.24475		Mean155	16.5967	0.51471	0.0004505	2.00467e-05	17.271	0.54605	0.17657	0.17842	0.00282	1.96193e-06			0.00299	0.003	0	1648			Mean271	18.3877	0.2731	0.000483926	1.37819e-05	18.4114	0.28532	0.12723	0.12842
4840	0.64878	0.95334					80.6667	0.23894	0.19797	0.13747	0.07495	0.13132	0.18799	0.13705	0.18865	0.19745	0.18474	0.02408	0.16744	0.26683		Mean156	19.3283	0.28511	0.000363839	1.09354e-05	19.9082	0.30569	0.52544	0.53094	0.00283	1.96954e-06			0.00301	0.00303	0	1648			Mean276	82.7136	0.60451	0.000250549	3.74633e-06	80.6832	0.77115	0.32309	0.32611
4880	0.67184	1.0178					81.3333	0.2463	0.19043	0.12623	0.10035	0.11839	0.20135	0.13298	0.17893	0.19194	0.16601	0.02654	0.18343	0.2635		Mean157	12.2178	0.48978	0.00056557	3.2318e-05	13.0664	0.509	0.06069	0.06132	0.00286	1.99201e-06			0.00304	0.00305	0	1648			Mean278	21.5614	0.43554	0.000615832	1.83337e-05	22.0163	0.45345	0.04567	0.0461
4920	0.62469	1.08478					82	0.23401	0.18282	0.12252	0.08463	0.14856	0.18018	0.13504	0.1559	0.19745	0.15823	0.0224	0.17808	0.22715		Mean159	19.3791	0.3536	0.000532026	1.63239e-05	19.923	0.36662	0.14029	0.14176	0.00288	2.00336e-06			0.00306	0.00308	0	1648			Mean283	16.1392	0.51085	0.00122	5.4712e-05	17.1708	0.5175	0.03829	0.03865
4960	0.66028	0.94844					82.6667	0.21185	0.18282	0.12499	0.06049	0.13025	0.20355	0.13911	0.18248	0.17003	0.16836	0.02822	0.18343	0.26132		Mean160	21.1374	0.5024	0.000947081	3.2554e-05	22.9045	0.51023	0.09436	0.09534	0.00291	2.026e-06			0.00309	0.0031	0	1648			Mean286	21.6395	0.35258	0.00046976	1.31115e-05	21.7174	0.37652	0.06882	0.06946
5000	0.64562	1.02528					83.3333	0.21057	0.18538	0.10751	0.07376	0.13887	0.18689	0.13705	0.16562	0.20382	0.15588	0.01825	0.16744	0.23925		Mean161	41.8951	1.42446	0.00052427	1.56206e-05	42.5861	1.46596	0.35267	0.35636	0.00293	2.03686e-06			0.00311	0.00313	0	1648			Mean291	17.794	0.24313	0.000377721	1.13807e-05	19.6947	0.25976	0.13251	0.13375
5040	0.57226	1.01039					84	0.23279	0.19921	0.11128	0.08947	0.12701	0.19354	0.13399	0.16033	0.18101	0.16366	0.02076	0.17049	0.2635		Mean163	19.5219	0.32483	0.000336272	1.115e-05	19.4664	0.35893	0.42394	0.42837	0.00294	2.04462e-06			0.00314	0.00315	0	1648			Mean292	11.6524	0.22411	0.000309752	1.51628e-05	12.0631	0.24285	0.09035	0.0912
5080	0.63516	0.98931					84.6667	0.22293	0.18413	0.10874	0.08828	0.13025	0.19464	0.13198	0.14969	0.17549	0.14964	0.01575	0.16969	0.22274		Mean164	15.8457	0.36998	0.000399949	1.62683e-05	16.2331	0.39781	0.16871	0.17048	0.00296	2.05593e-06			0.00316	0.00318	0	1648			Mean295	121.044	11.8049	0.0026	0.000113186	121.422	11.8172	0.05271	0.0532
5120	0.59744	0.78353					85.3333	0.2057	0.15003	0.11375	0.06891	0.12057	0.17133	0.10865	0.15853	0.18101	0.14733	0.0224	0.15525	0.22159		Mean165	13.1593	0.47223	0.000541872	2.8308e-05	13.6366	0.49224	0.08239	0.08326	0.00298	2.07562e-06			0.00319	0.0032	0	1648			Mean299	7.59634	0.29011	0.000549236	3.81587e-05	8.81254	0.30038	0.03599	0.03632
5160	0.58693	1.19509					86	0.21057	0.16898	0.13877	0.07495	0.12488	0.19019	0.12385	0.16295	0.17735	0.15045	0.01743	0.16819	0.24475		Mean166	18.3255	0.55024	0.000481292	1.98089e-05	19.107	0.5794	0.22382	0.22616	0.003	2.08939e-06			0.00321	0.00323	0	1648			Mean300	9.67542	0.26754	0.000463493	2.50904e-05	9.96988	0.2805	0.04024	0.04062
5200	0.5733	1.03766					86.6667	0.20077	0.17528	0.13	0.06527	0.11951	0.16908	0.10759	0.15945	0.19194	0.12937	0.02654	0.1522	0.24258		Mean167	12.835	0.34492	0.000509686	2.3417e-05	13.4658	0.3586	0.11589	0.1171	0.00303	2.10568e-06			0.00324	0.00325	0	1648			Mean304	8.71641	0.2747	0.000489919	2.94402e-05	9.13522	0.28673	0.05505	0.05557
5240	0.59216	1.04636					87.3333	0.20442	0.15384	0.08001	0.09067	0.12163	0.15797	0.11166	0.16742	0.17183	0.12706	0.02322	0.14385	0.23042		Mean169	38.7846	1.64633	0.000403992	1.51191e-05	39.1954	1.7181	0.31705	0.32036	0.00304	2.11619e-06			0.00326	0.00328	0	1648			Mean309	10.5913	0.26598	0.000457818	2.26477e-05	10.6403	0.27915	0.08466	0.08546
5280	0.5618	0.98557					88	0.21306	0.15003	0.10627	0.06168	0.13132	0.16462	0.11372	0.17272	0.16817	0.1395	0.02076	0.1545	0.24584		Mean170	14.7225	0.43978	0.000497462	2.26216e-05	15.2954	0.46158	0.18025	0.18214	0.00307	2.13192e-06			0.00329	0.0033	0	1648			Mean315	28.0527	0.38439	0.000239712	8.67583e-06	29.3478	0.51303	0.11655	0.11764
5320	0.52823	1.10335					88.6667	0.23029	0.15259	0.10627	0.07011	0.13238	0.16462	0.13399	0.15945	0.17825	0.12548	0.02572	0.1446	0.24366		Mean172	14.1361	0.76432	0.00051426	3.22347e-05	14.7479	0.7967	0.06808	0.06879	0.0031	2.15434e-06			0.00331	0.00333	0	1648			Mean319	5.59722	0.35767	0.000855348	8.90632e-05	5.88507	0.3635	0.01327	0.0134
5360	0.54708	1.14803					89.3333	0.22414	0.16144	0.09249	0.07256	0.11732	0.16908	0.12079	0.15945	0.17735	0.1286	0.02322	0.14231	0.23592		Mean173	16.6884	0.49804	0.00043575	1.91141e-05	17.4047	0.53059	0.19167	0.19367	0.00312	2.16763e-06			0.00334	0.00335	0	1648			Mean320	16.8457	0.42594	0.000599151	2.26264e-05	17.2982	0.44433	0.03114	0.03143
5400	0.55548	0.8616					90	0.18598	0.17023	0.10627	0.07495	0.10551	0.14796	0.10358	0.14527	0.16271	0.1177	0.01825	0.14385	0.21941		Mean174	18.6073	0.44991	0.000795261	2.88265e-05	21.1508	0.45877	0.1585	0.16016	0.00315	2.18768e-06			0.00336	0.00338	0	1648			Mean322	23.2074	0.30901	0.000627071	1.4544e-05	24.282	0.31758	0.21823	0.22028
5440	0.51673	1.04514					90.6667	0.22658	0.14374	0.10751	0.05565	0.11195	0.15352	0.12591	0.16208	0.16361	0.14032	0.02408	0.12786	0.20175		Mean175	23.0799	0.43264	0.000487591	1.40688e-05	23.7161	0.4549	0.36	0.36376	0.00316	2.19746e-06			0.00339	0.0034	0	1648			Mean324	8.46404	0.219	0.000287044	2.00276e-05	8.94133	0.23714	0.04378	0.04419
5480	0.5188	1.1517					91.3333	0.20935	0.15889	0.09249	0.06652	0.10551	0.15571	0.09746	0.14527	0.1618	0.11381	0.02322	0.13242	0.23042		Mean176	15.6308	0.57124	0.000499072	2.4408e-05	16.062	0.5993	0.10789	0.10902	0.00318	2.21443e-06			0.00341	0.00343	0	1648			Mean325	20533.6	5301.38	0.00083383	3.14862e-05	20532.6	5301.56	0.48869	0.49327
5520	0.51983	1.00794					92	0.19584	0.14249	0.10374	0.06407	0.10982	0.12905	0.10559	0.16475	0.18101	0.13484	0.01411	0.13091	0.23707		Mean177	177.932	14.0402	0.000511573	1.6727e-05	178.268	14.1258	0.28111	0.28405	0.0032	2.22607e-06			0.00344	0.00345	0	1648			Mean326	12.9921	0.34767	0.000152619	1.15885e-05	12.1471	0.20318	0.12532	0.1265
5560	0.49787	0.90995					92.6667	0.2057	0.14505	0.09373	0.05684	0.12488	0.14016	0.10865	0.15765	0.14992	0.113	0.02408	0.11188	0.19407		Mean179	12.2088	0.42702	0.000730571	3.90675e-05	13.0926	0.43651	0.0798	0.08064	0.00324	2.25323e-06			0.00346	0.00348	0	1648			Mean328	14.5984	0.27259	0.000482032	1.72905e-05	15.6029	0.28488	0.08377	0.08455
5600	0.5188	1.00169					93.3333	0.23644	0.15259	0.08502	0.08099	0.12057	0.14906	0.09138	0.14259	0.1618	0.1068	0.01907	0.13546	0.19625		Mean180	29.6392	1.50955	0.000451399	2.02599e-05	30.1626	1.56521	0.23448	0.23693	0.00326	2.26732e-06			0.00349	0.0035	0	1648			Mean329	64.6277	1.17328	0.000543579	9.29749e-06	64.9639	1.21612	0.10732	0.10832
5640	0.48844	1.09968					94	0.218	0.1299	0.10874	0.04835	0.1087	0.13796	0.09846	0.13905	0.14807	0.113	0.01994	0.12407	0.18415		Mean182	25.6275	0.86478	0.00123	4.79224e-05	27.3101	0.87508	0.13902	0.14048	0.00331	2.30065e-06			0.00351	0.00353	0	1648			Mean331	18.005	0.24676	0.000390188	1.15451e-05	19.8677	0.26282	0.14474	0.1461
5680	0.44964	1.12572					94.6667	0.20935	0.14754	0.1025	0.06652	0.11839	0.14351	0.10358	0.15498	0.13894	0.11381	0.01994	0.11722	0.19958		Mean183	16.8368	0.36642	0.000394927	1.51067e-05	17.3321	0.39466	0.20819	0.21036	0.00332	2.31115e-06			0.00354	0.00355	0	1648			Mean333	41.8249	0.43023	0.000285456	6.1171e-06	40.757	0.52438	0.31212	0.31504
5720	0.46119	0.74756					95.3333	0.19949	0.15764	0.10751	0.06288	0.1087	0.12795	0.08526	0.14702	0.16727	0.12159	0.01411	0.12407	0.17091		Mean184	14.2183	0.31815	0.000442627	1.8032e-05	14.6519	0.33436	0.1732	0.17501	0.00334	2.32369e-06			0.00356	0.00358	0	1648			Mean334	57.1309	0.9214	0.000331875	6.96163e-06	56.6116	1.02886	0.17899	0.18066
5760	0.46326	0.91988					96	0.18476	0.14249	0.08749	0.06652	0.11408	0.14571	0.07919	0.16387	0.14992	0.11847	0.02322	0.11338	0.17309		Mean185	13.9164	0.31215	0.00042799	1.77794e-05	14.27	0.32904	0.15958	0.16125	0.00336	2.33606e-06			0.00359	0.0036	0	1648			Mean335	22.381	0.22108	0.000296999	7.70995e-06	24.6779	0.23964	0.25142	0.25377
5800	0.47062	1.0042					96.6667	0.20692	0.13364	0.09126	0.05804	0.10982	0.12679	0.08426	0.15498	0.15173	0.10368	0.02076	0.11947	0.19516		Mean186	19.1258	0.34729	0.000367968	1.23757e-05	19.296	0.378	0.33512	0.33862	0.00337	2.34466e-06			0.00361	0.00363	0	1648			Mean336	8.2294	0.42093	0.00122	9.76891e-05	9.94544	0.42493	0.04142	0.04181
5840	0.43601	0.91369					97.3333	0.21057	0.1261	0.0975	0.05684	0.12807	0.1246	0.08732	0.13817	0.14992	0.11381	0.01411	0.12482	0.17974		Mean187	14.8141	0.40541	0.000449703	1.98581e-05	15.3522	0.42973	0.14582	0.14734	0.00339	2.35847e-06			0.00364	0.00365	0	1648			Mean337	23.1109	0.35819	0.000479717	1.25665e-05	23.7916	0.38155	0.14921	0.15061
5880	0.43285	0.93973					98	0.19334	0.12866	0.09626	0.06527	0.12382	0.11904	0.08225	0.14881	0.14807	0.09042	0.0224	0.11338	0.18083		Mean188	12.9759	0.44748	0.000508069	2.63709e-05	13.5503	0.46881	0.11357	0.11475	0.00342	2.37681e-06			0.00366	0.00368	0	1648			Mean339	7.80212	0.39605	0.00107	8.57928e-05	8.59512	0.40063	0.02298	0.02319
5920	0.44544	0.93973					98.6667	0.19584	0.13239	0.09002	0.04477	0.11089	0.11904	0.07512	0.14439	0.1435	0.11223	0.02322	0.11033	0.16317		Mean189	16.9154	0.39001	0.000428115	1.64266e-05	17.4394	0.41572	0.22062	0.22293	0.00343	2.38824e-06			0.00369	0.0037	0	1648			Mean340	19.6046	1.44159	0.00444	0.000361602	20.4986	1.44611	0.03016	0.03044
5960	0.42762	1.03147					99.3333	0.21678	0.11475	0.09503	0.05439	0.11089	0.11569	0.0812	0.14347	0.1435	0.09979	0.01575	0.11188	0.18742		Mean190	14.2035	0.31732	0.000440587	1.79617e-05	14.6343	0.33362	0.16639	0.16813	0.00345	2.40073e-06			0.00371	0.00373	0	1648			Mean344	83.0347	9.39664	0.00143	7.25262e-05	84.1438	9.41618	0.07133	0.072
6000	0.45171	0.9211					100	0.23279	0.12105	0.09002	0.06049	0.11195	0.12234	0.07919	0.13817	0.15358	0.10445	0.01907	0.11263	0.17091		Mean192	20.1058	0.32709	0.000339463	1.09171e-05	20.8313	0.36083	0.5205	0.52594	0.00346	2.40832e-06			0.00374	0.00375	0	1648			Mean348	9.05677	0.28383	0.000524623	3.04437e-05	9.85429	0.29477	0.0449	0.04532
6040	0.37208	0.96945					100.667	0.20935	0.12866	0.09873	0.05565	0.10008	0.11459	0.08933	0.16033	0.15724	0.08807	0.01161	0.10653	0.17532		Mean193	13.5058	0.38398	0.000419648	2.01158e-05	14.4425	0.41029	0.17338	0.17519	0.00348	2.42231e-06			0.00376	0.00378	0	1648			Mean349	9.92441	0.31725	0.000662855	3.63556e-05	10.4	0.32522	0.07868	0.07942
6080	0.37944	0.99924					101.333	0.18969	0.14249	0.08502	0.06527	0.11732	0.11904	0.08732	0.15498	0.15995	0.09585	0.02408	0.11947	0.18851		Mean195	31.3091	0.53098	0.00103	2.48911e-05	33.7741	0.53842	0.41636	0.42072	0.00351	2.43962e-06			0.00379	0.0038	0	1648			Mean352	8.56844	0.34652	0.00079935	5.32716e-05	9.06823	0.35283	0.02362	0.02384
6120	0.38047	0.89757					102	0.21678	0.13239	0.09249	0.05684	0.11626	0.12124	0.07512	0.14347	0.15814	0.09666	0.02076	0.10273	0.16099		Mean197	24.8404	0.41893	0.00070798	1.83972e-05	27.2757	0.42869	0.22892	0.23132	0.00353	2.45241e-06			0.00381	0.00383	0	1648			Mean357	55.4389	0.53214	0.000266082	5.17594e-06	53.6485	0.66393	0.30228	0.30512
6160	0.38254	1.04636					102.667	0.21428	0.11475	0.07878	0.0508	0.10551	0.1357	0.07106	0.13463	0.13984	0.09196	0.01907	0.10808	0.17532		Mean198	36.5819	0.45874	0.000820502	1.53201e-05	39.6858	0.4674	0.51379	0.51916	0.00354	2.46306e-06			0.00384	0.00385	0	1648			Mean359	66.5586	16.2893	0.00231	0.000226142	67.7713	16.3032	0.03559	0.03592
6200	0.36369	0.82814					103.333	0.18598	0.14249	0.10127	0.05923	0.09902	0.09457	0.07106	0.14614	0.1234	0.09042	0.01907	0.10428	0.1775		Mean199	37.1329	2.57169	0.000500689	2.42701e-05	37.6569	2.62645	0.13992	0.14138	0.00357	2.47994e-06			0.00386	0.00388	0	1648			Mean360	99.839	23.1769	0.000706044	5.69573e-05	100.187	23.2365	0.01709	0.01725
6240	0.36685	1.04514					104	0.19212	0.12866	0.08502	0.06288	0.12807	0.09677	0.07819	0.14702	0.15268	0.08884	0.01411	0.11188	0.15325		Mean200	74.4161	5.14272	0.00034749	1.54302e-05	74.5219	5.29897	0.39588	0.40002	0.00358	2.49067e-06			0.00389	0.0039	0	1648			Mean362	6.25167	0.29819	0.000581842	4.94765e-05	6.59666	0.30768	0.02155	0.02175
6280	0.35529	1.05255					104.667	0.19212	0.1299	0.09373	0.04955	0.11408	0.10342	0.068	0.14794	0.15358	0.09431	0.01661	0.08829	0.1775		Mean201	15.0049	0.36035	0.00054957	2.19323e-05	15.6472	0.3729	0.09669	0.0977	0.0036	2.50592e-06			0.00391	0.00393	0	1648			Mean363	11.1821	0.34746	0.000804007	4.11276e-05	11.4807	0.35373	0.02807	0.02833
6320	0.37105	0.92607					105.333	0.20813	0.1463	0.07501	0.06407	0.10658	0.11123	0.07206	0.14084	0.13894	0.0873	0.02408	0.09438	0.16426		Mean207	6.04804	0.78863	0.0018	0.000302923	7.57077	0.79449	0.09535	0.09634	0.00391	2.71658e-06			0.00394	0.00395	0	1648			Mean368	211.72	9.87869	0.000338615	9.36132e-06	209.584	10.1779	0.15527	0.15673
6360	0.31758	0.98931					106	0.19827	0.12105	0.08749	0.06168	0.11408	0.11789	0.068	0.14172	0.13618	0.08653	0.0224	0.10198	0.16758		Mean209	54.7213	2.99629	0.000443728	1.65967e-05	55.2354	3.06918	0.31831	0.32164	0.00392	2.72812e-06			0.00396	0.00398	1	1649			Mean371	197.368	15.489	0.000587104	1.82754e-05	198.232	15.5694	0.05369	0.05419
6400	0.32701	1.04017					106.667	0.20813	0.11725	0.08749	0.06891	0.10333	0.08567	0.06599	0.14702	0.13528	0.0873	0.01575	0.08979	0.15107		Mean210	15.5244	0.28355	0.000360222	1.34945e-05	15.7312	0.30437	0.35043	0.3541	0.00394	2.73751e-06			0.00399	0.004	0	1649			Mean372	8.86698	0.30878	0.000626108	3.79964e-05	10.1078	0.31737	0.04408	0.04449
6440	0.33224	1.14803					107.333	0.20077	0.13239	0.06747	0.0508	0.11626	0.10568	0.07819	0.15144	0.1426	0.09196	0.02322	0.09664	0.14442		Mean211	19.3198	0.27608	0.000342938	1.03951e-05	19.3591	0.29807	0.63039	0.63698	0.00395	2.74473e-06			0.00401	0.00402	0	1649			Mean373	8.23968	0.37779	0.00096228	7.07346e-05	8.54611	0.3829	0.01486	0.015
6480	0.33644	1.09716					108	0.19334	0.1299	0.07878	0.0508	0.11089	0.08786	0.07512	0.14347	0.12796	0.0826	0.02076	0.07381	0.15549		Mean212	14.463	0.45981	0.000524963	2.46916e-05	15.1913	0.48045	0.13403	0.13544	0.00397	2.7619e-06			0.00404	0.00405	0	1649			Mean375	23.9212	0.26095	0.000439771	9.65154e-06	23.8281	0.27485	0.4131	0.41697
6520	0.31022	1.27445					108.667	0.16875	0.11856	0.09126	0.05684	0.1012	0.09122	0.07206	0.13992	0.1243	0.08495	0.01743	0.0761	0.15875		Mean213	14.2401	0.29775	0.00039349	1.5966e-05	14.6112	0.31649	0.22314	0.22547	0.00399	2.77301e-06			0.00406	0.00408	0	1649			Mean376	7.68463	0.32717	0.000240741	2.8791e-05	7.90921	0.43117	0.02729	0.02755
6560	0.31235	0.89138					109.333	0.15639	0.11856	0.07247	0.06049	0.10551	0.09232	0.05686	0.1355	0.1435	0.09119	0.01825	0.07915	0.14442		Mean214	18.7562	0.26154	0.000309362	9.88e-06	18.7999	0.28587	0.48619	0.49127	0.004	2.77988e-06			0.00409	0.0041	0	1649			Mean377	7.20699	0.32925	0.000717018	5.51579e-05	8.13646	0.33646	0.02726	0.02752
6600	0.31861	1.00794					110	0.18348	0.10466	0.08125	0.05804	0.10764	0.08011	0.068	0.15498	0.13438	0.08653	0.01994	0.08144	0.14775		Mean215	11.622	0.36779	0.000569106	2.95681e-05	12.3952	0.37986	0.05491	0.05548	0.00403	2.80044e-06			0.00411	0.00413	0	1649			Mean378	10.2507	0.33626	0.000749798	4.1027e-05	11.4412	0.34308	0.04495	0.04538
6640	0.29976	1.11702					110.667	0.17983	0.10341	0.08372	0.04716	0.12488	0.10123	0.068	0.15765	0.12891	0.07794	0.02322	0.07764	0.1775		Mean216	27.2438	2.62129	0.000563225	3.69908e-05	27.9211	2.66596	0.07724	0.07805	0.00406	2.82616e-06			0.00414	0.00415	0	1649			Mean381	14.5523	0.33226	0.00019332	1.64236e-05	15.2971	0.50365	0.08163	0.0824
6680	0.29976	1.2063					111.333	0.19091	0.1059	0.07748	0.0508	0.08503	0.09012	0.06699	0.15144	0.12064	0.0873	0.01161	0.08524	0.14115		Mean217	18.5476	0.49837	0.000436047	1.72127e-05	18.9569	0.5309	0.1669	0.16864	0.00408	2.83813e-06			0.00416	0.00417	0	1649			Mean382	53.1388	0.68314	0.000271535	6.18503e-06	53.7076	0.83051	0.21665	0.21868
6720	0.29349	1.13932					112	0.17368	0.11475	0.07377	0.05684	0.1012	0.09457	0.07006	0.15236	0.12615	0.07093	0.01243	0.08599	0.13674		Mean218	33.6405	2.33076	0.000430808	2.25247e-05	34.3938	2.402	0.12875	0.13009	0.0041	2.8538e-06			0.00419	0.0042	0	1649			Mean383	11.9717	0.27596	0.000494621	2.16463e-05	12.4588	0.28783	0.03774	0.0381
6760	0.29769	0.98434					112.667	0.1749	0.12485	0.06623	0.052	0.11732	0.11789	0.05279	0.15056	0.12249	0.07405	0.01994	0.0723	0.14224		Mean219	7.95085	1.62371	0.00397	0.000872001	8.89982	1.62871	0.06687	0.06757	0.00498	3.4602e-06			0.00421	0.00423	0	1649			Mean387	8.17599	0.29956	0.000587452	3.82503e-05	8.48142	0.30892	0.0234	0.02362
6800	0.28929	1.20501					113.333	0.16996	0.13115	0.08749	0.05319	0.1152	0.10568	0.0548	0.14259	0.12891	0.06939	0.01411	0.08829	0.14775		Mean220	26.1022	1.13125	0.000481564	2.04717e-05	26.656	1.17529	0.18802	0.18999	0.005	3.47443e-06			0.00424	0.00425	0	1649			Mean389	160.26	5.452	0.000458036	8.90291e-06	159.972	5.55557	0.34292	0.34613
6840	0.26831	1.16163					114	0.19827	0.1261	0.09126	0.06049	0.11408	0.07566	0.05786	0.15323	0.10785	0.06781	0.01161	0.07305	0.13559		Mean221	33.5285	2.47363	0.00050167	2.62695e-05	34.0881	2.52754	0.12743	0.12876	0.00502	3.4927e-06			0.00426	0.00428	0	1649			Mean392	10.6738	0.26521	0.000455025	2.23404e-05	11.0108	0.27849	0.04144	0.04182
6880	0.25888	0.93973					114.667	0.17611	0.1198	0.07124	0.052	0.09583	0.06785	0.05992	0.13817	0.11793	0.06157	0.01743	0.08675	0.12567		Mean222	15.0813	0.94788	0.000605729	3.94161e-05	15.8908	0.97556	0.06093	0.06157	0.00506	3.52011e-06			0.00429	0.0043	0	1649			Mean393	23.7169	0.21527	0.000254394	6.7774e-06	24.897	0.22889	0.13884	0.14014
6920	0.27354	1.02406					115.333	0.1724	0.09207	0.08625	0.04716	0.09796	0.06895	0.05079	0.13992	0.10876	0.07016	0.01743	0.06621	0.14224		Mean223	16.4994	0.3471	0.000367701	1.43355e-05	16.8871	0.37784	0.30712	0.31033	0.00508	3.53008e-06			0.00431	0.00432	0	1649			Mean395	21.6592	0.29234	0.000558126	1.36242e-05	21.9831	0.30238	0.05577	0.05629
6960	0.27354	0.83807					116	0.20199	0.09961	0.07624	0.0508	0.12382	0.08677	0.06499	0.14172	0.10971	0.07093	0.01994	0.07764	0.13232		Mean224	9.28746	0.35962	0.000547677	3.52843e-05	10.0099	0.37222	0.07243	0.07319	0.00511	3.55462e-06			0.00434	0.00435	0	1649			Mean398	12.3358	0.29886	0.000584593	2.52101e-05	13.3785	0.30829	0.04862	0.04907
7000	0.24526	1.08104					116.667	0.19584	0.11725	0.07	0.05565	0.10764	0.08121	0.04266	0.14439	0.12525	0.05926	0.01493	0.0799	0.12017		Mean225	8.04947	0.37689	0.000593263	4.49883e-05	8.80916	0.38845	0.05227	0.05282	0.00516	3.5859e-06			0.00436	0.00438	0	1649			Mean403	27.2884	0.35949	0.000482036	1.07006e-05	31.871	0.38272	0.2754	0.27798
7040	0.26204	1.05751					117.333	0.16996	0.09836	0.07878	0.05684	0.09902	0.0723	0.05786	0.12933	0.1234	0.07093	0.01825	0.09284	0.13674		Mean226	99.6116	13.6456	0.000584315	3.24881e-05	100.549	13.7093	0.10037	0.10141	0.00519	3.6085e-06			0.00439	0.0044	0	1649			Mean404	22.033	0.45969	0.000240153	1.22046e-05	22.6925	0.61127	0.09538	0.09627
7080	0.27251	0.9162					118	0.18104	0.10085	0.07124	0.04477	0.10439	0.07676	0.04567	0.1355	0.12981	0.07016	0.01825	0.07155	0.11908		Mean227	10.8768	0.50946	0.000591851	3.86747e-05	11.5748	0.52792	0.05702	0.05761	0.00523	3.63539e-06			0.00441	0.00443	0	1649			Mean408	58.7923	0.75812	0.000335338	6.07987e-06	58.0858	0.85295	0.2565	0.25891
7120	0.26095	1.16537					118.667	0.1749	0.10341	0.06376	0.05319	0.1012	0.07676	0.05686	0.14084	0.10148	0.06627	0.01825	0.0746	0.12791		Mean228	24.9921	0.30632	0.000413923	9.56547e-06	27.3025	0.32393	0.20145	0.20355	0.00524	3.64204e-06			0.00444	0.00445	0	1649			Mean410	30.6628	0.25264	0.000410524	7.0767e-06	30.3984	0.26778	0.58251	0.58798
7160	0.24002	1.21868					119.333	0.16996	0.11095	0.07748	0.0508	0.10227	0.06785	0.05179	0.14614	0.10605	0.06858	0.02408	0.06241	0.11576		Mean229	28.9257	0.44371	0.000777642	1.7973e-05	31.3818	0.45273	0.17354	0.17536	0.00526	3.65454e-06			0.00446	0.00447	0	1649			Mean411	19.0291	0.8598	0.00251	0.000142852	19.4528	0.86481	0.01649	0.01665
7200	0.24002	0.84181					120	0.16875	0.10466	0.06623	0.04716	0.10008	0.07011	0.04466	0.14347	0.1243	0.07016	0.02158	0.06696	0.11358		Mean230	12.2489	0.51259	0.000595996	3.46826e-05	12.9191	0.53093	0.03886	0.03927	0.00529	3.67866e-06			0.00449	0.0045	0	1649			Mean412	36.0585	0.22721	0.000321713	5.01339e-06	35.4598	0.24585	0.55683	0.56205
7240	0.24106	1.14925					120.667	0.16875	0.09711	0.07624	0.04351	0.11951	0.07566	0.04466	0.14347	0.11151	0.06003	0.01661	0.06621	0.12458		Mean231	68.8712	1.18816	0.000324327	6.27909e-06	70.1936	1.28915	0.54529	0.55099	0.0053	3.68303e-06			0.00451	0.00453	0	1649			Mean413	9.94582	0.31494	0.00065274	3.56074e-05	10.0747	0.32308	0.07899	0.07974
7280	0.24002	0.90131					121.333	0.18841	0.09331	0.07247	0.05439	0.09689	0.06004	0.03759	0.13817	0.11427	0.06003	0.02158	0.06546	0.12567		Mean232	27.3241	0.40354	0.000665424	1.53891e-05	29.4237	0.41386	0.17526	0.17709	0.00531	3.69373e-06			0.00454	0.00455	0	1649			Mean417	8.8959	0.3314	0.000726956	4.54639e-05	9.21587	0.33848	0.0151	0.01524
7320	0.24526	1.01161					122	0.17118	0.07692	0.06747	0.04835	0.09583	0.0723	0.03247	0.13195	0.10239	0.05767	0.01661	0.06316	0.13009		Mean234	18.0372	0.35448	0.000378099	1.34818e-05	18.4035	0.38421	0.36117	0.36495	0.00533	3.7031e-06			0.00456	0.00458	0	1649			Mean420	31.1468	0.22754	0.000322957	5.81802e-06	30.7111	0.24616	0.5662	0.57151
7360	0.20438	0.78727					122.667	0.16625	0.07062	0.06623	0.05439	0.09796	0.0612	0.03553	0.1355	0.11242	0.0608	0.01243	0.0647	0.11025		Mean235	10.5425	0.32394	0.000456886	2.517e-05	13.3772	0.33953	0.1864	0.18834	0.00535	3.72061e-06			0.00459	0.0046	0	1649			Mean421	12.1686	0.24372	0.000379738	1.67121e-05	13.1005	0.26026	0.07725	0.07797
7400	0.2264	1.04262					123.333	0.18841	0.08321	0.05752	0.05319	0.10658	0.06895	0.03653	0.13463	0.11517	0.07559	0.01493	0.05707	0.10807		Mean239	20.7795	0.33053	0.000344324	1.0699e-05	20.8345	0.36372	0.53275	0.53832	0.00536	3.72805e-06			0.00461	0.00463	0	1649			Mean427	12.001	0.25004	0.000401516	1.77397e-05	12.7951	0.26559	0.11928	0.1204
7440	0.20754	1.12321					124	0.15767	0.08826	0.06877	0.05565	0.1012	0.07011	0.02946	0.13463	0.0896	0.0608	0.01661	0.05097	0.10916		Mean240	7.02951	0.35333	0.000531325	4.49306e-05	7.64214	0.36637	0.03445	0.03481	0.00541	3.75929e-06			0.00464	0.00465	0	1649			Mean431	7.86576	0.28866	0.000543519	3.64286e-05	8.64306	0.29908	0.0317	0.032
7480	0.21065	1.15421					124.667	0.15024	0.1097	0.06376	0.06168	0.09583	0.07566	0.0416	0.15236	0.10329	0.05301	0.01661	0.05327	0.10142		Mean241	16.6263	0.6059	0.000423493	2.07928e-05	16.9817	0.64615	0.17716	0.17901	0.00543	3.77375e-06			0.00466	0.00468	0	1649			Mean432	11.7801	0.29741	0.000578628	2.60915e-05	12.2886	0.30697	0.04162	0.04201
7520	0.22427	0.92736					125.333	0.1749	0.10216	0.065	0.04955	0.09365	0.06785	0.04567	0.1373	0.11517	0.05926	0.02076	0.05251	0.12017		Mean242	13.4928	0.29591	0.000389128	1.66703e-05	13.8441	0.3149	0.17289	0.1747	0.00544	3.78534e-06			0.00469	0.0047	0	1649			Mean435	12.8775	0.29754	0.00057916	2.3893e-05	13.1664	0.30709	0.03918	0.03955
7560	0.23479	0.98067					126	0.1749	0.08321	0.08001	0.05319	0.09258	0.06565	0.03553	0.15144	0.09416	0.04288	0.01493	0.05327	0.086		Mean243	18.7633	0.44894	0.000391258	1.49595e-05	19.17	0.4859	0.36127	0.36505	0.00546	3.79575e-06			0.00471	0.00473	0	1649			Mean436	16.0964	0.24734	0.000392198	1.29688e-05	16.3245	0.26331	0.13415	0.13541
7600	0.20334	1.09716					126.667	0.16875	0.07816	0.06877	0.052	0.10439	0.0612	0.03653	0.15765	0.10876	0.04442	0.01743	0.05936	0.11249		Mean245	10.7994	0.60543	0.000527363	3.8197e-05	11.4749	0.63198	0.04603	0.04651	0.0055	3.82231e-06			0.00474	0.00475	0	1649			Mean437	42.5621	0.95025	0.000419517	1.04772e-05	42.6209	1.01521	0.13611	0.13739
7640	0.19702	0.99801					127.333	0.16875	0.08072	0.05252	0.04955	0.09471	0.06565	0.0274	0.14527	0.09507	0.04754	0.01907	0.06011	0.09924		Mean249	578.807	31.1263	0.000551727	1.00107e-05	580.351	31.2165	0.20592	0.20807	0.00551	3.82927e-06			0.00476	0.00478	0	1649			Mean443	9.5994	0.34084	0.000771702	4.54473e-05	10.6452	0.34742	0.03669	0.03704
7680	0.18972	1.03024					128	0.18104	0.07816	0.06747	0.04955	0.09689	0.0623	0.03352	0.14347	0.11151	0.06234	0.01243	0.05861	0.11467		Mean252	23.7121	0.3982	0.000343847	1.03357e-05	23.8466	0.4415	0.6024	0.6087	0.00552	3.83646e-06			0.00479	0.0048	0	1649			Mean445	6.6412	0.31709	0.000662146	5.4258e-05	6.90629	0.32507	0.01767	0.01784
7720	0.21484	0.99182					128.667	0.17983	0.09082	0.04751	0.052	0.10551	0.05674	0.03352	0.14172	0.08865	0.04831	0.01907	0.06011	0.086		Mean253	21.0127	0.26676	0.000321466	9.07544e-06	20.9967	0.29027	0.68675	0.69393	0.00553	3.84277e-06			0.00481	0.00483	0	1649			Mean448	6.60775	0.33214	0.000730419	6.15742e-05	6.95187	0.33918	0.0162	0.01635
7760	0.19392	0.83188					129.333	0.1601	0.08826	0.07247	0.04232	0.09689	0.0645	0.03859	0.12399	0.11061	0.04912	0.01825	0.04947	0.10251		Mean254	20.7822	0.44685	0.000320015	1.21263e-05	21.3691	0.50429	0.17078	0.17257	0.00554	3.8512e-06			0.00484	0.00485	0	1649			Mean449	32.2849	0.56439	0.000261843	9.18897e-06	32.443	0.70715	0.14515	0.14651
7800	0.19599	1.06248					130	0.1601	0.08826	0.06747	0.04835	0.11195	0.05565	0.03453	0.14614	0.08594	0.0569	0.01661	0.04947	0.09374		Mean257	19.0112	0.45306	0.000804247	2.86617e-05	21.387	0.46185	0.18708	0.18903	0.00557	3.87113e-06			0.00486	0.00488	0	1649			Mean450	14.3792	0.35753	0.00085466	3.4632e-05	14.5577	0.36337	0.03941	0.03978
7840	0.20018	0.88642					130.667	0.18841	0.08072	0.07247	0.052	0.10439	0.07676	0.03352	0.14172	0.09141	0.05767	0.01411	0.05251	0.10584		Mean258	18.4932	0.32419	0.00045749	1.43696e-05	21.083	0.33975	0.26732	0.27011	0.00558	3.88113e-06			0.00489	0.0049	0	1649			Mean456	191.167	38.3217	0.00123	7.52589e-05	191.652	38.3489	0.02426	0.02449
7880	0.19599	1.12443					131.333	0.18104	0.07443	0.06253	0.04477	0.10551	0.05784	0.03352	0.13642	0.09687	0.05378	0.01575	0.05327	0.08932		Mean259	16.3056	0.41061	0.00045697	1.83894e-05	16.8263	0.4345	0.15554	0.15717	0.0056	3.89391e-06			0.00491	0.00493	0	1649			Mean463	12.0772	1.92859	0.00232	0.000314193	12.7661	1.93793	0.01315	0.01327
7920	0.1719	1.06248					132	0.17368	0.06177	0.07624	0.04716	0.10551	0.05229	0.01827	0.15678	0.10785	0.04831	0.01329	0.06546	0.08818		Mean261	11.767	0.42455	0.000476384	2.68063e-05	12.4728	0.44738	0.06408	0.06475	0.00563	3.91256e-06			0.00494	0.00495	0	1649			Mean464	77.0708	22.6372	0.000939926	9.4878e-05	78.1389	22.6733	0.02398	0.0242
7960	0.16874	0.8988					132.667	0.16132	0.08702	0.07	0.04596	0.09583	0.05894	0.0284	0.13817	0.08684	0.05143	0.01411	0.05707	0.11684		Mean263	38.6439	1.34958	0.000432822	1.41162e-05	39.157	1.40743	0.40733	0.41159	0.00564	3.92237e-06			0.00496	0.00498	0	1649			Mean467	7.71694	0.32837	0.000712972	5.115e-05	8.1237	0.33563	0.02194	0.02215
8000	0.17293	0.91865					133.333	0.16625	0.07816	0.04127	0.04835	0.10439	0.0623	0.0284	0.11602	0.0905	0.046	0.02076	0.05022	0.08709		Mean264	39.9775	1.29328	0.000421669	1.30736e-05	40.4403	1.35316	0.44104	0.44565	0.00565	3.93146e-06			0.00499	0.005	0	1649			Mean471	132.627	2.59225	0.000269852	5.59995e-06	131.503	2.8866	0.37112	0.3746
8040	0.17816	1.04759					134	0.15517	0.06177	0.05876	0.04716	0.08827	0.04674	0.03046	0.13905	0.11517	0.04912	0.01994	0.04947	0.08382		Mean265	10.3224	0.35446	0.000534256	3.08016e-05	12.6034	0.36742	0.22304	0.22537	0.00568	3.95288e-06									Mean474	9.74134	0.25915	0.000433361	2.33807e-05	10.0102	0.27331	0.0323	0.03261
8080	0.17397	1.05378					134.667	0.15889	0.09456	0.05752	0.05565	0.10982	0.04448	0.03146	0.14969	0.09597	0.04912	0.0249	0.04642	0.09701		Mean266	20.5364	0.39494	0.000435038	1.37809e-05	20.9154	0.42018	0.38743	0.39148	0.0057	3.96247e-06									Mean475	38.194	0.55421	0.000297484	7.70329e-06	38.0516	0.65792	0.14754	0.14892
8120	0.1834	0.99182					135.333	0.17611	0.07816	0.06877	0.052	0.09365	0.05003	0.02539	0.11957	0.10419	0.04677	0.01661	0.04947	0.10033		Mean268	33.7805	0.88563	0.000446867	1.30299e-05	34.435	0.93087	0.48681	0.4919	0.00571	3.97153e-06									Mean479	27.4973	0.22292	0.000237859	5.94389e-06	28.5122	0.24289	0.30093	0.30375
8160	0.15615	0.97938					136	0.14038	0.07311	0.05499	0.05804	0.08934	0.05449	0.0274	0.14172	0.08865	0.046	0.01329	0.04567	0.086		Mean269	35.0582	1.19685	0.000422686	1.42794e-05	35.5209	1.25457	0.34298	0.34656	0.00573	3.98146e-06									Mean483	19.782	0.21528	0.00025558	8.13987e-06	19.9751	0.22919	0.13327	0.13452
8200	0.17086	1.11702					136.667	0.17118	0.08446	0.07	0.04112	0.08827	0.0645	0.0274	0.13108	0.09141	0.05301	0.01994	0.04413	0.07826		Mean270	22.8294	0.7234	0.000372328	1.53153e-05	23.0474	0.78187	0.32052	0.32387	0.00574	3.99211e-06									Mean484	32.0819	0.44846	0.000133775	4.78746e-06	28.6176	0.19845	0.39298	0.39666
8240	0.15724	0.93477					137.333	0.16996	0.07567	0.04998	0.052	0.11089	0.04338	0.03046	0.14881	0.09687	0.04519	0.01329	0.04796	0.06949		Mean271	24.0345	0.44222	0.000385056	1.1472e-05	24.4048	0.47991	0.44653	0.45119	0.00575	4.00009e-06									Mean485	8.97627	0.32372	0.000691742	4.23533e-05	9.56031	0.33126	0.02648	0.02673
8280	0.15931	0.85296					138	0.14166	0.08072	0.06123	0.04112	0.1012	0.05119	0.02333	0.12666	0.08409	0.05143	0.01329	0.04492	0.07499		Mean272	11.097	0.37834	0.000597147	3.29058e-05	12.0616	0.38982	0.05636	0.05695	0.00579	4.02297e-06									Mean486	6.82229	0.31634	0.000658863	5.25e-05	8.54291	0.32437	0.0434	0.04381
8320	0.14884	0.95089					138.667	0.15767	0.07062	0.06877	0.04716	0.10764	0.03673	0.02333	0.14439	0.09231	0.03818	0.01329	0.04262	0.08382		Mean273	12.7943	0.34576	0.000511839	2.36088e-05	13.3738	0.35937	0.0986	0.09963	0.00581	4.03939e-06									Mean488	9.10316	0.37277	0.000934878	6.15986e-05	9.63443	0.37804	0.0262	0.02644
8360	0.16874	1.13191					139.333	0.16625	0.07443	0.07124	0.0508	0.08827	0.04228	0.0264	0.13375	0.08865	0.04519	0.01411	0.04872	0.08158		Mean274	4.53919	0.58753	0.0012	0.000215105	5.64112	0.5944	0.0773	0.07811	0.00602	4.18897e-06									Mean489	12.854	0.33918	0.000763726	3.34926e-05	13.196	0.34585	0.04996	0.05043
8400	0.15511	0.95334					140	0.15146	0.07311	0.08001	0.04835	0.07753	0.04784	0.01726	0.14259	0.07862	0.04288	0.02158	0.04872	0.08491		Mean276	15.8216	0.29794	0.000393929	1.43856e-05	16.3383	0.31665	0.27166	0.2745	0.00604	4.19898e-06									Mean490	9.10119	0.21552	0.000261507	1.78529e-05	9.00515	0.23069	0.04893	0.04939
8440	0.14884	0.967					140.667	0.15639	0.07187	0.05999	0.04351	0.09689	0.04003	0.0142	0.14259	0.0896	0.05378	0.01329	0.03957	0.10142		Mean277	18.7644	0.41563	0.000463965	1.6275e-05	19.2046	0.43912	0.23497	0.23742	0.00605	4.2103e-06									Mean491	8.78039	0.26423	0.0004515	2.69561e-05	9.22106	0.27765	0.04331	0.04372
8480	0.13832	1.15421					141.333	0.15517	0.06807	0.05999	0.03747	0.09365	0.05003	0.0274	0.13642	0.09687	0.03899	0.01575	0.03653	0.09041		Mean279	16.1519	0.5352	0.000625728	2.82005e-05	18.1362	0.55281	0.11707	0.1183	0.00608	4.22991e-06									Mean494	40.7082	0.56539	0.000244074	7.37492e-06	39.1402	0.73554	0.18612	0.18786
8520	0.15304	1.08852					142	0.16747	0.07062	0.05252	0.04955	0.0904	0.04894	0.02439	0.13375	0.07586	0.04442	0.01575	0.04567	0.08818		Mean280	15.2366	0.36509	0.000393055	1.66101e-05	15.8051	0.39349	0.27695	0.27985	0.0061	4.24146e-06									Mean497	81.9591	7.75917	0.00105	4.6136e-05	82.5052	7.78543	0.02734	0.0276
8560	0.15511	1.09097					142.667	0.15639	0.05423	0.06623	0.05565	0.09258	0.04448	0.02946	0.13288	0.09326	0.03899	0.01575	0.05097	0.07499		Mean281	8.5553	0.38163	0.000605955	4.34892e-05	10.7253	0.39294	0.11961	0.12086	0.00614	4.2717e-06									Mean501	50.7808	0.73324	0.000334635	6.90645e-06	50.8833	0.8268	0.45714	0.46143
8600	0.13522	0.87901					143.333	0.1601	0.06052	0.07124	0.04477	0.11301	0.03783	0.03146	0.13288	0.08318	0.03506	0.01493	0.05022	0.08158		Mean282	14.9691	0.47692	0.000872867	4.08738e-05	17.2119	0.4852	0.26031	0.26303	0.00618	4.30012e-06									Mean505	13.7606	0.30025	0.000590305	2.2854e-05	14.2749	0.30955	0.04566	0.04609
8640	0.15511	1.07241					144	0.14531	0.04918	0.05622	0.04351	0.10982	0.03228	0.0274	0.12044	0.07586	0.0413	0.01161	0.03728	0.09041		Mean283	21.331	0.28851	0.000284484	8.94866e-06	21.1032	0.32905	0.6789	0.68599	0.00619	4.30635e-06									Mean508	9.69509	0.30257	0.000599897	3.30484e-05	10.4786	0.31167	0.03542	0.03575
8680	0.16667	1.12939					144.667	0.13673	0.06177	0.05622	0.04716	0.1335	0.03783	0.0152	0.1373	0.09231	0.03976	0.01079	0.03882	0.07717		Mean284	24.7838	0.4481	0.000790115	2.14471e-05	27.3093	0.45701	0.20746	0.20963	0.00621	4.32126e-06									Mean510	14.2299	0.21746	0.000278329	1.17348e-05	14.6527	0.23494	0.06688	0.0675
8720	0.15408	1.06125					145.333	0.16625	0.06433	0.06376	0.03509	0.11839	0.03673	0.02233	0.13288	0.09416	0.03506	0.01079	0.04567	0.09041		Mean285	26.4058	0.46609	0.000841598	2.19991e-05	28.5144	0.47458	0.15204	0.15363	0.00624	4.33656e-06									Mean516	102.297	0.61886	0.000189968	3.47282e-06	96.4611	0.96818	1.25915	1.27096
8760	0.12682	0.86037					146	0.15517	0.07187	0.05375	0.04596	0.09689	0.03338	0.02333	0.14084	0.08409	0.04831	0.01329	0.03728	0.07826		Mean286	7.88634	0.35558	0.000537164	4.05823e-05	8.54914	0.36846	0.04153	0.04196	0.00628	4.36478e-06									Mean519	9.76527	0.30158	0.000595783	3.25499e-05	10.0401	0.31076	0.02612	0.02637
8800	0.14361	1.0129					146.667	0.14288	0.07948	0.06623	0.0508	0.09471	0.03557	0.03046	0.12224	0.08228	0.03976	0.00997	0.03957	0.05515		Mean288	27.2703	0.54944	0.00109	3.08498e-05	29.2212	0.55667	0.16551	0.16723	0.00631	4.38623e-06									Mean520	16.4325	0.32467	0.000696064	2.33145e-05	16.6886	0.33216	0.04543	0.04585
8840	0.12999	0.91491					147.333	0.15274	0.05928	0.06253	0.05319	0.08396	0.05449	0.02133	0.14527	0.0905	0.03976	0.01161	0.04033	0.07276		Mean289	45.6167	1.67002	0.000374163	1.24019e-05	45.6278	1.75496	0.52005	0.52548	0.00632	4.39486e-06									Mean522	47.3354	0.50351	0.000276953	5.87647e-06	45.4552	0.61842	0.91042	0.91896
8880	0.13832	0.89383					148	0.14902	0.06938	0.06253	0.04596	0.11195	0.04003	0.02233	0.11869	0.07862	0.03818	0.01329	0.04108	0.08382		Mean290	41.0131	2.72622	0.000494334	2.25725e-05	41.4917	2.78332	0.1824	0.18431	0.00634	4.41056e-06									Mean523	10.4159	0.2206	0.000294836	1.65019e-05	10.9982	0.2391	0.08634	0.08715
8920	0.14252	1.02032					148.667	0.14781	0.05548	0.07124	0.03747	0.0904	0.03338	0.03247	0.14172	0.06488	0.03194	0.01329	0.03882	0.07384		Mean291	41.8198	0.51436	0.000598343	1.02151e-05	44.4489	0.53264	0.25972	0.26243	0.00635	4.41766e-06									Mean527	5.59197	0.33737	0.000755087	7.58811e-05	6.25032	0.34413	0.02006	0.02025
8960	0.13522	0.85419					149.333	0.15146	0.05548	0.04751	0.052	0.09583	0.02337	0.01927	0.12224	0.07586	0.02963	0.01743	0.03348	0.07717		Mean292	29.8944	1.28354	0.000409443	1.70703e-05	30.2114	1.34686	0.27164	0.27448	0.00637	4.42953e-06									Mean529	6.36914	0.25091	0.000404515	3.36386e-05	7.28708	0.26632	0.03835	0.03871
9000	0.12056	0.84922					150	0.14781	0.06807	0.07	0.03747	0.09258	0.03783	0.02033	0.13288	0.09141	0.03587	0.01661	0.03043	0.06175		Mean293	18.7923	0.46356	0.000404656	1.55239e-05	19.1476	0.49905	0.2917	0.29475	0.00639	4.44033e-06									Mean531	11.3736	0.21959	0.000289997	1.49821e-05	11.4317	0.23788	0.09907	0.1
9040	0.1174	1.06989					150.667	0.14653	0.06807	0.06123	0.04596	0.08827	0.02782	0.02033	0.12666	0.07311	0.04053	0.01575	0.03198	0.06507		Mean294	10.5327	0.41984	0.000710497	4.35972e-05	12.1876	0.42956	0.08889	0.08982	0.00643	4.47064e-06									Mean532	17.1551	0.22062	0.00029489	1.00203e-05	17.0664	0.23911	0.24235	0.24462
9080	0.1174	0.8703					151.333	0.15274	0.07443	0.07377	0.04835	0.09583	0.04228	0.01626	0.12399	0.0896	0.04053	0.01329	0.03807	0.07167		Mean295	26.9951	1.01694	0.000435698	1.72748e-05	27.4076	1.06764	0.2667	0.26949	0.00645	4.48266e-06									Mean534	170.784	6.32956	0.00027109	8.21793e-06	169.601	6.78754	0.21558	0.2176
9120	0.11843	1.18148					152	0.15517	0.05298	0.07624	0.052	0.1087	0.04558	0.02333	0.13288	0.08865	0.03899	0.01411	0.04033	0.06949		Mean296	15.4363	0.37747	0.000410492	1.71762e-05	15.8818	0.40446	0.12809	0.12942	0.00646	4.4946e-06									Mean538	10.5533	0.35765	0.000855249	4.72297e-05	10.876	0.36348	0.01843	0.01861
9160	0.12056	0.88268					152.667	0.15889	0.06682	0.05375	0.04351	0.09689	0.02892	0.02539	0.1355	0.08138	0.04442	0.01079	0.02968	0.06066		Mean297	10.5423	0.3623	0.000554673	3.15734e-05	11.1444	0.37472	0.0791	0.07992	0.00649	4.51656e-06									Mean539	18.2136	0.22667	0.000319691	9.88649e-06	18.7486	0.24534	0.1608	0.16231
9200	0.11636	0.96945					153.333	0.12808	0.04669	0.07247	0.03747	0.10333	0.05003	0.01927	0.12753	0.08318	0.03117	0.01493	0.03957	0.06725		Mean298	9.93623	0.48531	0.000559557	3.91599e-05	10.5494	0.50472	0.04416	0.04463	0.00653	4.54379e-06									Mean544	16.7244	0.22363	0.000307834	1.05263e-05	17.9011	0.24237	0.09196	0.09282
9240	0.12786	0.97319					154	0.15146	0.06177	0.05499	0.05565	0.09365	0.04003	0.02033	0.13195	0.06949	0.03429	0.01079	0.03348	0.05624		Mean301	42.0074	0.30119	0.000401651	5.52207e-06	43.7232	0.31946	0.51117	0.51652	0.00654	4.54763e-06									Mean551	3.15811e-07	138013000000000	-1.28277e-12	560582000	22.9497	0.15191	146.915	148.292
9280	0.12159	0.82195					154.667	0.14781	0.06177	0.06877	0.03867	0.10439	0.03338	0.02333	0.13463	0.06764	0.03352	0.01575	0.03502	0.06507		Mean302	17.0363	0.49786	0.000435587	1.8715e-05	17.4662	0.53042	0.20478	0.20692	0.00656	4.56065e-06									Mean553	22.0344	0.2456	0.000193086	6.83184e-06	20.4862	0.21338	0.25817	0.26059
9320	0.11004	0.97442					155.333	0.15767	0.06308	0.06123	0.05319	0.10439	0.03783	0.01626	0.12399	0.08138	0.03976	0.00829	0.03502	0.07058		Mean303	39.4567	1.18252	0.0003619	1.14773e-05	39.5513	1.26165	0.48484	0.4899	0.00657	4.56863e-06									Mean555	8.79821	0.42534	0.00125	9.43251e-05	10.6222	0.42925	0.03406	0.03438
9360	0.10061	0.93232					156	0.14409	0.04918	0.05622	0.04351	0.08609	0.03002	0.01626	0.12578	0.07677	0.03587	0.02158	0.02893	0.06616		Mean304	17.6587	0.89549	0.000481292	2.65731e-05	18.1893	0.93513	0.09096	0.09191	0.0066	4.58711e-06									Mean559	8.7977	0.54618	0.000600199	4.9232e-05	9.1127	0.56977	0.02178	0.02198
9400	0.10165	0.88397					156.667	0.15146	0.05548	0.05999	0.04477	0.09796	0.03557	0.02539	0.12399	0.07772	0.03194	0.00829	0.04033	0.05624		Mean305	11.3918	0.41525	0.000697745	3.93333e-05	12.8963	0.42513	0.12165	0.12292	0.00664	4.61446e-06									Mean560	22.8837	1.82756	0.000466313	3.05498e-05	23.0771	1.89557	0.03511	0.03544
9440	0.11004	1.10831					157.333	0.13673	0.05548	0.04875	0.04835	0.09689	0.03673	0.01827	0.14794	0.07772	0.02728	0.01575	0.02968	0.07608		Mean306	6.98357	0.39182	0.00063343	5.64259e-05	9.08615	0.40263	0.20099	0.20309	0.00669	4.6537e-06									Mean561	27.5616	1.0911	0.000429442	1.77374e-05	28.6406	1.15693	0.0639	0.06449
9480	0.1174	1.06989					158	0.15395	0.05672	0.04875	0.03993	0.10333	0.03338	0.02539	0.14259	0.06398	0.02963	0.01411	0.03807	0.06066		Mean308	17.9819	0.39032	0.000428548	1.54701e-05	18.3809	0.416	0.21074	0.21295	0.00671	4.66446e-06									Mean567	1572.76	1034.32	0.00044517	7.41111e-05	1567.58	1036.04	0.33544	0.33859
9520	0.13102	1.12321					158.667	0.15639	0.04918	0.07377	0.04232	0.07965	0.03228	0.01927	0.13375	0.0722	0.0304	0.01161	0.02893	0.05401		Mean309	11.6688	0.40176	0.000660545	3.56852e-05	14.028	0.41215	0.15941	0.16108	0.00674	4.68927e-06									Mean574	14.004	0.24283	0.000376701	1.44299e-05	14.3516	0.25951	0.0669	0.06752
9560	0.1132	0.84548					159.333	0.14902	0.06938	0.05122	0.04835	0.08184	0.03338	0.02033	0.13195	0.05942	0.03664	0.01743	0.02968	0.05951		Mean311	26.9567	0.25293	0.000183998	5.83728e-06	28.1484	0.27579	0.6035	0.60981	0.00675	4.69333e-06									Mean577	8.2458	0.46037	0.00149	0.000128707	8.65371	0.46365	0.02903	0.0293
9600	0.09015	0.9447					160	0.13916	0.06177	0.05622	0.052	0.08609	0.03228	0.0152	0.13375	0.06764	0.02963	0.01661	0.03882	0.07717		Mean314	21.2244	0.27884	0.00034932	9.61063e-06	21.2681	0.3004	0.5295	0.53503	0.00676	4.70001e-06									Mean578	34.0504	0.34281	0.000308257	6.7149e-06	33.4553	0.40455	0.14984	0.15124
9640	0.10165	0.90499					160.667	0.13673	0.05423	0.06623	0.05565	0.09471	0.03228	0.0132	0.12578	0.07677	0.02805	0.01161	0.02893	0.05515		Mean315	68.2485	1.11985	0.00035775	6.39262e-06	68.9158	1.19903	0.34033	0.34389	0.00677	4.70446e-06									Mean580	53.8069	0.28042	0.000341558	3.91435e-06	53.1538	0.31482	1.03512	1.04482
9680	0.10693	0.97938					161.333	0.13052	0.05423	0.05499	0.05804	0.08184	0.03447	0.00713	0.14527	0.06122	0.02574	0.01493	0.03578	0.06066		Mean316	20.5696	0.45742	0.000816696	2.7068e-05	22.9145	0.4661	0.19749	0.19955	0.00679	4.72328e-06									Mean583	27.1857	0.22952	0.00033023	6.76142e-06	26.7959	0.24798	0.35813	0.36149
9720	0.11947	0.8616					162	0.14653	0.04669	0.06123	0.03509	0.09902	0.02672	0.0142	0.12491	0.06949	0.02493	0.01329	0.03043	0.05515		Mean317	37.501	0.41199	0.000688709	1.17405e-05	40.442	0.42198	0.30023	0.30337	0.0068	4.73145e-06									Mean584	8.59249	0.3139	0.00064818	4.08686e-05	9.15251	0.32211	0.02921	0.02949
9760	0.1174	1.1604					162.667	0.15395	0.04793	0.04751	0.04477	0.09796	0.03228	0.01119	0.12399	0.06764	0.02728	0.02322	0.03423	0.06616		Mean318	16.5918	0.41221	0.000689331	2.65682e-05	19.9563	0.4222	0.30939	0.31263	0.00683	4.74992e-06									Mean587	10.3163	0.34877	0.000810458	4.50429e-05	10.8025	0.35497	0.02874	0.02901
9800	0.10377	1.055					163.333	0.14781	0.05672	0.065	0.03628	0.08934	0.02557	0.0152	0.12399	0.06854	0.02651	0.01661	0.03043	0.05624		Mean319	22.5437	0.28549	0.000364724	9.39603e-06	25.9477	0.30601	0.55384	0.55962	0.00684	4.75646e-06									Mean588	83.3248	1.00966	0.000247998	4.9818e-06	82.997	1.23941	0.25154	0.2539
9840	0.10693	0.98686					164	0.15517	0.06177	0.05252	0.03263	0.08072	0.05449	0.01014	0.1355	0.07586	0.02886	0.01575	0.02893	0.06616		Mean320	27.7566	0.3977	0.000649436	1.46694e-05	30.9906	0.40826	0.29098	0.29402	0.00685	4.76666e-06									Mean591	12.7478	0.26531	0.00045541	1.8721e-05	13.0481	0.27858	0.0955	0.09639
9880	0.09331	1.02406					164.667	0.13794	0.06807	0.04628	0.03509	0.1012	0.03112	0.01626	0.12311	0.06488	0.03976	0.01411	0.03578	0.04959		Mean321	21.4988	0.62255	0.000736421	2.70522e-05	23.4889	0.63815	0.15455	0.15617	0.00688	4.78547e-06									Mean593	16.1121	0.28511	0.000529608	1.72881e-05	16.497	0.29591	0.04808	0.04853
9920	0.10165	1.01161					165.333	0.12565	0.04793	0.05622	0.04477	0.08503	0.02672	0.01827	0.12666	0.07772	0.03429	0.01743	0.04033	0.05842		Mean322	12.0034	0.40695	0.000674786	3.56895e-05	14.5791	0.41713	0.16738	0.16913	0.00692	4.81029e-06									Mean596	23.4787	0.25139	0.0004062	9.15783e-06	23.6919	0.26673	0.13324	0.13449
9960	0.09015	0.91743					166	0.14653	0.05423	0.05499	0.05439	0.09365	0.03002	0.01626	0.14172	0.06674	0.03352	0.01411	0.03118	0.05842		Mean323	17.4521	0.34281	0.000504296	1.7008e-05	19.6097	0.35666	0.15082	0.15239	0.00693	4.82212e-06									Mean601	12.9588	0.42626	0.00125	6.44631e-05	13.9593	0.43014	0.03244	0.03275
10000	0.09222	1.05378					166.667	0.14166	0.05043	0.05876	0.04835	0.08609	0.02892	0.0142	0.12311	0.0713	0.03352	0.01743	0.02434	0.06725		Mean324	14.4377	0.43514	0.000491058	2.26918e-05	14.8274	0.45724	0.11296	0.11415	0.00696	4.8379e-06									Mean604	23.9199	0.2843	0.000348491	8.94263e-06	23.8943	0.318	0.34274	0.34595
10040	0.09854	1.10709					167.333	0.14653	0.05298	0.06123	0.04716	0.08184	0.03338	0.0122	0.13195	0.05485	0.0304	0.01743	0.03043	0.05951		Mean326	27.2596	1.08629	0.000430251	1.75943e-05	27.639	1.13978	0.29075	0.29379	0.00697	4.85013e-06									Mean610	12.2745	0.25454	0.000417174	1.79291e-05	13.4575	0.2694	0.05976	0.06032
10080	0.10377	1.06615					168	0.15767	0.04669	0.04251	0.04232	0.07534	0.03002	0.01726	0.12136	0.05851	0.02963	0.01493	0.02588	0.05401		Mean327	26.3229	1.42922	0.000510773	2.43621e-05	26.9068	1.47269	0.1352	0.13661	0.007	4.86707e-06									Mean612	33.142	0.29425	0.000168338	4.51628e-06	30.3306	0.20713	0.28403	0.28669
10120	0.15639	0.04793					168.667	0.14902	0.06557	0.05752	0.0508	0.08184	0.02337	0.0122	0.14794	0.05942	0.0304	0.01825	0.03198	0.06284		Mean330	102.373	7.75489	0.000461427	1.74915e-05	102.618	7.84548	0.30645	0.30966	0.00702	4.87924e-06									Mean617	131996	51746	0.00156	6.62234e-05	131997	51746.1	0.03175	0.0309
10160	0.13052	0.05043					169.333	0.15639	0.04793	0.05622	0.03628	0.09796	0.04674	0.02033	0.12399	0.06583	0.03117	0.01575	0.02434	0.06066		Mean331	49.2287	2.93745	0.000439535	1.80942e-05	49.8007	3.01132	0.2577	0.26039	0.00703	4.89182e-06									Mean618	20.5934	0.22614	0.000213308	7.42059e-06	19.9642	0.21849	0.28172	0.28436
10200	0.13423	0.05043					170	0.13052	0.05043	0.06877	0.04112	0.08827	0.02557	0.01119	0.11247	0.06949	0.02574	0.01329	0.03198	0.05624		Mean332	16.3149	0.41324	0.00046063	1.85559e-05	16.9335	0.43691	0.19573	0.19777	0.00705	4.90473e-06									Mean619	20.9027	0.21998	0.00029193	8.18016e-06	20.927	0.23837	0.36884	0.3723
10240	0.14038	0.04413					170.667	0.13423	0.05043	0.05499	0.03628	0.07753	0.03557	0.02439	0.12311	0.0722	0.03275	0.01575	0.03502	0.04191		Mean333	39.4491	0.38334	0.000610538	9.52327e-06	41.512	0.39456	0.2697	0.27252	0.00706	4.91135e-06									Mean620	20.8705	0.21543	0.000259893	7.7659e-06	23.2566	0.23028	0.36035	0.36372
10280	0.1318	0.05043					171.333	0.14038	0.04413	0.03997	0.03509	0.0829	0.02001	0.0152	0.12224	0.0713	0.02651	0.01825	0.02129	0.05401		Mean334	18.0085	0.45678	0.000814884	3.08211e-05	20.0983	0.46548	0.20792	0.2101	0.00709	4.93278e-06									Mean621	40.9155	2.08172	0.000283541	1.56638e-05	41.9232	2.31403	0.07023	0.07088
10320	0.14038	0.05043					172	0.1318	0.05043	0.05622	0.04351	0.09689	0.02337	0.02233	0.12311	0.06488	0.02963	0.01907	0.02663	0.05733		Mean335	30.2625	0.44192	0.000772563	1.70233e-05	32.1505	0.45099	0.20426	0.2064	0.00711	4.94462e-06									Mean625	20.9992	0.23922	0.000364257	9.37753e-06	20.7286	0.25644	0.27336	0.27593
10360	0.13423	0.05167					172.667	0.14038	0.05043	0.06123	0.052	0.09365	0.02447	0.01119	0.12578	0.06032	0.02651	0.01493	0.02359	0.05624		Mean336	14.4483	0.41215	0.000689156	3.04994e-05	16.56	0.42214	0.21707	0.21934	0.00714	4.96583e-06									Mean627	6.7656	0.28832	0.00054216	4.22359e-05	6.98585	0.29877	0.02355	0.02377
10400	0.1318	0.05803					173.333	0.13423	0.05167	0.04751	0.04955	0.07753	0.02447	0.02033	0.12578	0.07586	0.02963	0.01493	0.02818	0.06175		Mean337	39.8544	0.34562	0.000365601	5.90169e-06	40.3366	0.37656	0.21171	0.21393	0.00715	4.96993e-06									Mean628	34.4893	1.05999	0.000509412	1.56329e-05	35.6544	1.1063	0.05861	0.05915
10440	0.13545	0.05928					174	0.1318	0.05803	0.05752	0.04351	0.09471	0.02337	0.01626	0.13375	0.05395	0.03194	0.01161	0.02739	0.0485		Mean338	44.6381	0.38922	0.0006264	8.70028e-06	47.2064	0.40016	0.84099	0.84978	0.00716	4.97598e-06									Mean629	16.0143	0.28328	0.000522495	1.71423e-05	16.3466	0.29428	0.04242	0.04281
10480	0.13916	0.04793					174.667	0.13545	0.05928	0.05876	0.04112	0.08721	0.02447	0.0132	0.12224	0.06488	0.02262	0.00915	0.02513	0.04741		Mean339	43.7616	0.26137	0.000171299	3.31979e-06	42.742	0.23664	0.67521	0.68227	0.00716	4.97829e-06									Mean631	10.1328	0.33824	0.000759225	4.21686e-05	10.8823	0.34496	0.05996	0.06052
10520	0.15767	0.04669					175.333	0.13916	0.04793	0.05999	0.04596	0.09365	0.02782	0.0122	0.12224	0.05119	0.02963	0.00915	0.02129	0.05074		Mean340	8.29262	0.40216	0.000661635	5.03239e-05	10.4319	0.41253	0.19389	0.19592	0.00721	5.01329e-06									Mean632	8.61191	0.35783	0.000856187	5.79602e-05	9.78304	0.36365	0.03393	0.03424
10560	0.13301	0.04793					176	0.15767	0.04669	0.05999	0.052	0.09796	0.02557	0.01927	0.11869	0.05761	0.03117	0.01493	0.02208	0.05624		Mean341	8.75391	0.28978	0.000236661	2.11935e-05	9.12951	0.35308	0.08634	0.08724	0.00723	5.02803e-06									Mean634	45.023	0.38081	0.000519843	7.08077e-06	46.1377	0.40214	0.40392	0.40771
10600	0.12437	0.04033					176.667	0.13301	0.04793	0.05876	0.04477	0.0829	0.01666	0.01626	0.12224	0.06398	0.02574	0.01243	0.02818	0.05733		Mean342	12.9623	0.42865	0.000482063	2.46951e-05	13.7944	0.45118	0.09028	0.09122	0.00725	5.0452e-06									Mean638	6.56827	0.33845	0.000760203	6.51597e-05	6.78963	0.34515	0.01712	0.01728
10640	0.13545	0.05298					177.333	0.12437	0.04033	0.06253	0.04716	0.08827	0.03338	0.0152	0.12841	0.06488	0.03275	0.02158	0.01979	0.04632		Mean343	18.6818	0.41707	0.000465968	1.64327e-05	19.1497	0.44044	0.19812	0.20019	0.00727	5.05663e-06									Mean639	11.454	0.31806	0.000666434	3.17076e-05	12.3464	0.32597	0.05755	0.05809
10680	0.15024	0.05167					178	0.13545	0.05298	0.06123	0.0508	0.08827	0.02782	0.01827	0.13375	0.05119	0.02181	0.01994	0.03043	0.05733		Mean345	10.9321	0.4049	0.00066917	3.87524e-05	13.5143	0.41517	0.13214	0.13352	0.00731	5.08358e-06									Mean640	17.8858	0.45705	0.000652915	2.39287e-05	18.183	0.47401	0.05122	0.0517
10720	0.13423	0.04793					178.667	0.15024	0.05167	0.04998	0.04232	0.09583	0.02447	0.00713	0.12578	0.05119	0.02262	0.01243	0.02054	0.05515		Mean346	21.2743	0.29845	0.000395134	1.07303e-05	21.6077	0.31709	0.45647	0.46124	0.00732	5.09104e-06									Mean644	14.1015	0.28371	0.000524156	1.95339e-05	15.219	0.29466	0.08219	0.08296
10760	0.11329	0.05928					179.333	0.13423	0.04793	0.04751	0.04232	0.07534	0.02111	0.02033	0.12933	0.05119	0.02963	0.01329	0.02434	0.04741		Mean349	33.2054	1.98724	0.000468334	2.19379e-05	33.7772	2.04442	0.17984	0.18172	0.00734	5.10629e-06									Mean647	59.7786	1.11907	0.00051436	9.36949e-06	59.5752	1.1656	0.33096	0.33406
10800	0.1293	0.05167					180	0.11329	0.05928	0.04875	0.03747	0.08827	0.03228	0.0152	0.12399	0.06398	0.0304	0.0224	0.02513	0.0485		Mean350	35.0845	2.32459	0.000421878	2.12648e-05	35.5488	2.39893	0.18699	0.18895	0.00736	5.12108e-06									Mean648	6.01294	0.30861	0.000625386	5.59547e-05	6.48937	0.31722	0.02123	0.02143
10840	0.11944	0.04793					180.667	0.1293	0.05167	0.04628	0.04112	0.09258	0.01891	0.02233	0.11869	0.05942	0.02574	0.00665	0.02818	0.04632		Mean351	19.9665	4.00106	0.000637601	7.42414e-05	20.7887	4.04181	0.03635	0.03673	0.00744	5.17271e-06									Mean649	11.4851	0.21542	0.000248104	1.38685e-05	11.2293	0.2273	0.06836	0.06901
10880	0.15146	0.04669					181.333	0.11944	0.04793	0.06253	0.05439	0.11089	0.02227	0.0132	0.1355	0.06764	0.02104	0.01825	0.02513	0.05515		Mean353	194.857	21.878	0.000394307	1.84675e-05	194.414	22.0786	0.36517	0.36898	0.00746	5.18555e-06									Mean651	12.8134	0.2851	0.000529571	2.17371e-05	13.2047	0.2959	0.03199	0.03229
10920	0.13052	0.03784					182	0.15146	0.04669	0.04998	0.04835	0.09365	0.02001	0.02233	0.12224	0.05395	0.03741	0.00829	0.01674	0.03967		Mean355	16.5275	0.38693	0.000423797	1.66204e-05	16.9515	0.41294	0.21376	0.216	0.00747	5.19711e-06									Mean654	31.7544	0.29003	0.000181359	6.6174e-06	30.9028	0.3972	0.22411	0.22622
10960	0.12687	0.05423					182.667	0.13052	0.03784	0.05499	0.0508	0.08934	0.02892	0.0122	0.13288	0.053	0.02651	0.01329	0.02359	0.05074		Mean357	10.4127	0.29878	0.000299308	1.90132e-05	10.6533	0.33744	0.06916	0.06988	0.00749	5.21033e-06									Mean656	22.8159	0.89704	0.000506463	2.14354e-05	24.0106	0.94049	0.03777	0.03813
11000	0.15889	0.04538					183.333	0.12687	0.05423	0.04374	0.03263	0.07859	0.02447	0.00913	0.12491	0.04387	0.02416	0.00915	0.03423	0.04518		Mean360	22.1717	0.33928	0.000495318	1.31104e-05	24.5462	0.35342	0.24056	0.24307	0.00751	5.21945e-06									Mean658	12.059	0.50828	0.00187	0.000121083	12.7295	0.51091	0.02669	0.02694
11040	0.1318	0.04413					184	0.15889	0.04538	0.05375	0.052	0.09365	0.02782	0.01626	0.10538	0.05395	0.02574	0.00997	0.02054	0.05624		Mean361	21.3265	0.4111	0.000457653	1.40851e-05	21.8082	0.43495	0.3803	0.38428	0.00752	5.22924e-06									Mean659	14.4272	0.31526	0.000654113	2.46094e-05	14.6964	0.32337	0.06194	0.06252
11080	0.13673	0.03279					184.667	0.1318	0.04413	0.04498	0.03993	0.0904	0.02557	0.00913	0.11782	0.06217	0.02574	0.01161	0.01979	0.04409		Mean363	10	0.36524	0.000562388	3.38596e-05	12.3744	0.37747	0.1555	0.15713	0.00755	5.25279e-06									Mean662	39.8505	0.68764	0.000394941	9.0679e-06	40.5477	0.75016	0.1334	0.13465
11120	0.13794	0.04793					185.333	0.13673	0.03279	0.05999	0.04835	0.09902	0.03002	0.02133	0.11782	0.06308	0.02181	0.00915	0.02283	0.04741		Mean364	11.9452	0.35164	0.000526954	2.61791e-05	12.5097	0.3648	0.052	0.05255	0.00758	5.271e-06									Mean666	12.4144	0.30415	0.000606518	2.61417e-05	12.7989	0.31312	0.02782	0.02808
11160	0.12315	0.04793					186	0.13794	0.04793	0.04998	0.03263	0.09583	0.02001	0.0152	0.12044	0.04934	0.02651	0.01079	0.03348	0.04741		Mean365	18.3068	0.38309	0.00041839	1.47909e-05	18.7411	0.40948	0.28818	0.29119	0.00759	5.28128e-06									Mean670	23.3925	0.21812	0.00023106	6.65833e-06	24.0415	0.22298	0.26874	0.27126
11200	0.13545	0.04413					186.667	0.12315	0.04793	0.06123	0.03993	0.10551	0.02782	0.00913	0.12491	0.05576	0.02963	0.01907	0.02129	0.05292		Mean367	116.395	2.00133	0.000568671	7.39203e-06	118.699	2.04192	0.53642	0.54203	0.0076	5.28642e-06									Mean674	24.0861	0.26725	0.000462436	1.00564e-05	25.0474	0.28025	0.13883	0.14013
11240	0.12687	0.04033					187.333	0.13545	0.04413	0.04374	0.04596	0.0904	0.01782	0.01014	0.11339	0.06217	0.02339	0.01907	0.02513	0.04518		Mean368	275.204	9.626	0.000360995	6.69191e-06	273.731	9.80857	0.90789	0.91738	0.00761	5.29108e-06									Mean679	24.0349	0.34652	0.000799341	1.89911e-05	25.9761	0.35283	0.22453	0.22664
11280	0.12437	0.05423					188	0.12687	0.04033	0.06376	0.03263	0.08609	0.01891	0.0142	0.10538	0.05485	0.02805	0.01161	0.02513	0.03967		Mean369	89.5515	2.78776	0.000461901	9.959e-06	89.8215	2.85338	0.30199	0.30514	0.00762	5.298e-06									Mean683	48.5442	1.25936	0.000449983	1.12561e-05	50.7739	1.32284	0.08922	0.09006
11320	0.14038	0.04538					188.667	0.12437	0.05423	0.05999	0.04112	0.09583	0.03112	0.0142	0.11689	0.05576	0.02262	0.01329	0.02893	0.05842		Mean370	233.049	22.4637	0.000393428	1.57535e-05	232.288	22.6679	0.42079	0.42519	0.00763	5.30896e-06									Mean684	11.0978	0.23187	0.000338642	1.68424e-05	12.7546	0.25008	0.06452	0.06512
11360	0.13545	0.05803					189.333	0.14038	0.04538	0.06253	0.04477	0.08721	0.01891	0.00813	0.1045	0.05761	0.02886	0.02158	0.01904	0.0485		Mean371	22.6569	0.33617	0.00028431	9.1902e-06	22.4131	0.39037	0.64386	0.65059	0.00764	5.31535e-06									Mean686	32.2921	0.46484	0.000277731	8.25078e-06	32.7867	0.57214	0.16271	0.16424
11400	0.11944	0.04033					190	0.13545	0.05803	0.05622	0.03747	0.10008	0.02337	0.0122	0.09566	0.04297	0.01714	0.01243	0.02513	0.04518		Mean372	16.4693	0.34451	0.000364042	1.42225e-05	16.7559	0.37561	0.29131	0.29436	0.00766	5.32524e-06									Mean687	23.106	0.22842	0.000210016	6.59402e-06	22.434	0.21766	0.27347	0.27603
11440	0.12565	0.04289					190.667	0.11944	0.04033	0.03874	0.04477	0.10227	0.02782	0.01927	0.11689	0.05942	0.02262	0.01243	0.02968	0.03859		Mean373	18.3577	0.34631	0.000366575	1.28458e-05	18.6199	0.37715	0.34998	0.35364	0.00767	5.33417e-06									Mean688	14.1658	0.28434	0.000526598	1.95428e-05	15.5281	0.29522	0.09123	0.09208
11480	0.13673	0.04033					191.333	0.12565	0.04289	0.05122	0.03263	0.08827	0.02672	0.00913	0.10538	0.04844	0.02574	0.00829	0.02968	0.05733		Mean374	23.1629	0.62473	0.000434925	1.54601e-05	23.5725	0.66372	0.31836	0.32169	0.00769	5.34492e-06									Mean693	25.7286	0.25706	0.00042601	8.71538e-06	26.7079	0.27153	0.11056	0.11159
11520	0.11579	0.04413					192	0.13673	0.04033	0.04498	0.04351	0.10333	0.02557	0.01014	0.10893	0.05942	0.02027	0.01661	0.02818	0.04409		Mean375	24.9479	0.82529	0.000453254	1.71629e-05	25.3273	0.86778	0.20981	0.212	0.0077	5.35686e-06									Mean695	54.9538	0.79323	0.000346197	6.73441e-06	55.3199	0.88358	0.20068	0.20257
11560	0.13301	0.03528					192.667	0.11579	0.04413	0.05252	0.04596	0.08072	0.02557	0.0142	0.11339	0.05666	0.02493	0.01575	0.02054	0.043		Mean376	8.9456	0.35145	0.000526459	3.49179e-05	11.4934	0.36462	0.20486	0.207	0.00774	5.38114e-06									Mean697	8.90264	0.29696	0.000576795	3.43999e-05	10.1231	0.30656	0.04603	0.04646
11600	0.13673	0.04669					193.333	0.13301	0.03528	0.04751	0.04716	0.10658	0.03002	0.01119	0.10363	0.04207	0.02416	0.01493	0.02129	0.03641		Mean377	16.9285	0.49692	0.00057514	2.38725e-05	17.7425	0.51585	0.1223	0.12358	0.00776	5.39774e-06									Mean698	12.8631	0.25768	0.000428174	1.75125e-05	13.4632	0.27206	0.0414	0.04178
11640	0.15146	0.03784					194	0.13673	0.04669	0.06253	0.04835	0.08184	0.01666	0.0152	0.10096	0.03931	0.02181	0.01329	0.02129	0.05074		Mean378	14.0463	0.34568	0.000511611	2.14931e-05	14.5428	0.35929	0.18867	0.19064	0.00778	5.41269e-06									Mean700	13.3881	0.28368	0.000524053	2.05705e-05	13.9496	0.29464	0.04653	0.04697
11680	0.14781	0.06682					194.667	0.15146	0.03784	0.04628	0.03747	0.09258	0.01336	0.01014	0.09387	0.04573	0.02886	0.01243	0.01828	0.04191		Mean379	210.549	52.8772	0.000619787	4.58456e-05	211.205	52.9559	0.08018	0.08102	0.00783	5.44457e-06									Mean706	17.542	0.26061	0.000438559	1.31275e-05	18.3407	0.27455	0.147	0.14837
11720	0.14409	0.04918					195.333	0.14781	0.06682	0.04628	0.05684	0.07428	0.02001	0.0122	0.11427	0.04663	0.02416	0.01493	0.03578	0.03641		Mean380	25.7546	0.48437	0.000423515	1.19585e-05	26.2377	0.51801	0.4865	0.49158	0.00784	5.45288e-06									Mean707	14.5641	0.24816	0.000395009	1.44184e-05	16.3004	0.264	0.09215	0.09301
11760	0.12437	0.05672					196	0.14409	0.04918	0.0375	0.04835	0.09796	0.02227	0.00713	0.10718	0.04573	0.02104	0.01493	0.01749	0.04959		Mean381	22.8179	0.3982	0.000343847	1.07407e-05	22.9194	0.4415	0.44289	0.44752	0.00785	5.46035e-06									Mean728	16.6494	0.23529	0.000350655	1.1502e-05	17.055	0.25306	0.11498	0.11605
11800	0.13301	0.03659					196.667	0.12437	0.05672	0.04498	0.04596	0.10439	0.02111	0.0132	0.1116	0.05576	0.02339	0.01661	0.02208	0.03199		Mean382	8.07197	0.59911	0.00123	0.000126283	9.27603	0.60588	0.07663	0.07743	0.00798	5.54817e-06									Mean733	60.2982	2.27604	0.000251031	1.14042e-05	58.4445	2.61171	0.15611	0.15757
11840	0.14288	0.03528					197.333	0.13301	0.03659	0.04751	0.03867	0.09471	0.02001	0.01119	0.11602	0.04207	0.02651	0.01411	0.02208	0.04191		Mean383	18.8804	0.42199	0.000716508	2.46014e-05	20.9211	0.43164	0.14318	0.14467	0.008	5.56528e-06									Mean736	25.8595	0.23229	0.000340154	7.24995e-06	26.3966	0.25045	0.14252	0.14386
11880	0.13052	0.03784					198	0.14288	0.03528	0.06123	0.03867	0.08072	0.01446	0.0152	0.10718	0.04478	0.02728	0.01907	0.02513	0.04409		Mean384	10.2614	0.45098	0.000798296	5.25513e-05	10.9396	0.45981	0.04847	0.04898	0.00806	5.60182e-06									Mean742	8.6063	0.33626	0.000749785	4.88647e-05	9.39754	0.34307	0.02752	0.02778
11920	0.14038	0.05043					198.667	0.13052	0.03784	0.05876	0.05439	0.10764	0.02337	0.00913	0.10538	0.03931	0.01791	0.01161	0.01599	0.02867		Mean386	19.6749	0.23479	0.000235139	8.03571e-06	20.37	0.25913	0.1814	0.1833	0.00806	5.60741e-06									Mean743	8.35338	0.29996	0.000589095	3.75586e-05	8.7353	0.30929	0.02569	0.02593
11960	0.11579	0.04289					199.333	0.14038	0.05043	0.04751	0.05319	0.09152	0.02337	0.0152	0.09299	0.0521	0.01949	0.00915	0.02208	0.04741		Mean387	14.4384	0.34298	0.000504737	2.05792e-05	15.3994	0.35682	0.05715	0.05774	0.00808	5.62172e-06									Mean745	15.8601	0.23523	0.000350477	1.20701e-05	16.4369	0.25302	0.07415	0.07484
12000	0.14038	0.03154					200	0.11579	0.04289	0.04751	0.04477	0.08396	0.02227	0.01014	0.10008	0.03931	0.02104	0.01493	0.01979	0.03641		Mean388	22.8589	0.58432	0.000410161	1.45139e-05	23.2367	0.62615	0.32297	0.32635	0.0081	5.63182e-06									Mean747	22.6973	0.96283	0.000978444	4.22254e-05	23.696	0.97924	0.04891	0.04936
12040	0.10964	0.04289					200.667	0.14038	0.03154	0.05252	0.04596	0.09365	0.01336	0.0132	0.10805	0.04478	0.01325	0.01661	0.01828	0.02867		Mean389	15.2859	0.29377	0.000384088	1.45334e-05	15.5073	0.31307	0.30249	0.30565	0.00811	5.64192e-06									Mean748	9.47622	0.28475	0.000528197	2.93098e-05	10.5351	0.29559	0.0374	0.03775
12080	0.10592	0.05167					201.333	0.10964	0.04289	0.04251	0.04232	0.09583	0.01446	0.0132	0.10363	0.04663	0.02416	0.01575	0.01979	0.03417		Mean390	11.8969	1.38244	0.00078107	7.97262e-05	12.6307	1.40519	0.04415	0.04461	0.00819	5.69737e-06									Mean749	128.763	11.5985	0.000897167	3.30721e-05	129.98	11.633	0.04808	0.04853
12120	0.12315	0.03403					202	0.10592	0.05167	0.04498	0.04477	0.07753	0.02672	0.00713	0.11782	0.05666	0.01714	0.01575	0.02283	0.0375		Mean392	25.3123	0.42305	0.000719465	1.84533e-05	27.5293	0.43267	0.17688	0.17872	0.00821	5.7102e-06									Mean752	303.109	5.02955	0.000534893	4.91903e-06	304.142	5.10062	0.97244	0.98156
12160	0.11822	0.05043					202.667	0.12315	0.03403	0.06877	0.03628	0.07965	0.02337	0.01014	0.09741	0.04478	0.02416	0.01661	0.02818	0.0375		Mean393	132.222	2.6722	0.000624596	8.48351e-06	134.017	2.7102	0.26223	0.26497	0.00822	5.7161e-06									Mean755	25605.2	12904.1	0.0022	0.000138787	25605.7	12904.1	0.04473	0.04515
12200	0.117	0.04669					203.333	0.11822	0.05043	0.04751	0.052	0.09583	0.02447	0.00813	0.11514	0.04573	0.02574	0.01329	0.02129	0.03199		Mean395	14.7342	0.39175	0.000430559	1.8981e-05	15.3433	0.41729	0.17173	0.17352	0.00824	5.7293e-06									Mean757	20.9264	0.22364	0.000307871	8.41326e-06	21.4236	0.24238	0.12071	0.12184
12240	0.12687	0.03659					204	0.117	0.04669	0.0375	0.03509	0.08072	0.02111	0.00607	0.09566	0.04021	0.02493	0.01329	0.01979	0.03308		Mean397	10.6558	0.93228	0.000598448	5.4648e-05	11.2696	0.96026	0.04701	0.0475	0.00829	5.7673e-06									Mean770	14.058	0.25585	0.000421747	1.58071e-05	14.8522	0.2705	0.06289	0.06348
12280	0.12315	0.04289					204.667	0.12687	0.03659	0.05252	0.05804	0.09902	0.01556	0.01119	0.10805	0.05119	0.01949	0.01575	0.02129	0.03859		Mean399	25.4837	0.23948	0.00028661	6.66526e-06	24.9865	0.259	1.10872	1.12031	--	--									Mean771	14.6581	0.27607	0.000495055	1.7695e-05	15.598	0.28793	0.10158	0.10253
12320	0.14038	0.04918					205.333	0.12315	0.04289	0.04374	0.04477	0.09583	0.01666	0.01119	0.09741	0.04573	0.02339	0.01493	0.01524	0.03308		Mean401	26.9631	0.291	0.00037758	8.10832e-06	28.9045	0.31069	0.17694	0.17879	0.0083	5.77294e-06									Mean772	29.697	0.48283	0.00111	2.61358e-05	31.283	0.48984	0.13568	0.13696
12360	0.12072	0.0303					206	0.14038	0.04918	0.05252	0.03263	0.10227	0.01556	0.00607	0.10805	0.03475	0.02027	0.01329	0.01369	0.04741		Mean402	43.1578	2.41213	0.000517295	2.05995e-05	43.6962	2.4627	0.2246	0.22695	0.00832	5.78726e-06									Mean775	4.75269	0.3495	0.000814121	9.8344e-05	6.14367	0.35568	0.03014	0.03043
12400	0.10836	0.03279					206.667	0.12072	0.0303	0.05252	0.04351	0.08721	0.01891	0.00913	0.11339	0.03841	0.02574	0.00747	0.01749	0.03526		Mean403	16.2543	0.5816	0.000507732	2.40431e-05	16.8861	0.60918	0.11329	0.11447	0.00835	5.80398e-06									Mean776	20.5736	0.25718	0.000426436	1.0909e-05	22.4356	0.27164	0.10806	0.10907
12440	0.11451	0.04538					207.333	0.10836	0.03279	0.04628	0.05439	0.0904	0.01226	0.01014	0.11339	0.03199	0.02104	0.01161	0.01294	0.05401		Mean404	11.9592	0.36396	0.000559029	2.81032e-05	12.5227	0.37627	0.07555	0.07634	0.00837	5.82353e-06									Mean777	31.436	0.39867	0.000815266	1.59179e-05	32.1452	0.40749	0.07348	0.07417
12480	0.1293	0.04033					208	0.11451	0.04538	0.03874	0.03993	0.08609	0.02227	0.00713	0.1116	0.04753	0.02416	0.01243	0.01674	0.03859		Mean405	9.84012	0.50396	0.000584533	4.2008e-05	10.3012	0.52262	0.04541	0.04588	0.00842	5.85274e-06									Mean786	18.9337	0.3802	0.000975629	3.1357e-05	19.2946	0.38523	0.10754	0.10854
12520	0.11822	0.03403					208.667	0.1293	0.04033	0.03874	0.04596	0.07641	0.02227	0.01014	0.1045	0.03655	0.01637	0.01493	0.01828	0.03308		Mean407	17.3019	0.32246	0.000453228	1.52024e-05	17.724	0.3382	0.21723	0.2195	0.00843	5.86331e-06									Mean787	19.7589	0.22045	0.000294126	8.68783e-06	21.3951	0.23892	0.18337	0.18508
12560	0.12687	0.03528					209.333	0.11822	0.03403	0.04751	0.03509	0.0904	0.01446	0.01119	0.11427	0.04021	0.02027	0.01493	0.02513	0.04082		Mean408	12.0547	0.32899	0.000469426	2.2683e-05	12.809	0.34407	0.05622	0.05681	0.00845	5.87909e-06									Mean788	154.323	3.64879	0.000268156	6.09576e-06	151.053	4.00369	0.20851	0.21047
12600	0.12808	0.05298					210	0.12687	0.03528	0.03997	0.03509	0.08396	0.01336	0.0152	0.10275	0.04663	0.02416	0.01079	0.02054	0.043		Mean410	18.1936	0.29221	0.000380424	1.2101e-05	18.4999	0.31173	0.42096	0.42536	0.00847	5.8875e-06									Mean792	101.072	1.86834	0.00107	1.52611e-05	101.386	1.8874	0.13409	0.13534
12640	0.11944	0.04289					210.667	0.12808	0.05298	0.03997	0.04232	0.08721	0.01666	0.0152	0.11514	0.04478	0.02886	0.01575	0.02208	0.02758		Mean412	32.9832	0.39837	0.000651262	1.23906e-05	35.3007	0.40889	0.38281	0.38681	0.00848	5.89612e-06									Mean794	13.8894	2.23053	0.0021	0.000264386	14.261	2.2412	0.0106	0.0107
12680	0.12808	0.04413					211.333	0.11944	0.04289	0.05375	0.03867	0.1012	0.01336	0.01014	0.09387	0.05395	0.02339	0.01907	0.01369	0.0375		Mean413	12.3639	0.44648	0.00050669	2.75792e-05	13.1445	0.46787	0.08559	0.08648	0.00851	5.9153e-06									Mean796	15.1378	0.28755	0.000539144	1.87616e-05	18.1732	0.29809	0.10701	0.10802
12720	0.11822	0.03279					212	0.12808	0.04413	0.04628	0.03747	0.10333	0.01446	0.0122	0.09654	0.03384	0.02027	0.00997	0.02054	0.03417		Mean414	12.1329	0.58233	0.000508337	3.22642e-05	12.6983	0.60987	0.07827	0.07909	0.00854	5.93773e-06									Mean799	11.4915	0.22886	0.000327806	1.59194e-05	12.8022	0.24737	0.11712	0.11822
12760	0.15639	0.04413					212.667	0.11822	0.03279	0.03126	0.04596	0.0829	0.01226	0.00913	0.10538	0.04021	0.02104	0.01329	0.02588	0.02867		Mean415	24.5177	0.42573	0.000478021	1.29201e-05	25.1282	0.44847	0.32532	0.32872	0.00855	5.94672e-06									Mean800	8.27011	0.305	0.000610108	3.95137e-05	9.19611	0.3139	0.03077	0.03106
12800	0.12808	0.03528					213.333	0.15639	0.04413	0.04374	0.05319	0.08184	0.02557	0.00507	0.09741	0.03109	0.02027	0.01079	0.02283	0.03199		Mean416	7.99961	0.36325	0.00055716	4.18397e-05	10.3911	0.37561	0.18157	0.18347	0.00859	5.97581e-06									Mean802	27.8691	0.51997	0.000283658	1.01619e-05	28.7624	0.63105	0.13841	0.13971
12840	0.12072	0.04538					214	0.12808	0.03528	0.04751	0.03747	0.07965	0.02111	0.0142	0.09036	0.04478	0.02416	0.01411	0.02129	0.0375		Mean417	14.5819	0.39279	0.000432024	1.92538e-05	15.1625	0.41823	0.12778	0.12911	0.00861	5.9892e-06									Mean808	6.73771	0.3513	0.000823094	7.03651e-05	7.0708	0.3574	0.01488	0.01501
12880	0.11207	0.03784					214.667	0.12072	0.04538	0.04498	0.04232	0.09365	0.02447	0.00306	0.11869	0.04663	0.01872	0.01493	0.01749	0.0375		Mean418	9.52606	0.33119	0.000474931	2.90824e-05	11.871	0.34606	0.24612	0.2487	0.00864	6.00943e-06									Mean809	5.17907	0.34998	0.000816471	9.05857e-05	6.59809	0.35613	0.03235	0.03265
							215.333	0.11207	0.03784	0.04127	0.03867	0.08721	0.01556	0.01119	0.10188	0.03565	0.02262	0.01161	0.01904	0.03859		Mean419	13.0348	0.41405	0.000461767	2.32947e-05	13.4936	0.43766	0.16994	0.17171	0.00866	6.02563e-06									Mean810	20.1735	0.73791	0.00109	4.67002e-05	21.2104	0.74996	0.03953	0.0399
																						Mean420	12.6568	0.74562	0.000504164	3.49307e-05	13.09	0.77867	0.07177	0.07252	0.0087	6.04992e-06									Mean812	13.5528	0.29161	0.000555215	2.16467e-05	13.6655	0.30173	0.11599	0.11707
																						Mean421	24.307	0.34292	0.000504566	1.22192e-05	26.5723	0.35675	0.2996	0.30273	0.00871	6.05842e-06									Mean820	9.2483	0.30927	0.000628216	3.65754e-05	10.7195	0.31783	0.04382	0.04423
																						Mean424	13.7027	0.49307	0.000431316	2.29852e-05	18.1127	0.526	0.1575	0.15915	0.00873	6.0744e-06									Mean822	16.3376	0.64524	0.000318708	1.97767e-05	16.431	0.74249	0.03987	0.04024
																						Mean425	15.3391	0.30648	0.000414292	1.55991e-05	15.8431	0.32406	0.21655	0.21881	0.00875	6.08525e-06									Mean823	28.1826	0.23272	0.000341656	6.67243e-06	28.2472	0.25083	0.37808	0.38162
																						Mean426	52.5783	2.35418	0.000489463	1.59234e-05	53.0889	2.40976	0.36264	0.36643	0.00877	6.09632e-06									Mean826	14.0373	0.40013	0.00109	4.91612e-05	14.5751	0.40461	0.03617	0.03651
																						Mean427	40.2532	0.27945	0.00027108	4.59309e-06	41.3892	0.32157	0.33837	0.34191	0.00877	6.09951e-06									Mean827	22.8173	0.22978	0.000331159	8.07068e-06	23.1416	0.24821	0.20684	0.20878
																						Mean429	33.0589	1.34834	0.000422017	1.62072e-05	33.4664	1.40912	0.2602	0.26292	0.00879	6.11079e-06									Mean829	8.23675	0.30382	0.000605148	3.92967e-05	8.77204	0.31282	0.02829	0.02855
																						Mean430	45.2252	3.52491	0.00052475	2.53656e-05	45.9738	3.57997	0.1476	0.14914	0.00881	6.12842e-06									Mean831	39.4831	0.55803	0.000120292	3.9898e-06	33.6568	0.19509	0.39046	0.39412
																						Mean431	26.4523	0.51177	0.000974586	2.71191e-05	28.4603	0.51947	0.16333	0.16503	0.00884	6.14728e-06									Mean834	10.9463	0.22959	0.000330476	1.68005e-05	11.4442	0.24804	0.07706	0.07779
																						Mean432	81.2275	3.93409	0.0004103	1.27392e-05	81.4856	4.02873	0.50212	0.50737	0.00885	6.15614e-06									Mean835	47.3768	2.76479	0.000372687	1.71644e-05	49.5276	2.89669	0.12822	0.12943
																						Mean433	63.9821	5.85913	0.00059054	2.79105e-05	64.6946	5.9099	0.11685	0.11807	0.00888	6.17555e-06									Mean836	16.9402	0.25511	0.000419152	1.30456e-05	18.4331	0.26987	0.12078	0.12191
																						Mean434	14.6561	0.37213	0.00058059	2.40422e-05	15.327	0.38395	0.07994	0.08077	0.0089	6.19227e-06									Mean837	2376.59	311.729	0.000849126	2.30338e-05	2377.45	311.8	0.04748	0.04792
																						Mean435	36.8002	3.00009	0.000550031	2.92214e-05	37.461	3.04843	0.14998	0.15155	0.00893	6.21259e-06									Mean839	13.14	0.24765	0.00039327	1.59226e-05	14.7727	0.26358	0.09133	0.09219
																						Mean436	8.79318	0.27286	0.000335527	2.24326e-05	9.6864	0.29538	0.07596	0.07675	0.00896	6.22819e-06									Mean840	11.9625	0.26406	0.000450877	1.97596e-05	13.0046	0.2775	0.119	0.12012
																						Mean437	16.1646	0.60655	0.000528275	2.55828e-05	16.7848	0.63305	0.10219	0.10326	0.00898	6.24598e-06									Mean843	87.8678	0.4631	0.000276931	3.026e-06	84.9583	0.57083	2.59162	2.61592
																						Mean438	6.51427	0.27484	0.000391745	3.32871e-05	8.75823	0.2894	0.11558	0.11679	0.00902	6.26913e-06									Mean845	57.2988	0.67693	0.000309434	5.75612e-06	57.9772	0.78411	0.31414	0.31709
																						Mean441	41.8177	2.25785	0.000459495	1.8587e-05	42.3863	2.31976	0.24535	0.24792	0.00903	6.28206e-06									Mean847	11.8165	0.29854	0.000583277	2.62502e-05	12.1412	0.308	0.08244	0.08321
																						Mean442	130.077	7.53816	0.000456475	1.33921e-05	130.629	7.6302	0.33875	0.34229	0.00905	6.29137e-06									Mean848	7.17553	0.38155	0.000983132	8.35968e-05	7.96201	0.38654	0.02345	0.02367
																						Mean444	63.2289	1.66569	0.000358603	8.74099e-06	63.0187	1.75883	1.06683	1.07798	--	--									Mean849	9.49165	0.2929	0.000560365	3.1229e-05	9.81954	0.30288	0.02271	0.02292
																						Mean445	35.4008	2.82306	0.00055805	2.95917e-05	36.2309	2.86941	0.1061	0.1072	0.00908	6.31195e-06									Mean850	7.90601	0.25524	0.000419622	2.79808e-05	8.29936	0.26999	0.04614	0.04657
																						Mean446	18.4293	0.39272	0.000431929	1.52305e-05	18.9457	0.41817	0.33864	0.34218	0.00909	6.32254e-06									Mean851	16.8078	0.42785	0.000373055	1.62897e-05	17.5027	0.47826	0.05429	0.0548
																						Mean447	460.922	59.5647	0.000489108	1.95229e-05	461.295	59.7212	0.32124	0.3246	0.00911	6.33612e-06									Mean856	6.59115	0.30736	0.000620055	5.05315e-05	7.61506	0.31606	0.02923	0.0295
																						Mean448	12.6556	0.45495	0.000809655	4.34621e-05	14.2627	0.46369	0.14655	0.14808	0.00915	6.36634e-06									Mean857	16.6236	0.22743	0.000322548	1.08922e-05	16.6081	0.24606	0.11584	0.11692
																						Mean449	32.4233	0.57834	0.00117	2.90823e-05	34.4491	0.58529	0.29471	0.29779	0.00918	6.38656e-06									Mean859	88.0412	1.50098	0.000499405	7.38541e-06	88.7368	1.55615	0.16371	0.16525
																						Mean450	13.562	0.4373	0.000759483	3.70979e-05	15.5363	0.44649	0.18365	0.18557	0.00922	6.41236e-06									Mean862	9.16688	0.42814	0.00127	9.23669e-05	10.287	0.43199	0.02788	0.02814
																						Mean451	42.6389	2.65705	0.000451229	1.99432e-05	42.9849	2.72477	0.24478	0.24734	0.00924	6.42623e-06									Mean863	42.363	0.31576	0.000404352	5.74267e-06	41.8375	0.34431	0.78365	0.791
																						Mean452	8.19277	0.33079	0.000344682	2.71618e-05	10.9553	0.36394	0.15626	0.15789	0.00927	6.44512e-06									Mean864	33.5148	0.58507	0.00034844	9.37564e-06	34.1507	0.65972	0.09879	0.09972
																						Mean455	49.3867	2.88482	0.000427852	1.75081e-05	49.8347	2.96252	0.2288	0.23119	0.00929	6.45729e-06									Mean866	21.0646	1.27259	0.00113	6.21051e-05	21.5085	1.28838	0.01873	0.0189
																						Mean456	4.68461	0.27913	0.000223893	3.85491e-05	6.7884	0.34362	0.09556	0.09656	0.00932	6.4841e-06									Mean868	8.8071	0.21901	0.000287087	1.92489e-05	10.1339	0.23715	0.07671	0.07743
																						Mean459	18.1137	0.29693	0.000391553	1.2492e-05	18.3417	0.31578	0.4254	0.42985	0.00934	6.49279e-06									Mean869	9.97408	0.28615	0.000533643	2.8158e-05	10.1782	0.29683	0.03859	0.03895
																						Mean460	17.5762	0.38399	0.000612276	2.14531e-05	19.888	0.39517	0.20926	0.21144	0.00936	6.50771e-06									Mean870	9.04201	0.28961	0.000547265	3.19305e-05	10.2546	0.29993	0.04124	0.04163
																						Mean461	15.0163	0.33032	0.000472755	1.83543e-05	15.6223	0.34528	0.18133	0.18322	0.00938	6.52047e-06									Mean873	15.6142	0.30039	0.000590878	2.01634e-05	15.8725	0.30968	0.07164	0.07231
																						Mean462	16.1765	0.29805	0.000394187	1.4079e-05	16.5926	0.31674	0.286	0.28899	0.00939	6.53026e-06									Mean876	34.9456	0.44607	0.00063404	1.1765e-05	35.2783	0.4635	0.22645	0.22857
																						Mean463	13.6743	0.44812	0.000508946	2.50799e-05	14.2627	0.46941	0.08907	0.09	0.00942	6.5477e-06									Mean877	19.4478	0.23306	0.000342848	9.69252e-06	19.0312	0.25112	0.35012	0.3534
																						Mean464	4.43402	0.44456	0.000780036	0.000117751	5.31832	0.45355	0.03711	0.0375	0.00953	6.62959e-06									Mean880	28.1938	0.25595	0.000296351	6.78451e-06	28.2144	0.29452	0.1964	0.19824
																						Mean465	36.9761	2.41053	0.000484955	2.28147e-05	37.5074	2.46752	0.17863	0.1805	0.00956	6.64545e-06									Mean885	25.5141	0.78923	0.00036874	1.48019e-05	25.4843	0.86748	0.0695	0.07015
																						Mean466	17.3334	0.36545	0.000562965	1.95593e-05	19.7442	0.37768	0.17262	0.17443	0.00958	6.65906e-06									Mean886	16.5979	0.26248	0.000445228	1.40718e-05	17.5944	0.27615	0.07746	0.07819
																						Mean467	34.6343	0.4164	0.000465044	8.84248e-06	36.2967	0.43983	0.16393	0.16564	0.00958	6.6652e-06									Mean887	17.1092	0.43811	0.000620289	2.33288e-05	18.415	0.4559	0.0576	0.05814
																						Mean469	25.0648	2.21675	0.000599381	3.83424e-05	25.6368	2.25521	0.06978	0.07051	0.00962	6.69187e-06									Mean894	13.2886	0.29423	0.000565745	2.25466e-05	13.582	0.30409	0.04106	0.04144
																						Mean470	9.24934	0.56395	0.00113	9.64005e-05	11.1483	0.57103	0.1699	0.17167	0.00972	6.75891e-06									Mean896	16.0251	0.2519	0.00040795	1.34671e-05	17.1576	0.26716	0.10588	0.10687
																						Mean471	14.9069	0.4902	0.000566142	2.65249e-05	15.6141	0.50941	0.11983	0.12108	0.00975	6.77735e-06									Mean898	142.028	19.1843	0.000640366	3.19444e-05	142.971	19.2544	0.03318	0.03349
																						Mean472	23.8537	0.30519	0.000308469	8.49336e-06	23.6725	0.34269	0.71403	0.72149	0.00975	6.78326e-06									Mean901	6.64056	0.37	0.000919963	8.26519e-05	7.60303	0.37536	0.02455	0.02478
																						Mean473	26.1458	0.32786	0.000340547	8.41906e-06	26.1295	0.36147	0.83689	0.84564	0.00976	6.78911e-06									Mean904	15.8622	0.3013	0.000594644	1.99945e-05	16.1817	0.31051	0.04539	0.04581
																						Mean474	20.4355	0.35921	0.000384769	1.21133e-05	20.7969	0.38834	0.45862	0.46342	0.00977	6.79754e-06									Mean906	345.611	23.31	0.00044499	1.21819e-05	346.739	23.5064	0.11489	0.11597
																						Mean475	38.1936	1.29637	0.000328237	1.19726e-05	38.0931	1.39856	0.55976	0.56561	0.00979	6.80586e-06									Mean907	28.4262	1.18041	0.00362	0.000175389	30.2898	1.18506	0.05564	0.05616
																						Mean476	17.5036	0.34858	0.000369776	1.35879e-05	17.9053	0.3791	0.21433	0.21657	0.0098	6.81531e-06									Mean908	10.3011	0.29077	0.000551876	2.82893e-05	11.0454	0.30097	0.02769	0.02795
																						Mean477	13.891	0.30561	0.000412211	1.71377e-05	14.3495	0.32331	0.22	0.2223	0.00982	6.82723e-06									Mean911	7.21665	0.37066	0.000923504	7.64438e-05	8.69696	0.376	0.04026	0.04064
																						Mean478	23.1879	0.51684	0.000989527	3.16318e-05	25.3163	0.52447	0.2093	0.21149	0.00985	6.84923e-06									Mean913	12.2745	0.27364	0.000485962	2.07339e-05	12.5654	0.2858	0.04653	0.04697
																						Mean479	11.2878	0.49494	0.000572489	3.55731e-05	11.8187	0.51395	0.06653	0.06722	0.00988	6.87396e-06									Mean918	11.9045	0.27881	0.000505383	2.22607e-05	12.8117	0.29033	0.03853	0.03889
																						Mean480	22.5883	0.31976	0.000329119	9.45818e-06	22.6205	0.35471	0.64728	0.65404	0.00989	6.88054e-06									Mean932	6.6984	0.33122	0.000726137	6.02935e-05	8.01866	0.33831	0.03429	0.03461
																						Mean481	15.9321	0.47176	0.000857931	3.74699e-05	17.5456	0.48013	0.13649	0.13792	0.00993	6.9066e-06									Mean934	12.2184	0.26492	0.000453993	1.94736e-05	12.734	0.27824	0.04031	0.04069
																						Mean482	11.7885	0.5052	0.0009553	5.91078e-05	13.7596	0.51299	0.15627	0.1579	0.00999	6.9477e-06									Mean938	57.2685	0.23624	0.000249945	3.06692e-06	55.7762	0.27455	1.06066	1.0706
																						Mean483	5.90732	0.29904	0.000396543	3.87777e-05	8.05811	0.3176	0.15552	0.15715	0.01003	6.97467e-06									Mean940	9.51494	0.24759	0.000393063	2.19793e-05	10.4819	0.26352	0.06846	0.0691
																						Mean484	42.4395	0.37349	0.00058422	8.36831e-06	43.8941	0.38524	0.63466	0.6413	0.01004	6.98049e-06									Mean941	7.76126	0.27531	0.000492182	3.32198e-05	8.0923	0.28725	0.02861	0.02888
																						Mean485	49.0177	1.48677	0.000816937	2.11525e-05	52.2813	1.50885	0.21798	0.22026	0.01006	6.9952e-06									Mean942	160.406	4.36792	0.000633334	9.66468e-06	161.168	4.41702	0.19651	0.19835
																						Mean486	7.9177	0.44006	0.000497848	4.21052e-05	8.58872	0.46184	0.03828	0.03868	0.0101	7.02448e-06									Mean943	23.7941	0.22115	0.000297311	7.25621e-06	23.7722	0.23972	0.45061	0.45484
																						Mean487	25.4759	0.24254	0.000262176	6.54544e-06	25.0993	0.26882	0.71011	0.71753	0.01011	7.02903e-06									Mean946	41.8201	0.37962	0.000232898	5.81654e-06	41.8874	0.51569	0.27027	0.2728
																						Mean489	14.585	0.5393	0.00106	5.53287e-05	15.9297	0.54665	0.11622	0.11744	0.01016	7.06751e-06									Mean948	14.9939	0.26166	0.000442298	1.54808e-05	15.0101	0.27545	0.06317	0.06376
																						Mean490	23.3608	0.31662	0.000324675	9.04052e-06	23.3791	0.3521	0.68705	0.69424	0.01017	7.07379e-06									Mean955	623.603	43.847	0.000492206	1.17776e-05	624.136	44.0353	0.18913	0.1909
																						Mean491	276.507	29.7285	0.000382743	1.64525e-05	275.266	29.9803	0.43883	0.44342	0.01019	7.08523e-06									Mean957	36.3443	0.24498	0.000384071	5.64644e-06	36.2697	0.26132	0.60887	0.61457
																						Mean492	22.2273	0.70126	0.000444036	1.73854e-05	22.6242	0.74158	0.18641	0.18835	0.01021	7.09732e-06									Mean959	30.0308	0.23665	0.000355403	6.43895e-06	30.6069	0.25424	0.35552	0.35886
																						Mean493	31.9169	1.57087	0.000539667	2.22637e-05	32.5251	1.61177	0.11326	0.11444	0.01023	7.11281e-06									Mean962	13.8875	0.2375	0.000358357	1.40084e-05	14.2698	0.25498	0.05683	0.05736
																						Mean494	11.7403	0.50313	0.00044027	2.75236e-05	12.2099	0.53529	0.10107	0.10212	0.01026	7.13195e-06									Mean963	7.02414	0.33974	0.000766406	6.15655e-05	7.79392	0.34638	0.02149	0.02169
																						Mean495	15.493	0.41577	0.000464161	1.97217e-05	16.1049	0.43925	0.15486	0.15648	0.01028	7.14566e-06									Mean966	29.376	0.23773	0.000359129	6.63298e-06	29.6938	0.25517	0.18482	0.18656
																						Mean496	8.82294	0.35533	0.000536498	3.62197e-05	9.3916	0.36822	0.03407	0.03442	0.01031	7.17085e-06									Mean968	26.4471	0.21772	0.000279926	6.33108e-06	26.3653	0.23534	0.2296	0.23175
																						Mean497	15.5856	0.7579	0.00051081	2.89371e-05	16.082	0.7905	0.15887	0.16053	0.01034	7.19097e-06									Mean969	17.5569	0.22339	0.000306834	1.00084e-05	18.0898	0.24212	0.14959	0.15099
																						Mean498	21.9033	0.3545	0.000378133	1.11031e-05	22.3688	0.38423	0.20788	0.21005	0.01035	7.19869e-06									Mean970	16.0873	0.24202	0.000373893	1.24879e-05	16.8249	0.25881	0.09819	0.09911
																						Mean499	16.1684	0.59239	0.000516667	2.47749e-05	16.6349	0.61948	0.11504	0.11624	0.01038	7.21592e-06									Mean971	12.488	0.37704	0.00095819	4.64056e-05	13.0733	0.38218	0.11302	0.11408
																						Mean500	14.9895	0.45821	0.000818968	3.72901e-05	16.0647	0.46687	0.08611	0.08701	0.01041	7.24185e-06									Mean973	11.8331	0.31787	0.000665602	3.06452e-05	12.5055	0.3258	0.03558	0.03592
																						Mean501	38.8512	2.66401	0.000509322	2.40512e-05	39.2999	2.71763	0.14899	0.15055	0.01044	7.25858e-06									Mean975	10.8991	0.32204	0.000684181	3.44119e-05	11.436	0.32969	0.03068	0.03097
																						Mean502	12.9324	0.61551	0.000535549	3.26176e-05	13.5546	0.64166	0.07133	0.07207	0.01047	7.28126e-06									Mean979	101.126	5.67397	0.000776512	2.20868e-05	101.53	5.71122	0.03616	0.0365
																						Mean503	10.3467	0.44062	0.000498614	3.22839e-05	10.9786	0.46236	0.04979	0.05031	0.0105	7.30371e-06									Mean982	33.7895	0.89246	0.0013	3.75534e-05	34.9621	0.90365	0.06327	0.06387
																						Mean504	27.191	0.59139	0.000235879	1.02128e-05	26.2884	0.73743	0.63032	0.63691	0.01051	7.31082e-06									Mean983	28.1278	0.86882	0.000325452	1.36104e-05	28.2232	0.97799	0.06548	0.0661
																						Mean505	47.278	4.05442	0.00054717	2.75618e-05	47.973	4.10741	0.12877	0.13012	0.01054	7.32998e-06									Mean985	7.12392	0.2904	0.000550387	4.07836e-05	8.57625	0.30064	0.04198	0.04237
																						Mean506	30.8428	1.73221	0.000476515	2.20194e-05	31.2601	1.785	0.13524	0.13665	0.01056	7.34529e-06									Mean986	30.8831	3.0248	0.00137	8.78804e-05	31.5297	3.04158	0.02763	0.02788
																						Mean507	18.4784	0.35385	0.00037722	1.3129e-05	18.7863	0.38367	0.3001	0.30324	0.01058	7.35442e-06									Mean991	7.88097	0.28828	0.000542029	3.62488e-05	8.44961	0.29874	0.02637	0.02661
																						Mean508	17.103	0.30244	0.000404633	1.36627e-05	17.4862	0.32055	0.33124	0.3347	0.01059	7.36393e-06									Mean993	36.6569	0.55563	0.000816874	1.6165e-05	37.8866	0.56985	0.15	0.15141
																						Mean510	24.2046	0.76957	0.000517066	1.89841e-05	24.7836	0.80177	0.29611	0.29921	0.01061	7.37713e-06									Mean1000	6.91572	0.46519	0.00152	0.000158607	8.87418	0.4684	0.0438	0.04421
																						Mean512	29.894	0.35819	0.000543927	1.08704e-05	31.4954	0.37088	0.16761	0.16937	0.01062	7.38469e-06									Mean1001	7.75298	0.35971	0.000865849	6.53374e-05	8.61689	0.36546	0.04846	0.04892
																						Mean513	23.1455	0.36412	0.000391692	1.08946e-05	23.345	0.39264	0.625	0.63153	0.01063	7.39226e-06									Mean1002	51.1932	0.90299	0.000424705	8.52414e-06	51.9363	0.96479	0.09755	0.09846
																						Mean514	16.6692	0.54459	0.000476455	2.14828e-05	17.1479	0.57407	0.14027	0.14173	0.01065	7.4072e-06									Mean1003	9.39499	0.40132	0.0011	7.41017e-05	10.398	0.40576	0.04038	0.04076
																						Mean515	20.7296	0.31775	0.000326273	1.02303e-05	20.7288	0.35304	0.53997	0.54561	0.01066	7.41432e-06									Mean1004	15.6389	0.2636	0.000449225	1.50617e-05	16.4126	0.27711	0.09261	0.09348
																						Mean516	23.3486	0.36105	0.00038737	1.06759e-05	23.5817	0.38995	0.54592	0.55163	0.01067	7.42174e-06									Mean1006	15.6889	0.56782	0.00143	7.1488e-05	16.4494	0.57394	0.02653	0.02678
																						Mean517	7.52901	0.30228	0.000404259	3.10079e-05	9.89096	0.32041	0.17857	0.18044	0.0107	7.4433e-06									Mean1009	19.1942	0.5809	0.000295118	1.57094e-05	19.8576	0.68995	0.06527	0.06588
																						Mean521	6.58612	0.29618	0.000295578	2.97821e-05	9.03667	0.33531	0.12118	0.12245	0.01073	7.46401e-06									Mean1010	11.7027	0.22945	0.000329955	1.56985e-05	11.8779	0.24791	0.06466	0.06527
																						Mean522	38.2036	0.35939	0.00054706	8.56593e-06	40.0416	0.372	0.28971	0.29274	0.01074	7.46997e-06									Mean1015	271.038	243.416	0.00256	0.00050672	271.421	243.431	0.00899	0.00908
																						Mean524	16.4943	0.47159	0.000857455	3.61644e-05	18.5618	0.47997	0.22489	0.22724	0.01078	7.49512e-06									Mean1017	15.702	0.24216	0.000374386	1.28075e-05	15.8963	0.25894	0.07763	0.07836
																						Mean525	6.76368	0.34353	0.000362664	3.45047e-05	9.16545	0.37477	0.13575	0.13717	0.01081	7.51912e-06									Mean1018	35.2798	0.29028	0.000359144	6.21085e-06	36.3449	0.32293	0.25873	0.26116
																						Mean526	18.2693	0.4879	0.000904751	3.52571e-05	20.75	0.49598	0.25758	0.26027	0.01085	7.54363e-06									Mean1019	6.78092	0.32697	0.000706548	5.75574e-05	8.27783	0.33432	0.03848	0.03884
																						Mean528	11.5549	0.44338	0.000502422	2.9191e-05	12.2278	0.46495	0.07707	0.07788	0.01088	7.56393e-06									Mean1020	2542.68	439.096	0.00222	7.58738e-05	2543.37	439.114	0.05946	0.06002
																						Mean529	36.8637	2.22615	0.000557415	2.44672e-05	37.5989	2.2695	0.15737	0.15901	0.0109	7.58095e-06									Mean1021	37.9581	0.97496	0.000536357	1.41087e-05	39.2618	1.01555	0.13148	0.13272
																						Mean530	20.781	0.58147	0.00118	4.59198e-05	22.7389	0.58838	0.175	0.17683	0.01095	7.61288e-06									Mean1024	46.9325	0.9517	0.000499541	1.06574e-05	46.9738	0.99753	0.11527	0.11635
																						Mean531	20.4217	0.42756	0.000732092	2.34224e-05	21.9784	0.43704	0.11095	0.1121	0.01097	7.62917e-06									Mean1027	6.94128	0.37901	0.000969024	8.4756e-05	7.43393	0.38408	0.02	0.02018
																						Mean532	43.0874	2.60585	0.00056163	2.32437e-05	43.8099	2.65067	0.13374	0.13513	0.01099	7.64533e-06									Mean1028	5.90471	0.3768	0.000956847	9.796e-05	6.54975	0.38194	0.01904	0.01922
																						Mean533	17.2554	0.35882	0.000384227	1.4325e-05	17.533	0.388	0.36044	0.3642	0.01101	7.6553e-06									Mean1029	23.7792	0.24336	0.000378508	8.53015e-06	24.8145	0.25995	0.26077	0.26321
																						Mean534	14.0914	0.3252	0.000336797	1.54682e-05	14.856	0.35924	0.0771	0.07791	0.01102	7.66605e-06									Mean1030	18.8868	0.21527	0.000254393	8.51064e-06	18.7792	0.22889	0.2635	0.26597
																						Mean535	9.771	0.51517	0.000599419	4.38322e-05	10.3752	0.53343	0.04699	0.04748	0.01107	7.69653e-06									Mean1032	697.008	49.8329	0.0014	2.89592e-05	698.219	49.8571	0.05684	0.05737
																						Mean538	71.1237	5.85968	0.000561156	2.40195e-05	71.7467	5.91539	0.1473	0.14884	0.01109	7.71324e-06									Mean1035	57118	187669	0.00184	0.000581282	57118.9	187669	0.01065	0.01075
																						Mean539	21.5732	0.43569	0.000754929	2.31286e-05	23.8619	0.44492	0.28174	0.28468	0.01111	7.72932e-06									Mean1037	11.8061	0.29317	0.000561468	2.51622e-05	13.3148	0.30313	0.04485	0.04527
																						Mean541	53.8678	0.47149	0.000857168	1.10682e-05	56.8123	0.47987	0.53537	0.54096	0.01113	7.73702e-06									Mean1038	-625.029	688.868	-4.15823e-06	4.45006e-06	30.6978	0.27261	9.2219	9.30835
																						Mean542	95.2322	7.92021	0.0004171	1.79343e-05	95.1874	8.03631	0.27959	0.28251	0.01114	7.74949e-06									Mean1043	44.5094	0.38904	0.000144828	5.76612e-06	39.8861	0.52284	0.29501	0.29777
																						Mean543	17.6973	0.37409	0.000405742	1.47931e-05	18.063	0.40146	0.36854	0.37239	0.01116	7.75978e-06									Mean1048	15.1796	0.30119	0.000594188	2.0875e-05	15.5299	0.31041	0.06581	0.06643
																						Mean544	10.4013	0.29419	0.000452248	2.40394e-05	11.0287	0.30618	0.04881	0.04932	0.01118	7.77649e-06									Mean1054	21.3267	0.91148	0.0027	0.000143191	22.6866	0.9164	0.03389	0.03421
																						Mean545	33.0938	0.36741	0.00039633	7.71454e-06	34.779	0.39554	0.16523	0.16696	0.01119	7.78186e-06									Mean1055	14.1092	0.28993	0.000548547	2.0516e-05	14.3625	0.30022	0.06461	0.06522
																						Mean547	8.20166	0.39527	0.000435505	3.4549e-05	10.5239	0.42049	0.12355	0.12484	0.01122	7.80588e-06									Mean1056	13.5896	0.24348	0.000378933	1.49394e-05	14.4167	0.26006	0.08375	0.08453
																						Mean549	8.98747	0.32103	0.000449697	2.90184e-05	11.4513	0.33692	0.1322	0.13358	0.01125	7.82606e-06									Mean1074	33.9293	0.6168	0.000345634	9.50117e-06	35.5073	0.6954	0.1032	0.10417
																						Mean550	13.2827	0.41239	0.000459452	2.27218e-05	13.8333	0.43613	0.11771	0.11894	0.01128	7.84187e-06									Mean1085	82.7754	10.2128	0.000861554	4.50884e-05	83.9198	10.2486	0.19438	0.19621
																						Mean551	35.3525	0.44598	0.000784079	1.48754e-05	36.308	0.45494	0.17909	0.18096	0.01129	7.85221e-06									Mean1087	40.075	0.21907	0.000227955	3.87234e-06	38.7159	0.2222	0.56389	0.56917
																						Mean552	16.4874	0.28734	0.00036904	1.29845e-05	16.7903	0.30758	0.38275	0.38675	0.0113	7.86124e-06									Mean1094	14.6377	0.25431	0.000416355	1.50084e-05	16.4235	0.2692	0.09159	0.09244
																						Mean553	13.1092	0.47546	0.00086863	4.63501e-05	14.2018	0.48376	0.09442	0.0954	0.01135	7.89347e-06									Mean1098	10.0352	0.29832	0.000582363	3.08541e-05	10.9573	0.3078	0.03483	0.03516
																						Mean554	9.59925	0.33352	0.000480761	2.92621e-05	10.2841	0.34817	0.05103	0.05157	0.01138	7.91382e-06									Mean1099	54.7436	0.36488	0.000149113	4.0135e-06	50.201	0.40498	0.3023	0.30513
																						Mean555	36.9199	0.33875	0.000493974	7.8485e-06	38.1953	0.35294	0.28278	0.28574	0.01139	7.91928e-06									Mean1103	131.373	11.7059	0.000434269	1.85263e-05	132.245	11.8641	0.05258	0.05307
																						Mean556	24.6935	0.33182	0.000476507	1.12612e-05	27.0232	0.34663	0.22739	0.22977	0.0114	7.92711e-06									Mean1115	9.56079	0.40956	0.00115	7.73921e-05	10.1433	0.41381	0.01925	0.01943
																						Mean558	18.1642	0.40217	0.000445172	1.60034e-05	18.4989	0.42677	0.24995	0.25256	0.01142	7.93824e-06									Mean1126	9.70283	0.26831	0.000466288	2.51674e-05	10.2869	0.28117	0.05114	0.05162
																						Mean560	13.2192	0.43675	0.000493286	2.49258e-05	13.6767	0.45875	0.10258	0.10365	0.01144	7.95557e-06									Mean1128	7.31234	0.31236	0.000641503	4.74293e-05	8.09529	0.32068	0.02623	0.02648
																						Mean561	24.4127	0.86552	0.00203	9.06369e-05	26.4493	0.87118	0.20361	0.20574	0.01153	8.0186e-06									Mean1133	11.1889	0.30346	0.000603629	2.88436e-05	11.8828	0.31248	0.06497	0.06558
																						Mean562	13.8539	0.28851	0.000371771	1.55569e-05	14.1336	0.30858	0.38478	0.3888	0.01155	8.02942e-06									Mean1134	17.4914	0.24612	0.000388006	1.18297e-05	17.541	0.26228	0.13904	0.14035
																						Mean563	12.9563	0.35148	0.000526526	2.41126e-05	14.2215	0.36465	0.10495	0.10604	0.01157	8.04619e-06									Mean1138	88.1411	0.72908	0.000382643	4.16843e-06	86.6842	0.79824	1.96216	1.98056
																						Mean565	15.9369	0.35848	0.000383745	1.54902e-05	16.2473	0.3877	0.27461	0.27748	0.01159	8.05696e-06									Mean1139	33.3783	0.23546	0.000201859	4.53503e-06	31.8442	0.21559	0.28701	0.2897
																						Mean566	8.51582	0.29497	0.000386925	2.62703e-05	8.91228	0.3141	0.11751	0.11874	0.01161	8.07523e-06									Mean1142	744.726	426.865	0.0013	0.00014377	745.857	426.898	0.01776	0.01793
																						Mean568	149.303	3.87931	0.000465516	7.46077e-06	150.402	3.95096	0.53496	0.54055	0.01162	8.08042e-06									Mean1144	40.9744	0.35102	0.000187236	6.16968e-06	38.4316	0.55283	0.2447	0.247
																						Mean569	38.6367	2.67832	0.000582195	2.72373e-05	39.4112	2.72085	0.09638	0.09739	0.01165	8.09936e-06									Mean1146	48.2846	0.65909	0.000363587	7.04801e-06	47.913	0.73214	0.21216	0.21415
																						Mean570	18.7048	0.6511	0.00045064	2.00918e-05	19.1307	0.68851	0.21398	0.21621	0.01167	8.11333e-06									Mean1148	9.30437	0.29326	0.000561824	3.19506e-05	9.64952	0.30321	0.03502	0.03534
																						Mean571	52.5963	0.41087	0.000457328	5.70632e-06	55.0196	0.43473	0.67555	0.68261	0.01167	8.1173e-06									Mean1149	33.7819	0.69016	0.000596014	1.43845e-05	35.9374	0.71834	0.10252	0.10348
																						Mean572	42.9582	3.59012	0.000596085	3.01968e-05	43.7465	3.63435	0.09689	0.09791	0.0117	8.1383e-06									Mean1150	32.2211	0.32763	0.000177835	7.55531e-06	30.5086	0.51311	0.15674	0.15821
																						Mean573	18.9352	0.38595	0.000422424	1.44542e-05	19.3246	0.41206	0.32963	0.33308	0.01172	8.14835e-06									Mean1152	68.852	0.73677	0.000285604	4.97815e-06	68.5352	0.87295	0.46407	0.46842
																						Mean574	25.1527	0.43659	0.000757483	1.99299e-05	27.6225	0.4458	0.29283	0.29589	0.01174	8.16221e-06									Mean1156	13.371	0.36378	0.000887035	3.91116e-05	13.6684	0.36937	0.04091	0.04129
																						Mean575	17.2517	0.40237	0.000445446	1.68621e-05	17.7894	0.42695	0.30476	0.30794	0.01175	8.17394e-06									Mean1158	42.1366	7.20268	0.00152	0.000126759	44.6625	7.22053	0.46444	0.46879
																						Mean576	24.5422	0.48557	0.000346252	1.1109e-05	24.6654	0.53742	0.50866	0.51398	0.01177	8.18166e-06									Mean1161	16.4942	0.28457	0.000527496	1.68148e-05	16.7985	0.29543	0.08213	0.0829
																						Mean577	13.8906	0.37876	0.000598254	2.63501e-05	14.6311	0.39021	0.09077	0.09172	0.01179	8.19998e-06									Mean1162	8.16528	0.39177	0.00104	7.9382e-05	8.63063	0.39646	0.03225	0.03255
																						Mean578	123.005	8.76502	0.00048957	1.65701e-05	123.535	8.84728	0.2737	0.27656	0.01181	8.21151e-06									Mean1163	10.3093	0.35057	0.000819461	4.57237e-05	10.7579	0.3567	0.02494	0.02517
																						Mean579	14.3616	0.3333	0.000480218	1.95337e-05	14.9908	0.34797	0.16414	0.16585	0.01183	8.22509e-06									Mean1167	19.8074	0.36529	0.000894938	2.67138e-05	20.4892	0.37082	0.0414	0.04178
																						Mean580	15.8679	0.43474	0.000490503	2.06171e-05	16.3887	0.45687	0.15488	0.15649	0.01185	8.23943e-06									Mean1169	29.7525	0.21595	0.000241984	5.3085e-06	28.9578	0.22575	0.23106	0.23323
																						Mean582	14.3768	0.30248	0.000404723	1.62572e-05	14.6852	0.32058	0.26307	0.26582	0.01186	8.25073e-06									Mean1170	12.5127	0.27697	0.000498423	2.08748e-05	13.9819	0.28871	0.12306	0.12421
																						Mean584	19.0005	1.29419	0.000524411	3.25983e-05	19.6748	1.3342	0.07388	0.07465	0.0119	8.2734e-06									Mean1171	57.3484	0.23994	0.000204206	2.88375e-06	55.7062	0.25575	1.05415	1.06403
																						Mean586	16.9115	0.37823	0.000411559	1.57225e-05	19.0791	0.40514	0.15304	0.15464	0.01191	8.28434e-06									Mean1175	27.5889	0.22104	0.000296806	6.25238e-06	28.6291	0.2396	0.18798	0.18975
																						Mean587	23.4668	0.34454	0.00050871	1.27789e-05	25.7465	0.35825	0.20585	0.20801	0.01193	8.29322e-06									Mean1176	3249.63	429.016	0.000911757	2.35156e-05	3253.08	429.08	0.19518	0.19701
																						Mean588	35.8431	1.37338	0.00052792	1.79839e-05	36.4653	1.41384	0.25282	0.25546	0.01194	8.30573e-06									Mean1179	27.0865	0.23208	0.000339395	6.911e-06	27.372	0.25026	0.3412	0.3444
																						Mean589	18.6772	0.4133	0.000460718	1.62128e-05	19.1218	0.43697	0.26774	0.27054	0.01196	8.317e-06									Mean1180	9.47185	0.31472	0.000651744	3.73203e-05	9.77442	0.32287	0.02823	0.02849
																						Mean590	19.8376	0.39203	0.000430955	1.41128e-05	20.3355	0.41754	0.28248	0.28543	0.01197	8.32682e-06									Mean1184	65.5806	3.27579	0.000362111	1.37637e-05	66.5663	3.42765	0.08892	0.08976
																						Mean591	52.8205	1.00293	0.000761912	1.46496e-05	54.5387	1.02339	0.35184	0.35552	0.01199	8.33701e-06									Mean1186	111.269	2.08179	0.000259909	5.79414e-06	108.426	2.37413	0.45107	0.4553
																						Mean592	21.224	0.35551	0.000379559	1.15022e-05	21.5071	0.38511	0.47099	0.47591	0.012	8.34501e-06									Mean1197	49.9452	0.37743	0.000236272	4.83729e-06	48.7215	0.508	0.27057	0.27311
																						Mean593	18.068	0.41841	0.000467843	1.70743e-05	18.5676	0.44169	0.25169	0.25432	0.01202	8.35688e-06									Mean1201	9.04569	0.22367	0.000307974	1.94671e-05	9.57301	0.2424	0.04204	0.04244
																						Mean594	16.072	0.40899	0.000454703	1.85459e-05	16.5334	0.43301	0.20375	0.20589	0.01204	8.36978e-06									Mean1202	6.32301	0.46113	0.00149	0.000168734	7.71528	0.4644	0.03155	0.03185
																						Mean595	24.331	0.34112	0.000499973	1.20774e-05	25.59	0.3551	0.32366	0.32704	0.01205	8.37817e-06									Mean1203	13.3528	0.25383	0.00041467	1.6394e-05	14.4836	0.26879	0.08602	0.08683
																						Mean596	35.9885	2.59911	0.000536529	2.66986e-05	36.5851	2.64758	0.10434	0.10543	0.01207	8.39674e-06									Mean1204	21.7014	0.35763	0.000478733	1.33519e-05	22.9121	0.38105	0.06818	0.06882
																						Mean597	19.0503	0.31277	0.000319225	1.09312e-05	19.1945	0.34892	0.44326	0.44789	0.01209	8.40434e-06									Mean1205	46.2487	0.38065	0.000217263	5.38353e-06	45.5522	0.5421	0.14647	0.14785
																						Mean598	12.788	0.57016	0.000670836	3.94602e-05	13.6961	0.58684	0.06485	0.06552	0.01212	8.43178e-06									Mean1210	22.7169	0.31202	0.000193731	9.99634e-06	21.767	0.46036	0.13345	0.13471
																						Mean600	69.2616	9.07372	0.000626249	3.69131e-05	69.8822	9.1244	0.07852	0.07934	0.01216	8.45745e-06									Mean1212	16.5678	0.21992	0.000291613	1.03146e-05	16.5459	0.23829	0.1321	0.13334
																						Mean602	40.7731	2.91624	0.000471971	2.2879e-05	41.2857	2.98001	0.18674	0.1887	0.01218	8.47336e-06									Mean1213	9.43452	0.33148	0.000727356	4.2898e-05	9.86847	0.33856	0.02718	0.02743
																						Mean603	10.0546	0.41951	0.000709594	4.55918e-05	11.9366	0.42925	0.20316	0.20529	0.01223	8.50507e-06									Mean1215	26.0041	0.35329	0.00047102	1.09432e-05	28.6737	0.37715	0.216	0.21802
																						Mean605	71.359	7.87449	0.000625709	3.23794e-05	72.2708	7.92365	0.10936	0.11051	0.01226	8.52759e-06									Mean1218	27.9256	0.36505	0.000491905	1.07002e-05	31.2881	0.38775	0.35751	0.36086
																						Mean607	22.7086	0.38239	0.000417418	1.1893e-05	23.2694	0.40887	0.37866	0.38262	0.01227	8.53586e-06									Mean1225	25.1879	0.23129	0.000206397	6.03061e-06	23.8095	0.21674	0.19302	0.19483
																						Mean608	16.9115	0.53991	0.00106	4.78379e-05	18.9633	0.54725	0.21397	0.21621	0.01232	8.56912e-06									Mean1227	7.54437	0.37726	0.000959386	7.69424e-05	8.14245	0.38239	0.01684	0.017
																						Mean609	13.4909	0.46227	0.000528327	2.66953e-05	14.0904	0.48278	0.09241	0.09338	0.01235	8.58769e-06									Mean1228	19.0339	0.26902	0.000468911	1.29006e-05	20.0335	0.28179	0.07749	0.07821
																						Mean610	8.81536	0.30593	0.000412979	2.7056e-05	11.0404	0.32358	0.15763	0.15928	0.01238	8.6065e-06									Mean1229	44.3038	0.61153	0.000306428	7.03209e-06	43.7248	0.71466	0.47576	0.48022
																						Mean611	19.0427	0.30626	0.000413782	1.25496e-05	19.3969	0.32388	0.34074	0.34431	0.01239	8.61523e-06									Mean1232	23.0647	0.3025	0.000165437	6.49245e-06	21.5301	0.2064	0.22204	0.22412
																						Mean612	9.79571	0.34322	0.000505336	3.03749e-05	10.6121	0.35703	0.05603	0.05661	0.01242	8.63635e-06									Mean1240	34.8734	0.2455	0.000385853	5.90664e-06	35.9726	0.26176	0.35132	0.35462
																						Mean614	19.3679	0.48092	0.000553642	1.98008e-05	20.0123	0.50053	0.13102	0.13239	0.01244	8.65012e-06									Mean1243	12.8513	0.27904	0.000506275	2.06589e-05	15.0485	0.29053	0.08924	0.09007
																						Mean616	21.7147	0.52533	0.00101	3.50381e-05	23.7999	0.53285	0.24076	0.24327	0.01247	8.67449e-06									Mean1244	7.24193	0.722	0.002	0.00026168	8.45137	0.72735	0.0229	0.02311
																						Mean617	26.5093	0.49338	0.00092072	2.49184e-05	29.178	0.50136	0.3996	0.40378	0.0125	8.69182e-06									Mean1245	7.98636	0.29176	0.000555828	3.67794e-05	8.46355	0.30186	0.03855	0.03891
																						Mean618	26.1468	0.44944	0.000391718	1.07494e-05	26.4361	0.48635	0.59346	0.59966	0.01251	8.69929e-06									Mean1248	25.2419	0.24116	0.000370954	7.91033e-06	25.3441	0.25809	0.16415	0.16569
																						Mean619	15.3096	0.35136	0.000526231	2.03925e-05	17.2596	0.36454	0.15012	0.15169	0.01253	8.71347e-06									Mean1263	19.3475	0.2681	0.000465515	1.2601e-05	19.8985	0.28098	0.06957	0.07022
																						Mean620	16.573	0.44179	0.000500232	2.02387e-05	17.2657	0.46346	0.15472	0.15634	0.01255	8.72755e-06									Mean1264	23.3116	0.29351	0.00056281	1.27776e-05	23.4055	0.30343	0.48941	0.49399
																						Mean621	22.1163	0.45436	0.000517508	1.58468e-05	22.8308	0.4753	0.15877	0.16043	0.01257	8.73857e-06									Mean1265	36.0076	0.21586	0.0002428	4.39117e-06	34.7926	0.22596	1.01422	1.02373
																						Mean622	8.05654	1.0184	0.000637652	8.06694e-05	8.71284	1.0449	0.02467	0.02493	0.01265	8.79467e-06									Mean1268	10.253	0.35944	0.000864453	4.93013e-05	11.1712	0.3652	0.05433	0.05484
																						Mean625	109.669	10.311	0.000511564	2.16006e-05	110.257	10.3893	0.17056	0.17235	0.01267	8.80969e-06									Mean1270	1624.39	482.024	0.000959127	5.43972e-05	1625.93	482.082	0.02938	0.02965
																						Mean627	44.1512	2.53152	0.000424013	1.78977e-05	44.6243	2.60727	0.26715	0.26994	0.01269	8.82213e-06									Mean1275	14.3583	0.26498	0.000454212	1.6579e-05	15.7332	0.2783	0.0615	0.06208
																						Mean628	9.71999	0.36548	0.000563019	3.48837e-05	11.7697	0.3777	0.1604	0.16208	0.01272	8.84639e-06									Mean1278	13.4483	0.27558	0.000493197	1.92123e-05	14.5561	0.28749	0.15014	0.15155
																						Mean629	32.909	2.20366	0.000528937	2.60219e-05	33.5813	2.25094	0.11737	0.1186	0.01275	8.86449e-06									Mean1281	9.99109	0.25424	0.000416118	2.19774e-05	10.6759	0.26914	0.05714	0.05767
																						Mean630	8.75587	0.41166	0.000687793	5.0194e-05	10.7724	0.42166	0.20544	0.20759	0.0128	8.89939e-06									Mean1283	23.1436	0.22014	0.000292654	7.3977e-06	26.2303	0.23855	0.21076	0.21274
																						Mean631	23.1016	0.42582	0.000727202	2.05165e-05	24.1785	0.43535	0.17368	0.17549	0.01282	8.91366e-06									Mean1291	30.1724	1.22508	0.000200358	1.6847e-05	28.7709	1.67824	0.14297	0.14431
																						Mean632	18.0268	0.38364	0.000419169	1.50518e-05	18.3665	0.40998	0.3135	0.31678	0.01283	8.92413e-06									Mean1292	31.9704	0.23158	0.000337639	5.83472e-06	32.7993	0.24983	0.23168	0.23385
																						Mean634	133.799	3.20777	0.0003271	6.05811e-06	132.798	3.358	1.27622	1.28956	--	--									Mean1295	14.9572	0.3015	0.000595474	2.12385e-05	15.3039	0.31069	0.03927	0.03964
																						Mean635	14.0828	0.38131	0.000605097	2.63717e-05	16.5622	0.39264	0.17621	0.17805	0.01286	8.94247e-06									Mean1298	9.06444	0.34321	0.000783143	4.90458e-05	9.28052	0.34967	0.03273	0.03304
																						Mean636	6.50881	0.42016	0.000470268	4.76975e-05	8.19993	0.4433	0.09639	0.0974	0.01291	8.97564e-06									Mean1300	9.70186	0.32558	0.00070018	3.97785e-05	11.5835	0.333	0.04354	0.04395
																						Mean637	6.31444	0.42445	0.000723368	7.45203e-05	7.81799	0.43402	0.11559	0.1168	0.01298	9.02746e-06									Mean1301	9.01354	0.28837	0.000542382	3.17167e-05	10.1497	0.29882	0.03691	0.03726
																						Mean639	7.92611	0.30805	0.000418068	3.04689e-05	10.3089	0.32544	0.11751	0.11874	0.01301	9.04865e-06									Mean1303	17.1977	0.30709	0.000618928	1.9325e-05	18.849	0.31582	0.08958	0.09042
																						Mean641	21.1897	0.42776	0.00073263	2.25963e-05	23.5661	0.43723	0.21227	0.21449	0.01303	9.06436e-06									Mean1307	38.9636	0.26356	0.000310839	5.05776e-06	39.0644	0.30094	0.24994	0.25228
																						Mean642	19.9891	0.37921	0.000412944	1.3351e-05	20.4724	0.40602	0.2859	0.28889	0.01305	9.07364e-06									Mean1308	13.1683	0.2833	0.000522584	2.08509e-05	13.7195	0.2943	0.06562	0.06624
																						Mean643	17.4994	0.42325	0.000474572	1.79405e-05	18.1951	0.44617	0.18907	0.19104	0.01307	9.08612e-06									Mean1311	7.88233	0.35807	0.000857414	6.34441e-05	8.50728	0.36388	0.03202	0.03232
																						Mean644	29.0215	0.3912	0.000631745	1.35309e-05	31.5226	0.40204	0.25574	0.25841	0.01308	9.09553e-06									Mean1313	21.6066	0.23111	0.000335956	8.60443e-06	22.5617	0.24941	0.13154	0.13278
																						Mean645	26.7968	0.32489	0.000336357	8.12477e-06	26.6672	0.35899	0.99675	1.00717	0.01309	9.10118e-06									Mean1316	8.37193	0.28053	0.000511952	3.20868e-05	8.67997	0.29185	0.03173	0.03202
																						Mean647	24.5238	0.95438	0.000503683	2.05734e-05	25.0681	0.99207	0.1751	0.17693	0.01311	9.11549e-06									Mean1320	17.6698	0.22492	0.000312959	1.00601e-05	18.1572	0.24365	0.20903	0.21099
																						Mean648	6.01056	0.34939	0.000521151	5.13422e-05	8.19071	0.36272	0.12392	0.12522	0.01316	9.15119e-06									Mean1323	2138.47	199.234	0.000937331	1.92466e-05	2141.56	199.286	0.08853	0.08936
																						Mean651	27.9677	0.43663	0.000757602	1.79278e-05	29.9196	0.44584	0.18724	0.1892	0.01318	9.16366e-06									Mean1327	29.954	3.33164	0.000848977	5.72574e-05	31.8089	3.3609	0.04702	0.04746
																						Mean652	18.3429	0.31452	0.000433754	1.36795e-05	19.0233	0.33114	0.2429	0.24544	0.01319	9.17317e-06									Mean1328	18.5666	0.25994	0.000436184	1.23408e-05	18.9476	0.27398	0.09992	0.10086
																						Mean653	46.6312	1.40233	0.000442952	1.21621e-05	47.0081	1.45846	0.44906	0.45375	0.0132	9.18163e-06									Mean1339	32.8849	0.54373	0.00032883	9.02754e-06	33.063	0.62481	0.27878	0.28139
																						Mean654	22.5999	0.36078	0.000308159	9.81881e-06	22.4725	0.41024	0.77563	0.78374	0.01321	9.18846e-06									Mean1340	11.4994	0.30282	0.000600966	2.79207e-05	11.9674	0.3119	0.03922	0.03959
																						Mean655	17.8153	0.26506	0.000317536	1.06045e-05	17.7753	0.28884	0.49705	0.50225	0.01322	9.19583e-06									Mean1345	7.16957	0.34625	0.000798043	6.35312e-05	7.55631	0.35257	0.01757	0.01774
																						Mean656	11.9535	0.34616	0.000512853	2.53286e-05	14.5858	0.35974	0.27059	0.27342	0.01325	9.21344e-06									Mean1346	9.15392	0.37642	0.000954747	6.30031e-05	9.43354	0.38157	0.0158	0.01595
																						Mean657	18.1363	0.40545	0.000350697	1.37784e-05	18.4638	0.44771	0.15576	0.15739	0.01326	9.22303e-06									Mean1348	221.628	106.663	0.000147774	9.89342e-05	189.385	133.057	0.23435	0.23655
																						Mean658	24.4042	0.32335	0.000334179	8.87067e-06	24.3074	0.3577	0.77356	0.78164	0.01327	9.2292e-06									Mean1350	9.73509	0.27942	0.000507692	2.73519e-05	10.7057	0.29086	0.04219	0.04258
																						Mean659	42.4871	0.42738	0.000731566	1.12471e-05	45.6291	0.43686	0.46279	0.46762	0.01328	9.23702e-06									Mean1352	21.3885	0.21536	0.000249325	7.45997e-06	21.0206	0.22761	0.15199	0.15342
																						Mean660	14.256	0.43217	0.000486944	2.27388e-05	14.7377	0.45447	0.11724	0.11847	0.01331	9.25283e-06									Mean1357	9.47434	0.27749	0.000500392	2.76825e-05	9.8915	0.28917	0.04097	0.04136
																						Mean661	13.5628	0.42787	0.000480986	2.35361e-05	14.0652	0.45046	0.11884	0.12008	0.01333	9.2692e-06									Mean1359	1009.18	53.6699	0.000781029	1.18638e-05	1010.9	53.7283	0.22161	0.22369
																						Mean662	17.7611	0.36238	0.000389233	1.41045e-05	18.0589	0.39111	0.29238	0.29544	0.01334	9.27901e-06									Mean1360	7.43846	0.32207	0.000684312	5.04332e-05	7.83506	0.32972	0.01883	0.01901
																						Mean663	13.5302	0.51395	0.000981	5.35291e-05	15.014	0.52161	0.10941	0.11055	0.0134	9.31623e-06									Mean1364	100.881	1.07943	0.000228859	4.37722e-06	94.4429	1.37323	1.64828	1.66374
																						Mean665	22.4583	0.40473	0.00066868	1.88453e-05	23.8876	0.41499	0.12253	0.12381	0.01342	9.32934e-06									Mean1366	11.8366	0.22715	0.000211799	1.28925e-05	11.8029	0.21811	0.09059	0.09144
																						Mean666	20.0682	0.41308	0.000691726	2.20685e-05	22.4286	0.42303	0.16434	0.16606	0.01344	9.34468e-06									Mean1377	29.6009	0.32121	0.000205026	7.70007e-06	28.2874	0.46464	0.2051	0.20702
																						Mean667	8.76203	0.34656	0.000513869	3.46352e-05	11.7909	0.3601	0.29535	0.29844	0.01347	9.36877e-06									Mean1378	12.2898	0.32282	0.000687683	3.07102e-05	15.9798	0.33042	0.14715	0.14853
																						Mean668	23.3798	0.38108	0.000415571	1.14949e-05	23.8561	0.40769	0.44984	0.45454	0.01348	9.37676e-06									Mean1384	9.39113	0.2969	0.000576557	3.25952e-05	9.77884	0.30651	0.02954	0.02981
																						Mean669	5.19857	0.27868	0.000348949	3.9202e-05	7.83818	0.30026	0.14765	0.14919	0.01352	9.40402e-06									Mean1385	365550	267419	0.00195	0.00013343	365551	267419	0.04375	0.04416
																						Mean670	46.5003	0.56507	0.000664333	1.06954e-05	48.066	0.58187	0.27769	0.2806	0.01353	9.41146e-06									Mean1386	24.6689	1.12266	0.000528634	2.32322e-05	25.5506	1.16694	0.07805	0.07878
																						Mean671	21.6357	0.46648	0.000407321	1.35875e-05	21.9194	0.5017	0.38816	0.39222	0.01355	9.42091e-06									Mean1387	7.83149	0.39954	0.00109	8.77265e-05	8.6736	0.40403	0.02722	0.02748
																						Mean672	7.53218	0.35785	0.000382849	3.26966e-05	10.0713	0.38715	0.1286	0.12995	0.01358	9.44365e-06									Mean1389	14.948	0.52991	0.000775108	3.66315e-05	15.5629	0.54467	0.04418	0.0446
																						Mean674	47.9737	2.22884	0.00047607	1.65056e-05	48.5194	2.2864	0.29735	0.30046	0.0136	9.45512e-06									Mean1390	25.5118	0.4812	0.000298386	1.06949e-05	25.8951	0.57418	0.14136	0.14268
																						Mean675	12.8442	0.34313	0.000505098	2.31529e-05	13.6003	0.35695	0.07755	0.07836	0.01362	9.47123e-06									Mean1391	34.4065	0.55083	0.000309542	8.5728e-06	34.5846	0.64491	0.20085	0.20273
																						Mean676	21.04	0.35385	0.000377212	1.15304e-05	21.3296	0.38367	0.46511	0.46997	0.01363	9.47924e-06									Mean1393	11.1719	0.23002	0.000332015	1.65113e-05	11.4152	0.24842	0.07953	0.08028
																						Mean677	5.64004	0.30271	0.000304932	3.56015e-05	7.72029	0.34066	0.11254	0.11372	0.01367	9.504e-06									Mean1397	21.2751	0.71594	0.000917252	3.59096e-05	23.0081	0.73081	0.15463	0.15608
																						Mean680	22.4588	0.52565	0.000460072	1.5223e-05	22.9712	0.55627	0.28046	0.28339	0.01368	9.51459e-06									Mean1400	40.8647	0.5016	0.000578427	9.81898e-06	41.2874	0.52505	0.15384	0.15528
																						Mean681	18.6041	0.39869	0.000440292	1.5425e-05	18.9807	0.42359	0.26451	0.26728	0.0137	9.52531e-06									Mean1406	7.52714	0.3263	0.000703481	5.15715e-05	8.62026	0.33368	0.02776	0.02802
																						Mean682	10.2323	0.60254	0.000524998	4.00538e-05	10.8419	0.6292	0.04638	0.04687	0.01374	9.55317e-06									Mean1408	12.6544	0.34005	0.000447483	2.12773e-05	13.5437	0.36538	0.04523	0.04565
																						Mean684	10.5273	0.40656	0.00067371	4.06068e-05	12.2534	0.41675	0.15529	0.15691	0.01378	9.58141e-06									Mean1415	15.1048	0.27788	0.000501843	1.7416e-05	16.4705	0.28951	0.10003	0.10097
																						Mean685	16.8142	0.49577	0.000927684	3.9716e-05	18.0874	0.50371	0.11899	0.12023	0.01382	9.60903e-06									Mean1419	29.0023	0.50113	0.00027598	9.56651e-06	29.4747	0.61661	0.16555	0.16711
																						Mean686	41.5193	1.8043	0.000465062	1.64543e-05	41.9936	1.86036	0.24712	0.2497	0.01383	9.62047e-06									Mean1421	14.0675	0.24817	0.00039504	1.49284e-05	14.8877	0.26401	0.07293	0.07362
																						Mean687	20.9921	0.36317	0.000390351	1.19692e-05	21.3216	0.3918	0.42623	0.43068	0.01385	9.62879e-06									Mean1423	31.1234	0.46648	0.000131199	4.95487e-06	25.282	0.19781	0.6745	0.68082
																						Mean688	15.2576	0.45763	0.00052198	2.32307e-05	15.8233	0.47838	0.18029	0.18217	0.01387	9.64495e-06									Mean1425	22.881	0.34903	0.000811772	2.0351e-05	23.4489	0.35523	0.19898	0.20084
																						Mean689	14.9035	0.49271	0.000918749	4.41861e-05	16.9131	0.5007	0.17595	0.17779	0.01391	9.67567e-06									Mean1427	26.2768	0.39761	0.000549522	1.29839e-05	27.196	0.41771	0.11166	0.1127
																						Mean690	48.1386	3.67656	0.00052457	2.44922e-05	48.7287	3.73231	0.17019	0.17197	0.01394	9.69271e-06									Mean1428	4819.63	2166.95	0.000629707	5.14856e-05	4818.89	2167.41	0.32423	0.32057
																						Mean692	24.0826	0.54611	0.00108	3.44622e-05	26.1793	0.55338	0.20377	0.2059	0.01397	9.71667e-06									Mean1430	8.57563	0.42825	0.00127	9.88135e-05	9.54741	0.4321	0.03174	0.03203
																						Mean693	20.3885	0.37573	0.00059017	1.7644e-05	21.8338	0.38735	0.11037	0.11152	0.01399	9.72894e-06									Mean1441	7.24828	0.32239	0.000685734	5.18889e-05	8.84931	0.33001	0.03763	0.03798
																						Mean696	9.95363	0.69439	0.000475689	4.07571e-05	10.5883	0.72959	0.04629	0.04677	0.01403	9.75728e-06									Mean1442	9.10999	0.37324	0.000937445	6.1778e-05	9.76703	0.3785	0.02019	0.02038
																						Mean697	29.5522	1.03933	0.00044214	1.61444e-05	29.9737	1.0891	0.30467	0.30786	0.01405	9.76851e-06									Mean1445	62.6179	4.56207	0.00146	6.03733e-05	63.7357	4.57923	0.0323	0.03261
																						Mean698	35.4156	0.48268	0.000249013	7.01534e-06	33.9404	0.59284	1.08368	1.09501	--	--									Mean1446	24.6946	0.26962	0.000178694	6.06375e-06	22.4294	0.20974	0.2512	0.25355
																						Mean699	39.8407	2.0538	0.000534846	2.07816e-05	40.4694	2.09917	0.16083	0.16251	0.01407	9.78296e-06									Mean1451	11.9061	0.29455	0.000567002	2.52277e-05	12.3742	0.30437	0.03554	0.03588
																						Mean700	9.88284	0.43459	0.000490298	3.30854e-05	10.2899	0.45673	0.06915	0.06988	0.0141	9.80597e-06									Mean1455	10.7314	0.26403	0.000450771	2.20213e-05	11.1604	0.27748	0.04306	0.04346
																						Mean702	143.671	10.5627	0.000325927	1.33138e-05	142.269	10.8165	0.52476	0.53025	0.01411	9.81523e-06									Mean1461	8.14383	0.33074	0.000723908	4.94011e-05	9.69118	0.33786	0.03713	0.03748
																						Mean703	8.89629	0.41695	0.000702459	5.08272e-05	10.9781	0.42677	0.1295	0.13085	0.01417	9.85058e-06									Mean1462	12.2918	0.30314	0.000602299	2.61883e-05	13.4495	0.31219	0.06059	0.06116
																						Mean704	14.0444	0.40061	0.000657399	2.94623e-05	15.9889	0.41105	0.26133	0.26407	0.01419	9.87106e-06									Mean1473	8.44584	0.35524	0.000842954	5.79066e-05	8.98488	0.36117	0.02412	0.02435
																						Mean705	17.2333	0.66372	0.00143	7.39349e-05	18.8088	0.67008	0.11015	0.1113	0.01427	9.92248e-06									Mean1482	22.6783	0.22896	0.000209303	6.71424e-06	21.9297	0.21748	0.45409	0.45835
																						Mean708	34.1743	2.53222	0.000507472	2.64008e-05	34.7035	2.58538	0.11021	0.11136	0.01429	9.94084e-06									Mean1486	21.5098	0.21917	0.000287935	7.89312e-06	21.4228	0.23736	0.10876	0.10978
																						Mean709	22.1075	0.75629	0.000509943	2.03475e-05	22.6767	0.78895	0.16476	0.16648	0.01432	9.95499e-06									Mean1487	30.1268	0.38842	0.00032931	8.2493e-06	29.4253	0.44944	0.48232	0.48684
																						Mean711	12.9469	0.63003	0.000547214	3.36281e-05	13.4965	0.65565	0.06409	0.06476	0.01435	9.97837e-06									Mean1488	62.2042	0.35515	0.000243317	3.72808e-06	60.8925	0.46847	0.46177	0.4661
																						Mean713	18.5855	0.34748	0.000516243	1.64181e-05	19.4635	0.36095	0.13543	0.13684	0.01437	9.98979e-06									Mean1489	25.5235	0.75741	0.000375009	1.45674e-05	26.3798	0.83119	0.14627	0.14764
																						Mean714	22.4937	0.33068	0.000344538	9.88928e-06	22.5677	0.36385	0.53063	0.53618	0.01438	9.99667e-06									Mean1494	13.446	0.26321	0.00044785	1.74671e-05	15.1954	0.27678	0.09328	0.09416
																						Mean716	15.2096	0.33122	0.000475008	1.82182e-05	15.8028	0.34609	0.22462	0.22697	0.01439	1.00093e-05									Mean1495	18364.8	5906.56	0.00101	4.50714e-05	18366	5906.65	0.19856	0.19533
																						Mean717	17.5265	0.43896	0.000496335	1.89477e-05	18.1559	0.46082	0.19928	0.20136	0.01441	1.00225e-05									Mean1504	22.8502	0.22862	0.000326932	7.99227e-06	24.9169	0.24715	0.15523	0.15668
																						Mean718	33.5666	0.42245	0.000717772	1.38709e-05	36.8072	0.43208	0.82811	0.83677	0.01443	1.00322e-05									Mean1505	50.4763	0.70819	0.000283398	6.64096e-06	50.4577	0.84384	0.20418	0.20609
																						Mean719	21.3384	0.46349	0.000404599	1.36693e-05	21.6862	0.499	0.38737	0.39142	0.01444	1.00417e-05									Mean1508	307.697	15.1587	0.00061633	1.19704e-05	308.059	15.2304	0.06115	0.06172
																						Mean720	37.2994	0.41	0.000456113	8.02095e-06	38.9095	0.43393	0.79124	0.79951	0.01445	1.00472e-05									Mean1513	7.86698	0.2729	0.000483199	3.21637e-05	8.3684	0.28515	0.03197	0.03227
																						Mean721	163.492	10.3411	0.000362178	1.19038e-05	163	10.5275	0.79268	0.80097	0.01446	1.00555e-05									Mean1516	18.6555	0.84705	0.00106	5.26725e-05	19.9169	0.86079	0.04115	0.04153
																						Mean722	16.5012	0.4314	0.000485874	1.95908e-05	17.0977	0.45374	0.24299	0.24552	0.01448	1.00691e-05									Mean1518	43.7865	0.32003	0.000411929	5.65558e-06	45.2315	0.34796	0.14984	0.15124
																						Mean724	17.6197	0.3921	0.000431053	1.58934e-05	18.0225	0.41761	0.25123	0.25386	0.0145	1.00802e-05									Mean1521	32.1465	0.33022	0.000430017	8.03821e-06	32.7682	0.35677	0.38348	0.38707
																						Mean726	25.7563	0.43935	0.000765281	1.97406e-05	28.7785	0.44848	0.4297	0.4342	0.01452	1.00939e-05									Mean1523	11.1709	0.3392	0.000763808	3.85443e-05	11.9117	0.34586	0.03593	0.03627
																						Mean727	16.0086	0.54577	0.000477461	2.24327e-05	16.5764	0.57517	0.15017	0.15174	0.01454	1.01095e-05									Mean1524	31.3671	2.36583	0.00050528	2.76619e-05	32.3399	2.42896	0.0455	0.04593
																						Mean728	55.1003	0.73672	0.000597214	9.30594e-06	56.5667	0.76133	0.52415	0.52962	0.01455	1.0116e-05									Mean1526	13.3982	0.30748	0.000620588	2.48839e-05	14.8877	0.31618	0.05018	0.05065
																						Mean730	21.1975	0.4442	0.000386883	1.3076e-05	21.6278	0.48167	0.3546	0.3583	0.01456	1.01251e-05									Mean1528	11.3857	0.27021	0.000473242	2.17639e-05	12.5852	0.28281	0.06049	0.06105
																						Mean731	1.55208e-07	907633000000000	-4.10269e-14	239919000	27.1396	0.11718	289.014	292.035	--	--									Mean1529	20.2986	0.67292	0.000998245	4.00105e-05	21.7463	0.68552	0.06172	0.0623
																						Mean732	44.0884	0.40043	0.000442739	6.55112e-06	44.9895	0.42518	0.41727	0.42163	0.01457	1.01296e-05									Mean1534	11.1234	0.34639	0.000798726	4.09943e-05	12.7749	0.35271	0.04911	0.04957
																						Mean733	67.3464	3.21291	0.000450371	1.42607e-05	67.9909	3.28521	0.37027	0.37414	0.01458	1.01396e-05									Mean1535	1080.58	158.722	0.00072911	2.53243e-05	1081.62	158.812	0.03026	0.03055
																						Mean734	15.9815	0.40406	0.000447815	1.83162e-05	17.1153	0.42849	0.30406	0.30724	0.0146	1.01523e-05									Mean1536	148618	1398100	0.00155	0.00121	148618	1398100	0.01145	0.01153
																						Mean735	20.8685	0.44227	0.000385102	1.32143e-05	21.1745	0.47995	0.3587	0.36245	0.01461	1.01615e-05									Mean1545	51.1191	0.28515	0.000350013	4.19882e-06	51.0191	0.3187	1.43443	1.44787
																						Mean736	19.3106	0.38779	0.000425006	1.42708e-05	19.6867	0.41372	0.27598	0.27886	0.01463	1.01714e-05									Mean1555	21.7022	0.47978	0.0011	3.52481e-05	22.4929	0.48683	0.07222	0.0729
																						Mean738	23.8163	0.3732	0.000583436	1.48867e-05	25.3362	0.38496	0.11172	0.11289	0.01464	1.01818e-05									Mean1557	12.1306	0.24451	0.000382479	1.68609e-05	13.683	0.26093	0.07677	0.07749
																						Mean739	21.3781	0.42513	0.000725282	2.20905e-05	23.5669	0.43468	0.19757	0.19964	0.01466	1.01971e-05									Mean1558	6.35078	0.32721	0.000707653	6.15755e-05	7.75858	0.33454	0.03014	0.03042
																						Mean740	34.5756	1.63381	0.000484143	1.92054e-05	35.0797	1.68402	0.19505	0.19709	0.01468	1.02105e-05									Mean1559	8.23398	0.34839	0.000808576	5.62641e-05	8.63352	0.35461	0.02805	0.02832
																						Mean741	19.3641	0.62477	0.000543005	2.22293e-05	19.9655	0.65058	0.21051	0.21271	0.0147	1.02259e-05									Mean1562	11.6031	0.23039	0.000333347	1.59398e-05	12.5288	0.24876	0.05708	0.05761
																						Mean742	20.5974	0.29086	0.000287904	9.34475e-06	20.5075	0.33097	0.28174	0.28469	0.01471	1.02324e-05									Mean1564	7.81154	0.35381	0.000835739	6.19095e-05	8.615	0.3598	0.02621	0.02645
																						Mean744	7.89185	0.35946	0.000547261	4.14854e-05	10.0405	0.37207	0.20443	0.20657	0.01476	1.02613e-05									Mean1565	7.3567	0.37372	0.00094006	7.67865e-05	8.41447	0.37896	0.02979	0.03007
																						Mean747	18.2876	0.44928	0.000793473	2.92384e-05	20.3893	0.45816	0.23088	0.23329	0.01478	1.02816e-05									Mean1566	19.8656	0.23305	0.000342839	9.4885e-06	21.5663	0.25112	0.16452	0.16606
																						Mean749	190.03	6.15448	0.000886571	1.44779e-05	191.359	6.18277	0.21263	0.21486	0.0148	1.02917e-05									Mean1568	13.1555	0.2839	0.000524891	2.09702e-05	14.1827	0.29483	0.06303	0.06363
																						Mean750	16.2273	0.59335	0.000700157	3.31672e-05	18.5044	0.60951	0.16265	0.16435	0.01483	1.03148e-05									Mean1570	8.33158	0.35167	0.000824929	5.70689e-05	8.79835	0.35775	0.02814	0.0284
																						Mean751	6.60231	0.31443	0.0005203	4.41789e-05	8.9382	0.3243	0.1315	0.13287	0.01488	1.03455e-05									Mean1572	67.6322	9.28567	6.71682e-05	2.64863e-05	38.8379	4.61735	0.7808	0.78812
																						Mean753	10.3569	0.4504	0.000796669	5.19181e-05	11.83	0.45925	0.11516	0.11636	0.01493	1.03816e-05									Mean1573	60.8572	0.72393	0.000390158	6.06925e-06	60.8746	0.78998	0.13148	0.13271
																						Mean754	16.6214	0.41733	0.000466328	1.8487e-05	18.2491	0.44068	0.23882	0.24131	0.01495	1.03944e-05									Mean1584	11.3647	0.27586	0.000494243	2.27844e-05	11.8242	0.28774	0.03773	0.03809
																						Mean755	19.9843	0.29673	0.00039108	1.13095e-05	20.2926	0.31561	0.44947	0.45417	0.01496	1.04023e-05									Mean1586	14.2697	0.25507	0.000419024	1.54829e-05	14.6065	0.26984	0.06027	0.06084
																						Mean756	14.5356	0.39512	0.000642401	2.76135e-05	17.991	0.40579	0.3437	0.34729	0.01499	1.04215e-05									Mean1591	107.34	4.78025	0.000469016	1.22906e-05	109.718	4.87385	0.14154	0.14287
																						Mean757	52.8454	1.8786	0.000475392	1.34728e-05	53.4814	1.93313	0.34981	0.35347	0.015	1.04309e-05									Mean1597	8.68409	0.37903	0.000969117	6.7755e-05	9.00408	0.3841	0.02081	0.02101
																						Mean758	13.091	0.48579	0.000560209	2.97702e-05	13.7634	0.50518	0.08708	0.08799	0.01503	1.04516e-05									Mean1600	8.59631	0.28119	0.000514449	3.14107e-05	9.44851	0.29243	0.05984	0.0604
																						Mean759	19.149	0.40858	0.00045413	1.55425e-05	19.762	0.43263	0.14452	0.14604	0.01504	1.04624e-05									Mean1604	8.5251	0.28362	0.000523807	3.22883e-05	10.4009	0.29458	0.09014	0.09098
																						Mean760	21.5216	0.38147	0.00060552	1.7272e-05	24.1188	0.39279	0.28446	0.28743	0.01506	1.04744e-05									Mean1613	10.0579	0.326	0.000702097	3.85007e-05	11.8696	0.3334	0.05259	0.05309
																						Mean761	12.9468	0.49741	0.000575796	3.12638e-05	14.2299	0.51632	0.07736	0.07817	0.01509	1.04961e-05									Mean1616	316.525	9.60763	0.00052957	7.42021e-06	315.743	9.69627	0.70578	0.7124
																						Mean762	13.9419	0.23386	0.000229768	1.12309e-05	14.7929	0.25722	0.17744	0.17929	0.0151	1.05039e-05									Mean1619	10.0813	0.28834	0.00054225	2.83498e-05	10.4145	0.29879	0.03362	0.03393
																						Mean763	17.2478	0.35347	0.000376671	1.40452e-05	17.4648	0.38333	0.33615	0.33966	0.01512	1.05137e-05									Mean1620	14.1644	0.37429	0.000943154	4.00566e-05	15.5678	0.37951	0.07042	0.07108
																						Mean764	19.2071	0.31667	0.000438991	1.32313e-05	19.8391	0.33304	0.4079	0.41217	0.01513	1.05229e-05									Mean1622	22.5409	0.72021	0.000470024	1.82416e-05	23.7587	0.76504	0.06749	0.06812
																						Mean765	7.52992	0.49956	0.000578667	5.41278e-05	8.19533	0.51838	0.02964	0.02995	0.01519	1.05606e-05									Mean1624	13.8742	0.25157	0.000406817	1.55176e-05	14.462	0.26688	0.21955	0.22161
																						Mean766	30.8306	1.39054	0.000400262	1.70982e-05	31.1281	1.45904	0.21119	0.2134	0.0152	1.05724e-05									Mean1625	17.3106	0.23236	0.000340397	1.08356e-05	19.0037	0.25051	0.08495	0.08574
																						Mean767	17.5821	0.5266	0.000460896	1.94908e-05	18.0003	0.55715	0.20366	0.20579	0.01522	1.0586e-05									Mean1626	15.7542	0.33641	0.000750507	2.67267e-05	17.487	0.34322	0.05396	0.05446
																						Mean768	22.6966	0.53435	0.00104	3.48267e-05	25.1622	0.54175	0.38885	0.39292	0.01526	1.06102e-05									Mean1629	223.948	23.9954	0.00146	5.39819e-05	225.538	24.0168	0.03523	0.03556
																						Mean769	24.878	0.60306	0.000421749	1.38215e-05	25.2006	0.6435	0.30386	0.30704	0.01527	1.06198e-05									Mean1630	15.2146	0.34884	0.000810801	3.05582e-05	15.7221	0.35504	0.05938	0.05994
																						Mean770	28.2181	0.43214	0.000744929	1.73602e-05	30.8534	0.44147	0.39682	0.40097	0.01529	1.06319e-05									Mean1637	9.29249	0.33456	0.000741749	4.46429e-05	9.68359	0.34146	0.02744	0.0277
																						Mean771	14.4816	0.38584	0.000617255	2.63111e-05	15.2601	0.39693	0.17259	0.17439	0.01531	1.06502e-05									Mean1655	31.6877	0.54065	0.000163022	1.19169e-05	30.0349	1.02142	0.10239	0.10335
																						Mean772	15.0688	0.37572	0.000590152	2.38718e-05	15.6465	0.38734	0.217	0.21927	0.01534	1.06668e-05									Mean1660	-207.311	96.0472	-1.19461e-05	5.07592e-06	35.0789	0.3378	1.84918	1.86652
																						Mean773	36.7384	0.50957	0.000968142	1.93383e-05	39.117	0.5173	0.34074	0.3443	0.01536	1.06802e-05									Mean1661	24.3503	0.90001	0.000553943	2.16045e-05	24.6812	0.93692	0.02772	0.02798
																						Mean774	30.4259	1.0582	0.000460839	1.63402e-05	30.8771	1.10459	0.20357	0.20569	0.01537	1.06916e-05									Mean1662	38.7193	0.51952	0.000333147	7.51068e-06	38.6451	0.59574	0.10208	0.10304
																						Mean776	17.4014	0.3168	0.000324926	1.21445e-05	17.6643	0.35225	0.19161	0.19361	0.01539	1.07001e-05									Mean1663	23.7703	0.78592	0.000343954	1.54571e-05	23.9394	0.87716	0.04004	0.04041
																						Mean778	21.8718	0.40591	0.00067194	1.94764e-05	24.7543	0.41613	0.35569	0.35941	0.01541	1.07136e-05									Mean1665	8.78705	0.30941	0.000628796	3.85377e-05	10.0166	0.31795	0.03738	0.03773
																						Mean779	158.375	8.54349	0.000334814	1.03629e-05	158.009	8.75714	0.46387	0.46872	0.01542	1.07208e-05									Mean1667	13.6128	0.29373	0.000563718	2.19209e-05	14.2532	0.30364	0.08036	0.08111
																						Mean780	17.6765	0.37016	0.000400207	1.45934e-05	18.2605	0.39797	0.19735	0.19941	0.01543	1.0731e-05									Mean1674	13.2595	0.96679	0.000981491	7.26875e-05	14.0823	0.98317	0.02895	0.02922
																						Mean781	20.8299	0.4164	0.000700941	2.16444e-05	23.3294	0.42624	0.28939	0.29241	0.01545	1.0746e-05									Mean1676	9.96497	0.44781	0.0014	9.7645e-05	11.1549	0.4513	0.02975	0.03003
																						Mean782	16.3575	0.43521	0.00049115	2.00333e-05	17.1945	0.4573	0.16919	0.17096	0.01547	1.07599e-05									Mean1680	37.7441	1.18825	0.00061012	1.76896e-05	39.4193	1.22347	0.11846	0.11957
																						Mean783	23.6552	0.42005	0.000711098	1.94344e-05	26.0679	0.42977	0.30457	0.30775	0.01549	1.07735e-05									Mean1698	34.513	0.3945	0.000544039	9.76309e-06	35.4873	0.41481	0.1753	0.17695
																						Mean784	118.593	1.95392	0.000521028	6.6229e-06	119.658	2.00066	0.29494	0.29802	0.0155	1.07781e-05									Mean1699	25.813	0.49459	0.00116	3.17719e-05	26.5211	0.50144	0.07031	0.07097
																						Mean785	16.6356	0.39999	0.000655698	2.4788e-05	18.8362	0.41045	0.23855	0.24104	0.01552	1.07953e-05									Mean1702	54.2836	1.87892	0.00228	6.7527e-05	54.8857	1.88831	0.04348	0.04389
																						Mean786	46.9846	0.51884	0.000995423	1.57472e-05	48.6315	0.52644	0.23286	0.23529	0.01554	1.08062e-05									Mean1704	11.3233	0.31436	0.000650172	3.11274e-05	12.154	0.32253	0.04794	0.04839
																						Mean788	7.59808	0.32902	0.000469507	3.59946e-05	9.92867	0.3441	0.15311	0.15471	0.01558	1.08313e-05									Mean1708	10.7286	0.29536	0.000570289	2.81801e-05	11.2547	0.30511	0.03971	0.04008
																						Mean790	17.0441	0.52398	0.000458619	1.99765e-05	17.4809	0.55471	0.17809	0.17995	0.0156	1.08452e-05									Mean1709	12.3984	0.30787	0.000622229	2.69746e-05	12.711	0.31653	0.04754	0.04798
																						Mean791	25.2984	0.68576	0.000470767	1.57975e-05	25.828	0.72136	0.29802	0.30114	0.01561	1.08562e-05									Mean1710	19.2504	0.2223	0.000220049	7.99136e-06	18.2787	0.2202	0.23975	0.242
																						Mean792	25.6139	0.38716	0.000620818	1.4987e-05	28.6176	0.39819	0.41653	0.42088	0.01563	1.08666e-05									Mean1711	14.8317	0.26184	0.000442932	1.56711e-05	16.128	0.2756	0.08297	0.08375
																						Mean796	34.1288	0.4425	0.000774192	1.5139e-05	36.6596	0.45155	0.33827	0.34181	0.01564	1.08771e-05									Mean1716	10.5624	0.41021	0.00115	7.03864e-05	11.8468	0.41444	0.03175	0.03205
																						Mean798	14.2331	0.72384	0.000619268	3.69789e-05	14.8184	0.7468	0.05851	0.05912	0.01568	1.09028e-05									Mean1719	6.9427	0.35063	0.000819723	6.79242e-05	8.1855	0.35675	0.03544	0.03577
																						Mean799	31.4984	0.48963	0.000909792	2.06136e-05	35.0206	0.49768	0.56988	0.57583	0.0157	1.09172e-05									Mean1723	11.4082	0.2256	0.000315592	1.56603e-05	12.4602	0.24431	0.08891	0.08975
																						Mean800	19.6147	0.39722	0.00064812	2.07031e-05	22.0678	0.40779	0.28735	0.29035	0.01572	1.09316e-05									Mean1725	10.1089	0.2153	0.00025102	1.58223e-05	11.6011	0.22804	0.07748	0.07821
																						Mean802	31.7263	0.32579	0.000337634	6.88539e-06	31.594	0.35974	0.96776	0.97788	0.01573	1.09363e-05									Mean1726	10.5881	0.28937	0.000546303	2.72151e-05	11.8525	0.29971	0.05448	0.05499
																						Mean804	31.7084	0.36732	0.000567875	1.08083e-05	33.3194	0.37943	0.51079	0.51613	0.01574	1.09439e-05									Mean1727	9.21948	0.30364	0.000604402	3.50574e-05	9.80476	0.31265	0.03014	0.03042
																						Mean805	7.87721	0.36234	0.000389185	3.17978e-05	8.52812	0.39108	0.05474	0.05532	0.01577	1.0966e-05									Mean1729	20.9315	0.68518	0.000480514	1.94271e-05	22.6026	0.72692	0.09941	0.10034
																						Mean806	30.3616	0.51055	0.000971012	2.35011e-05	32.8536	0.51827	0.20845	0.21063	0.01579	1.09823e-05									Mean1732	10.4388	0.25625	0.000423163	2.13515e-05	10.9616	0.27085	0.04235	0.04275
																						Mean807	31.8512	0.40037	0.000442645	9.06582e-06	33.954	0.42512	0.22127	0.22358	0.0158	1.09886e-05									Mean1734	-385.68	325.123	-6.38194e-06	5.13609e-06	30.2201	0.32392	5.34388	5.39398
																						Mean808	6.44717	0.23183	0.000259693	2.49022e-05	9.08567	0.25103	0.22314	0.22547	0.01583	1.10059e-05									Mean1742	1.65574e-07	923072000000000	-1.35893e-13	757603000	28.0481	0.15183	229.989	232.145
																						Mean809	12.4648	0.33619	0.000487485	2.28954e-05	12.9811	0.3506	0.11966	0.12091	0.01585	1.10219e-05									Mean1745	80.2485	1.30543	0.000206902	6.45792e-06	77.3621	1.73388	0.33277	0.33588
																						Mean811	21.0146	0.47995	0.000881648	2.95348e-05	22.6211	0.48817	0.14827	0.14981	0.01588	1.10424e-05									Mean1746	14.2345	0.31581	0.000656509	2.50533e-05	15.3879	0.32388	0.05627	0.0568
																						Mean812	18.0179	0.4166	0.000701481	2.50485e-05	21.1432	0.42643	0.46808	0.47298	0.0159	1.10598e-05									Mean1762	9.56955	0.36875	0.000913292	5.6802e-05	10.0778	0.37416	0.03211	0.03241
																						Mean813	8.22378	0.41091	0.000685729	5.32263e-05	9.61613	0.42095	0.10335	0.10443	0.01596	1.10968e-05									Mean1765	15.0282	0.3918	0.00021112	1.70519e-05	16.203	0.57066	0.07165	0.07232
																						Mean814	4.95355	0.54932	0.000326826	5.71792e-05	5.43397	0.61421	0.02649	0.02677	0.01601	1.11366e-05									Mean1766	8.67867	0.27429	0.000488352	2.94716e-05	10.0149	0.28636	0.05393	0.05443
																						Mean815	12.1244	0.46429	0.000531076	2.99091e-05	12.5772	0.48469	0.13352	0.13491	0.01604	1.11574e-05									Mean1767	8.69269	1.87259	0.00227	0.000419802	9.27613	1.88198	0.01224	0.01235
																						Mean816	20.9471	1.61717	0.000598264	3.79045e-05	21.5155	1.65213	0.06704	0.06774	0.01608	1.11838e-05									Mean1774	27.8145	0.21618	0.000240335	5.6659e-06	26.3429	0.22533	0.28142	0.28406
																						Mean817	18.3895	0.44181	0.000316562	1.35651e-05	18.7331	0.50007	0.18431	0.18623	0.0161	1.11932e-05									Mean1775	25.3028	0.22045	0.000294147	6.78459e-06	24.7163	0.23893	0.33242	0.33554
																						Mean818	10.7515	0.41204	0.000458964	2.80353e-05	11.1626	0.43581	0.12075	0.12201	0.01612	1.12127e-05									Mean1779	27.514	0.22021	0.000224814	5.62005e-06	27.6548	0.2214	0.49242	0.49704
																						Mean819	18.2763	0.37977	0.000413727	1.46327e-05	18.6	0.40652	0.36376	0.36756	0.01614	1.12229e-05									Mean1787	7.39506	0.37434	0.000943422	7.67532e-05	8.44166	0.37956	0.02759	0.02785
																						Mean821	18.6851	0.34475	0.000364381	1.25472e-05	18.8659	0.37581	0.44364	0.44827	0.01615	1.12316e-05									Mean1788	29.071	1.43077	0.000235773	1.78394e-05	30.1514	1.74511	0.07651	0.07723
																						Mean822	17.8125	0.39187	0.000430732	1.5708e-05	18.1331	0.4174	0.34836	0.352	0.01617	1.12425e-05									Mean1789	58.5232	1.95361	0.000441607	1.20409e-05	58.4677	2.03179	0.44054	0.44467
																						Mean824	9.2971	0.29574	0.000457286	2.72103e-05	12.383	0.30755	0.42573	0.43018	0.01619	1.12614e-05									Mean1804	22.6924	0.24842	0.000395914	9.27146e-06	22.9993	0.26422	0.14196	0.14329
																						Mean826	34.658	2.04191	0.000574659	2.53695e-05	35.3315	2.08206	0.12142	0.12269	0.01622	1.12791e-05									Mean1809	22.4624	0.26478	0.000453485	1.05813e-05	23.7125	0.27812	0.14358	0.14492
																						Mean828	7.56691	0.32897	0.000469383	3.61322e-05	9.81107	0.34406	0.20727	0.20943	0.01626	1.13042e-05									Mean1810	545.605	11.8281	8.2199e-05	5.34906e-05	357.252	124.904	0.92714	0.93476
																						Mean832	29.0934	1.30158	0.000526255	2.1424e-05	29.7329	1.34144	0.17729	0.17914	0.01628	1.13191e-05									Mean1815	14.1953	0.2664	0.000459332	1.69519e-05	15.4331	0.27952	0.07888	0.07962
																						Mean833	12.7602	0.37362	0.000584559	2.78527e-05	15.3604	0.38536	0.20746	0.20962	0.0163	1.13385e-05									Mean1818	8.98183	0.33443	0.000741163	4.6141e-05	9.64844	0.34135	0.02825	0.02851
																						Mean836	13.094	0.48181	0.000887031	4.78152e-05	15.187	0.48999	0.24405	0.2466	0.01635	1.13717e-05									Mean1819	15.0358	0.24742	0.000392473	1.38916e-05	15.4619	0.26338	0.07544	0.07615
																						Mean838	15.4728	0.43487	0.000752639	3.21125e-05	17.3636	0.44413	0.14022	0.14169	0.01638	1.1394e-05									Mean1822	9.02034	0.22745	0.000322603	2.00755e-05	9.84939	0.24607	0.04964	0.05011
																						Mean839	15.7189	0.3571	0.000381793	1.56234e-05	15.9868	0.38649	0.28654	0.28954	0.0164	1.14049e-05									Mean1841	20.7989	0.2241	0.000309706	8.49409e-06	22.0671	0.24284	0.169	0.17058
																						Mean840	13.3919	0.39314	0.000432517	2.09922e-05	13.8707	0.41855	0.15404	0.15565	0.01642	1.14195e-05									Mean1843	24.9222	0.38594	0.000528921	1.30614e-05	27.0129	0.40687	0.09751	0.09842
																						Mean841	17.4774	0.3721	0.000402935	1.48675e-05	17.7488	0.39969	0.35855	0.3623	0.01644	1.14298e-05									Mean1844	34.4647	0.48548	0.000217988	8.29957e-06	33.6463	0.68773	0.24135	0.24361
																						Mean842	14.3998	0.40722	0.000675539	2.97943e-05	16.5986	0.41739	0.1833	0.18521	0.01647	1.14506e-05									Mean1848	10.5133	0.31141	0.000637381	3.27349e-05	12.0575	0.3198	0.04458	0.045
																						Mean843	15.3096	0.46299	0.000529314	2.35822e-05	15.7928	0.48347	0.15021	0.15177	0.01649	1.1467e-05									Mean1849	7.01109	0.31599	0.000657307	5.094e-05	8.53099	0.32405	0.03254	0.03284
																						Mean844	14.782	0.70875	0.000608055	3.45925e-05	15.4057	0.73207	0.06555	0.06624	0.01652	1.1491e-05									Mean1853	22.6048	0.66858	0.000418884	1.62505e-05	22.9151	0.7229	0.05272	0.05321
																						Mean845	8.14735	0.41095	0.000685833	5.37365e-05	10.1782	0.42098	0.17808	0.17994	0.01658	1.15284e-05									Mean1864	16.5038	0.55613	0.000311819	1.79883e-05	17.8598	0.64922	0.04835	0.0488
																						Mean846	7.70182	0.39805	0.000650407	5.29712e-05	9.49244	0.4086	0.13641	0.13784	0.01663	1.15652e-05									Mean1890	8.21222	0.332	0.000729771	4.94888e-05	10.6154	0.33905	0.05801	0.05855
																						Mean848	15.6267	0.41248	0.000690064	2.82494e-05	17.8531	0.42246	0.3245	0.32789	0.01666	1.15849e-05									Mean1891	17.8846	0.40362	0.000560098	1.95381e-05	19.7478	0.42332	0.08641	0.08722
																						Mean849	15.5482	0.62994	0.000745494	3.81236e-05	16.2483	0.64543	0.0878	0.08872	0.0167	1.16114e-05									Mean1894	6.83069	0.32796	0.000711063	5.75933e-05	7.2111	0.33524	0.0222	0.02241
																						Mean850	21.4494	0.4516	0.000323264	1.18629e-05	21.4421	0.50829	0.39173	0.39582	0.01671	1.16196e-05									Mean1896	15.2223	0.25138	0.000406153	1.41235e-05	16.2265	0.26672	0.06615	0.06677
																						Mean851	39.6147	0.43859	0.000763133	1.27849e-05	40.5339	0.44775	0.50526	0.51054	0.01672	1.16285e-05									Mean1897	10.3521	0.29289	0.000560341	2.86318e-05	11.1944	0.30288	0.03748	0.03783
																						Mean852	23.9618	0.50122	0.000943631	2.85652e-05	26.1961	0.50907	0.30546	0.30865	0.01675	1.16484e-05									Mean1898	11.4691	0.28467	0.000527871	2.42008e-05	12.6975	0.29551	0.04858	0.04903
																						Mean853	11.1224	0.37536	0.000589178	3.22744e-05	13.1053	0.387	0.14379	0.14529	0.01678	1.16708e-05									Mean1921	57.2679	0.33014	0.000180473	4.264e-06	53.3279	0.51744	0.47198	0.4764
																						Mean854	40.3395	1.53614	0.000532783	1.71915e-05	41.0706	1.57763	0.17812	0.17998	0.0168	1.16828e-05									Mean1927	35.8486	0.50383	0.000451418	9.24873e-06	36.9267	0.54224	0.13922	0.14053
																						Mean855	12.2167	0.55415	0.0011	7.01883e-05	13.4955	0.56133	0.12582	0.12713	0.01687	1.17316e-05									Mean1930	9.90789	0.26425	0.000451594	2.38933e-05	10.8255	0.27767	0.07277	0.07345
																						Mean856	6.32591	0.30771	0.000417251	3.81001e-05	8.88789	0.32514	0.21551	0.21776	0.01691	1.17581e-05									Mean1957	114.831	3.38447	0.000748761	1.3313e-05	115.657	3.41952	0.08738	0.0882
																						Mean857	22.9781	0.37041	0.000576047	1.51839e-05	25.9681	0.38233	0.29973	0.30286	0.01692	1.17687e-05									Mean1958	18.7816	0.26371	0.000449652	1.25527e-05	20.1871	0.27721	0.07927	0.08002
																						Mean858	36.7766	0.41424	0.000694932	1.21175e-05	38.2869	0.42415	0.25124	0.25386	0.01694	1.17771e-05									Mean1963	18.8443	0.22967	0.000330752	9.76438e-06	19.3224	0.24811	0.1857	0.18744
																						Mean859	116.691	5.67119	0.000285469	1.00382e-05	114.8	5.94729	0.90938	0.91888	0.01695	1.17841e-05									Mean1968	35.6114	1.09827	0.000344411	1.2489e-05	36.9992	1.20558	0.07815	0.07888
																						Mean860	15.0624	0.52015	0.000455269	2.23906e-05	15.5975	0.55113	0.12806	0.12939	0.01697	1.17996e-05									Mean1971	10.2932	0.29914	0.000585745	3.02811e-05	11.0102	0.30855	0.04953	0.04999
																						Mean862	37.4875	1.05427	0.000389241	1.17812e-05	37.8446	1.11878	0.44772	0.4524	0.01698	1.18078e-05									Mean1972	99.9724	26.8018	0.000474681	4.84624e-05	101.586	26.9734	0.02612	0.02637
																						Mean863	20.0469	0.29431	0.000385356	1.11165e-05	21.4066	0.31353	0.16138	0.16307	0.01699	1.18156e-05									Mean1973	229.97	32.5584	0.000907753	4.05352e-05	230.603	32.5987	0.03716	0.03751
																						Mean865	30.8131	1.84583	0.000517919	2.45027e-05	31.4155	1.89221	0.12205	0.12333	0.01702	1.18326e-05									Mean1975	10.2918	0.31256	0.000642374	3.37534e-05	11.9082	0.32087	0.04456	0.04498
																						Mean866	13.5014	0.42284	0.000718879	3.45578e-05	16.0092	0.43247	0.20704	0.2092	0.01705	1.18566e-05									Mean1997	133.194	14.2652	0.000456662	2.17628e-05	134.092	14.4141	0.05297	0.05347
																						Mean867	14.3218	0.43695	0.000493558	2.3023e-05	14.9701	0.45893	0.09871	0.09975	0.01707	1.18726e-05									Mean1998	13.2315	0.72417	0.000535682	3.43937e-05	13.5374	0.75923	0.02805	0.02831
																						Mean868	9.84142	0.44803	0.000508823	3.48367e-05	10.5178	0.46933	0.04601	0.04649	0.01711	1.18969e-05									Mean2002	16.5358	0.26574	0.000456948	1.44793e-05	17.4457	0.27895	0.1006	0.10154
																						Mean870	16.1505	0.46641	0.000533963	2.26157e-05	17.922	0.48671	0.16135	0.16303	0.01713	1.19126e-05									Mean2003	16.9826	0.24807	0.000394727	1.23577e-05	18.3006	0.26393	0.2095	0.21146
																						Mean873	16.148	0.43335	0.000488585	2.01597e-05	16.72	0.45557	0.20109	0.2032	0.01715	1.19266e-05									Mean2004	50.6057	3.48332	0.00117	4.91705e-05	50.9439	3.50355	0.05254	0.05304
																						Mean874	21.6222	0.45034	0.000796497	2.4861e-05	22.8249	0.45919	0.15497	0.15659	0.01718	1.19439e-05									Mean2006	24.3699	0.25716	0.000426335	9.20762e-06	25.4491	0.27161	0.21619	0.21822
																						Mean875	21.4645	0.39055	0.000428885	1.29717e-05	21.9422	0.41621	0.46691	0.47179	0.01719	1.19529e-05									Mean2008	10.7856	0.31597	0.000657233	3.31086e-05	11.1478	0.32403	0.03086	0.03114
																						Mean876	20.1199	0.41148	0.000458185	1.49507e-05	20.6306	0.4353	0.31695	0.32026	0.0172	1.19633e-05									Mean2010	11.817	0.37378	0.000940373	4.78247e-05	12.7297	0.37902	0.02537	0.02561
																						Mean877	10.6605	0.41114	0.000686366	4.11115e-05	11.4367	0.42117	0.07528	0.07607	0.01724	1.19919e-05									Mean2024	31.7976	0.22388	0.000217045	4.82323e-06	30.9831	0.21944	0.3211	0.32411
																						Mean878	22.6288	0.25245	0.000287798	7.79206e-06	24.5337	0.27806	0.33206	0.33553	0.01725	1.19973e-05									Mean2033	19.1152	0.2441	0.000381065	1.06684e-05	19.1903	0.26058	0.09971	0.10065
																						Mean880	18.2609	0.30551	0.000411973	1.3029e-05	18.7232	0.32322	0.36414	0.36795	0.01727	1.20064e-05									Mean2037	9629.12	3111.87	0.00116	5.52042e-05	9630.48	3111.92	0.0187	0.01887
																						Mean881	18.936	0.40381	0.000666151	2.22382e-05	21.2877	0.41411	0.2031	0.20522	0.01729	1.20218e-05									Mean2039	13.0471	0.22944	0.000329951	1.40808e-05	13.3851	0.24791	0.0838	0.08459
																						Mean883	6.94588	0.31143	0.000426239	3.547e-05	8.77237	0.32841	0.14428	0.14579	0.01732	1.20465e-05									Mean2051	32.6219	0.43002	0.000256277	7.85831e-06	32.0746	0.55201	0.13839	0.13969
																						Mean884	21.6333	0.27378	0.000337647	9.165e-06	21.724	0.29615	0.5025	0.50776	0.01733	1.20529e-05									Mean2052	43.3591	0.37599	0.000404336	6.14803e-06	44.1251	0.41271	0.33916	0.34234
																						Mean885	22.5333	0.37965	0.000413567	1.18633e-05	22.9049	0.40641	0.49963	0.50485	0.01734	1.20611e-05									Mean2059	84.4126	1.18319	0.000432908	6.09752e-06	84.2346	1.25021	0.27624	0.27882
																						Mean886	11.4693	0.475	0.000545629	3.2783e-05	12.0002	0.49488	0.06743	0.06814	0.01738	1.20839e-05									Mean2060	-8.66945e-09	2112900000000000	4.2138e-14	10269800000	20.7641	0.19941	198.615	200.477
																						Mean887	24.2852	0.27132	0.000331984	8.05315e-06	24.3191	0.29409	0.87146	0.88057	0.01738	1.20895e-05									Mean2064	61.9361	6.57055	0.00169	9.13336e-05	62.861	6.58657	0.0351	0.03543
																						Mean888	17.0615	0.40853	0.000454061	1.74409e-05	17.5587	0.43259	0.20092	0.20302	0.0174	1.21017e-05									Mean2065	10.8314	0.3243	0.000694374	3.52645e-05	11.0753	0.33181	0.04806	0.04851
																						Mean889	14.521	0.3411	0.000499937	2.02349e-05	15.2371	0.35509	0.14506	0.14658	0.01742	1.21157e-05									Mean2068	10.9529	0.2178	0.000280442	1.53006e-05	11.2446	0.23547	0.08721	0.08803
																						Mean890	20.5299	0.54394	0.00107	4.00671e-05	22.4233	0.55123	0.12745	0.12878	0.01746	1.21436e-05									Mean2072	21.3591	0.23344	0.000344219	8.8496e-06	22.9261	0.25146	0.15305	0.15448
																						Mean891	21.8477	0.34928	0.000370767	1.09149e-05	22.1517	0.37971	0.52213	0.52758	0.01747	1.21512e-05									Mean2086	37.6163	0.87753	0.000321229	1.02051e-05	38.7678	0.99065	0.15648	0.15794
																						Mean892	16.3016	0.42738	0.000480303	1.95471e-05	16.7352	0.45	0.18418	0.1861	0.01749	1.21648e-05									Mean2088	21.1165	0.27428	0.000176492	7.08876e-06	18.9055	0.20919	0.35064	0.35392
																						Mean893	28.159	0.29495	0.00029382	6.93549e-06	29.1803	0.33432	0.24383	0.24638	0.0175	1.21696e-05									Mean2099	11.4816	0.26862	0.000467441	2.13202e-05	12.8714	0.28144	0.06167	0.06225
																						Mean895	17.7773	0.37609	0.000408546	1.48371e-05	18.1734	0.40323	0.22503	0.22738	0.01751	1.21799e-05									Mean2109	16.094	0.22085	0.000223243	9.59127e-06	17.7522	0.22101	0.13199	0.13322
																						Mean896	7.55245	0.73636	0.00165	0.000210375	9.2945	0.74239	0.14729	0.14883	0.01773	1.23262e-05									Mean2111	7.20039	0.32086	0.000678892	5.1594e-05	8.1448	0.32859	0.02384	0.02406
																						Mean898	255.298	18.2057	0.00040542	1.23501e-05	254.946	18.3771	0.63415	0.64078	0.01774	1.23348e-05									Mean2116	1.62544e-07	934596000000000	-4.10393e-14	235968000	28.6001	0.15185	338.624	341.799
																						Mean899	29.5229	0.46123	0.000827636	1.92163e-05	31.5624	0.46983	0.2905	0.29354	0.01776	1.23482e-05									Mean2121	13.935	0.23193	0.000338877	1.34195e-05	13.8543	0.25014	0.10549	0.10648
																						Mean900	16.778	0.45416	0.000517242	2.08747e-05	17.4316	0.47511	0.18731	0.18926	0.01778	1.23627e-05									Mean2148	7.89723	0.33934	0.000764497	5.4585e-05	10.8481	0.346	0.13026	0.13148
																						Mean902	29.3475	0.86454	0.000348611	1.26847e-05	29.4533	0.93854	0.43794	0.44251	0.01779	1.23715e-05									Mean2150	56.9124	1.12665	0.0011	2.08382e-05	58.3115	1.14209	0.19155	0.19334
																						Mean903	15.7672	0.35345	0.000376656	1.53635e-05	16.031	0.38333	0.21132	0.21353	0.01781	1.23822e-05									Mean2151	40.2941	0.33749	0.000442941	6.61105e-06	41.7403	0.36313	0.18737	0.18913
																						Mean904	20.0784	0.37007	0.000400073	1.2843e-05	20.3608	0.39789	0.41628	0.42063	0.01782	1.23911e-05									Mean2152	12.8808	0.26128	0.000440927	1.79681e-05	14.2664	0.27512	0.06143	0.062
																						Mean905	20.6239	0.31227	0.000428272	1.20052e-05	21.061	0.32915	0.38243	0.38643	0.01783	1.23995e-05									Mean2153	7.03896	0.32508	0.0006979	5.46057e-05	8.00178	0.33253	0.03563	0.03597
																						Mean906	24.9359	0.2571	0.000298937	7.25322e-06	24.7275	0.28209	0.94767	0.95757	0.01784	1.24045e-05									Mean2155	14.2737	0.25847	0.00043097	1.58758e-05	14.8557	0.27273	0.06843	0.06908
																						Mean907	23.1811	0.4102	0.000683763	1.88101e-05	25.318	0.42026	0.22002	0.22232	0.01786	1.24176e-05									Mean2173	7.29347	0.29819	0.000581847	4.24097e-05	8.26322	0.30768	0.0324	0.0327
																						Mean908	16.4153	0.46571	0.000840495	3.53222e-05	19.159	0.47421	0.44916	0.45385	0.01789	1.24422e-05									Mean2175	7.13919	0.3667	0.000902425	7.49389e-05	8.21855	0.37219	0.03697	0.03731
																						Mean909	17.2587	0.42168	0.00047239	1.80879e-05	17.9186	0.44471	0.1795	0.18138	0.01791	1.24547e-05									Mean2182	8.36198	0.36621	0.000899813	6.37351e-05	8.74234	0.37171	0.01951	0.01969
																						Mean910	16.9876	0.28243	0.000357622	1.22539e-05	17.2043	0.30342	0.35857	0.36232	0.01792	1.24633e-05									Mean2184	21.9595	0.3154	0.000654723	1.61864e-05	22.8766	0.3235	0.23274	0.23492
																						Mean911	15.8513	0.4048	0.000668893	2.67116e-05	18.5503	0.41507	0.29272	0.29578	0.01795	1.24818e-05									Mean2196	14.0781	0.28146	0.000515484	1.92208e-05	14.5547	0.29267	0.04543	0.04585
																						Mean912	45.7113	1.78015	0.00044119	1.42624e-05	46.0908	1.84196	0.41945	0.42383	0.01796	1.24918e-05									Mean2199	61.2483	2.4085	0.00176	5.1075e-05	61.7888	2.4212	0.05176	0.05225
																						Mean913	9.76609	0.44815	0.000508988	3.51202e-05	10.3828	0.46944	0.04715	0.04764	0.018	1.25162e-05									Mean2203	21.2013	0.26899	0.000468786	1.15787e-05	21.4622	0.28176	0.09192	0.09278
																						Mean914	7.11331	0.32125	0.000331212	3.01986e-05	9.3887	0.35594	0.13075	0.13212	0.01803	1.25372e-05									Mean2206	29.5337	0.26819	0.00046585	8.26074e-06	29.5867	0.28106	0.15945	0.16094
																						Mean915	39.359	0.26594	0.000249797	4.47747e-06	39.5108	0.30994	0.62111	0.6276	0.01803	1.25403e-05									Mean2207	38.5516	2.13342	0.000629742	2.52007e-05	39.2848	2.17416	0.06115	0.06172
																						Mean916	31.7079	0.25691	0.000233352	5.37141e-06	31.2702	0.30114	0.41286	0.41717	0.01804	1.2544e-05									Mean2210	6.75741	0.33759	0.000756116	6.29028e-05	7.40366	0.34434	0.02438	0.02461
																						Mean917	70.5579	2.89138	0.000452631	1.27534e-05	70.9329	2.96055	0.51788	0.5233	0.01805	1.25529e-05									Mean2229	18.3806	0.31079	0.000634733	1.86307e-05	19.1954	0.31923	0.08667	0.08748
																						Mean918	46.7827	1.80577	0.000444684	1.41364e-05	47.0785	1.86692	0.39447	0.39859	0.01807	1.25627e-05									Mean2230	5.82619	0.30343	0.00060349	5.5378e-05	7.63999	0.31245	0.03542	0.03576
																						Mean919	20.3125	0.3861	0.00042263	1.34815e-05	20.7196	0.4122	0.37675	0.38068	0.01808	1.25721e-05									Mean2241	46.0205	1.19005	0.000509075	1.25085e-05	46.1967	1.2387	0.08711	0.08793
																						Mean920	15.2602	0.51346	0.000597151	2.79151e-05	15.9954	0.53177	0.08905	0.08998	0.01811	1.25915e-05									Mean2248	20.5303	0.22639	0.000318633	8.75301e-06	22.1245	0.24508	0.20815	0.2101
																						Mean923	15.577	0.3242	0.000457519	1.70609e-05	16.214	0.33976	0.11535	0.11655	0.01812	1.26034e-05									Mean2250	33.4098	0.23502	0.000349723	5.72105e-06	32.8291	0.25283	0.6257	0.63156
																						Mean924	9.03941	0.48303	0.000556487	4.27226e-05	9.64041	0.50254	0.04231	0.04276	0.01817	1.26331e-05									Mean2253	26.4137	0.40695	0.000220529	9.75017e-06	26.7167	0.57433	0.10726	0.10826
																						Mean925	7.43023	0.3374	0.000604137	4.68721e-05	8.12073	0.34549	0.0336	0.03395	0.01821	1.26657e-05									Mean2254	6.84611	0.31884	0.00066992	5.33877e-05	8.35695	0.32671	0.02769	0.02795
																						Mean926	19.1349	0.37982	0.000413795	1.39787e-05	19.4945	0.40656	0.32092	0.32428	0.01823	1.26754e-05									Mean2258	11.3006	0.40738	0.00113	6.44346e-05	12.2752	0.41168	0.03891	0.03927
																						Mean927	18.1611	0.56711	0.000495596	2.0805e-05	18.7161	0.59537	0.23545	0.23791	0.01825	1.26899e-05									Mean2259	9.65334	0.33593	0.000748252	4.34517e-05	11.6443	0.34277	0.05111	0.05159
																						Mean928	22.1753	0.33726	0.000353812	1.028e-05	22.2083	0.36941	0.61178	0.61818	0.01826	1.2697e-05									Mean2263	25.4586	0.54071	0.000420189	1.29199e-05	26.8869	0.58777	0.06151	0.06209
																						Mean929	17.5754	0.42125	0.000471791	1.77343e-05	18.0949	0.44431	0.26915	0.27196	0.01828	1.27094e-05									Mean2264	13.8797	0.33935	0.000764524	3.10589e-05	16.0065	0.34601	0.06557	0.06618
																						Mean930	9.96867	0.34227	0.000502905	2.96798e-05	12.0928	0.35616	0.26148	0.26421	0.01831	1.273e-05									Mean2265	13.3915	0.29644	0.000574676	2.27734e-05	15.1863	0.30609	0.17697	0.17863
																						Mean931	32.5815	0.30821	0.000219461	5.93191e-06	33.1986	0.39385	0.60275	0.60905	0.01831	1.27341e-05									Mean2271	26.4572	0.42236	0.000252801	9.60994e-06	26.5507	0.54645	0.12287	0.12403
																						Mean932	14.429	0.32896	0.000469341	1.89466e-05	14.9816	0.34404	0.24889	0.25149	0.01833	1.27473e-05									Mean2272	33.1945	0.49711	0.000127186	4.67844e-06	28.2561	0.19681	0.28247	0.28511
																						Mean933	18.9051	0.23674	0.000243601	8.49695e-06	18.5793	0.26215	0.41339	0.41771	0.01834	1.27532e-05									Mean2273	65.8617	6.5102	0.000816813	3.91607e-05	66.7343	6.54572	0.03205	0.03235
																						Mean934	18.8563	0.36033	0.000386348	1.31833e-05	19.2249	0.38931	0.28915	0.29217	0.01835	1.27624e-05									Mean2274	10.8189	0.25353	0.00041362	2.01887e-05	12.055	0.26853	0.05073	0.05121
																						Mean935	17.054	0.39526	0.000435489	1.66146e-05	17.5297	0.42047	0.23712	0.2396	0.01837	1.27739e-05									Mean2275	39.3525	0.47821	0.000283886	6.87967e-06	40.6974	0.58235	0.3327	0.33582
																						Mean937	51.2414	0.36079	0.000387005	4.85982e-06	53.0373	0.38972	0.79873	0.80708	0.01837	1.27773e-05									Mean2277	14.8469	0.27968	0.000508689	1.79716e-05	16.7801	0.29109	0.12423	0.12539
																						Mean938	26.5697	0.2614	0.000241925	6.52286e-06	25.7431	0.30571	0.78274	0.79092	0.01838	1.27818e-05									Mean2279	6.65183	0.33001	0.000720523	6.01273e-05	7.33758	0.33717	0.02281	0.02303
																						Mean939	18.2423	0.31304	0.000430162	1.36352e-05	18.7442	0.32983	0.31699	0.32031	0.01839	1.27913e-05									Mean2283	51.7231	0.55093	0.000309587	5.7034e-06	50.917	0.64499	0.37626	0.37979
																						Mean941	19.0377	0.26228	0.000311076	9.77321e-06	18.9378	0.28649	0.57278	0.57877	0.0184	1.27981e-05									Mean2284	16.7785	0.27213	0.000480326	1.49901e-05	17.3019	0.28448	0.08571	0.08652
																						Mean943	36.6896	0.36025	0.000549306	8.96434e-06	38.2436	0.3728	0.31276	0.31603	0.01841	1.28044e-05									Mean2297	14.5245	0.24522	0.000384889	1.41532e-05	16.3939	0.26152	0.1035	0.10447
																						Mean944	26.9699	0.49938	0.00093825	2.51697e-05	28.3924	0.50726	0.16164	0.16332	0.01844	1.28219e-05									Mean2298	20.2143	0.21628	0.000239649	7.78909e-06	20.881	0.22516	0.29059	0.29331
																						Mean945	10.4154	0.34867	0.000519297	2.95032e-05	11.161	0.36205	0.05914	0.05976	0.01847	1.28424e-05									Mean2299	2095	736.995	0.000740378	4.91559e-05	2095.76	737.135	0.03406	0.03288
																						Mean946	31.4158	0.38413	0.000612673	1.20123e-05	33.7314	0.39531	0.29614	0.29923	0.01848	1.28507e-05									Mean2305	83.0476	1.49409	0.000498087	7.79322e-06	82.7539	1.54946	0.62585	0.63172
																						Mean948	9.37021	0.52185	0.000608233	4.66672e-05	10.051	0.53988	0.04061	0.04103	0.01853	1.28832e-05									Mean2313	42.095	0.50063	0.000577269	9.50582e-06	42.2179	0.52412	0.43331	0.43737
																						Mean950	6.89885	0.40855	0.000454094	4.31369e-05	8.80366	0.43261	0.14183	0.14331	0.01857	1.29132e-05									Mean2315	30.1722	0.26298	0.000447013	7.7703e-06	30.489	0.27658	0.2048	0.20672
																						Mean951	12.2616	0.45668	0.000520684	2.88127e-05	12.9323	0.47749	0.0866	0.08751	0.0186	1.29332e-05									Mean2317	25.1533	0.26852	0.000296574	7.83943e-06	27.2238	0.31252	0.30366	0.30651
																						Mean952	49.3099	3.04837	0.000531662	2.14024e-05	49.878	3.09995	0.18375	0.18567	0.01862	1.29481e-05									Mean2325	8.43699	0.52261	0.00199	0.000189734	10.0578	0.52507	0.0639	0.0645
																						Mean953	17.6131	0.52802	0.000462135	1.9525e-05	18.0836	0.55849	0.16617	0.16791	0.01864	1.29617e-05									Mean2328	47.6104	0.55875	0.000260053	6.2013e-06	48.727	0.70296	0.29839	0.30119
																						Mean954	11.6816	0.38314	0.000610004	3.21242e-05	13.4984	0.39437	0.22999	0.23239	0.01867	1.2984e-05									Mean2329	32.6474	0.38713	0.000199636	8.0019e-06	31.1247	0.58902	0.13571	0.13698
																						Mean956	30.6354	2.1205	0.000484576	2.54073e-05	31.146	2.17527	0.13611	0.13754	0.0187	1.30017e-05									Mean2330	647.876	196.155	0.00235	0.000162066	649.018	196.171	0.03271	0.03301
																						Mean957	7.96524	0.37235	0.000581181	4.42945e-05	9.97668	0.38416	0.1951	0.19714	0.01874	1.30325e-05									Mean2331	5.89304	0.44882	0.00141	0.000166284	6.95324	0.45229	0.02356	0.02378
																						Mean958	12.369	0.4172	0.000466149	2.48312e-05	12.8525	0.44056	0.12055	0.12181	0.01877	1.30498e-05									Mean2332	23.4611	0.226	0.000317125	7.63739e-06	23.8841	0.2447	0.24161	0.24388
																						Mean959	106.543	1.28374	0.000257283	4.04401e-06	104.663	1.46518	1.30511	1.31875	--	--									Mean2340	21.1587	0.25531	0.000419857	1.04603e-05	22.6922	0.27005	0.22521	0.22732
																						Mean960	13.749	0.78939	0.00052755	3.44783e-05	14.32	0.82094	0.05649	0.05708	0.0188	1.30737e-05									Mean2341	21.7244	0.21737	0.000277782	7.67943e-06	22.6766	0.2348	0.24541	0.24771
																						Mean962	34.9036	0.63919	0.000756761	1.73849e-05	36.7864	0.65452	0.18055	0.18243	0.01882	1.30858e-05									Mean2343	7.8673	0.30202	0.000597629	4.05477e-05	9.45523	0.31117	0.04585	0.04628
																						Mean963	149.924	15.6048	0.000480255	2.05676e-05	150.13	15.7077	0.24612	0.24869	0.01884	1.31001e-05									Mean2344	47.6066	0.76676	0.000541541	9.94341e-06	50.3782	0.80223	0.39099	0.39465
																						Mean965	57.8635	0.96174	0.00050641	8.79642e-06	59.885	0.99921	0.40952	0.4138	0.01885	1.31062e-05									Mean2349	14.3399	0.52425	0.000304832	1.99801e-05	15.5825	0.61848	0.0599	0.06046
																						Mean966	36.2761	0.4011	0.000658721	1.14368e-05	38.8608	0.41151	0.44961	0.45431	0.01886	1.31142e-05									Mean2353	17.9685	0.31377	0.000647609	1.95225e-05	18.1148	0.32199	0.06876	0.06941
																						Mean968	70.2823	3.21815	0.000355203	1.19352e-05	70.4776	3.34121	0.54008	0.54573	0.01887	1.31225e-05									Mean2365	35.031	0.55205	0.000248781	8.42621e-06	34.1964	0.71162	0.19577	0.1976
																						Mean969	42.331	2.00015	0.000568494	2.03123e-05	43.1086	2.04075	0.16435	0.16607	0.01889	1.31366e-05									Mean2367	18.5787	0.97664	0.00141	7.83343e-05	18.8963	0.98751	0.01517	0.01531
																						Mean972	12.7032	0.41755	0.000466648	2.42095e-05	14.5214	0.44089	0.14233	0.14382	0.01891	1.31535e-05									Mean2368	43636.8	23283.5	0.00123	7.69328e-05	43637.5	23283.6	0.04777	0.04822
																						Mean973	11.4184	0.45215	0.000514481	3.04596e-05	12.0756	0.47321	0.0802	0.08104	0.01895	1.31746e-05									Mean2372	9.80374	0.34741	0.000803739	4.68898e-05	10.8416	0.35368	0.03786	0.03822
																						Mean974	35.7944	0.73964	0.000446807	1.11576e-05	36.1405	0.78075	0.49826	0.50347	0.01896	1.31824e-05									Mean2373	-333.382	322.409	-6.74237e-06	6.20036e-06	28.8125	0.38209	3.00003	3.02815
																						Mean976	23.5957	0.3219	0.000451834	1.111e-05	23.917	0.3377	0.26846	0.27126	0.01897	1.31901e-05									Mean2376	59.9239	1.21239	0.000439546	8.79105e-06	59.5079	1.27798	0.16687	0.16843
																						Mean978	15.3281	0.37128	0.000401772	1.68997e-05	15.7099	0.39896	0.1975	0.19956	0.01898	1.32019e-05									Mean2378	9.00753	0.35393	0.000836345	5.37402e-05	9.22637	0.35992	0.02553	0.02577
																						Mean979	28.597	0.89259	0.000480163	1.63488e-05	29.1486	0.93233	0.26852	0.27132	0.019	1.32132e-05									Mean2381	5.93296	0.37065	0.000923469	9.29789e-05	6.74249	0.37599	0.01786	0.01802
																						Mean980	17.9841	0.33075	0.000344634	1.23722e-05	18.3376	0.36391	0.26972	0.27254	0.01901	1.32218e-05									Mean2382	9.94936	0.21527	0.000252823	1.61183e-05	9.71168	0.22849	0.05053	0.051
																						Mean981	78.2163	5.44873	0.000406204	1.6466e-05	78.3474	5.55723	0.31787	0.32119	0.01903	1.32333e-05
																						Mean983	10.5706	0.515	0.000599185	4.04942e-05	11.1743	0.53326	0.04778	0.04828	0.01907	1.32615e-05
																						Mean984	16.6863	0.44988	0.000511373	2.06798e-05	17.75	0.47108	0.15848	0.16014	0.01909	1.32758e-05
																						Mean986	11.5639	0.34696	0.000514912	2.63065e-05	13.8186	0.36048	0.32603	0.32944	0.01912	1.32941e-05
																						Mean987	19.7969	0.46854	0.000848646	2.96922e-05	22.3375	0.47698	0.40142	0.40562	0.01915	1.33148e-05
																						Mean989	34.732	3.86504	0.000546278	3.6297e-05	35.2921	3.9175	0.08137	0.08223	0.01918	1.334e-05
																						Mean990	13.951	0.43524	0.000491185	2.34912e-05	14.3685	0.45733	0.15856	0.16021	0.01921	1.33564e-05
																						Mean992	18.9844	0.36561	0.000563372	1.78744e-05	19.705	0.37782	0.34827	0.35191	0.01922	1.33688e-05
																						Mean994	13.1534	0.50471	0.000585537	3.15021e-05	14.0109	0.52334	0.08583	0.08673	0.01926	1.33907e-05
																						Mean995	11.2411	0.42937	0.00073715	4.2955e-05	13.1487	0.43879	0.14631	0.14784	0.0193	1.34206e-05
																						Mean996	11.1454	0.36269	0.000555713	2.99342e-05	11.8244	0.37509	0.0891	0.09003	0.01933	1.34414e-05
																						Mean997	10.2862	0.50961	0.000592047	4.09142e-05	10.9965	0.52806	0.07744	0.07824	0.01937	1.34698e-05
																						Mean998	14.6527	0.45691	0.000521007	2.41306e-05	15.3588	0.47771	0.08881	0.08974	0.01939	1.34866e-05
																						Mean1001	17.8261	0.5067	0.000443431	1.82916e-05	18.2367	0.5386	0.18879	0.19076	0.01941	1.34993e-05
																						Mean1002	12.5208	0.34794	0.00051742	2.44365e-05	13.1631	0.36138	0.07821	0.07903	0.01944	1.35163e-05
																						Mean1003	11.3032	0.35387	0.000532708	2.80304e-05	12.0841	0.36686	0.09233	0.0933	0.01946	1.35358e-05
																						Mean1004	8.81968	0.46001	0.00052524	4.05189e-05	9.60223	0.48064	0.06622	0.06691	0.01951	1.3564e-05
																						Mean1005	20.0366	0.24785	0.000202329	8.04718e-06	19.2214	0.28502	0.43187	0.43638	0.01951	1.35696e-05
																						Mean1006	14.2519	0.32184	0.000451703	1.83881e-05	14.7448	0.33765	0.1442	0.14571	0.01953	1.35824e-05
																						Mean1007	6.07656	0.3355	0.000485752	4.67737e-05	7.68014	0.34997	0.15075	0.15232	0.01958	1.36149e-05
																						Mean1009	11.1893	0.37361	0.000584542	3.1762e-05	13.5083	0.38535	0.28638	0.28937	0.01961	1.3637e-05
																						Mean1010	17.817	0.44385	0.000503068	1.89625e-05	18.3882	0.4654	0.18423	0.18616	0.01963	1.36502e-05
																						Mean1011	41.0885	0.98001	0.000274305	9.00567e-06	40.1952	1.11593	1.05687	1.06792	--	--
																						Mean1012	43.3494	2.44795	0.000468947	1.9152e-05	43.8059	2.50904	0.21776	0.22004	0.01965	1.36635e-05
																						Mean1013	12.1072	0.44471	0.000504254	2.79897e-05	12.6869	0.4662	0.07073	0.07147	0.01968	1.3683e-05
																						Mean1014	17.6605	0.41971	0.000710139	2.59836e-05	19.8699	0.42943	0.17914	0.18101	0.0197	1.3701e-05
																						Mean1015	6.71062	0.31514	0.000322574	3.1301e-05	8.4629	0.35087	0.11634	0.11755	0.01973	1.37228e-05
																						Mean1016	10.0288	0.45601	0.000519775	3.51471e-05	10.5757	0.47686	0.05806	0.05867	0.01977	1.37472e-05
																						Mean1018	37.9167	3.83303	0.000544326	3.29658e-05	38.571	3.88572	0.09629	0.0973	0.0198	1.37702e-05
																						Mean1019	50.6384	4.4793	0.000570421	2.8507e-05	51.2316	4.52978	0.11421	0.11541	0.01983	1.379e-05
																						Mean1020	57.0553	4.56516	0.000534844	2.42569e-05	57.6168	4.62223	0.154	0.15561	0.01985	1.38069e-05
																						Mean1021	18.8174	0.38986	0.000427914	1.47584e-05	19.2641	0.41559	0.40914	0.41341	--	--
																						Mean1022	18.6297	0.41581	0.000360439	1.37912e-05	18.8058	0.45667	0.30179	0.30495	--	--
																						Mean1023	20.3595	0.3311	0.000345118	1.09426e-05	20.484	0.3642	0.56053	0.56639	--	--
																						Mean1024	9.80852	0.41877	0.000707535	4.65516e-05	11.4973	0.42853	0.18817	0.19014	0.0199	1.38392e-05
																						Mean1025	34.6739	0.58007	0.00118	2.73754e-05	37.3512	0.58701	0.40873	0.413	0.01993	1.38583e-05
																						Mean1026	12.6259	0.32572	0.000461278	2.12394e-05	16.6826	0.34112	1.10873	1.12032	0.01995	1.3873e-05
																						Mean1027	26.6624	0.38445	0.00061352	1.41792e-05	27.9455	0.39561	0.13701	0.13844	0.01996	1.38829e-05
																						Mean1028	11.0565	0.37662	0.000592558	3.27033e-05	13.5916	0.3882	0.29243	0.29548	0.02	1.39056e-05
																						Mean1029	26.0855	0.3613	0.000387722	9.56476e-06	26.3335	0.39017	0.73881	0.74653	--	--
																						Mean1030	36.5438	0.3882	0.000623641	1.05666e-05	38.3447	0.39918	0.83764	0.8464	0.02001	1.3913e-05
																						Mean1031	24.1411	0.25939	0.000304325	7.58624e-06	23.848	0.28404	1.11114	1.12275	--	--
																						Mean1032	25.7834	0.42753	0.000371407	1.02826e-05	25.8977	0.46691	0.68694	0.69412	--	--
																						Mean1033	20.3977	0.38219	0.000417125	1.323e-05	20.8296	0.40868	0.38198	0.38598	0.02002	1.39222e-05
																						Mean1035	20.4778	0.32244	0.000332906	1.05364e-05	20.4427	0.35694	0.63429	0.64092	0.02003	1.39295e-05
																						Mean1036	16.1912	0.45996	0.000525169	2.20675e-05	16.9207	0.48059	0.11457	0.11576	0.02005	1.39449e-05
																						Mean1038	32.2539	1.46036	0.00049005	1.94567e-05	32.8286	1.50753	0.16427	0.16598	0.02007	1.39584e-05
																						Mean1039	14.4895	0.43548	0.000491528	2.26381e-05	16.859	0.45756	0.17078	0.17257	0.02009	1.39741e-05
																						Mean1040	28.0504	0.38579	0.000332072	8.45201e-06	27.9585	0.43098	0.88404	0.89328	--	--
																						Mean1042	33.6811	0.25212	0.000222396	4.95184e-06	31.6183	0.29538	2.62913	2.65661	--	--
																						Mean1043	19.6481	0.33826	0.000355224	1.16457e-05	19.7946	0.37027	0.52037	0.52581	--	--
																						Mean1045	25.3868	0.48301	0.000890533	2.48018e-05	27.631	0.49117	0.26317	0.26592	0.02012	1.39914e-05
																						Mean1048	43.1598	0.3694	0.000573374	8.03685e-06	45.231	0.38138	0.58346	0.58956	0.02013	1.3997e-05
																						Mean1049	36.4804	0.79451	0.000376526	1.01475e-05	36.5829	0.85467	0.55504	0.56084	--	--
																						Mean1050	18.2806	0.41636	0.000464987	1.67504e-05	18.7442	0.43979	0.33015	0.3336	0.02014	1.40086e-05
																						Mean1051	23.89	0.44595	0.000388494	1.16562e-05	24.1162	0.48323	0.52961	0.53515	0.02016	1.40167e-05
																						Mean1052	13.804	0.33386	0.000481629	2.03906e-05	14.5286	0.34848	0.07986	0.0807	0.02018	1.40309e-05
																						Mean1053	30.9254	0.30742	0.000311628	6.60399e-06	30.7079	0.34451	1.31034	1.32404	--	--
																						Mean1056	18.2265	0.38642	0.00042308	1.50425e-05	18.5846	0.41248	0.32542	0.32883	0.02019	1.40414e-05
																						Mean1057	21.1866	0.34689	0.000514709	1.43517e-05	22.7893	0.3604	0.17693	0.17877	0.02021	1.40513e-05
																						Mean1058	9.87228	0.4436	0.000502724	3.41925e-05	10.4076	0.46516	0.06243	0.06308	0.02024	1.40751e-05
																						Mean1059	14.7661	0.38498	0.000614941	2.56792e-05	17.3375	0.39611	0.22988	0.23228	0.02027	1.4093e-05
																						Mean1060	11.5494	0.42185	0.00047262	2.70456e-05	12.1141	0.44486	0.06541	0.06609	0.02029	1.41118e-05
																						Mean1061	25.2022	0.61164	0.00127	4.23291e-05	27.1808	0.61832	0.23235	0.23478	0.02034	1.41412e-05
																						Mean1063	36.8534	0.43048	0.000740285	1.31787e-05	38.7579	0.43987	0.41998	0.42438	0.02035	1.41504e-05
																						Mean1064	10.0716	1.38311	0.00054607	6.6202e-05	10.7612	1.42143	0.0376	0.03799	0.02041	1.41964e-05
																						Mean1065	25.6368	0.30688	0.000415256	9.3554e-06	25.9758	0.32441	0.65132	0.65813	--	--
																						Mean1066	19.5096	0.3201	0.000329592	1.09642e-05	19.6683	0.35499	0.48233	0.48737	--	--
																						Mean1067	12.8196	0.47915	0.000551255	2.974e-05	13.7077	0.49884	0.10989	0.11104	0.02044	1.42171e-05
																						Mean1068	19.9339	0.38887	0.000426524	1.38804e-05	20.2621	0.41469	0.43906	0.44364	0.02046	1.42268e-05
																						Mean1069	15.2682	0.47625	0.000870934	3.99464e-05	17.6533	0.48454	0.23823	0.24072	0.0205	1.42545e-05
																						Mean1070	22.572	0.29872	0.000299232	8.7693e-06	22.2981	0.33739	0.74757	0.75539	--	--
																						Mean1071	15.0843	0.37252	0.00040352	1.72531e-05	15.5073	0.40005	0.19052	0.19251	0.02052	1.42665e-05
																						Mean1073	19.1223	0.34331	0.000505565	1.55683e-05	22.1336	0.35711	0.10619	0.1073	0.02053	1.42774e-05
																						Mean1074	73.0486	0.45926	0.000524218	4.87959e-06	73.8593	0.47993	5.66548	5.7247	--	--
																						Mean1078	10.9084	0.47455	0.000545024	3.44171e-05	11.397	0.49445	0.04913	0.04964	0.02057	1.43013e-05
																						Mean1079	5.66612e-07	?	-3.33028e-13	?	43.057	0.11876	804.633	813.044	--	--
																						Mean1080	17.4274	0.34154	0.000501044	1.69038e-05	18.1828	0.35549	0.20902	0.21121	0.02058	1.43131e-05
																						Mean1082	20.7422	0.75372	0.000315788	1.59639e-05	20.8153	0.83921	0.29857	0.30169	--	--
																						Mean1083	21.403	0.33457	0.000350016	1.05445e-05	21.4908	0.36713	0.61718	0.62364	--	--
																						Mean1084	9.05379	0.30589	0.000412888	2.63376e-05	11.4777	0.32355	0.27959	0.28251	0.02061	1.43314e-05
																						Mean1085	21.7458	0.32803	0.000340785	1.01289e-05	21.7659	0.36161	0.61996	0.62644	--	--
																						Mean1086	22.9703	0.45137	0.000513404	1.51e-05	24.1853	0.47247	0.1742	0.17602	0.02062	1.43419e-05
																						Mean1087	40.7633	0.31264	0.000429169	6.08726e-06	41.528	0.32947	0.9299	0.93962	0.02063	1.43461e-05
																						Mean1088	24.0567	0.39675	0.000646848	1.68367e-05	26.6774	0.40735	0.27051	0.27334	0.02065	1.43578e-05
																						Mean1089	10.4017	0.31983	0.00044675	2.48953e-05	11.0644	0.33586	0.06623	0.06692	0.02067	1.43751e-05
																						Mean1090	44.2474	0.2598	0.000238971	3.89303e-06	43.739	0.30413	1.47731	1.49276	0.02068	1.43778e-05
																						Mean1091	14.1275	0.51575	0.000600189	3.03709e-05	14.8251	0.53399	0.10584	0.10695	0.02071	1.4399e-05
																						Mean1092	10.3836	0.48545	0.000559749	3.74903e-05	11.0464	0.50486	0.08819	0.08911	0.02074	1.4425e-05
																						Mean1093	15.3157	0.43189	0.000486557	2.11444e-05	15.9612	0.4542	0.17909	0.18096	0.02076	1.44397e-05
																						Mean1094	17.6429	0.33627	0.000352423	1.28735e-05	17.715	0.36858	0.46135	0.46617	0.02078	1.44487e-05
																						Mean1095	17.705	0.27926	0.00035028	1.15481e-05	17.8086	0.30075	0.51759	0.523	0.02079	1.44567e-05
																						Mean1096	8.0791	0.38134	0.000415931	3.32966e-05	10.3269	0.40792	0.1556	0.15722	0.02082	1.44799e-05
																						Mean1097	16.0031	0.42015	0.000470259	1.93991e-05	16.4147	0.44329	0.19944	0.20153	0.02084	1.44934e-05
																						Mean1098	22.5004	0.33253	0.000347141	9.95438e-06	22.4476	0.36541	0.7241	0.73167	0.02085	1.45003e-05
																						Mean1099	8.07336	0.41281	0.000690979	5.47767e-05	10.0794	0.42277	0.11468	0.11588	0.02091	1.45384e-05
																						Mean1100	62.4698	0.44854	0.000509522	5.49789e-06	63.1774	0.46981	4.81184	4.86214	--	--
																						Mean1101	21.6428	0.35739	0.000382207	1.13596e-05	21.9191	0.38675	0.53878	0.54441	--	--
																						Mean1102	22.0484	0.31736	0.000325721	9.60466e-06	21.9373	0.35272	0.67191	0.67893	--	--
																						Mean1104	23.2459	0.25919	0.000303851	7.86967e-06	22.9857	0.28387	0.89222	0.90154	--	--
																						Mean1105	18.927	0.45994	0.00040135	1.52673e-05	19.2693	0.49578	0.2471	0.24969	0.02092	1.4549e-05
																						Mean1106	26.8024	0.27976	0.00027155	6.90573e-06	26.2833	0.32183	1.05384	1.06485	--	--
																						Mean1107	17.6463	0.35543	0.000379447	1.38301e-05	17.8413	0.38504	0.37933	0.38329	0.02094	1.45586e-05
																						Mean1108	14.8386	0.4559	0.000519618	2.37449e-05	15.4188	0.47675	0.13072	0.13209	0.02096	1.45751e-05
																						Mean1109	13.9455	0.39128	0.000429905	2.00197e-05	14.2815	0.41687	0.1952	0.19724	0.02098	1.4589e-05
																						Mean1110	30.7323	0.30454	0.000307534	6.57674e-06	30.3553	0.34215	1.45943	1.47469	--	--
																						Mean1111	7.63141	0.32527	0.000460181	3.50473e-05	9.55904	0.34072	0.21597	0.21823	0.02101	1.46134e-05
																						Mean1112	15.2556	0.99836	0.000628743	4.15621e-05	15.9327	1.02517	0.07151	0.07226	0.02106	1.46423e-05
																						Mean1113	20.9981	0.40176	0.000660554	1.9831e-05	23.3356	0.41215	0.32692	0.33033	0.02108	1.46561e-05
																						Mean1114	35.4813	0.31819	0.000147931	4.62755e-06	32.8058	0.29189	0.75757	0.76549	--	--
																						Mean1115	7.62414	0.31122	0.000317031	2.71601e-05	9.47992	0.34764	0.17344	0.17525	0.0211	1.4675e-05
																						Mean1116	23.7921	0.37438	0.000406147	1.10155e-05	25.5119	0.40171	0.19584	0.19789	0.02111	1.46827e-05
																						Mean1117	22.4682	0.2861	0.000366136	9.46036e-06	22.7903	0.30652	0.51378	0.51915	0.02112	1.46892e-05
																						Mean1118	12.6446	0.44662	0.000506887	2.69806e-05	13.1719	0.468	0.09043	0.09138	0.02115	1.4708e-05
																						Mean1120	15.5096	0.44704	0.000787093	3.40888e-05	17.0703	0.45597	0.15256	0.15415	0.02118	1.47317e-05
																						Mean1121	7.33576	0.44491	0.000504534	4.62284e-05	8.95773	0.4664	0.10624	0.10735	0.02123	1.47639e-05
																						Mean1122	25.0897	0.37159	0.000402213	1.03367e-05	25.4468	0.39923	0.61246	0.61886	--	--
																						Mean1123	16.5392	0.36004	0.000385939	1.50138e-05	16.7998	0.38906	0.32162	0.32498	0.02125	1.47743e-05
																						Mean1124	10.5307	1.57705	0.000694194	8.59479e-05	11.1779	1.60492	0.03218	0.03251	0.02133	1.48341e-05
																						Mean1126	-420126	393863000	-4.9289e-09	4.62061e-06	24.8127	0.27019	7.24465	7.32038	--	--
																						Mean1127	33.954	0.28706	0.000368373	6.29469e-06	35.2024	0.30734	0.57935	0.5854	0.02134	1.48384e-05
																						Mean1128	16.4896	0.2732	0.000336296	1.19846e-05	16.5279	0.29566	0.4964	0.50159	--	--
																						Mean1129	10.3086	0.36384	0.000558716	3.25802e-05	12.3844	0.37616	0.14698	0.14851	0.02137	1.48611e-05
																						Mean1130	8.81885	0.53114	0.000620419	5.10176e-05	9.45314	0.54887	0.03936	0.03977	0.02142	1.48966e-05
																						Mean1131	29.0766	0.35489	0.000378677	8.37611e-06	31.4866	0.38457	0.44312	0.44775	0.02143	1.49024e-05
																						Mean1132	22.1768	0.29125	0.000288466	8.69118e-06	21.8409	0.33129	0.68445	0.69161	0.02144	1.49084e-05
																						Mean1133	16.5035	0.32962	0.000471006	1.66309e-05	19.326	0.34464	0.3787	0.38266	0.02145	1.492e-05
																						Mean1135	17.6974	3.00669	0.000562371	6.20406e-05	18.3986	3.05324	0.04355	0.04401	0.02152	1.49632e-05
																						Mean1136	20.7222	0.35877	0.000384152	1.19261e-05	20.9701	0.38795	0.5584	0.56424	0.02153	1.49714e-05
																						Mean1137	24.0178	0.3088	0.000313598	8.54616e-06	23.773	0.34565	0.82044	0.82901	0.02154	1.49774e-05
																						Mean1138	19.432	0.3028	0.000405497	1.20507e-05	19.7918	0.32086	0.47701	0.48199	0.02155	1.49858e-05
																						Mean1139	8.47933	0.4006	0.000657366	4.87953e-05	9.275	0.41104	0.06529	0.06597	0.0216	1.50197e-05
																						Mean1140	14.8958	0.42564	0.000726703	3.17888e-05	16.4402	0.43517	0.11065	0.11181	0.02163	1.50418e-05
																						Mean1141	20.0406	0.46751	0.000535462	1.8294e-05	22.0849	0.48775	0.17313	0.17494	0.02165	1.50545e-05
																						Mean1142	23.5895	0.35154	0.000373959	1.01954e-05	23.6352	0.38167	0.80622	0.81465	--	--
																						Mean1144	18.1525	0.48525	0.000897027	3.50496e-05	20.8199	0.49337	0.38719	0.39123	0.02168	1.50789e-05
																						Mean1145	23.5313	0.3461	0.000366287	1.00138e-05	23.6661	0.37697	0.57758	0.58361	0.02169	1.50859e-05
																						Mean1146	13.8067	0.57109	0.00115	6.6412e-05	15.5779	0.57811	0.16285	0.16455	0.02176	1.5132e-05
																						Mean1147	16.0633	0.2735	0.000261971	1.12709e-05	16.3354	0.31656	0.70197	0.7093	0.02177	1.51399e-05
																						Mean1148	22.9031	0.52757	0.000461748	1.49988e-05	23.3051	0.55807	0.28871	0.29173	0.02179	1.51503e-05
																						Mean1149	5.25198	0.39961	0.000654663	7.83519e-05	6.91923	0.41009	0.1277	0.12903	0.02186	1.52048e-05
																						Mean1151	6.89185	0.33045	0.000473077	4.00217e-05	8.77711	0.34539	0.13536	0.13678	0.0219	1.52326e-05
																						Mean1152	23.4523	0.23957	0.000253327	6.98213e-06	22.5932	0.26564	1.31011	1.3238	--	--
																						Mean1154	38.7992	0.42842	0.000734498	1.23838e-05	41.3533	0.43787	0.57011	0.57607	0.02192	1.52412e-05
																						Mean1156	24.2108	0.26084	0.000307724	7.62469e-06	23.9173	0.28528	1.14889	1.1609	--	--
																						Mean1157	18.3351	0.39795	0.00043926	1.56087e-05	18.7425	0.42292	0.3375	0.34103	0.02193	1.52521e-05
																						Mean1158	21.4069	0.32434	0.000335582	1.01498e-05	21.4471	0.35853	0.6042	0.61051	0.02194	1.52592e-05
																						Mean1159	9.78734	0.36268	0.000555681	3.40852e-05	12.2038	0.37508	0.27697	0.27986	0.02198	1.52829e-05
																						Mean1160	14.8289	0.35105	0.000373267	1.61886e-05	15.1145	0.38124	0.22964	0.23204	0.02199	1.52941e-05
																						Mean1161	27.6298	0.45386	0.00032481	9.25174e-06	27.5162	0.51021	0.70902	0.71643	--	--
																						Mean1162	9.51374	0.31619	0.000437817	2.66363e-05	12.0559	0.33261	0.34326	0.34685	0.02202	1.53126e-05
																						Mean1163	11.2148	0.32881	0.000468986	2.43562e-05	11.7255	0.34391	0.13081	0.13218	0.02204	1.53296e-05
																						Mean1164	36.3639	0.34679	0.000514462	8.35689e-06	38.7513	0.36031	0.40538	0.40962	0.02205	1.53354e-05
																						Mean1165	13.5925	0.5214	0.001	5.50376e-05	15.2193	0.52897	0.18494	0.18687	0.02211	1.53737e-05
																						Mean1166	9.38293	0.39859	0.000651869	4.36094e-05	11.17	0.40911	0.19356	0.19558	0.02215	1.5404e-05
																						Mean1167	13.7172	0.48523	0.000559453	2.83587e-05	14.4006	0.50465	0.10119	0.10225	0.02218	1.54237e-05
																						Mean1168	19.5271	0.26283	0.000244464	8.92268e-06	21.9037	0.30707	0.41018	0.41447	0.02219	1.54299e-05
																						Mean1169	22.1811	0.27372	0.000262312	8.16857e-06	21.6656	0.31675	0.88798	0.89726	--	--
																						Mean1170	16.2653	0.53675	0.000627757	2.81358e-05	16.9713	0.55432	0.12887	0.13022	0.02222	1.54495e-05
																						Mean1171	25.9869	0.23853	0.000249958	6.25876e-06	25.2451	0.26443	1.24538	1.2584	--	--
																						Mean1172	17.803	0.29962	0.000397916	1.29106e-05	18.1738	0.3181	0.42767	0.43214	0.02223	1.54585e-05
																						Mean1173	18.716	0.46061	0.000526057	1.91332e-05	20.3833	0.48121	0.11212	0.11329	0.02225	1.54718e-05
																						Mean1174	18.5503	0.35914	0.000384678	1.33411e-05	18.9219	0.38828	0.25507	0.25773	0.02226	1.5481e-05
																						Mean1175	-875013	885030000	-2.93516e-09	2.96869e-06	29.9732	0.18048	18.4512	18.6441	--	--
																						Mean1176	17.7588	0.39999	0.00044212	1.62374e-05	18.237	0.42478	0.26069	0.26341	0.02228	1.54923e-05
																						Mean1177	21.1505	0.27906	0.000349825	9.65606e-06	21.251	0.30058	0.72054	0.72808	0.02229	1.54991e-05
																						Mean1178	22.5518	0.5904	0.00121	4.3764e-05	24.7706	0.59724	0.33353	0.33702	0.02233	1.55295e-05
																						Mean1179	10.3116	0.49134	0.000567669	3.84883e-05	11.0586	0.5105	0.05459	0.05516	0.02237	1.55563e-05
																						Mean1180	16.4045	0.36155	0.000552727	2.02029e-05	17.3427	0.37402	0.20136	0.20346	0.02239	1.55703e-05
																						Mean1181	20.9763	0.66477	0.000574559	2.23311e-05	21.806	0.68927	0.15885	0.16051	0.02241	1.55858e-05
																						Mean1182	15.2037	0.40624	0.000450856	1.94079e-05	15.7175	0.43048	0.21877	0.22106	0.02243	1.55993e-05
																						Mean1184	6.62497	0.3047	0.000410028	3.57419e-05	8.70791	0.32251	0.15115	0.15273	0.02247	1.56242e-05
																						Mean1187	24.5647	0.55014	0.000327239	1.15455e-05	24.4446	0.61491	0.49841	0.50362	--	--
																						Mean1188	20.7473	0.60348	0.000422011	1.65868e-05	21.0311	0.6439	0.2832	0.28616	0.02248	1.56357e-05
																						Mean1189	13.7588	0.32532	0.000460307	1.94452e-05	14.1282	0.34077	0.22332	0.22565	0.0225	1.56492e-05
																						Mean1190	16.5883	0.38809	0.000425417	1.6631e-05	16.6376	0.41398	0.24348	0.24603	0.02252	1.56608e-05
																						Mean1191	34.2247	0.24791	0.000199977	4.69465e-06	31.3737	0.28382	2.51844	2.54477	--	--
																						Mean1192	17.4939	0.4226	0.000473662	1.79038e-05	18.0857	0.44556	0.25877	0.26147	0.02254	1.56733e-05
																						Mean1193	15.3092	0.2898	0.000374779	1.41825e-05	16.9609	0.30967	0.38929	0.39336	0.02255	1.56831e-05
																						Mean1194	23.2299	0.56499	0.000398028	1.3757e-05	23.5026	0.60841	0.31281	0.31608	0.02257	1.56927e-05
																						Mean1195	21.0751	0.26065	0.000240556	8.20017e-06	20.1644	0.30498	1.16142	1.17356	--	--
																						Mean1196	55.3872	0.52559	0.000613151	7.98656e-06	57.1424	0.5435	1.46973	1.48509	0.02257	1.56982e-05
																						Mean1197	16.3436	0.40544	0.00067064	2.59971e-05	18.9252	0.41568	0.3667	0.37053	0.0226	1.57163e-05
																						Mean1198	11.791	0.46378	0.000530386	3.07016e-05	12.3561	0.48421	0.08073	0.08157	0.02263	1.57377e-05
																						Mean1199	21.5322	0.29793	0.000298089	9.16662e-06	21.2202	0.33674	0.92897	0.93868	--	--
																						Mean1200	15.1928	0.35555	0.000379615	1.60707e-05	15.4795	0.38515	0.2956	0.29869	0.02265	1.57488e-05
																						Mean1201	20.9996	0.35356	0.000376801	1.15399e-05	21.2759	0.38341	0.49037	0.49549	0.02266	1.57569e-05
																						Mean1203	14.1103	0.37335	0.00058384	2.51486e-05	16.6235	0.3851	0.34147	0.34504	0.02268	1.57744e-05
																						Mean1205	11.8816	0.42977	0.000738286	4.07253e-05	13.1863	0.43918	0.12193	0.1232	0.02272	1.58027e-05
																						Mean1206	17.2735	0.3646	0.000392375	1.46248e-05	17.6183	0.39307	0.33365	0.33713	0.02274	1.58128e-05
																						Mean1207	10.3301	0.42384	0.000721666	4.54058e-05	12.7362	0.43343	0.35441	0.35812	0.02278	1.58444e-05
																						Mean1208	42.2249	0.38214	0.000417066	6.39008e-06	44.7355	0.40864	0.68	0.68711	0.02279	1.58489e-05
																						Mean1210	12.4265	0.33288	0.000347637	1.80478e-05	12.7472	0.3657	0.12498	0.12628	0.02281	1.58614e-05
																						Mean1212	24.5277	0.37016	0.000400198	1.05168e-05	24.8186	0.39797	0.70085	0.70818	0.02282	1.58687e-05
																						Mean1213	17.0333	0.43479	0.000490568	1.92098e-05	17.6198	0.45691	0.17695	0.1788	0.02284	1.58821e-05
																						Mean1215	-839609	822985000	-3.11128e-09	3.04961e-06	34.18	0.19527	9.01333	9.10755	--	--
																						Mean1217	23.8738	0.25173	0.000286045	7.35663e-06	23.3813	0.27742	1.16507	1.17725	--	--
																						Mean1218	25.8997	0.31518	0.00032264	8.11148e-06	25.7449	0.35091	1.02077	1.03144	--	--
																						Mean1219	5.83399	0.29093	0.000377423	3.74599e-05	7.90193	0.31064	0.16455	0.16627	0.02288	1.59081e-05
																						Mean1220	54.1756	0.31489	0.00043465	4.64174e-06	55.4412	0.33146	3.09949	3.13189	--	--
																						Mean1221	18.5562	0.26899	0.000326607	1.0404e-05	18.431	0.29213	0.6372	0.64386	0.02289	1.59154e-05
																						Mean1222	4.33557	0.33206	0.000346474	5.15697e-05	6.76801	0.36501	0.12929	0.13064	0.02294	1.59512e-05
																						Mean1224	22.7043	0.4132	0.000460575	1.3332e-05	23.1518	0.43688	0.34679	0.35041	0.02295	1.59605e-05
																						Mean1225	9.34556	0.541	0.000633284	4.95962e-05	10.365	0.55844	0.07476	0.07555	0.023	1.5995e-05
																						Mean1226	17.335	0.36406	0.000391599	1.45427e-05	17.6166	0.39258	0.34515	0.34876	0.02302	1.60051e-05
																						Mean1229	18.2937	0.38102	0.000415493	1.46877e-05	18.6283	0.40764	0.36655	0.37038	0.02303	1.60153e-05
																						Mean1230	14.2443	0.27925	0.000350252	1.43527e-05	14.3584	0.30074	0.35171	0.35538	0.02304	1.60253e-05
																						Mean1231	32.129	0.47958	0.000880579	1.92843e-05	34.7334	0.48781	0.4554	0.46016	0.02306	1.60387e-05
																						Mean1232	30.7944	0.37941	0.000600005	1.19304e-05	32.329	0.39083	0.34539	0.349	0.02308	1.6047e-05
																						Mean1233	19.4431	0.37447	0.000406276	1.34841e-05	19.8289	0.40179	0.19692	0.19897	0.02309	1.60564e-05
																						Mean1234	6.85311	0.29657	0.000390687	3.29478e-05	9.07179	0.31547	0.24278	0.24531	0.02312	1.60793e-05
																						Mean1235	14.4149	0.29586	0.000389019	1.55998e-05	14.7995	0.31486	0.249	0.2516	0.02314	1.60902e-05
																						Mean1236	30.5029	0.35511	0.000535944	1.04634e-05	33.2129	0.36802	0.34398	0.34758	0.02315	1.60974e-05
																						Mean1237	39.9253	0.47719	0.000873634	1.5344e-05	42.5736	0.48546	0.48929	0.4944	0.02316	1.61081e-05
																						Mean1238	23.2924	0.64848	0.000449094	1.60583e-05	23.7262	0.68604	0.29613	0.29922	0.02318	1.61193e-05
																						Mean1240	23.4472	0.32908	0.000342272	9.43071e-06	23.5176	0.3625	0.80202	0.8104	--	--
																						Mean1241	23.7798	0.23298	0.000219108	6.46645e-06	25.1565	0.25343	1.69281	1.71051	--	--
																						Mean1242	29.8018	0.30771	0.000312045	6.86026e-06	29.4858	0.34475	1.31954	1.33333	--	--
																						Mean1243	18.6801	0.38222	0.000417167	1.44482e-05	19.1315	0.4087	0.36437	0.36818	0.02319	1.61293e-05
																						Mean1244	24.864	0.74263	0.000418192	1.53447e-05	25.2151	0.78949	0.25049	0.25311	0.02321	1.614e-05
																						Mean1245	19.628	0.6889	0.000472561	2.04729e-05	20.1709	0.72435	0.19636	0.19841	0.02323	1.61542e-05
																						Mean1246	6.85354	0.32611	0.000338083	3.19112e-05	9.12143	0.36001	0.16532	0.16705	0.02326	1.61764e-05
																						Mean1247	17.7706	0.39694	0.000437849	1.60445e-05	18.1861	0.422	0.29457	0.29765	0.02328	1.61876e-05
																						Mean1248	23.067	0.46554	0.000406463	1.2713e-05	23.3721	0.50084	0.39768	0.40184	0.02329	1.61964e-05
																						Mean1249	12.6826	0.37964	0.000600619	2.9006e-05	15.4773	0.39105	0.31492	0.31821	0.02332	1.62166e-05
																						Mean1250	7.60675	0.33993	0.000357576	3.02688e-05	9.85786	0.37169	0.17296	0.17476	0.02335	1.62376e-05
																						Mean1251	46.3266	0.4155	0.000463786	6.58905e-06	47.0947	0.439	0.57497	0.58098	0.02336	1.62422e-05
																						Mean1255	40.7682	0.23728	0.000245617	3.95563e-06	39.9352	0.26288	0.88273	0.89196	0.02336	1.6245e-05
																						Mean1256	12.9604	0.49781	0.000933655	5.20061e-05	15.0158	0.50572	0.22386	0.2262	0.02341	1.62811e-05
																						Mean1257	22.4231	0.36216	0.000388922	1.11627e-05	22.7007	0.39092	0.41535	0.41969	0.02342	1.62889e-05
																						Mean1258	25.42	0.42814	0.00073371	1.88739e-05	28.0526	0.4376	0.46179	0.46662	0.02344	1.6302e-05
																						Mean1259	24.2224	0.32024	0.000329786	8.83541e-06	24.0863	0.3551	0.87071	0.87981	0.02345	1.63082e-05
																						Mean1260	20.4521	0.37816	0.000411469	1.29976e-05	20.8137	0.40508	0.44882	0.45352	0.02346	1.63172e-05
																						Mean1261	33.864	1.20185	0.000435075	1.51201e-05	34.3019	1.2565	0.25477	0.25743	0.02348	1.63277e-05
																						Mean1262	14.6192	0.41932	0.000469101	2.11716e-05	15.1709	0.44252	0.20545	0.2076	0.0235	1.63424e-05
																						Mean1263	10.718	0.41413	0.000694645	4.15558e-05	12.4665	0.42405	0.26045	0.26317	0.02354	1.63713e-05
																						Mean1264	13.5559	0.46828	0.000847906	4.33087e-05	15.754	0.47673	0.27251	0.27536	0.02359	1.64015e-05
																						Mean1265	12.251	0.33149	0.000475673	2.26536e-05	14.2776	0.34633	0.2538	0.25646	0.02361	1.64172e-05
																						Mean1266	16.8796	0.43025	0.000484284	1.90731e-05	17.4178	0.45267	0.25386	0.25651	0.02363	1.64305e-05
																						Mean1267	6.71376	0.3065	0.000414348	3.56448e-05	9.33525	0.32408	0.15922	0.16089	0.02366	1.64553e-05
																						Mean1269	21.3037	0.34079	0.000358795	1.08429e-05	21.5754	0.37242	0.42502	0.42946	0.02367	1.64628e-05
																						Mean1270	16.4121	0.40986	0.000455922	1.82199e-05	16.998	0.43381	0.16094	0.16262	0.02369	1.64755e-05
																						Mean1271	17.7734	0.43045	0.00074018	2.7321e-05	19.7326	0.43983	0.21118	0.21339	0.02372	1.64945e-05
																						Mean1272	8.38344	0.30423	0.0004089	2.81668e-05	10.8352	0.3221	0.26479	0.26756	0.02375	1.65141e-05
																						Mean1273	15.5264	1.2162	0.00059268	4.30307e-05	16.1317	1.24816	0.05564	0.05623	0.02379	1.6544e-05
																						Mean1275	19.6952	0.35125	0.00052595	1.58414e-05	21.3898	0.36444	0.37673	0.38067	0.02381	1.6555e-05
																						Mean1277	19.3736	3.30322	0.000586851	6.25424e-05	20.9189	3.34765	0.05369	0.05425	0.02387	1.65985e-05
																						Mean1278	9.49157	0.32787	0.000340564	2.31925e-05	11.6119	0.36148	0.21431	0.21654	0.02389	1.66146e-05
																						Mean1279	17.3073	0.40152	0.000659883	2.40275e-05	19.3892	0.41192	0.30385	0.30702	0.02392	1.66313e-05
																						Mean1280	36.2948	0.63517	0.000369031	8.94284e-06	36.3404	0.69024	0.62842	0.63498	0.02392	1.66375e-05
																						Mean1282	14.4624	0.44785	0.000789406	3.67071e-05	15.7381	0.45677	0.14094	0.14241	0.02396	1.66631e-05
																						Mean1283	19.8847	0.53119	0.00103	3.92264e-05	20.989	0.53863	0.07152	0.07227	0.024	1.66903e-05
																						Mean1285	38.9542	0.27999	0.000351974	5.27044e-06	40.8426	0.30136	0.4378	0.44237	0.02401	1.6694e-05
																						Mean1286	46.499	0.32892	0.000469246	5.87797e-06	47.3656	0.34401	2.25263	2.27618	--	--
																						Mean1287	30.1311	0.24683	0.000273726	5.67225e-06	29.3288	0.27298	1.65734	1.67466	--	--
																						Mean1288	17.4495	0.35587	0.000380061	1.4009e-05	17.7252	0.38542	0.37227	0.37616	--	--
																						Mean1289	21.4256	0.68339	0.000335903	1.50233e-05	21.5069	0.75388	0.19789	0.19996	0.02402	1.67045e-05
																						Mean1292	19.3313	0.4191	0.000468794	1.59981e-05	19.899	0.44232	0.33	0.33345	0.02404	1.67156e-05
																						Mean1293	20.5736	0.45796	0.000818269	2.71361e-05	23.0474	0.46663	0.41461	0.41895	0.02406	1.67345e-05
																						Mean1294	13.1543	0.41485	0.000462878	2.31501e-05	13.5771	0.4384	0.13752	0.13896	0.02409	1.67506e-05
																						Mean1296	23.4405	0.5624	0.000333411	1.23394e-05	23.4455	0.62554	0.37462	0.37853	0.0241	1.67591e-05
																						Mean1298	35.6255	0.39187	0.000633575	1.10644e-05	37.8567	0.40268	0.47951	0.48452	0.02411	1.67668e-05
																						Mean1300	38.5703	0.25129	0.000220077	4.30589e-06	36.0205	0.29417	3.34316	3.37811	--	--
																						Mean1302	16.5477	0.34645	0.0005136	1.8328e-05	19.297	0.36	0.42634	0.4308	0.02413	1.67796e-05
																						Mean1303	25.9691	0.63338	0.000368174	1.24637e-05	26.1481	0.68862	0.46023	0.46504	0.02414	1.67882e-05
																						Mean1304	7.62534e-07	1224970000000000	-1.67666e-13	269346000	32.0995	0.11877	422.493	426.909	--	--
																						Mean1305	23.7169	0.27361	0.00033725	8.35179e-06	23.7175	0.296	1.12088	1.13259	--	--
																						Mean1306	12.7544	0.37672	0.000592825	2.8366e-05	13.5828	0.38829	0.10372	0.1048	0.02417	1.6808e-05
																						Mean1307	21.3867	0.34454	0.000364082	1.09536e-05	21.5344	0.37563	0.59357	0.59978	0.02418	1.68156e-05
																						Mean1308	21.5462	0.26449	0.000247342	8.13607e-06	20.8548	0.30861	0.73129	0.73893	0.02419	1.68212e-05
																						Mean1309	14.1567	0.3283	0.000467704	1.92359e-05	15.0334	0.34345	0.26363	0.26639	0.02421	1.68346e-05
																						Mean1310	30.8523	0.49197	0.000916613	2.1273e-05	34.2379	0.49998	0.55244	0.55822	0.02423	1.68494e-05
																						Mean1311	30.1008	0.44002	0.000497796	1.10739e-05	31.9613	0.46181	0.71682	0.72432	0.02424	1.68571e-05
																						Mean1312	46.9646	0.35389	0.000532779	6.7473e-06	49.0325	0.36689	0.95398	0.96395	0.02425	1.68618e-05
																						Mean1313	19.4717	0.44949	0.000794062	2.74887e-05	22.2667	0.45836	0.37525	0.37917	0.02427	1.68809e-05
																						Mean1314	18.9278	0.40336	0.00044684	1.54254e-05	19.4042	0.42785	0.28463	0.2876	0.02429	1.68917e-05
																						Mean1315	12.7834	0.44304	0.000501955	2.63542e-05	13.3751	0.46464	0.15241	0.15401	0.02432	1.691e-05
																						Mean1316	9.11426	0.39076	0.000429167	3.05718e-05	11.3219	0.41639	0.17925	0.18113	0.02435	1.69312e-05
																						Mean1317	12.5315	0.49453	0.000571945	3.20004e-05	13.2829	0.51356	0.10661	0.10773	0.02438	1.69535e-05
																						Mean1318	22.8464	0.38723	0.000621012	1.68093e-05	25.174	0.39826	0.28222	0.28517	0.0244	1.69652e-05
																						Mean1319	28.3845	0.40094	0.000658302	1.46042e-05	31.1691	0.41136	0.4381	0.44268	0.02441	1.69753e-05
																						Mean1320	14.6174	0.33075	0.000473833	1.89035e-05	15.1905	0.34567	0.21087	0.21307	0.02443	1.69885e-05
																						Mean1321	32.4123	0.37402	0.000320853	7.08938e-06	32.0798	0.42115	1.17016	1.18239	--	--
																						Mean1322	22.2542	0.33901	0.000356287	1.03109e-05	22.287	0.37091	0.60423	0.61055	0.02444	1.69957e-05
																						Mean1323	15.5223	0.35521	0.000379136	1.57095e-05	15.8034	0.38485	0.26553	0.26831	0.02446	1.70066e-05
																						Mean1324	14.4031	0.40266	0.000663002	2.90535e-05	16.0361	0.41301	0.2095	0.21169	0.02448	1.70268e-05
																						Mean1325	34.4257	0.4339	0.000749892	1.43606e-05	35.8208	0.44319	0.45483	0.45959	0.0245	1.70368e-05
																						Mean1326	14.2105	0.35395	0.000532933	2.23072e-05	14.6321	0.36694	0.13356	0.13495	0.02452	1.70523e-05
																						Mean1327	6.79781	0.38625	0.000422843	4.03069e-05	8.86035	0.41233	0.21583	0.21809	0.02456	1.70803e-05
																						Mean1328	13.4575	0.47514	0.000545825	2.79531e-05	13.9108	0.49501	0.09189	0.09285	0.02459	1.70997e-05
																						Mean1329	14.8009	0.4939	0.000571107	2.7039e-05	15.4209	0.51296	0.11975	0.12101	0.02462	1.71186e-05
																						Mean1330	11.6692	0.35149	0.000526571	2.67751e-05	12.1433	0.36466	0.08782	0.08874	0.02464	1.71372e-05
																						Mean1331	12.6227	0.48731	0.000562259	3.10297e-05	13.0606	0.50664	0.07553	0.07632	0.02467	1.71588e-05
																						Mean1333	20.8082	0.30861	0.000419425	1.16446e-05	21.1472	0.32593	0.38748	0.39153	0.02469	1.71668e-05
																						Mean1334	12.9214	0.35051	0.000524039	2.40408e-05	15.6669	0.36375	0.56701	0.57294	0.02471	1.71836e-05
																						Mean1335	16.3652	0.4438	0.000777902	3.17822e-05	18.6189	0.45282	0.38702	0.39106	0.02474	1.72057e-05
																						Mean1336	24.0629	0.31526	0.000435547	1.04733e-05	24.378	0.33179	0.62419	0.63072	0.02475	1.7213e-05
																						Mean1337	14.2149	0.42033	0.000711875	3.2389e-05	15.3314	0.43004	0.13627	0.1377	0.02478	1.72355e-05
																						Mean1338	9.66141	0.33022	0.000472488	2.85091e-05	11.7398	0.34518	0.22434	0.22669	0.02481	1.72553e-05
																						Mean1339	9.24093	0.35992	0.00038577	2.68593e-05	9.7366	0.38896	0.07384	0.07461	0.02484	1.7274e-05
																						Mean1342	20.9004	1.20221	0.000588302	3.15376e-05	21.6021	1.23439	0.09821	0.09923	0.02487	1.72959e-05
																						Mean1343	8.76336	0.30688	0.000310872	2.32603e-05	11.3945	0.34408	0.34857	0.35222	0.02489	1.73121e-05
																						Mean1344	8.7483	0.32675	0.000463847	3.08425e-05	9.26233	0.34205	0.0777	0.07851	0.02493	1.73335e-05
																						Mean1346	29.0694	0.35674	0.00038129	8.43682e-06	29.2763	0.38618	0.67301	0.68005	0.02493	1.73394e-05
																						Mean1347	16.8438	0.38227	0.000417241	1.60264e-05	17.2482	0.40875	0.31068	0.31392	0.02495	1.73505e-05
																						Mean1348	22.9707	0.34981	0.000371524	1.04023e-05	23.2237	0.38017	0.64506	0.6518	0.02496	1.73578e-05
																						Mean1349	21.0038	0.35549	0.000379531	1.16219e-05	21.1762	0.3851	0.44438	0.44902	0.02497	1.73659e-05
																						Mean1350	15.7978	0.35845	0.000383704	1.56249e-05	16.048	0.38768	0.29161	0.29466	0.02499	1.73767e-05
																						Mean1351	42.6825	0.40848	0.000679014	1.01209e-05	44.0738	0.4186	0.3714	0.37528	0.025	1.73838e-05
																						Mean1352	14.4828	0.46207	0.000528054	2.48499e-05	15.1565	0.48259	0.13521	0.13663	0.02502	1.7401e-05
																						Mean1356	56.5274	0.43559	0.000491673	5.80491e-06	57.5667	0.45766	0.68425	0.6914	0.02503	1.74051e-05
																						Mean1357	8.64361	0.39801	0.000439342	3.31169e-05	10.6147	0.42297	0.15228	0.15387	0.02506	1.74281e-05
																						Mean1359	11.5266	0.4491	0.000792943	4.6345e-05	13.7107	0.45798	0.39879	0.40296	0.02511	1.74603e-05
																						Mean1360	23.425	0.38275	0.000608946	1.59839e-05	25.9381	0.394	0.48614	0.49122	0.02512	1.74715e-05
																						Mean1361	11.4708	0.39216	0.000431138	2.44184e-05	13.6709	0.41766	0.28629	0.28929	0.02515	1.74884e-05
																						Mean1362	23.9542	0.35835	0.000383564	1.03008e-05	24.1633	0.38759	0.55976	0.56562	0.02516	1.74956e-05
																						Mean1363	22.8415	0.55727	0.000654327	2.12891e-05	24.5866	0.57426	0.26081	0.26354	0.02518	1.75104e-05
																						Mean1364	10.1894	0.41089	0.000457355	2.94573e-05	12.1846	0.43475	0.22268	0.225	0.02521	1.75309e-05
																						Mean1365	16.3077	0.45375	0.00051668	2.14463e-05	16.9526	0.47473	0.21742	0.21969	0.02523	1.75458e-05
																						Mean1367	15.6431	0.34654	0.000366902	1.50881e-05	15.9568	0.37735	0.32071	0.32406	0.02525	1.75563e-05
																						Mean1370	19.1075	0.37557	0.000407819	1.37775e-05	19.4693	0.40277	0.42213	0.42654	0.02526	1.75659e-05
																						Mean1371	5.36085	0.33526	0.000351	4.22083e-05	6.86647	0.36772	0.12904	0.13039	0.0253	1.75952e-05
																						Mean1372	33.3155	0.30523	0.000308523	6.08203e-06	32.8117	0.34272	1.61714	1.63404	--	--
																						Mean1373	25.5603	0.4232	0.000367361	1.02528e-05	25.7596	0.46311	0.66771	0.67469	0.02531	1.76024e-05
																						Mean1376	11.8355	0.47692	0.000548241	3.19742e-05	12.3501	0.49672	0.08218	0.08304	0.02534	1.76246e-05
																						Mean1378	23.4987	0.35258	0.000375423	1.02748e-05	23.6416	0.38257	0.79079	0.79905	0.02535	1.76317e-05
																						Mean1379	11.381	0.49705	0.000575317	3.55239e-05	12.0624	0.51598	0.09086	0.09181	0.02539	1.76564e-05
																						Mean1380	12.3559	0.36348	0.000557771	2.7125e-05	13.0252	0.37582	0.13689	0.13832	0.02542	1.76753e-05
																						Mean1381	17.3279	0.43252	0.000746008	2.83271e-05	20.0057	0.44184	0.44259	0.44722	0.02545	1.7695e-05
																						Mean1383	15.6959	0.42777	0.000480845	2.033e-05	16.2608	0.45037	0.24882	0.25142	0.02547	1.77091e-05
																						Mean1384	12.379	0.34859	0.000519077	2.48107e-05	13.0501	0.36197	0.10088	0.10193	0.02549	1.77264e-05
																						Mean1385	13.3846	0.36824	0.000397501	1.91341e-05	13.8559	0.39627	0.0942	0.09519	0.02551	1.77397e-05
																						Mean1386	16.2582	0.36074	0.000386923	1.53135e-05	16.5404	0.38967	0.32302	0.3264	0.02553	1.77504e-05
																						Mean1387	30.4249	0.25234	0.000287528	5.79189e-06	29.7524	0.27796	1.68578	1.7034	--	--
																						Mean1388	33.4701	0.28806	0.00028382	5.69396e-06	33.0204	0.32867	1.44293	1.45801	--	--
																						Mean1389	16.1254	0.32452	0.000335829	1.34829e-05	16.2688	0.35867	0.3258	0.3292	0.02554	1.77597e-05
																						Mean1391	13.4228	0.3192	0.000445196	1.92197e-05	15.2178	0.33529	0.16404	0.16575	0.02556	1.77731e-05
																						Mean1392	13.6769	0.29696	0.000391609	1.65468e-05	13.9196	0.3158	0.28133	0.28427	0.02557	1.77846e-05
																						Mean1396	20.1631	0.37722	0.000410146	1.31374e-05	20.4333	0.40424	0.45713	0.46191	--	--
																						Mean1397	22.7069	0.38359	0.000419102	1.19473e-05	22.9744	0.40994	0.35569	0.35941	0.02559	1.77929e-05
																						Mean1399	21.7132	0.30813	0.000418283	1.11281e-05	21.7865	0.32551	0.55428	0.56007	0.0256	1.78006e-05
																						Mean1400	30.0829	0.25722	0.000233976	5.66858e-06	28.5733	0.30147	1.49542	1.51105	--	--
																						Mean1403	19.5111	0.44752	0.000508126	1.75406e-05	20.1305	0.46885	0.24153	0.24405	0.02561	1.78128e-05
																						Mean1404	13.6195	0.47398	0.000864362	4.43009e-05	15.2901	0.48231	0.22111	0.22342	0.02566	1.78437e-05
																						Mean1405	17.2576	0.44936	0.000793684	3.09949e-05	20.1901	0.45823	0.48941	0.49453	0.02569	1.78652e-05
																						Mean1406	30.9255	0.46701	0.000844264	1.88684e-05	33.2593	0.47549	0.46739	0.47227	0.02571	1.78783e-05
																						Mean1407	15.0339	0.4513	0.000513308	2.30657e-05	17.5551	0.47241	0.3831	0.38711	0.02573	1.78944e-05
																						Mean1408	24.2947	0.37869	0.000412203	1.09632e-05	24.5516	0.40555	0.51687	0.52227	0.02574	1.7902e-05
																						Mean1409	16.0337	0.94326	0.000603582	3.68505e-05	16.8423	0.97103	0.08154	0.08239	0.02578	1.79276e-05
																						Mean1411	8.85948	0.48819	0.000905603	7.28031e-05	10.6804	0.49627	0.19053	0.19252	0.02585	1.79782e-05
																						Mean1412	6.54538	0.67486	0.000799573	0.00010113	7.62961	0.68968	0.08984	0.09078	0.02595	1.80486e-05
																						Mean1413	21.7637	0.38789	0.00062281	1.77118e-05	23.2931	0.39889	0.23449	0.23695	0.02597	1.80609e-05
																						Mean1416	22.4155	0.3199	0.000329307	9.53576e-06	22.4343	0.35482	0.8576	0.86657	0.02598	1.80675e-05
																						Mean1417	20.0537	3.91319	0.000799875	9.12633e-05	20.6696	3.9426	0.03351	0.03386	0.02607	1.8131e-05
																						Mean1418	16.0079	0.35807	0.000543636	2.02866e-05	19.2446	0.37077	0.50859	0.5139	0.02609	1.81451e-05
																						Mean1422	21.7708	0.49769	0.000435435	1.46387e-05	22.1694	0.53026	0.33062	0.33408	0.02611	1.81553e-05
																						Mean1424	21.9496	0.26878	0.000326116	8.78523e-06	21.8696	0.29196	0.615	0.62142	0.02612	1.81614e-05
																						Mean1425	16.6266	0.28249	0.000357762	1.25242e-05	16.8361	0.30347	0.42058	0.42497	0.02613	1.81701e-05
																						Mean1426	17.4868	0.34936	0.000370887	1.36413e-05	17.6676	0.37978	0.46338	0.46822	0.02614	1.81796e-05
																						Mean1428	35.2637	0.39535	0.000643039	1.1397e-05	36.6029	0.40601	0.65306	0.65989	0.02615	1.81875e-05
																						Mean1430	38.0323	0.31529	0.000435624	6.62765e-06	39.4419	0.33182	0.83005	0.83873	0.02616	1.81921e-05
																						Mean1433	19.9814	0.28134	0.000355103	1.03538e-05	20.087	0.3025	0.64619	0.65294	0.02617	1.81993e-05
																						Mean1434	17.1276	0.30857	0.000419336	1.41439e-05	17.4701	0.3259	0.46128	0.4661	0.02618	1.82092e-05
																						Mean1435	21.2101	0.35943	0.000385079	1.16806e-05	21.4354	0.38853	0.41989	0.42428	0.0262	1.82173e-05
																						Mean1437	35.9611	0.43679	0.000758041	1.3954e-05	38.8739	0.44599	0.45698	0.46175	0.02621	1.8227e-05
																						Mean1438	21.8306	0.27217	0.000333944	9.00115e-06	21.7471	0.2948	0.7765	0.78462	0.02622	1.82332e-05
																						Mean1439	9.52179	0.32729	0.000465195	2.84285e-05	11.6706	0.34254	0.36585	0.36967	0.02625	1.8253e-05
																						Mean1440	10.5256	0.34324	0.000505373	2.82711e-05	12.928	0.35705	0.31588	0.31918	0.02628	1.82727e-05
																						Mean1442	23.7274	0.93259	0.000495512	2.07101e-05	24.3167	0.97096	0.2033	0.20543	0.0263	1.82871e-05
																						Mean1443	18.3648	0.3131	0.000430299	1.35487e-05	18.7697	0.32988	0.57025	0.57621	0.02631	1.82965e-05
																						Mean1444	12.5649	0.37366	0.000584658	2.82918e-05	14.5388	0.38539	0.20992	0.21212	0.02634	1.83162e-05
																						Mean1445	35.629	0.43642	0.000756997	1.40573e-05	37.3891	0.44563	0.49015	0.49527	0.02635	1.83259e-05
																						Mean1446	42.9937	0.71989	0.000852121	1.70603e-05	45.2089	0.73418	0.42984	0.43434	0.02637	1.83378e-05
																						Mean1447	34.0674	0.33557	0.000351427	6.64939e-06	35.7657	0.36798	0.33537	0.33888	0.02638	1.83424e-05
																						Mean1448	11.3785	0.37246	0.000581475	3.1027e-05	13.7588	0.38426	0.30038	0.30351	0.02641	1.8364e-05
																						Mean1449	35.4354	0.3251	0.000336648	6.14877e-06	36.9855	0.35916	0.57182	0.57779	0.02641	1.83683e-05
																						Mean1450	17.7794	0.39062	0.00042898	1.56642e-05	18.1224	0.41627	0.30445	0.30763	0.02643	1.83792e-05
																						Mean1451	29.4233	0.26026	0.000239841	5.86489e-06	28.0338	0.30459	1.59632	1.61301	--	--
																						Mean1452	21.5024	0.34958	0.000371186	1.11026e-05	21.6281	0.37997	0.72033	0.72786	--	--
																						Mean1453	27.7141	0.25219	0.000178044	5.26812e-06	24.741	0.23898	2.20243	2.22545	--	--
																						Mean1454	19.8699	0.50241	0.00043963	1.62328e-05	20.2457	0.53463	0.25335	0.256	0.02645	1.83905e-05
																						Mean1456	23.3427	0.45736	0.000521624	1.51708e-05	24.2771	0.47814	0.82483	0.83345	--	--
																						Mean1457	18.9391	0.27767	0.000346617	1.06995e-05	19.0186	0.29941	0.6931	0.70035	--	--
																						Mean1458	18.6537	0.40205	0.000444993	1.55761e-05	19.0403	0.42665	0.3237	0.32708	0.02646	1.84013e-05
																						Mean1459	19.0404	0.44855	0.00050954	1.80389e-05	19.6463	0.46982	0.27682	0.27971	0.02648	1.84138e-05
																						Mean1460	9.95373	0.36502	0.000561815	3.3974e-05	12.4669	0.37727	0.41179	0.41609	0.02651	1.84375e-05
																						Mean1461	11.0282	0.34843	0.000369573	2.15546e-05	13.0473	0.37898	0.2181	0.22038	0.02653	1.84525e-05
																						Mean1462	27.6135	0.31574	0.000436717	9.15259e-06	27.9429	0.33221	0.50486	0.51014	0.02654	1.84588e-05
																						Mean1463	10.1283	0.44835	0.000790805	5.25447e-05	11.5677	0.45724	0.19524	0.19728	0.0266	1.84954e-05
																						Mean1464	24.6654	0.33466	0.00035014	9.15285e-06	24.7423	0.36721	0.94343	0.95329	--	--
																						Mean1465	12.948	0.46214	0.000528151	2.78023e-05	13.44	0.48266	0.10774	0.10887	0.02662	1.85147e-05
																						Mean1467	36.8829	0.39575	0.000644115	1.09207e-05	39.7211	0.40639	0.56444	0.57034	0.02664	1.85223e-05
																						Mean1468	27.9399	0.27991	0.000351797	7.34496e-06	28.0042	0.3013	1.22049	1.23325	--	--
																						Mean1469	16.6189	0.3095	0.000421584	1.46571e-05	17.1035	0.32671	0.26693	0.26972	0.02665	1.85325e-05
																						Mean1470	27.7755	0.38458	0.000613879	1.36212e-05	30.2204	0.39574	0.50865	0.51396	0.02666	1.8542e-05
																						Mean1471	11.6277	0.37721	0.00059411	3.12004e-05	12.4569	0.38875	0.08682	0.08773	0.02669	1.85636e-05
																						Mean1472	18.8338	0.41662	0.000701559	2.3967e-05	20.7168	0.42645	0.26544	0.26821	0.02672	1.85803e-05
																						Mean1473	14.2764	0.4578	0.000817801	3.90743e-05	16.1263	0.46647	0.24932	0.25193	0.02676	1.86075e-05
																						Mean1474	14.8821	0.38438	0.000420214	1.82831e-05	15.2422	0.41065	0.21988	0.22218	0.02678	1.86202e-05
																						Mean1475	22.5275	0.26274	0.000312141	8.27997e-06	22.2911	0.28688	0.90551	0.91498	--	--
																						Mean1476	11.318	0.54565	0.000639316	4.15233e-05	11.9774	0.56295	0.07914	0.07997	0.02682	1.86491e-05
																						Mean1477	12.6061	0.50598	0.00058723	3.30033e-05	13.3516	0.52457	0.08931	0.09025	0.02685	1.8672e-05
																						Mean1479	59.6122	0.39228	0.000634692	6.62752e-06	60.6214	0.40308	1.56477	1.58113	0.02686	1.86766e-05
																						Mean1481	14.528	0.42335	0.000474704	2.16174e-05	14.999	0.44626	0.2066	0.20876	0.02688	1.86917e-05
																						Mean1482	10.8665	0.44424	0.000503605	3.1134e-05	11.5738	0.46576	0.06274	0.06339	0.02691	1.87133e-05
																						Mean1483	27.5094	0.31279	0.000319253	7.57044e-06	27.2089	0.34894	1.35791	1.3721	--	--
																						Mean1484	14.6713	0.37351	0.000584263	2.42091e-05	16.7749	0.38525	0.30593	0.30913	0.02693	1.87302e-05
																						Mean1485	23.523	0.23821	0.000248855	6.89926e-06	22.4597	0.26403	1.31781	1.33159	--	--
																						Mean1486	23.7125	0.28917	0.000373293	9.12308e-06	23.7627	0.30913	0.81392	0.82243	--	--
																						Mean1487	11.9969	0.42399	0.000475602	2.62392e-05	12.6299	0.44686	0.15737	0.15902	0.02696	1.87484e-05
																						Mean1489	12.2105	0.3726	0.000581837	2.89356e-05	14.5315	0.38439	0.32885	0.33229	0.02699	1.87685e-05
																						Mean1490	18.2726	0.29085	0.000377242	1.19547e-05	18.47	0.31057	0.51748	0.52289	0.027	1.87768e-05
																						Mean1491	15.9682	0.4825	0.000555768	2.41422e-05	16.5335	0.50203	0.16053	0.16221	0.02703	1.87936e-05
																						Mean1492	18.451	0.37986	0.000413851	1.44989e-05	18.7947	0.40659	0.33182	0.33528	0.02704	1.88037e-05
																						Mean1493	28.3863	0.53841	0.00105	2.83231e-05	30.656	0.54577	0.40547	0.40971	0.02707	1.88234e-05
																						Mean1494	5.75486	0.30175	0.000303556	3.47704e-05	7.25293	0.33987	0.17568	0.17752	0.0271	1.88476e-05
																						Mean1495	26.745	0.33327	0.000348179	8.39755e-06	26.7339	0.36603	0.98989	1.00024	--	--
																						Mean1496	35.409	0.40203	0.000661271	1.1777e-05	37.0614	0.4124	0.38689	0.39094	0.02711	1.88558e-05
																						Mean1498	25.6621	0.4643	0.00083646	2.24412e-05	27.9936	0.47283	0.39463	0.39875	0.02714	1.88714e-05
																						Mean1501	15.4506	0.36542	0.00039352	1.64003e-05	15.6872	0.39378	0.27725	0.28015	0.02715	1.88828e-05
																						Mean1502	20.3594	0.39929	0.000441137	1.41266e-05	20.856	0.42414	0.45767	0.46245	0.02717	1.88926e-05
																						Mean1504	18.8079	0.41856	0.000468054	1.64116e-05	19.2813	0.44183	0.36672	0.37055	0.02718	1.8904e-05
																						Mean1505	8.56661	0.38536	0.000615969	4.43583e-05	10.0439	0.39648	0.15815	0.1598	0.02723	1.89349e-05
																						Mean1506	23.9027	0.37776	0.000410895	1.11042e-05	24.2428	0.40472	0.70586	0.71323	0.02724	1.89426e-05
																						Mean1507	24.126	0.274	0.000338155	8.22817e-06	24.0466	0.29633	1.00374	1.01423	--	--
																						Mean1508	19.7363	0.36764	0.000396651	1.29469e-05	19.9633	0.39574	0.44902	0.45371	0.02725	1.89516e-05
																						Mean1509	21.8081	0.39284	0.000432089	1.28762e-05	22.1588	0.41828	0.5157	0.52109	0.02727	1.89606e-05
																						Mean1510	20.2753	0.28735	0.000369056	1.05591e-05	20.4174	0.30759	0.49563	0.50081	0.02728	1.89679e-05
																						Mean1512	18.2661	0.29149	0.00037873	1.20029e-05	18.3566	0.31111	0.42265	0.42706	0.02729	1.89762e-05
																						Mean1513	28.6801	0.24829	0.000277468	6.00816e-06	27.9374	0.27432	1.7468	1.76506	--	--
																						Mean1514	16.1454	0.41372	0.000693492	2.75247e-05	18.3509	0.42365	0.36854	0.37239	0.02732	1.89954e-05
																						Mean1516	18.1384	0.38041	0.000414626	1.47793e-05	18.4499	0.40709	0.36302	0.36682	0.02733	1.90057e-05
																						Mean1517	14.7901	0.43564	0.000491748	2.21905e-05	15.3018	0.45771	0.22371	0.22605	0.02735	1.90211e-05
																						Mean1518	21.4071	0.32388	0.00033494	1.01327e-05	21.3248	0.35815	0.58705	0.59318	--	--
																						Mean1519	20.3775	0.26112	0.000308382	9.07301e-06	20.1681	0.28551	0.89171	0.90103	--	--
																						Mean1520	19.9318	0.27459	0.000339499	9.99213e-06	19.9791	0.29682	0.59097	0.59715	0.02736	1.9028e-05
																						Mean1522	15.2629	0.35892	0.000384361	1.62009e-05	15.5459	0.38808	0.3094	0.31263	0.02738	1.90393e-05
																						Mean1523	8.51648	0.48785	0.000903259	8.33792e-05	11.9894	0.50549	0.06836	0.06907	0.02746	1.90973e-05
																						Mean1524	39.5862	0.52971	0.000618548	1.13161e-05	41.9858	0.54748	0.55407	0.55986	0.02747	1.91052e-05
																						Mean1525	18.3048	0.36503	0.000392971	1.38228e-05	18.6248	0.39344	0.41288	0.4172	--	--
																						Mean1526	7.45548	0.31921	0.000328337	2.85978e-05	9.47386	0.35425	0.22751	0.22989	0.0275	1.9125e-05
																						Mean1527	20.2034	0.28512	0.000363877	1.04627e-05	20.3359	0.3057	0.60189	0.60818	--	--
																						Mean1528	11.3043	0.46936	0.000537975	3.26358e-05	11.8326	0.48951	0.10657	0.10768	0.02753	1.91477e-05
																						Mean1529	26.1526	0.53649	0.00105	3.04968e-05	27.8987	0.54387	0.27207	0.27491	0.02756	1.91689e-05
																						Mean1530	11.79	0.41946	0.000469295	2.62652e-05	12.2327	0.44265	0.15345	0.15505	0.02759	1.91872e-05
																						Mean1531	17.3995	0.37706	0.000409919	1.52149e-05	17.7043	0.4041	0.29055	0.29359	0.02761	1.91978e-05
																						Mean1532	18.0238	0.37978	0.000413743	1.48383e-05	18.3376	0.40653	0.40087	0.40506	0.02762	1.92081e-05
																						Mean1534	28.5168	0.35747	0.000542063	1.13477e-05	28.9187	0.37021	0.38678	0.39082	0.02763	1.9216e-05
																						Mean1535	20.2941	0.42713	0.000479964	1.56878e-05	20.7558	0.44977	0.29265	0.29571	0.02765	1.92269e-05
																						Mean1536	13.7116	0.43321	0.000488384	2.37296e-05	14.2018	0.45544	0.12154	0.12281	0.02767	1.92434e-05
																						Mean1537	17.5344	0.39267	0.000431849	1.60044e-05	18.4621	0.41812	0.32565	0.32905	0.02769	1.92545e-05
																						Mean1538	23.2088	0.51782	0.000992418	3.17384e-05	24.5493	0.52544	0.18634	0.18828	0.02772	1.92766e-05
																						Mean1539	16.4604	0.50741	0.000961774	4.27492e-05	17.4012	0.51517	0.11187	0.11304	0.02776	1.93063e-05
																						Mean1541	34.7389	0.45456	0.000808542	1.5803e-05	36.5981	0.46331	0.37204	0.37593	0.02778	1.93173e-05
																						Mean1542	26.5351	0.704	0.00083376	2.66814e-05	28.4289	0.71846	0.28275	0.2857	0.02781	1.93359e-05
																						Mean1543	10.5511	0.50991	0.000592441	3.99245e-05	12.1541	0.52835	0.18473	0.18666	0.02784	1.93637e-05
																						Mean1544	16.8798	0.28476	0.000363034	1.24969e-05	17.0421	0.30539	0.43547	0.44002	0.02786	1.93723e-05
																						Mean1545	19.0144	0.37661	0.000409287	1.38992e-05	19.3965	0.4037	0.44089	0.4455	0.02787	1.9382e-05
																						Mean1546	17.062	0.38264	0.000417771	1.58438e-05	17.4226	0.40909	0.30848	0.31171	0.02789	1.9393e-05
																						Mean1547	16.1176	0.38397	0.000419638	1.68557e-05	16.4034	0.41028	0.36507	0.36888	0.0279	1.94047e-05
																						Mean1548	4.86038	0.279	0.000270405	3.79796e-05	6.43188	0.3212	0.17004	0.17182	--	--
																						Mean1549	9.81798	0.48634	0.000560952	3.9767e-05	10.3658	0.50571	0.08361	0.08448	0.02794	1.94324e-05
																						Mean1550	7.00056	0.32604	0.000462089	3.83807e-05	8.67649	0.34142	0.21312	0.21534	0.02798	1.94591e-05
																						Mean1551	34.6913	0.49029	0.000566253	1.14009e-05	36.7229	0.50949	0.37719	0.38113	0.02799	1.9467e-05
																						Mean1553	7.37168	0.33938	0.000495574	3.94554e-05	9.40719	0.35351	0.21767	0.21994	0.02803	1.94945e-05
																						Mean1556	24.4046	0.28058	0.000353327	8.44047e-06	24.4314	0.30186	0.8632	0.87222	0.02804	1.95003e-05
																						Mean1557	4.28682	0.2856	0.000280224	4.40732e-05	6.33805	0.32666	0.26369	0.26645	--	--
																						Mean1559	10.0019	0.44559	0.000505462	3.3986e-05	10.7798	0.46703	0.07684	0.07764	0.02808	1.9524e-05
																						Mean1561	20.3697	0.29969	0.000300622	9.75125e-06	20.1898	0.33819	0.67977	0.68687	0.02809	1.95307e-05
																						Mean1562	13.2886	0.49568	0.000573484	3.02901e-05	13.9238	0.51466	0.10375	0.10484	0.02812	1.95518e-05
																						Mean1563	14.1093	0.43342	0.00048868	2.30783e-05	14.6646	0.45564	0.19007	0.19205	0.02814	1.95679e-05
																						Mean1564	11.9116	0.37769	0.000595395	3.05407e-05	13.701	0.3892	0.21242	0.21464	0.02817	1.95891e-05
																						Mean1566	14.0519	0.31453	0.000433777	1.78578e-05	14.4188	0.33115	0.25953	0.26224	0.02819	1.96015e-05
																						Mean1567	32.2812	0.7767	0.00177	5.49975e-05	33.6734	0.78259	0.13558	0.13699	0.02824	1.96398e-05
																						Mean1568	2878.82	1420.98	0.00064826	5.66136e-05	2880.46	1421.18	0.13295	0.13434	--	--
																						Mean1569	15.9953	0.42227	0.000473213	1.95584e-05	16.5131	0.44526	0.25236	0.255	0.02826	1.96534e-05
																						Mean1570	15.3885	0.41734	0.000703545	2.94453e-05	17.399	0.42715	0.22925	0.23165	0.02829	1.96738e-05
																						Mean1571	6.73207	0.40888	0.000454546	4.42581e-05	8.53148	0.4329	0.10175	0.10281	0.02834	1.97046e-05
																						Mean1574	25.6394	0.43475	0.000752285	1.93667e-05	28.0905	0.44401	0.57335	0.57934	0.02835	1.97181e-05
																						Mean1575	17.8974	0.2868	0.000367774	1.19244e-05	18.1233	0.30712	0.53635	0.54195	0.02837	1.97264e-05
																						Mean1576	16.0244	0.47411	0.000544423	2.3394e-05	18.1624	0.49403	0.34236	0.34594	0.02839	1.97426e-05
																						Mean1577	30.2916	0.55858	0.000656005	1.61141e-05	32.4174	0.57554	0.42903	0.43351	0.02841	1.97538e-05
																						Mean1578	17.6954	0.3142	0.000432974	1.41532e-05	18.0999	0.33085	0.47329	0.47824	0.02842	1.97637e-05
																						Mean1579	10.1715	0.49063	0.000566716	3.89281e-05	10.8932	0.50982	0.09041	0.09135	0.02846	1.97908e-05
																						Mean1580	5.40693	0.32295	0.000333623	3.99796e-05	7.0293	0.35737	0.18471	0.18664	--	--
																						Mean1581	22.7271	0.40205	0.000661345	1.83513e-05	25.0687	0.41243	0.36989	0.37376	0.02848	1.98035e-05
																						Mean1582	17.2752	0.40513	0.000449305	1.70112e-05	17.6886	0.42947	0.26955	0.27236	0.02849	1.98154e-05
																						Mean1584	8.82902	13.7491	0.000541335	0.000346403	9.35701	13.824	0.01382	0.01396	0.02884	2.00562e-05
																						Mean1586	24.3309	0.26303	0.000312824	7.6786e-06	24.0913	0.28713	0.89616	0.90553	--	--
																						Mean1587	20.9157	0.35814	0.000383266	1.17878e-05	21.1617	0.38741	0.51253	0.51789	0.02885	2.00644e-05
																						Mean1590	25.9712	0.29418	0.000155569	5.55867e-06	22.695	0.2312	1.34085	1.35486	--	--
																						Mean1594	38.2897	0.60484	0.000714524	1.44989e-05	40.5185	0.62077	0.44996	0.45466	0.02887	2.00745e-05
																						Mean1595	25.0627	0.32391	0.000334973	8.65551e-06	24.8941	0.35816	0.77053	0.77858	--	--
																						Mean1596	10.0718	0.47012	0.000539013	3.67242e-05	10.6348	0.49024	0.07768	0.07849	0.0289	2.01001e-05
																						Mean1598	21.5832	0.25036	0.000282675	8.07626e-06	21.066	0.2762	0.88967	0.89897	--	--
																						Mean1599	19.8405	0.58895	0.0012	4.9476e-05	22.7299	0.5958	0.3323	0.33578	0.02895	2.01345e-05
																						Mean1600	26.5508	0.35934	0.000384958	9.32805e-06	26.7165	0.38845	0.71473	0.7222	0.02896	2.0141e-05
																						Mean1601	16.1117	0.44158	0.000771582	3.19184e-05	17.8802	0.45065	0.2357	0.23816	0.02899	2.01632e-05
																						Mean1602	11.4146	0.55834	0.000655698	4.27333e-05	12.82	0.5753	0.17932	0.18119	0.02904	2.01929e-05
																						Mean1603	20.0393	0.2766	0.00034414	1.00512e-05	20.0337	0.29851	0.70617	0.71355	0.02905	2.01999e-05
																						Mean1604	14.7661	0.28229	0.000357296	1.40862e-05	14.9468	0.3033	0.45843	0.46323	0.02906	2.02097e-05
																						Mean1605	14.0771	0.34851	0.000518894	2.18087e-05	15.839	0.36191	0.2379	0.24038	0.02908	2.02248e-05
																						Mean1606	9.10152	0.37532	0.00040747	2.88972e-05	11.5893	0.40255	0.37213	0.37602	0.02911	2.02449e-05
																						Mean1607	21.1535	0.33468	0.000350179	1.06735e-05	21.1816	0.36723	0.66998	0.67698	0.02912	2.02523e-05
																						Mean1609	6.92079	0.28472	0.000278918	2.72142e-05	8.88793	0.32593	0.30373	0.30691	--	--
																						Mean1610	41.2743	0.25082	0.000179227	3.54085e-06	36.7934	0.2394	4.57502	4.62284	--	--
																						Mean1611	18.5554	0.40152	0.000444256	1.56282e-05	19.1011	0.42617	0.3327	0.33617	0.02914	2.02632e-05
																						Mean1612	8.18254	0.31262	0.000319015	2.5436e-05	9.58041	0.3488	0.14953	0.15109	0.02916	2.02809e-05
																						Mean1613	5.22363	0.31715	0.000440161	4.87891e-05	6.95914	0.33346	0.17709	0.17894	0.02921	2.03148e-05
																						Mean1615	40.8886	0.45226	0.000801975	1.32735e-05	42.2206	0.46107	1.34983	1.36394	0.02923	2.03241e-05
																						Mean1616	16.392	0.35095	0.000373129	1.46396e-05	16.5214	0.38116	0.30137	0.30452	0.02924	2.03342e-05
																						Mean1617	13.2056	0.46261	0.000528793	2.73038e-05	13.7173	0.48311	0.13317	0.13456	0.02927	2.03532e-05
																						Mean1618	11.0602	0.57623	0.000678548	4.64118e-05	11.8622	0.59276	0.06397	0.06464	0.02931	2.03855e-05
																						Mean1619	11.5866	0.4786	0.000550508	3.28442e-05	12.1258	0.49831	0.08507	0.08596	0.02935	2.04083e-05
																						Mean1620	24.3995	0.3025	0.000404775	9.58032e-06	24.6486	0.3206	0.77019	0.77824	--	--
																						Mean1624	20.79	0.30159	0.000402605	1.11838e-05	21.0784	0.31981	0.67182	0.67884	0.02936	2.04161e-05
																						Mean1625	25.1874	0.26416	0.000246778	6.95152e-06	24.4915	0.30831	0.79051	0.79877	0.02937	2.0421e-05
																						Mean1626	19.2833	0.32623	0.000338246	1.13465e-05	19.2617	0.3601	0.59106	0.59724	0.02938	2.04288e-05
																						Mean1627	15.8662	0.4008	0.000443247	1.82285e-05	16.3078	0.42551	0.21928	0.22157	0.02939	2.04415e-05
																						Mean1628	17.275	0.2904	0.000376182	1.26121e-05	17.5541	0.31018	0.48032	0.48534	0.02941	2.04503e-05
																						Mean1629	18.1553	0.28441	0.000362215	1.15956e-05	18.2692	0.3051	0.53189	0.53745	0.02942	2.04584e-05
																						Mean1630	19.2935	0.40072	0.000443134	1.49859e-05	19.6795	0.42544	0.47651	0.48149	0.02943	2.04688e-05
																						Mean1631	10.7476	0.51036	0.000593052	3.92517e-05	12.5716	0.52879	0.25903	0.26174	0.02947	2.04961e-05
																						Mean1632	19.4973	0.39362	0.000638337	2.04157e-05	21.6986	0.40436	0.42769	0.43216	0.02949	2.05103e-05
																						Mean1634	20.0255	0.37185	0.000402575	1.29633e-05	20.3136	0.39946	0.47928	0.4843	0.02951	2.05193e-05
																						Mean1636	14.3837	0.40643	0.000673368	2.96997e-05	16.9607	0.41663	0.48895	0.49406	0.02954	2.05399e-05
																						Mean1637	17.5259	0.27698	0.000267336	1.0458e-05	17.1283	0.31951	0.4613	0.46613	0.02955	2.05472e-05
																						Mean1638	18.6202	0.26446	0.000316138	1.01125e-05	18.468	0.28833	0.72204	0.72958	0.02956	2.05542e-05
																						Mean1639	32.8951	0.40487	0.000129154	4.4358e-06	26.2553	0.22217	2.21486	2.23801	--	--
																						Mean1640	9.71106	0.31043	0.000423823	2.52209e-05	11.9267	0.32753	0.28649	0.28949	0.02958	2.05718e-05
																						Mean1641	10.533	0.37208	0.000402904	2.46676e-05	12.2377	0.39967	0.1886	0.19057	0.02961	2.05889e-05
																						Mean1642	1.80642	1.40568	0.000188591	0.000269894	2.18038	1.83492	0.01312	0.01326	--	--
																						Mean1643	5.00118	0.25914	0.000303749	3.65702e-05	6.51785	0.28383	0.17998	0.18187	--	--
																						Mean1645	17.0146	0.50944	0.000591824	2.47216e-05	17.7008	0.5279	0.12793	0.12927	0.02963	2.06061e-05
																						Mean1646	25.4791	0.41635	0.000700808	1.76904e-05	28.4014	0.42619	0.63191	0.63851	0.02965	2.06184e-05
																						Mean1647	26.7325	0.43776	0.000760784	1.88652e-05	28.7392	0.44694	0.36757	0.37141	0.02967	2.06315e-05
																						Mean1649	14.8911	0.4053	0.000449541	1.9747e-05	15.334	0.42962	0.23699	0.23947	0.02969	2.06453e-05
																						Mean1650	37.0307	0.43723	0.000759295	1.35819e-05	39.2226	0.44642	0.40408	0.40831	0.0297	2.06547e-05
																						Mean1651	10.2894	0.35339	0.00053147	3.07058e-05	10.8038	0.36642	0.14537	0.14689	0.02973	2.06761e-05
																						Mean1652	24.6533	0.33135	0.000345478	9.04535e-06	25.1166	0.36441	0.80103	0.8094	0.02974	2.06824e-05
																						Mean1653	8.73631	0.51083	0.000971839	8.17755e-05	10.2367	0.51854	0.13262	0.13401	0.02982	2.07392e-05
																						Mean1654	10.8109	0.42554	0.000477754	2.92808e-05	11.2169	0.44829	0.07001	0.07075	0.02985	2.07596e-05
																						Mean1655	23.5229	0.26378	0.000314564	7.97506e-06	23.2565	0.28776	0.96982	0.97996	--	--
																						Mean1656	18.1799	0.29092	0.000377401	1.20204e-05	18.2421	0.31063	0.39357	0.39769	0.02986	2.0768e-05
																						Mean1657	18.3893	0.47302	0.000542947	2.03112e-05	19.0767	0.49299	0.15465	0.15627	0.02988	2.07821e-05
																						Mean1658	23.742	0.42811	0.000371952	1.11842e-05	23.8142	0.46743	0.65814	0.66502	0.0299	2.07899e-05
																						Mean1659	29.8787	0.23329	0.000225024	5.1975e-06	28.0667	0.25553	1.99588	2.01674	--	--
																						Mean1660	25.3253	0.26693	0.000321842	7.53675e-06	25.0789	0.2904	1.33401	1.34795	--	--
																						Mean1661	10.4636	0.35083	0.000524857	2.97434e-05	10.9637	0.36405	0.13825	0.13969	0.02993	2.08105e-05
																						Mean1662	28.2642	0.23751	0.000246434	5.71468e-06	26.854	0.26317	1.86609	1.8856	--	--
																						Mean1663	13.2853	0.44881	0.000509895	2.58766e-05	13.7927	0.47006	0.14306	0.14455	0.02995	2.08285e-05
																						Mean1665	25.5738	0.23868	0.000250461	6.36623e-06	24.4097	0.26461	1.44878	1.46392	--	--
																						Mean1666	49.3463	0.2537	0.000290818	3.59772e-06	48.426	0.27915	14.1129	14.2604	--	--
																						Mean1667	19.7872	0.35268	0.000375561	1.22065e-05	19.8939	0.38265	0.58631	0.59244	0.02996	2.0837e-05
																						Mean1668	18.3846	0.36711	0.000567333	1.86192e-05	21.1171	0.37923	0.42985	0.43435	0.02998	2.085e-05
																						Mean1669	7.71403	0.33318	0.000348059	2.91055e-05	9.68728	0.36596	0.23079	0.2332	0.03001	2.08702e-05
																						Mean1671	23.4252	0.26174	0.000309818	7.91921e-06	23.1478	0.28603	0.995	1.0054	0.03002	2.08757e-05
																						Mean1672	32.7573	0.49367	0.000921551	2.01917e-05	35.1931	0.50164	1.50734	1.52309	0.03004	2.08898e-05
																						Mean1673	13.9766	0.32615	0.000462367	1.92368e-05	14.4197	0.34152	0.18251	0.18442	0.03006	2.09031e-05
																						Mean1674	8.54115	0.39495	0.00064194	4.69493e-05	10.336	0.40562	0.25064	0.25326	0.03011	2.09358e-05
																						Mean1675	12.1178	0.42018	0.000470308	2.56223e-05	12.5349	0.44333	0.1889	0.19088	0.03013	2.09536e-05
																						Mean1676	28.7806	0.23624	0.000241649	5.56057e-06	27.429	0.26146	1.95689	1.97734	--	--
																						Mean1677	11.3095	0.45811	0.000522645	3.13929e-05	11.9664	0.47884	0.08575	0.08665	0.03016	2.09754e-05
																						Mean1678	5.88376	0.2915	0.00037876	3.72655e-05	8.08047	0.31112	0.26776	0.27056	--	--
																						Mean1679	30.5418	0.66189	0.000381641	1.10757e-05	30.6588	0.71457	0.46349	0.46834	0.03017	2.09831e-05
																						Mean1680	18.3352	0.72187	0.000854394	4.01784e-05	19.4081	0.73613	0.11913	0.12038	0.03021	2.10111e-05
																						Mean1681	5.11668	0.26819	0.000253519	3.47224e-05	6.82409	0.31195	0.19168	0.19368	--	--
																						Mean1682	12.4735	0.44591	0.000783867	4.21442e-05	14.1104	0.45487	0.1833	0.18521	0.03026	2.10404e-05
																						Mean1683	11.4606	0.3675	0.000568352	2.99351e-05	13.5612	0.3796	0.24745	0.25004	0.03029	2.10612e-05
																						Mean1684	9.06905	0.39379	0.00063878	4.39312e-05	10.903	0.40451	0.19419	0.19622	0.03033	2.10918e-05
																						Mean1686	13.6704	0.42367	0.000475159	2.30006e-05	15.739	0.44656	0.23335	0.23579	0.03035	2.11077e-05
																						Mean1689	13.1988	0.99935	0.000629186	4.80981e-05	13.8731	1.02615	0.04843	0.04893	0.0304	2.11412e-05
																						Mean1690	31.5393	0.45998	0.000824036	1.78774e-05	33.7511	0.4686	0.39091	0.39499	0.03042	2.11536e-05
																						Mean1691	18.8561	0.27976	0.000351446	1.0874e-05	18.8838	0.30117	0.599	0.60526	0.03043	2.11612e-05
																						Mean1692	19.3249	0.37459	0.000406434	1.35723e-05	19.621	0.40189	0.43586	0.44042	0.03044	2.11706e-05
																						Mean1693	20.0342	0.28033	0.000352758	1.02674e-05	20.124	0.30165	0.66863	0.67562	0.03045	2.11778e-05
																						Mean1694	15.3795	0.39942	0.000441317	1.87098e-05	15.731	0.42425	0.26299	0.26574	0.03047	2.11908e-05
																						Mean1695	14.0653	0.40382	0.000447471	2.07927e-05	14.4014	0.42827	0.21918	0.22147	0.03049	2.12052e-05
																						Mean1696	169.617	9.63555	2.799e-05	1.96583e-06	51.0322	0.18912	11.8171	11.9407	--	--
																						Mean1698	25.2234	0.26889	0.000326374	7.6497e-06	24.9948	0.29205	1.12374	1.13549	--	--
																						Mean1700	23.033	0.34783	0.000368729	1.02972e-05	23.1258	0.37846	0.57852	0.58457	0.0305	2.12124e-05
																						Mean1701	17.5424	0.46006	0.000824267	3.21543e-05	18.7707	0.46868	0.17957	0.18145	0.03054	2.12348e-05
																						Mean1702	37.8721	0.24776	0.000182121	3.8689e-06	33.8999	0.2404	3.05099	3.08288	--	--
																						Mean1704	8.84639	0.29577	0.000388802	2.54058e-05	11.2883	0.31478	0.43447	0.43901	0.03056	2.12524e-05
																						Mean1705	8.81669	0.39445	0.000434351	3.20408e-05	10.6294	0.41974	0.20973	0.21193	0.03059	2.12747e-05
																						Mean1708	9.32106	0.35366	0.000532177	3.39502e-05	11.9262	0.36667	0.42441	0.42884	0.03063	2.12983e-05
																						Mean1709	6.08861	0.32725	0.000275541	3.34343e-05	8.02394	0.38327	0.21762	0.21989	--	--
																						Mean1711	26.7035	0.29652	0.000296072	7.35444e-06	26.5637	0.33559	0.87618	0.88534	0.03063	2.13034e-05
																						Mean1712	5.37501	0.31338	0.000320086	3.8829e-05	6.98906	0.34942	0.16567	0.16741	--	--
																						Mean1714	18.7117	0.39627	0.000436905	1.51996e-05	19.1398	0.42139	0.37903	0.38299	0.03065	2.1314e-05
																						Mean1715	18.7681	0.27012	0.000329207	1.03511e-05	18.7494	0.29308	0.56987	0.57583	0.03066	2.13212e-05
																						Mean1716	22.0587	0.26549	0.00031852	8.58462e-06	21.8516	0.28919	0.85442	0.86335	0.03067	2.13272e-05
																						Mean1717	16.5022	0.38691	0.000423768	1.66446e-05	16.8088	0.41292	0.34963	0.35328	0.03069	2.13387e-05
																						Mean1718	20.4184	0.3462	0.00036643	1.15449e-05	20.548	0.37706	0.57186	0.57784	0.0307	2.13468e-05
																						Mean1719	37.4531	0.4772	0.000548619	1.01136e-05	38.2407	0.49698	0.41085	0.41515	0.03071	2.13538e-05
																						Mean1720	20.5327	0.36943	0.000399178	1.25289e-05	20.7612	0.39733	0.51016	0.51549	0.03072	2.13625e-05
																						Mean1721	18.6026	4.51047	0.000848441	0.000114774	19.2697	4.5386	0.03514	0.03551	0.03083	2.14423e-05
																						Mean1722	11.8706	0.84627	0.000556719	4.35083e-05	12.3528	0.87618	0.05814	0.05875	0.03088	2.14726e-05
																						Mean1724	31.746	0.46046	0.000525856	1.12744e-05	33.3441	0.48107	0.56627	0.57219	0.03089	2.14804e-05
																						Mean1726	22.4036	0.40684	0.000451703	1.32001e-05	22.7495	0.43104	0.54555	0.55125	0.0309	2.14896e-05
																						Mean1727	21.5938	0.39156	0.000430291	1.29422e-05	21.9533	0.41712	0.59768	0.60393	0.03092	2.14986e-05
																						Mean1728	16.6338	0.38748	0.00042457	1.65481e-05	16.9564	0.41344	0.26521	0.26799	0.03093	2.15101e-05
																						Mean1729	7.07452	0.27961	0.000351088	2.89577e-05	8.95991	0.30104	0.29485	0.29793	0.03096	2.15303e-05
																						Mean1730	13.0074	0.3389	0.00049434	2.22962e-05	13.5107	0.35307	0.21524	0.21749	0.03098	2.15458e-05
																						Mean1731	32.4582	0.43232	0.000487145	9.99235e-06	34.5303	0.4546	0.50154	0.50679	0.03099	2.15527e-05
																						Mean1733	20.7153	0.24977	0.000281194	8.38695e-06	20.2613	0.27567	1.12743	1.13921	0.031	2.15585e-05
																						Mean1734	5.50661	0.38556	0.000616502	6.90852e-05	7.21828	0.39667	0.16691	0.16865	0.03107	2.16066e-05
																						Mean1735	5.86859	0.33169	0.000345953	3.80461e-05	7.83752	0.3647	0.22368	0.22602	0.03111	2.1633e-05
																						Mean1736	13.1479	0.40257	0.00044573	2.21418e-05	13.5747	0.42713	0.254	0.25665	0.03113	2.16484e-05
																						Mean1737	15.6964	0.31437	0.000433388	1.59718e-05	16.1088	0.331	0.33248	0.33596	0.03115	2.16595e-05
																						Mean1738	4.93296	0.43798	0.000494975	6.70856e-05	6.4619	0.45989	0.13752	0.13895	0.03121	2.17062e-05
																						Mean1739	20.5352	0.39998	0.000442109	1.40417e-05	20.9818	0.42477	0.42234	0.42675	0.03123	2.1716e-05
																						Mean1740	7.72911	0.47896	0.000550995	4.92954e-05	9.50681	0.49866	0.25221	0.25484	0.03128	2.17502e-05
																						Mean1741	6.5116	0.38006	0.000414134	4.11146e-05	8.51132	0.40677	0.23161	0.23403	0.03132	2.17788e-05
																						Mean1743	27.3515	0.38237	0.000417383	9.87325e-06	27.6589	0.40884	0.75841	0.76634	0.03133	2.17857e-05
																						Mean1745	16.6499	0.38179	0.000416569	1.61841e-05	17.0361	0.40832	0.34456	0.34816	0.03134	2.1797e-05
																						Mean1746	5.06233	0.29853	0.000298959	3.90741e-05	6.91601	0.33724	0.18572	0.18766	0.03138	2.18241e-05
																						Mean1747	43.5438	0.38153	0.000605679	8.53957e-06	44.726	0.39284	1.45049	1.46566	0.03139	2.18301e-05
																						Mean1748	20.3441	0.32673	0.000338962	1.07751e-05	20.3924	0.36053	0.56256	0.56844	0.0314	2.18376e-05
																						Mean1749	24.2962	0.23853	0.000249965	6.69437e-06	23.3622	0.26443	1.2388	1.25175	--	--
																						Mean1750	22.1552	0.28994	0.000375096	9.80775e-06	22.232	0.30979	0.74328	0.75105	0.03141	2.18444e-05
																						Mean1752	14.4492	0.57661	0.00117	6.4826e-05	15.9517	0.58357	0.16265	0.16435	0.03148	2.18895e-05
																						Mean1753	11.5629	0.44083	0.000498912	2.89101e-05	13.4066	0.46257	0.1673	0.16905	0.03151	2.19096e-05
																						Mean1755	34.1424	0.43053	0.000740416	1.42286e-05	36.6641	0.43991	0.59847	0.60473	0.03152	2.19195e-05
																						Mean1756	28.3984	0.26971	0.000328271	6.82548e-06	32.5466	0.29274	2.18279	2.20561	--	--
																						Mean1757	14.9497	0.48387	0.000557625	2.59046e-05	16.8578	0.50335	0.24282	0.24536	0.03155	2.19375e-05
																						Mean1758	16.4424	0.43262	0.000746299	2.98686e-05	18.6944	0.44195	0.3661	0.36993	0.03158	2.19582e-05
																						Mean1759	19.4064	0.27783	0.000346986	1.04512e-05	19.4248	0.29955	0.62993	0.63651	0.03159	2.19655e-05
																						Mean1760	11.0055	0.44765	0.000508308	3.11113e-05	13.3891	0.46898	0.41564	0.41998	0.03162	2.19871e-05
																						Mean1762	19.6323	0.4289	0.000735834	2.4535e-05	21.8383	0.43833	0.44003	0.44463	0.03164	2.20042e-05
																						Mean1763	21.0024	0.27991	0.000351786	9.77084e-06	20.9356	0.3013	0.80487	0.81328	0.03165	2.2011e-05
																						Mean1764	34.7452	0.38611	0.000422636	7.88162e-06	36.0939	0.4122	0.59444	0.60065	0.03166	2.20165e-05
																						Mean1765	16.2652	0.36314	0.000390315	1.54462e-05	16.5353	0.39178	0.32115	0.32451	0.03168	2.20272e-05
																						Mean1766	16.4987	0.37826	0.000411609	1.6118e-05	17.1011	0.40517	0.37286	0.37676	0.03169	2.20384e-05
																						Mean1767	13.1033	0.32368	0.000456228	2.0219e-05	13.5087	0.33929	0.17649	0.17834	0.03171	2.20525e-05
																						Mean1769	19.1157	0.32916	0.000342383	1.1571e-05	19.2065	0.36257	0.51632	0.52172	0.03172	2.20605e-05
																						Mean1770	11.6844	0.45052	0.000796992	4.60458e-05	13.7473	0.45936	0.31889	0.32223	0.03177	2.20926e-05
																						Mean1772	24.5043	0.26447	0.000247314	7.15349e-06	23.4242	0.3086	0.95663	0.96663	0.03178	2.20975e-05
																						Mean1773	19.6384	0.36111	0.000387442	1.26953e-05	19.8035	0.38999	0.50382	0.50909	0.03179	2.21064e-05
																						Mean1774	11.0186	0.38801	0.000425314	2.50308e-05	11.5686	0.41392	0.07471	0.07549	0.03181	2.21238e-05
																						Mean1776	12.5866	0.41476	0.000462762	2.4187e-05	13.0657	0.43832	0.1581	0.15976	0.03184	2.21406e-05
																						Mean1777	13.2403	0.43797	0.000494968	2.49937e-05	13.7088	0.45989	0.17557	0.17741	0.03186	2.2158e-05
																						Mean1778	19.6852	0.25244	0.000287761	8.95651e-06	19.3152	0.27804	0.77746	0.78559	0.03187	2.21642e-05
																						Mean1779	12.1884	0.33585	0.000486634	2.33677e-05	12.6278	0.35029	0.18673	0.18869	0.0319	2.21805e-05
																						Mean1780	17.5502	0.50779	0.000589639	2.38426e-05	18.2297	0.52631	0.10969	0.11084	0.03192	2.2197e-05
																						Mean1781	15.1618	0.35703	0.000381705	1.61937e-05	15.3915	0.38644	0.25286	0.2555	0.03194	2.22083e-05
																						Mean1782	11.3497	0.49718	0.000575496	3.56372e-05	12.6364	0.51611	0.11366	0.11485	0.03197	2.22331e-05
																						Mean1783	12.893	0.42166	0.000715578	3.59626e-05	15.3046	0.43132	0.38159	0.38558	0.03201	2.22581e-05
																						Mean1784	26.0559	0.23299	0.000219957	5.90976e-06	26.5037	0.25373	0.5236	0.52908	0.03201	2.22622e-05
																						Mean1785	15.1593	0.30166	0.000402771	1.53442e-05	15.4379	0.31987	0.29246	0.29552	0.03203	2.22729e-05
																						Mean1787	16.5468	0.30668	0.000414778	1.44779e-05	16.8721	0.32424	0.36227	0.36606	0.03204	2.22829e-05
																						Mean1788	12.2179	0.35832	0.000383515	2.01929e-05	12.5453	0.38756	0.15502	0.15664	0.03206	2.2297e-05
																						Mean1790	6.1153	0.33076	0.000344653	3.63863e-05	7.82507	0.36392	0.18735	0.18931	0.0321	2.23223e-05
																						Mean1792	31.2928	0.27382	0.000262472	5.79218e-06	32.1904	0.31683	0.72793	0.73554	0.03211	2.23263e-05
																						Mean1793	57.3509	0.32147	0.000450788	4.55945e-06	57.003	0.33732	11.8331	11.9568	--	--
																						Mean1794	18.9267	0.33742	0.000354048	1.2052e-05	19.0322	0.36956	0.5141	0.51947	0.03212	2.23347e-05
																						Mean1795	18.6426	0.60567	0.00125	5.60058e-05	20.1976	0.6124	0.22813	0.23051	0.03217	2.23736e-05
																						Mean1796	7.63253	0.46637	0.000842412	7.62133e-05	8.97754	0.47486	0.15497	0.15659	0.03225	2.24266e-05
																						Mean1797	11.3317	0.47484	0.000545411	3.31632e-05	11.8813	0.49472	0.08462	0.0855	0.03228	2.24497e-05
																						Mean1798	24.4466	0.29029	0.000375928	8.90669e-06	24.5725	0.31009	0.74615	0.75395	0.03229	2.24559e-05
																						Mean1799	32.9709	0.3363	0.00048777	8.66148e-06	34.7	0.3507	0.49735	0.50255	0.0323	2.24619e-05
																						Mean1800	11.8802	0.39542	0.00043571	2.38643e-05	12.2801	0.42062	0.17544	0.17727	0.03232	2.24785e-05
																						Mean1803	22.7743	0.26621	0.000320193	8.34804e-06	22.4906	0.2898	0.88826	0.89754	0.03233	2.24843e-05
																						Mean1805	25.656	0.43732	0.000759546	1.96125e-05	27.3941	0.44651	0.40265	0.40686	0.03235	2.2498e-05
																						Mean1806	25.9507	0.56752	0.000667458	1.92993e-05	27.9445	0.58425	0.35294	0.35663	0.03237	2.25114e-05
																						Mean1807	10.9078	0.4045	0.000448425	2.68791e-05	11.7749	0.42889	0.08815	0.08907	0.0324	2.25301e-05
																						Mean1808	12.1055	0.48369	0.000557374	3.19712e-05	12.6587	0.50317	0.08934	0.09027	0.03243	2.25523e-05
																						Mean1809	19.8838	0.3731	0.000583167	1.78204e-05	22.3102	0.38486	0.43739	0.44196	0.03245	2.25647e-05
																						Mean1810	48.1961	0.48253	0.000555808	7.9995e-06	49.7363	0.50206	1.01999	1.03065	0.03246	2.25703e-05
																						Mean1812	20.3347	0.3922	0.000338162	1.18603e-05	20.2935	0.4364	0.55191	0.55768	0.03247	2.25785e-05
																						Mean1813	7.77595	0.34046	0.000498313	3.76443e-05	8.44562	0.3545	0.04441	0.04488	0.03251	2.26047e-05
																						Mean1814	25.4234	0.23386	0.000208022	5.94598e-06	23.6391	0.2495	1.79032	1.80903	--	--
																						Mean1817	35.0395	0.40793	0.000677504	1.22919e-05	36.5985	0.41808	0.33677	0.34029	0.03252	2.26132e-05
																						Mean1818	10.6053	0.43343	0.000488683	3.07037e-05	11.1076	0.45564	0.08233	0.08319	0.03255	2.26346e-05
																						Mean1819	9.99516	0.69705	0.000825675	6.97274e-05	11.016	0.71159	0.09202	0.09298	0.03262	2.26831e-05
																						Mean1820	20.0108	0.33403	0.00034926	1.12556e-05	20.0492	0.36668	0.49085	0.49598	0.03263	2.26909e-05
																						Mean1821	19.9122	0.39245	0.000431543	1.40818e-05	20.1699	0.41792	0.38408	0.3881	0.03264	2.27007e-05
																						Mean1823	15.0331	0.45719	0.000521388	2.35426e-05	17.7736	0.47797	0.49971	0.50494	0.03267	2.27171e-05
																						Mean1824	7.31629	0.33118	0.00047489	3.78626e-05	9.52744	0.34605	0.296	0.29909	0.0327	2.27434e-05
																						Mean1825	10.5127	0.36408	0.000559347	3.19925e-05	12.1374	0.37639	0.20846	0.21063	0.03274	2.27656e-05
																						Mean1827	8.34279	0.34535	0.000365229	2.81651e-05	10.4404	0.37633	0.25898	0.26168	0.03277	2.27852e-05
																						Mean1828	16.9274	0.24128	0.000258523	9.77654e-06	16.4068	0.2675	0.68568	0.69285	--	--
																						Mean1829	12.049	0.53946	0.000631286	3.82919e-05	13.5316	0.55695	0.2164	0.21867	0.0328	2.28119e-05
																						Mean1832	7.47259	4.8027	4.65591e-05	4.66742e-05	5.5751	0.41098	0.19008	0.19206	--	--
																						Mean1833	4.70949	0.25356	0.000225998	3.5653e-05	6.17338	0.29727	0.18191	0.18381	0.03284	2.28366e-05
																						Mean1835	19.8414	0.38477	0.000420765	1.37333e-05	20.1678	0.411	0.52262	0.52808	0.03285	2.28462e-05
																						Mean1836	29.199	0.23411	0.000206707	5.16734e-06	27.0935	0.24904	1.99812	2.01901	--	--
																						Mean1837	9.73171	0.34636	0.000513363	3.11477e-05	11.7018	0.35992	0.29805	0.30116	0.03288	2.28679e-05
																						Mean1838	14.2473	0.41669	0.000465439	2.15176e-05	14.7248	0.44009	0.23926	0.24176	0.03291	2.28828e-05
																						Mean1839	20.532	0.41923	0.000468986	1.507e-05	20.9315	0.44245	0.36233	0.36612	0.03292	2.28933e-05
																						Mean1840	15.558	0.44533	0.000505106	2.18289e-05	16.0388	0.46679	0.22194	0.22426	0.03294	2.29085e-05
																						Mean1841	14.0723	0.52298	0.000609718	3.11825e-05	14.6917	0.54097	0.17816	0.18002	0.03297	2.29302e-05
																						Mean1842	23.1395	0.25152	0.000285513	7.58101e-06	23.6591	0.27723	1.17345	1.18572	--	--
																						Mean1843	25.379	0.51304	0.000596591	1.67629e-05	27.7771	0.53137	0.37204	0.37593	0.03299	2.29418e-05
																						Mean1844	14.6575	0.60126	0.000710053	3.75133e-05	17.0143	0.61726	0.30826	0.31148	0.03303	2.29679e-05
																						Mean1845	21.0239	0.29469	0.000293436	9.28046e-06	20.9884	0.3341	0.39989	0.40407	0.03304	2.29744e-05
																						Mean1847	18.6834	0.35125	0.000373549	1.28585e-05	18.8829	0.38142	0.39791	0.40206	0.03305	2.29833e-05
																						Mean1848	18.285	0.365	0.000392925	1.38361e-05	18.5856	0.39341	0.36217	0.36596	0.03306	2.29929e-05
																						Mean1850	9.0743	0.42617	0.000728187	5.2328e-05	10.9937	0.43569	0.20606	0.20821	0.03312	2.30293e-05
																						Mean1851	31.6879	0.37375	0.00040525	8.25095e-06	33.5155	0.40115	0.38793	0.39198	0.03312	2.30351e-05
																						Mean1853	6.23831	0.30255	0.000404903	3.74826e-05	8.20506	0.32064	0.20846	0.21064	0.03316	2.30611e-05
																						Mean1855	19.7019	0.35005	0.000371861	1.21391e-05	19.7208	0.38038	0.5288	0.53433	0.03317	2.30696e-05
																						Mean1856	25.6944	0.38581	0.000422227	1.06463e-05	26.0144	0.41194	0.76031	0.76825	0.03318	2.3077e-05
																						Mean1858	40.3272	1.02795	8.27776e-05	4.11401e-06	26.444	0.20669	3.11351	3.14606	--	--
																						Mean1859	13.6156	0.4308	0.000741178	3.573e-05	17.2664	0.44018	0.20779	0.20996	0.03322	2.31018e-05
																						Mean1861	8.77208	0.34933	0.000370838	2.71898e-05	10.7152	0.37975	0.25232	0.25496	0.03325	2.31207e-05
																						Mean1862	15.5229	0.31271	0.000429353	1.59924e-05	15.9035	0.32954	0.26537	0.26815	0.03326	2.31318e-05
																						Mean1863	8.79182	0.31083	0.00031648	2.35196e-05	11.022	0.34732	0.43016	0.43466	--	--
																						Mean1864	7.84309	0.41538	0.00046362	3.89025e-05	9.78388	0.43889	0.19858	0.20065	0.0333	2.31589e-05
																						Mean1865	23.1491	0.2983	0.000298624	8.53771e-06	22.8502	0.33705	0.83443	0.84316	--	--
																						Mean1866	24.0907	0.34102	0.000499723	1.21908e-05	25.8956	0.35501	0.38288	0.38689	0.03331	2.31674e-05
																						Mean1868	23.8765	0.24375	0.000265535	7.03343e-06	23.169	0.27003	1.23313	1.24602	--	--
																						Mean1869	4.55418	3.71507	0.000320556	0.00019542	5.01496	3.88304	0.0193	0.0195	--	--
																						Mean1870	13.257	0.41898	0.000468627	2.33183e-05	15.506	0.44221	0.33726	0.34079	0.03334	2.31836e-05
																						Mean1871	39.5771	0.30806	0.000418116	6.10273e-06	40.6336	0.32545	0.46144	0.46626	0.03334	2.31878e-05
																						Mean1872	18.2841	0.31695	0.000325143	1.15647e-05	18.4038	0.35238	0.41104	0.41533	0.03336	2.31959e-05
																						Mean1873	18.4663	0.33883	0.000494176	1.5699e-05	20.412	0.35301	0.33018	0.33363	0.03337	2.32068e-05
																						Mean1875	45.845	0.37592	0.000590692	7.85558e-06	47.9663	0.38753	1.01466	1.02526	0.03338	2.32123e-05
																						Mean1876	12.0296	0.35434	0.000533931	2.64109e-05	12.5519	0.3673	0.15793	0.15959	0.03341	2.32306e-05
																						Mean1879	8.94114	0.4103	0.000456531	3.34974e-05	10.7839	0.43421	0.19969	0.20178	0.03344	2.32539e-05
																						Mean1881	36.0126	0.53428	0.00104	2.19431e-05	38.1807	0.54168	0.39857	0.40274	0.03346	2.32692e-05
																						Mean1882	22.3073	0.35321	0.000376317	1.08494e-05	22.3601	0.38312	0.65431	0.66116	0.03347	2.32767e-05
																						Mean1883	13.3438	0.48419	0.000893948	4.74455e-05	14.7033	0.49233	0.16149	0.16317	0.03352	2.33097e-05
																						Mean1884	15.6314	0.3958	0.000436237	1.81627e-05	15.9479	0.42096	0.30904	0.31227	0.03354	2.33223e-05
																						Mean1885	10.6415	0.40089	0.000658163	3.89434e-05	12.3514	0.41131	0.23381	0.23626	0.03358	2.33494e-05
																						Mean1886	9.51932	0.35592	0.000538041	3.36873e-05	11.5081	0.36877	0.28393	0.2869	0.03361	2.33729e-05
																						Mean1887	8.54319	0.43761	0.000760351	5.89845e-05	9.87667	0.44679	0.1988	0.20088	0.03367	2.34139e-05
																						Mean1888	20.1505	0.26026	0.000306377	9.13226e-06	20.7918	0.28479	0.70931	0.71673	0.03368	2.34202e-05
																						Mean1891	17.2379	0.41504	0.000697146	2.59637e-05	19.698	0.42492	0.41587	0.42021	0.0337	2.34383e-05
																						Mean1892	8.51241	0.39071	0.000630419	4.60049e-05	10.2347	0.40157	0.30661	0.30982	0.03375	2.34703e-05
																						Mean1893	25.4125	0.31395	0.000320897	8.22992e-06	25.1096	0.34989	0.9973	1.00772	--	--
																						Mean1894	17.1292	0.46191	0.000829577	3.32298e-05	17.7407	0.47049	1.00885	1.0194	--	--
																						Mean1896	17.9915	0.38044	0.000414665	1.49015e-05	18.3395	0.40711	0.39657	0.40071	0.03377	2.34806e-05
																						Mean1897	17.8899	0.487	0.000561839	2.18714e-05	19.5773	0.50634	0.33158	0.33505	0.03379	2.34958e-05
																						Mean1898	12.9706	0.46625	0.000533748	2.8145e-05	13.5373	0.48656	0.12749	0.12882	0.03382	2.35154e-05
																						Mean1899	22.6501	0.32618	0.000338175	9.65811e-06	22.5874	0.36006	0.79334	0.80163	0.03382	2.35221e-05
																						Mean1900	9.75745	0.48294	0.000556369	3.95673e-05	11.4491	0.50246	0.1965	0.19855	0.03386	2.35496e-05
																						Mean1905	18.2751	0.36676	0.000395411	1.39358e-05	18.5006	0.39496	0.40323	0.40744	0.03388	2.35593e-05
																						Mean1908	23.9295	0.34625	0.000366501	9.8528e-06	23.9073	0.3771	0.91226	0.92179	0.03389	2.35662e-05
																						Mean1909	39.3551	0.52879	0.00102	1.96197e-05	40.7085	0.53626	0.39881	0.40298	0.03391	2.35798e-05
																						Mean1910	15.6739	0.34032	0.000358132	1.47115e-05	15.8299	0.37202	0.42765	0.43212	0.03392	2.35901e-05
																						Mean1911	13.4907	0.36188	0.000553583	2.46133e-05	15.7758	0.37433	0.36699	0.37083	0.03395	2.36072e-05
																						Mean1915	13.8609	0.31063	0.000424313	1.76912e-05	14.1996	0.32771	0.29668	0.29978	0.03396	2.36195e-05
																						Mean1916	13.2041	0.40741	0.000452495	2.24436e-05	13.7766	0.43156	0.1642	0.16592	0.03399	2.36351e-05
																						Mean1917	9.81107	0.50949	0.000591889	4.28795e-05	10.524	0.52795	0.08478	0.08567	0.03403	2.36649e-05
																						Mean1919	22.611	0.30538	0.000411662	1.05144e-05	23.4035	0.32311	0.29935	0.30248	0.03404	2.36722e-05
																						Mean1921	46.655	0.37244	0.000581429	7.56629e-06	48.7293	0.38425	0.94629	0.95618	0.03405	2.36775e-05
																						Mean1922	5.66255	0.3535	0.000376716	4.27861e-05	7.34145	0.38336	0.13	0.13136	0.03409	2.37072e-05
																						Mean1929	10.1894	0.44967	0.000511072	3.38396e-05	12.1333	0.47087	0.22489	0.22724	0.03412	2.37308e-05
																						Mean1930	27.1404	0.33661	0.000352896	8.37902e-06	27.0434	0.36886	0.94495	0.95483	0.03413	2.37366e-05
																						Mean1933	6.38773	0.50416	0.000584812	6.47554e-05	7.77326	0.52282	0.12506	0.12637	0.0342	2.37816e-05
																						Mean1935	16.3026	0.32371	0.000456311	1.62544e-05	16.5792	0.33932	0.2523	0.25493	0.03421	2.37929e-05
																						Mean1936	13.8098	0.43433	0.00048994	2.36553e-05	14.227	0.45649	0.19937	0.20146	0.03424	2.38094e-05
																						Mean1938	13.3307	0.65219	0.000564746	3.42338e-05	13.835	0.67707	0.11618	0.11739	0.03427	2.38332e-05
																						Mean1939	21.8988	0.42895	0.000482478	1.46332e-05	22.3425	0.45146	0.32997	0.33342	0.03429	2.38434e-05
																						Mean1940	28.8619	0.37422	0.000586152	1.23565e-05	31.4062	0.38592	0.44743	0.45211	0.0343	2.3852e-05
																						Mean1941	9.30448	0.45273	0.000803308	5.84665e-05	10.6907	0.46152	0.16252	0.16422	0.03436	2.38926e-05
																						Mean1944	10.4375	0.41427	0.000695035	4.27049e-05	12.6425	0.42419	0.42546	0.42991	0.0344	2.39223e-05
																						Mean1945	12.7535	0.4355	0.000491546	2.57208e-05	13.2613	0.45757	0.12173	0.123	0.03443	2.39402e-05
																						Mean1946	13.2857	0.36024	0.000549289	2.47548e-05	15.1954	0.37279	0.32376	0.32714	0.03445	2.39574e-05
																						Mean1948	24.8086	0.34147	0.000359755	9.33479e-06	24.7446	0.373	0.90169	0.91112	--	--
																						Mean1949	7.06238	0.34936	0.000521077	4.36882e-05	8.83922	0.36269	0.25473	0.25739	0.03449	2.39878e-05
																						Mean1951	15.1424	0.30227	0.000404228	1.54164e-05	15.5299	0.3204	0.32991	0.33336	0.03451	2.39985e-05
																						Mean1953	13.377	0.48976	0.000565543	2.95155e-05	14.0078	0.50898	0.11395	0.11514	0.03454	2.4019e-05
																						Mean1954	6.70524	0.44535	0.000782287	7.81789e-05	8.13364	0.45432	0.16394	0.16565	0.03462	2.40734e-05
																						Mean1955	33.026	0.44026	0.000767864	1.54674e-05	34.8839	0.44937	0.40869	0.41297	0.03463	2.40842e-05
																						Mean1957	30.1663	0.26766	0.000323545	6.35308e-06	30.7573	0.29102	0.54028	0.54592	0.03464	2.40886e-05
																						Mean1958	17.6021	0.47421	0.000544569	2.1305e-05	19.6906	0.49413	0.30629	0.3095	0.03466	2.41034e-05
																						Mean1960	10.9535	0.44385	0.000503079	3.08454e-05	11.3873	0.4654	0.13344	0.13483	0.03469	2.41248e-05
																						Mean1964	21.4385	0.29651	0.000390553	1.05287e-05	21.6459	0.31542	0.64465	0.65139	0.0347	2.41322e-05
																						Mean1966	18.7094	0.87211	0.00102	5.28373e-05	20.1195	0.88519	0.15305	0.15465	0.03475	2.41689e-05
																						Mean1967	15.3495	0.36817	0.000397401	1.66803e-05	15.6292	0.39621	0.3528	0.35649	0.03477	2.41805e-05
																						Mean1968	20.5101	0.29543	0.000294507	9.53818e-06	22.4073	0.3347	0.4904	0.49553	0.03478	2.41871e-05
																						Mean1969	3.58663	0.26325	0.000245195	4.86538e-05	5.07061	0.30746	0.13416	0.13557	0.03483	2.4221e-05
																						Mean1970	14.117	0.3935	0.000433015	1.99402e-05	14.4422	0.41888	0.22664	0.22901	0.03485	2.42348e-05
																						Mean1971	7.17315	0.45739	0.000816634	7.76115e-05	8.94183	0.46608	0.25789	0.26058	0.03493	2.42888e-05
																						Mean1972	19.6481	0.30779	0.000417465	1.22731e-05	19.9513	0.32522	0.64192	0.64863	0.03494	2.42974e-05
																						Mean1974	10.1748	0.42325	0.000474576	3.0856e-05	12.1619	0.44617	0.24464	0.2472	0.03497	2.43188e-05
																						Mean1975	7.02713	0.3284	0.000341321	3.13885e-05	8.84073	0.36193	0.23019	0.2326	0.035	2.43406e-05
																						Mean1976	9.80787	0.36506	0.000393008	2.58006e-05	11.763	0.39346	0.2383	0.2408	0.03503	2.43586e-05
																						Mean1978	12.3679	0.32979	0.000471436	2.22147e-05	14.5135	0.3448	0.33676	0.34028	0.03505	2.4374e-05
																						Mean1979	19.2833	0.41396	0.000461635	1.57408e-05	19.6706	0.43757	0.32288	0.32626	0.03507	2.4385e-05
																						Mean1981	19.198	0.38187	0.000416675	1.404e-05	19.44	0.40839	0.37148	0.37536	0.03508	2.43947e-05
																						Mean1983	20.6221	0.37634	0.000408909	1.28028e-05	20.8535	0.40346	0.48183	0.48687	0.03509	2.44036e-05
																						Mean1984	6.16046	0.38047	0.000414715	4.35254e-05	7.6401	0.40714	0.12325	0.12454	0.03514	2.44339e-05
																						Mean1985	37.5378	0.37752	0.000410565	7.06455e-06	38.9464	0.40451	0.49163	0.49677	0.03514	2.44388e-05
																						Mean1988	11.8426	0.46146	0.000527222	3.03267e-05	13.7323	0.48202	0.28349	0.28645	0.03517	2.44599e-05
																						Mean1989	21.9129	0.54892	0.00108	3.8311e-05	23.9413	0.55616	0.40636	0.41061	0.03521	2.44866e-05
																						Mean1991	16.2453	0.30066	0.000400385	1.42347e-05	16.5153	0.319	0.41496	0.41929	0.03523	2.44965e-05
																						Mean1993	11.5868	0.40416	0.000667132	3.64146e-05	13.3904	0.41445	0.2506	0.25322	0.03526	2.45218e-05
																						Mean1994	7.15674	0.28609	0.000366122	2.96993e-05	8.81776	0.30652	0.21229	0.21451	0.03529	2.45424e-05
																						Mean1995	19.1969	0.3068	0.000415071	1.24882e-05	19.5145	0.32434	0.58866	0.59481	0.0353	2.45511e-05
																						Mean1996	4.99167	0.28616	0.000281049	3.79248e-05	6.69847	0.32712	0.27095	0.27378	--	--
																						Mean1997	20.5231	0.31971	0.000329038	1.04077e-05	20.4328	0.35466	0.66156	0.66848	0.03531	2.45584e-05
																						Mean1998	11.6112	0.44668	0.000506962	2.93876e-05	14.1657	0.46806	0.38042	0.3844	0.03534	2.45788e-05
																						Mean1999	12.1089	0.31236	0.000428502	2.04587e-05	12.5419	0.32923	0.13939	0.14084	0.03536	2.4593e-05
																						Mean2000	17.4738	0.30313	0.00040628	1.3427e-05	17.7316	0.32115	0.48503	0.4901	0.03538	2.46024e-05
																						Mean2001	19.9559	0.28877	0.000284866	9.57411e-06	19.6003	0.32926	0.5404	0.54605	0.03539	2.4609e-05
																						Mean2002	10.8787	0.44668	0.000786068	4.85117e-05	12.4279	0.45562	0.22792	0.2303	0.03544	2.46427e-05
																						Mean7	55.4371	1.08846	0.000579503	1.12286e-05	56.1209	1.11569	0.16183	0.16364	0.03545	2.46506e-05	180626
																						Mean17	63.7251	0.67073	0.00101	1.39747e-05	64.7962	0.67966	0.67311	0.68068	0.03546	2.46603e-05	--
																						Mean18	83.5027	2.24532	0.000339135	7.43623e-06	84.7909	2.33998	0.21918	0.22164	0.03547	2.46654e-05	--
																						Mean20	28.5088	0.88369	0.00173	6.76095e-05	28.9544	0.8898	0.03034	0.03068	0.03554	2.47125e-05	--
																						Mean23	7.67196	0.48493	0.000369477	3.59313e-05	8.39893	0.52053	0.04353	0.04401	0.03557	2.47374e-05	--
																						Mean27	48.5074	0.93747	0.000442329	9.22197e-06	49.2385	0.97685	0.13881	0.14037	0.03558	2.47439e-05	--
																						Mean31	36.164	0.33125	0.000395893	6.58912e-06	36.4612	0.34828	0.44027	0.44522	0.03559	2.47484e-05	--
																						Mean32	55.0975	0.80464	0.000355357	6.35644e-06	55.9399	0.85989	0.22811	0.23068	0.03559	2.47529e-05	--
																						Mean34	119.582	2.9098	0.000379693	6.55437e-06	120.024	2.99108	0.5882	0.59481	0.0356	2.47574e-05	--
																						Mean37	26.1809	0.65595	0.000448278	1.4296e-05	26.3791	0.68717	0.24516	0.24791	0.03562	2.47674e-05	--
																						Mean38	42.6564	0.92924	0.00184	4.98846e-05	43.4432	0.93525	0.14591	0.14755	0.03567	2.48021e-05	--
																						Mean41	46.3988	0.45266	0.000669158	9.88471e-06	46.6929	0.46248	0.8047	0.81374	0.03568	2.48089e-05	--
																						Mean47	43.7201	0.58616	0.00099624	1.86315e-05	44.2165	0.59372	0.37898	0.38324	0.03569	2.48219e-05	--
																						Mean50	14.3555	0.31244	0.000357216	1.4933e-05	14.9021	0.33176	0.09591	0.09698	0.03571	2.48323e-05	--
																						Mean51	28.8498	0.2421	0.000189669	4.89744e-06	28.4085	0.26085	0.34538	0.34926	0.03571	2.48357e-05	--
																						Mean53	141.339	6.34725	0.000453574	1.06414e-05	142.055	6.41861	0.07515	0.076	0.03572	2.48431e-05	--
																						Mean63	10.7002	0.45254	0.000668852	4.28357e-05	11.0898	0.46236	0.03464	0.03503	0.03577	2.48729e-05	--
																						Mean67	19.4534	0.42159	0.000222414	1.07997e-05	20.0113	0.51969	0.09582	0.0969	0.03578	2.48804e-05	--
																						Mean69	45.2463	0.77203	0.00146	3.24111e-05	46.1807	0.77847	0.08125	0.08216	0.03581	2.49029e-05	--
																						Mean72	21.0569	0.98353	0.00197	0.0001128	21.4333	0.98944	0.02527	0.02555	0.03592	2.49814e-05	--
																						Mean73	4.21873	0.30256	0.000253745	4.22288e-05	4.75737	0.34613	0.04223	0.04271	0.03597	2.50107e-05	--
																						Mean74	35.2242	0.89816	0.00177	5.65067e-05	35.8378	0.90424	0.06142	0.06211	0.03602	2.505e-05	--
																						Mean75	4.30909	0.27732	0.000332147	4.44121e-05	5.42876	0.29341	0.05487	0.05548	0.03607	2.50809e-05	--
																						Mean78	4.86516	0.37438	0.000629026	8.02004e-05	5.53626	0.38124	0.0445	0.045	0.03615	2.51367e-05	--
																						Mean80	74.2641	0.76694	0.000571641	6.85717e-06	75.7558	0.78994	0.53444	0.54045	0.03615	2.51414e-05	--
																						Mean84	31.0599	0.46087	0.000233315	7.12293e-06	31.5285	0.55629	0.17629	0.17827	0.03616	2.51464e-05	--
																						Mean88	21.6482	0.621	0.000373214	1.4569e-05	23.1071	0.66371	0.1058	0.10699	0.03618	2.51565e-05	--
																						Mean89	32.8734	0.731	0.00136	3.98236e-05	33.5202	0.7376	0.08787	0.08885	0.03621	2.51842e-05	--
																						Mean90	25.7388	0.7488	0.0014	5.34809e-05	26.2021	0.75533	0.04316	0.04364	0.03627	2.52214e-05	--
																						Mean95	27.3808	0.43168	0.000404609	1.01464e-05	27.8049	0.4575	0.20434	0.20664	0.03628	2.52285e-05	--
																						Mean97	15.2133	0.5071	0.00080062	3.88348e-05	15.855	0.5157	0.05285	0.05344	0.03632	2.52555e-05	--
																						Mean101	5.30956	0.61666	0.00107	0.000171419	5.76132	0.62395	0.01787	0.01807	0.03649	2.53747e-05	--
																						Mean105	43.9737	0.64982	0.000522334	9.731e-06	44.8373	0.67351	0.39031	0.39469	0.0365	2.53814e-05	--
																						Mean107	40.0418	1.40176	0.000965265	3.09386e-05	40.6479	1.41783	0.08805	0.08904	0.03653	2.5403e-05	--
																						Mean113	5.24219	0.60874	0.00105	0.000168795	8.64759	0.61609	0.10573	0.10692	0.0367	2.55203e-05	--
																						Mean114	19.3234	0.44108	0.000641714	2.24087e-05	19.8379	0.45125	0.0663	0.06704	0.03672	2.55359e-05	--
																						Mean116	30.2392	0.55449	0.000917431	2.38316e-05	30.8021	0.5624	0.12715	0.12858	0.03674	2.55525e-05	--
																						Mean124	76.4442	1.8562	0.00101	1.99603e-05	77.1689	1.87325	0.21679	0.21922	0.03676	2.55664e-05	--
																						Mean125	53.3761	1.98232	0.0013	3.97461e-05	54.0218	1.99594	0.10922	0.11045	0.0368	2.5594e-05	--
																						Mean128	18.7206	0.38663	0.000217946	1.06921e-05	19.5812	0.48012	0.14141	0.14299	0.03681	2.56015e-05	--
																						Mean129	36.0009	0.97316	0.000654186	1.84202e-05	36.6368	0.99486	0.17317	0.17511	0.03683	2.56143e-05	--
																						Mean130	35.2049	0.38663	0.00051611	9.23589e-06	35.4135	0.39916	0.5661	0.57246	0.03684	2.56207e-05	--
																						Mean132	35.0529	0.92118	0.00182	5.96799e-05	35.9719	0.92721	0.06217	0.06287	0.0369	2.56622e-05	--
																						Mean134	19.2553	0.65461	9.65783e-05	1.10653e-05	15.8188	0.47483	0.12639	0.12781	0.03691	2.56699e-05	--
																						Mean136	28.8887	0.47055	0.000711942	1.73068e-05	29.5474	0.4799	0.20038	0.20263	0.03693	2.56819e-05	--
																						Mean145	10.4811	0.69827	0.000329213	2.95886e-05	10.7828	0.75791	0.04194	0.04241	0.03696	2.57025e-05	--
																						Mean146	4.88746	0.44137	0.000642388	8.87238e-05	5.4864	0.45153	0.02603	0.02632	0.03705	2.57642e-05	--
																						Mean152	11.8586	0.37421	0.000181146	1.69367e-05	13.014	0.51314	0.11247	0.11373	0.03707	2.5776e-05	--
																						Mean153	121.179	3.08139	0.000816987	1.3524e-05	122.897	3.10588	0.21003	0.21239	0.03708	2.57854e-05	--
																						Mean154	27.792	0.47009	0.000289052	8.50985e-06	29.573	0.52923	0.15924	0.16103	0.03709	2.57913e-05	--
																						Mean162	30.153	0.53704	0.000874218	2.22629e-05	30.8069	0.54517	0.25037	0.25318	0.03711	2.58068e-05	--
																						Mean163	27.1118	0.51826	0.000329766	9.79134e-06	27.7873	0.56639	0.15063	0.15232	0.03712	2.58136e-05	--
																						Mean166	31.617	0.61025	0.000441147	1.12499e-05	32.2908	0.64075	0.10725	0.10846	0.03713	2.58214e-05	--
																						Mean168	62.3326	1.29831	0.000804433	1.55443e-05	63.752	1.31741	0.12429	0.12568	0.03715	2.58322e-05	--
																						Mean170	11.2618	0.53726	0.000327584	2.39266e-05	11.5496	0.58754	0.05883	0.0595	0.03717	2.58489e-05	--
																						Mean174	13.145	0.32625	0.000173917	1.4097e-05	12.8843	0.44573	0.12878	0.13023	0.03718	2.58587e-05	--
																						Mean176	8.49159	0.78744	0.0015	0.000179861	10.4157	0.79382	0.06282	0.06353	0.03736	2.59837e-05	--
																						Mean180	16.462	0.50697	0.000800284	3.58672e-05	16.8548	0.51557	0.05438	0.05499	0.0374	2.60087e-05	--
																						Mean185	47.8233	0.44785	0.000119463	5.91305e-06	44.3595	0.85079	0.29973	0.3031	0.03741	2.60128e-05	--
																						Mean188	41.9624	0.72745	0.000282233	7.03866e-06	43.4013	0.81283	0.19681	0.19903	0.03741	2.60177e-05	--
																						Mean191	13.6185	0.27923	0.000291262	1.31414e-05	14.4135	0.3036	0.10748	0.10869	0.03743	2.60268e-05	--
																						Mean192	46.9216	0.48561	0.000309902	5.29143e-06	47.2577	0.53773	0.32896	0.33266	0.03743	2.60305e-05	--
																						Mean196	65.2221	2.84478	0.000226774	9.93667e-06	67.7528	3.12534	0.18637	0.18846	0.03744	2.60374e-05	--
																						Mean197	12.6262	0.48188	0.000739256	4.17557e-05	13.4451	0.49097	0.04411	0.04461	0.03748	2.60665e-05	--
																						Mean202	11.2786	1.36834	7.00422e-05	1.77672e-05	8.71687	0.32909	0.08768	0.08867	0.0375	2.60788e-05	--
																						Mean204	52.2677	0.99445	0.000498978	9.82246e-06	52.7083	1.02741	0.12795	0.12939	0.03751	2.60856e-05	--
																						Mean206	23.7261	0.4772	0.000109885	1.13325e-05	20.5232	0.75409	0.17394	0.1759	0.03752	2.60935e-05	--
																						Mean210	19.4021	0.55974	0.000225465	1.26269e-05	19.449	0.68092	0.12809	0.12953	0.03754	2.61023e-05	--
																						Mean212	60.5206	1.29262	0.000650478	1.27227e-05	61.1345	1.31753	0.15373	0.15545	0.03755	2.61111e-05	--
																						Mean215	45.4748	0.97725	0.000166846	7.89785e-06	45.0251	1.34637	0.2119	0.21428	0.03756	2.61166e-05	--
																						Mean218	31.1159	0.41328	0.000576814	1.20608e-05	31.5772	0.42448	0.28138	0.28455	0.03757	2.6125e-05	--
																						Mean219	51.6413	1.5718	0.000672094	1.72329e-05	52.2029	1.59746	0.11317	0.11444	0.03759	2.6137e-05	--
																						Mean221	25.6088	0.32957	0.000392386	9.21684e-06	26.1516	0.34678	0.2174	0.21985	0.03759	2.61434e-05	--
																						Mean222	18.1616	0.60053	0.00103	4.72972e-05	19.3582	0.60795	0.07474	0.07558	0.03764	2.61763e-05	--
																						Mean224	7.1893	1.0562	0.000500036	7.39497e-05	7.6259	1.08998	0.01907	0.01928	0.03772	2.62277e-05	--
																						Mean229	19.7127	0.67506	0.00122	5.61203e-05	20.1592	0.68194	0.03385	0.03423	0.03777	2.62668e-05	--
																						Mean232	6.81043	0.46024	0.000255385	3.29774e-05	7.0454	0.53732	0.03479	0.03518	0.0378	2.62897e-05	--
																						Mean235	23.427	0.67201	0.00121	4.67677e-05	23.9465	0.67891	0.06933	0.07011	0.03785	2.63222e-05	--
																						Mean241	18.4481	0.476	0.000381224	1.51338e-05	19.0993	0.50873	0.09546	0.09654	0.03787	2.63327e-05	--
																						Mean243	37.1865	0.73861	0.000332794	8.64614e-06	38.1019	0.79889	0.24163	0.24435	0.03788	2.63388e-05	--
																						Mean246	30.9045	0.42627	0.000606965	1.29946e-05	31.4241	0.43695	0.26977	0.27281	0.03789	2.63478e-05	--
																						Mean254	19.0521	0.70885	0.000322269	1.62201e-05	19.0739	0.77181	0.09606	0.09714	0.0379	2.63591e-05	--
																						Mean258	22.7861	0.3955	0.000204721	8.91445e-06	23.5753	0.50702	0.13273	0.13422	0.03791	2.63653e-05	--
																						Mean261	28.9641	1.96978	0.000629713	3.27882e-05	29.445	1.99987	0.05016	0.05072	0.03795	2.63881e-05	--
																						Mean266	68.7707	1.55004	0.000729028	1.39888e-05	69.5134	1.57307	0.12915	0.1306	0.03796	2.63978e-05	--
																						Mean268	6.23842	0.39632	0.000537993	5.49453e-05	6.82061	0.40832	0.03139	0.03174	0.03801	2.6436e-05	--
																						Mean269	45.8148	1.84492	0.000706935	2.24769e-05	46.6936	1.87027	0.10837	0.10959	0.03804	2.64516e-05	--
																						Mean272	21.3197	0.36982	0.00047868	1.38949e-05	21.9537	0.38342	0.0996	0.10072	0.03805	2.64613e-05	--
																						Mean275	39.4218	0.55264	0.000912843	1.81457e-05	39.9324	0.56057	0.47332	0.47864	0.03807	2.64739e-05	--
																						Mean281	21.0903	0.27695	0.000286771	8.38441e-06	21.5184	0.30169	0.247	0.24978	0.03808	2.64798e-05	--
																						Mean282	24.6129	0.42864	0.0006125	1.65165e-05	25.0821	0.43924	0.19415	0.19633	0.03809	2.64912e-05	--
																						Mean285	49.7364	0.84194	0.000188507	6.3062e-06	49.0246	1.08708	0.24918	0.25198	0.0381	2.64956e-05	--
																						Mean288	5.65209	0.24989	0.000261761	2.82205e-05	6.04643	0.26986	0.05307	0.05367	0.03813	2.65153e-05	--
																						Mean291	62.423	10.2667	0.000904794	6.52629e-05	63.435	10.2939	0.08105	0.08196	0.03819	2.65606e-05	--
																						Mean292	54.9666	0.80358	0.000240106	5.45618e-06	54.8049	0.93476	0.39315	0.39757	0.0382	2.65644e-05	--
																						Mean294	20.1209	0.44578	0.000652825	2.2032e-05	20.6368	0.4558	0.06105	0.06174	0.03822	2.65798e-05	--
																						Mean303	13.8657	0.51545	0.000821062	4.41884e-05	14.298	0.52391	0.06354	0.06426	0.03827	2.66105e-05	--
																						Mean304	39.7015	1.43339	0.000694746	2.20218e-05	40.2274	1.45717	0.08367	0.08461	0.03829	2.66258e-05	--
																						Mean312	114.862	4.98138	0.000321927	8.96743e-06	115.737	5.12592	0.14202	0.14362	0.0383	2.6632e-05	--
																						Mean313	3.39454	0.3325	0.000487992	8.40637e-05	3.84127	0.34204	0.02449	0.02477	0.03838	2.66905e-05	--
																						Mean314	109.807	2.96216	0.000368463	7.08542e-06	109.795	3.04938	0.85573	0.86535	0.03839	2.66954e-05	--
																						Mean318	131.146	3.60261	0.000592892	9.9229e-06	132.94	3.64113	0.23365	0.23627	0.0384	2.67023e-05	--
																						Mean321	13.1089	0.56208	0.000936283	5.6653e-05	13.6122	0.5699	0.03341	0.03379	0.03845	2.67417e-05	--
																						Mean322	13.1883	0.36158	0.000223712	1.46337e-05	13.7181	0.44217	0.09606	0.09714	0.03847	2.67519e-05	--
																						Mean323	18.3236	0.32248	0.000186489	9.90383e-06	18.7242	0.42371	0.1528	0.15452	0.03848	2.67588e-05	--
																						Mean324	17.5866	0.88884	0.000500286	2.75392e-05	18.0683	0.91987	0.05329	0.05389	0.03851	2.67779e-05	--
																						Mean325	8.34637	0.31107	0.000215739	2.11097e-05	8.71407	0.37917	0.06254	0.06325	0.03853	2.67926e-05	--
																						Mean326	18.8912	0.32806	0.000156473	1.01029e-05	17.8159	0.4713	0.16039	0.16219	0.03854	2.67996e-05	--
																						Mean328	4.88864	0.7422	0.00139	0.000276433	5.27448	0.74875	0.0169	0.01709	0.03881	2.69919e-05	--
																						Mean329	20.635	0.86831	0.0017	9.02024e-05	21.1109	0.87446	0.02843	0.02875	0.0389	2.70546e-05	--
																						Mean333	21.8587	0.5101	0.000807953	2.73859e-05	22.1831	0.51865	0.08378	0.08473	0.03893	2.70736e-05	--
																						Mean335	30.8844	0.33369	0.000178619	6.06039e-06	30.1079	0.45241	0.24948	0.25228	0.03894	2.70779e-05	--
																						Mean336	8.11527	0.33665	0.000407209	3.02747e-05	8.9506	0.3531	0.06738	0.06814	0.03897	2.70989e-05	--
																						Mean338	9.26923	0.35355	0.000443225	2.91676e-05	10.1649	0.36842	0.06363	0.06434	0.039	2.71192e-05	--
																						Mean340	37.3253	0.29057	0.000313571	5.09366e-06	37.9302	0.31311	0.54355	0.54966	0.039	2.71227e-05	--
																						Mean341	5.15857	0.35696	0.000450576	5.34256e-05	5.71854	0.37153	0.03435	0.03474	0.03906	2.71599e-05	--
																						Mean344	32.2635	0.65412	0.000360338	9.80918e-06	32.8227	0.7016	0.2055	0.20781	0.03907	2.71667e-05	--
																						Mean347	23.6782	0.53988	0.000294318	1.08201e-05	24.3745	0.60366	0.11222	0.11348	0.03908	2.71742e-05	--
																						Mean349	31.8264	0.51896	0.000330189	8.35284e-06	32.302	0.56701	0.21709	0.21953	0.03908	2.718e-05	--
																						Mean350	14.0961	0.60784	0.00105	6.25709e-05	14.6604	0.6152	0.03765	0.03807	0.03915	2.72236e-05	--
																						Mean355	5.86392	0.54168	0.000885704	0.00011669	6.29687	0.54975	0.01789	0.0181	0.03926	2.73047e-05	--
																						Mean356	3.40413	0.3405	0.000513306	8.90055e-05	4.47815	0.34941	0.05208	0.05267	0.03935	2.73666e-05	--
																						Mean367	12.2393	0.30737	0.000346993	1.70286e-05	13.104	0.32739	0.07986	0.08076	0.03937	2.73784e-05	--
																						Mean373	22.9631	0.74935	0.0014	6.00362e-05	23.6452	0.75587	0.03469	0.03508	0.03943	2.74202e-05	--
																						Mean376	3.86958	0.51594	0.000374939	7.42992e-05	4.3925	0.55251	0.02204	0.02229	0.0395	2.74719e-05	--
																						Mean380	52.3516	1.44026	0.000637479	1.53099e-05	53.2288	1.46694	0.09398	0.09504	0.03952	2.74825e-05	--
																						Mean382	20.1727	0.80427	0.00154	7.90581e-05	20.7855	0.81059	0.03905	0.03949	0.0396	2.75375e-05	--
																						Mean386	46.5855	0.53948	0.000880252	1.45559e-05	47.8616	0.54758	0.19994	0.20219	0.03961	2.75476e-05	--
																						Mean388	22.3847	0.67271	0.00121	4.90547e-05	23.044	0.67961	0.04349	0.04398	0.03966	2.75817e-05	--
																						Mean390	17.7059	0.4448	0.0006505	2.49149e-05	18.5175	0.45485	0.05821	0.05886	0.03969	2.7599e-05	--
																						Mean396	21.747	0.60602	0.00105	4.02934e-05	22.3767	0.6134	0.04163	0.0421	0.03973	2.76271e-05	--
																						Mean397	16.6866	0.31344	0.000163802	1.08906e-05	15.8404	0.43171	0.17681	0.17879	0.03974	2.76346e-05	--
																						Mean4	18.4921	0.24746	0.000174683	7.38247e-06	18.4005	0.24085	0.22855	0.23116	0.03975	2.76398e-05	180702
																						Mean20	13.4683	0.38059	0.000651813	3.04168e-05	14.6215	0.38733	0.09111	0.09215	0.03978	2.76609e-05
																						Mean30	10.4909	0.32238	0.000457001	2.53552e-05	12.0058	0.3331	0.09588	0.09697	0.0398	2.76786e-05
																						Mean32	18.9424	0.25773	0.000281676	8.95591e-06	20.3926	0.27717	0.23758	0.24029	0.03981	2.76848e-05
																						Mean35	47.9996	0.42664	0.000197203	4.52962e-06	46.9382	0.56413	0.38572	0.39012	0.03982	2.76879e-05
																						Mean43	10.6039	0.31844	0.000445252	2.43674e-05	11.1884	0.32955	0.09138	0.09242	0.03984	2.77049e-05
																						Mean45	8.60434	0.33816	0.000505813	3.47543e-05	9.92957	0.34749	0.0934	0.09447	0.03987	2.7729e-05
																						Mean49	24.6888	0.23879	0.000223065	5.99841e-06	26.1525	0.25736	0.37235	0.3766	0.03988	2.77332e-05
																						Mean51	35.9904	0.24787	0.000174184	3.79092e-06	41.1072	0.24068	0.96669	0.97771	0.03988	2.77359e-05
																						Mean90	9.74317	0.34816	0.000538232	3.30655e-05	10.5524	0.35674	0.06969	0.07049	0.03992	2.77588e-05
																						Mean115	16.6501	0.37595	0.000360534	1.44075e-05	17.3728	0.40435	0.11489	0.1162	0.03993	2.77689e-05
																						Mean128	16.7387	0.30158	0.000396864	1.36569e-05	22.462	0.31462	0.25485	0.25776	0.03995	2.77784e-05
																						Mean138	11.1912	0.3704	0.000614708	3.39592e-05	12.8281	0.37764	0.09932	0.10045	0.03998	2.7802e-05
																						Mean141	10.4134	0.29504	0.000378862	2.09536e-05	11.2202	0.30894	0.11659	0.11792	0.04	2.78166e-05
																						Mean146	19.7906	0.34262	0.000520141	1.5621e-05	24.5757	0.35161	0.27963	0.28282	0.04002	2.78274e-05
																						Mean165	13.2462	0.3277	0.000473137	2.08869e-05	14.4875	0.33792	0.10106	0.10221	0.04004	2.78419e-05
																						Mean167	13.2654	0.27067	0.000314853	1.3919e-05	14.9218	0.2882	0.12309	0.12449	0.04005	2.78516e-05
																						Mean168	16.3963	0.43772	0.000885958	3.75715e-05	17.3932	0.44247	0.08038	0.0813	0.04009	2.78777e-05
																						Mean178	20.9844	0.27631	0.000329339	9.13693e-06	22.7352	0.29296	0.1972	0.19944	0.0401	2.78841e-05
																						Mean190	10.8937	0.3375	0.000503729	2.7317e-05	11.5491	0.34689	0.07065	0.07145	0.04012	2.79031e-05
																						Mean195	23.4217	0.25298	0.000269133	7.02195e-06	24.8124	0.27296	0.25949	0.26245	0.04013	2.7908e-05
																						Mean198	37.1088	0.34142	0.000357586	6.11304e-06	38.3198	0.36583	0.40749	0.41214	0.04014	2.79122e-05
																						Mean214	23.404	0.29821	0.000387537	9.53518e-06	24.5975	0.31168	0.10669	0.1079	0.04015	2.79189e-05
																						Mean215	15.7628	0.75431	0.000741575	4.21898e-05	17.2115	0.77019	0.11379	0.11509	0.04019	2.79482e-05
																						Mean231	33.9307	0.23928	0.000225501	4.38669e-06	34.9488	0.25819	0.3224	0.32607	0.04019	2.79513e-05
																						Mean246	8.19196	0.39992	0.000725943	5.75614e-05	9.15016	0.40585	0.05218	0.05278	0.04025	2.79913e-05
																						Mean251	15.1508	0.27984	0.000338475	1.29606e-05	15.9922	0.29594	0.11326	0.11455	0.04026	2.80003e-05
																						Mean253	21.5972	0.49251	0.00116	4.11972e-05	24.5725	0.4961	0.18925	0.19141	0.04031	2.80289e-05
																						Mean267	22.1061	0.2464	0.000250663	7.11901e-06	22.5627	0.26673	0.39811	0.40265	0.04031	2.80339e-05
																						Mean302	19.6272	0.44245	0.000416826	1.47743e-05	20.7043	0.46821	0.11521	0.11653	0.04033	2.80442e-05
																						Mean303	7.10313	0.26871	0.000309843	2.56596e-05	8.95882	0.28654	0.13061	0.1321	0.04035	2.8062e-05
																						Mean304	25.9673	0.29184	0.000212208	6.61355e-06	28.5576	0.3538	0.71557	0.72373	0.04036	2.80666e-05
																						Mean340	13.3756	0.40921	0.000763376	3.76854e-05	14.2251	0.41481	0.06038	0.06107	0.0404	2.80928e-05
																						Mean355	10.1401	0.40279	0.000737401	4.74755e-05	11.5264	0.40862	0.16254	0.1644	0.04044	2.81258e-05
																						Mean377	20.23	0.24826	0.000256082	7.87866e-06	21.5888	0.26856	0.19792	0.20017	0.04045	2.81313e-05
																						Mean382	30.1247	0.60551	0.000595062	1.56418e-05	32.3307	0.62393	0.16863	0.17055	0.04047	2.81422e-05
																						Mean481	27.7729	0.3753	0.000305712	7.85106e-06	29.2631	0.41705	0.4661	0.47142	0.04048	2.81476e-05
																						Mean519	8.5714	0.4297	0.000850266	6.7971e-05	9.45936	0.43467	0.04948	0.05004	0.04054	2.81949e-05
																						Mean523	21.8377	0.68465	0.000674869	2.61822e-05	23.3947	0.70149	0.17983	0.18188	0.04057	2.82131e-05
																						Mean570	20.8559	0.24014	0.000229308	7.19432e-06	21.5189	0.25949	0.31737	0.32098	0.04058	2.82181e-05
																						Mean587	70.0121	1.73584	0.0002301	6.83757e-06	69.9218	1.95898	0.34458	0.34851	0.04058	2.82229e-05
																						Mean596	18.7512	0.34972	0.000543395	1.73817e-05	19.9475	0.35819	0.14936	0.15107	0.0406	2.8235e-05
																						Mean11	40.5465	0.25198	0.000169748	3.34816e-06	40.8772	0.23916	0.51919	0.52511	0.04061	2.82373e-05
																						Mean31	13.5661	0.30782	0.000414431	1.7626e-05	14.7177	0.3201	0.12329	0.1247	0.04062	2.82496e-05
																						Mean89	40.6847	0.29781	0.000259748	4.42764e-06	41.7546	0.33848	0.51395	0.51982	0.04063	2.82526e-05
																						Mean117	18.5611	0.34774	0.000536845	1.73026e-05	20.6682	0.35635	0.15872	0.16053	0.04064	2.82647e-05
																						Mean155	60.2984	0.32052	0.000216151	3.02825e-06	64.9464	0.3945	1.04407	1.05598	0.04065	2.82668e-05
																						Mean174	49.4555	0.68838	0.000220431	5.64507e-06	49.5523	0.84125	0.23107	0.23371	0.04065	2.82707e-05
																						Mean193	21.822	0.33473	0.00049495	1.33578e-05	25.0058	0.34433	0.32016	0.32381	0.04067	2.828e-05
																						Mean197	39.3665	0.40812	0.0003773	6.55845e-06	40.5548	0.43695	0.2329	0.23556	0.04067	2.82845e-05
																						Mean224	21.2058	0.30456	0.000405217	1.10137e-05	22.0704	0.31724	0.18351	0.18561	0.04068	2.82922e-05
																						Mean228	70.8085	0.86157	0.000386253	5.47289e-06	72.9204	0.91174	0.92722	0.93779	0.04069	2.8296e-05
																						Mean236	27.6037	0.54773	0.000900644	2.54486e-05	29.3314	0.55589	0.41053	0.41521	0.04072	2.83137e-05
																						Mean242	34.1345	0.31109	0.000140099	3.90802e-06	35.763	0.22904	0.60184	0.6087	0.04072	2.83164e-05
																						Mean283	22.4478	0.32435	0.000462957	1.20238e-05	25.093	0.33488	0.19779	0.20005	0.04073	2.83248e-05
																						Mean291	14.9467	0.29481	0.000378265	1.45758e-05	16.4027	0.30875	0.16079	0.16263	0.04075	2.83349e-05
																						Mean294	28.9449	0.26218	0.000293155	6.03317e-06	31.2488	0.281	0.364	0.36815	0.04075	2.83391e-05
																						Mean310	42.3115	0.27339	0.000215025	3.88033e-06	44.5753	0.32205	1.24961	1.26387	0.04076	2.83418e-05
																						Mean325	15.8074	0.31987	0.000449519	1.65199e-05	19.3269	0.33085	0.24546	0.24826	0.04077	2.83533e-05
																						Mean332	12.3895	0.40383	0.000741578	3.91481e-05	14.1909	0.40962	0.11193	0.1132	0.04081	2.83805e-05
																						Mean374	38.3859	0.6001	0.00051369	1.0581e-05	39.6437	0.62359	0.30075	0.30419	0.04082	2.83879e-05
																						Mean385	56.6545	0.59226	9.91772e-05	2.46696e-06	48.0962	0.21517	0.85991	0.86972	0.04082	2.83896e-05
																						Mean393	7.70504	0.30399	0.000403617	3.01879e-05	9.66459	0.31674	0.11489	0.1162	0.04085	2.84106e-05
																						Mean407	14.5063	0.31684	0.000440548	1.7605e-05	15.7493	0.32813	0.16259	0.16444	0.04087	2.84228e-05
																						Mean429	55.9724	0.50614	0.000525569	6.80184e-06	62.3459	0.52516	1.44629	1.46279	0.04088	2.84276e-05
																						Mean434	32.4351	0.23731	0.000199211	4.36373e-06	35.2484	0.24923	0.7113	0.71942	0.04088	2.84306e-05
																						Mean435	24.7802	0.25952	0.000286307	6.92608e-06	26.119	0.27872	0.27062	0.2737	0.04089	2.84354e-05
																						Mean436	42.5559	0.46648	0.00102	1.76076e-05	44.8855	0.47057	0.37561	0.37989	0.04091	2.84477e-05
																						Mean449	24.2692	0.32167	0.00045487	1.0903e-05	26.5117	0.33246	0.17042	0.17236	0.04092	2.84552e-05
																						Mean458	164.105	2.29762	0.000286256	3.61241e-06	165.084	2.44476	0.4332	0.43814	0.04092	2.84578e-05
																						Mean473	57.1913	0.26958	0.000312078	3.20538e-06	57.8292	0.28728	1.31798	1.33302	0.04093	2.846e-05
																						Mean488	46.9576	0.25267	0.000268291	3.49524e-06	51.0098	0.27268	1.0734	1.08564	0.04093	2.84624e-05
																						Mean512	35.0565	0.35054	0.000129986	3.81316e-06	35.3997	0.2256	0.57273	0.57926	0.04093	2.84651e-05
																						Mean554	20.8137	0.24821	0.000173781	6.55202e-06	24.5017	0.24054	0.44371	0.44878	0.04094	2.84696e-05
																						Mean557	39.6161	0.38753	0.000677847	1.08793e-05	45.9322	0.39395	0.73539	0.74378	0.04095	2.84772e-05
																						Mean569	24.2299	0.40906	0.000762776	2.07817e-05	29.4246	0.41467	0.5145	0.52037	0.04097	2.84916e-05
																						Mean575	50.899	0.31332	0.000139427	2.62082e-06	48.7457	0.22881	0.86767	0.87757	0.04097	2.84935e-05
																						Mean603	14.3198	0.29543	0.000379942	1.52803e-05	15.4664	0.30928	0.17456	0.17655	0.04099	2.85041e-05
																						Mean606	32.0888	0.35453	0.00029925	6.52715e-06	34.0358	0.3949	0.51916	0.52508	0.041	2.85086e-05
[truncated: 6 more columns]

## Sheet: Figure 6
Figure 6b (exemplary fluorescence trace (fluorescence traces normalized))						Figure 6c					Figure 6e (exemplary accumulation fluorescence trace (fluorescence traces normalized))						Figure 6f (histogram data(fit parameter linear fit))
																	each row are the linear fit parameters of the fluorescence intensity of EGFP. n is the summary of monoexponential decays of single cavities.
																														Figure 6f
	GFP	Rhodamine B dextran 70 kDa										Rhodamine B dextran 70 kDa	GFP				Series	a	a err	b	b err	Chi2	Chi2 err							interval meanpoint	interval endpoint	count	cumulative count
time (min)	fluorescence intensity normalized	fluorescence intensity normalized					counts per condition	percentage (%)	sum		time (s)	fluorescence intensity normalized	fluorescence intensity normalized				Mean6	0.00118	0.000552495	2.17769	0.50709	0.02062	0.02085							0.0001	0.0002	2	2
0	1.01314	1.05129				rupture	329	15.2174	15.2174		0	0.86076	0.53398				Mean15	0.00136	0.000552495	3.07097	0.50709	0.01444	0.01461							0.0003	0.0004	0	2
0.58333	1.08758	0.95407				GFP effluxes (DNA funnel)	16	0.74006	15.9574		120	0.96356	0.30263				Mean17	0.0026	0.000552495	2.74894	0.50709	0.0298	0.03014							0.0005	0.0006	0	2
1.16667	1.0615	0.89151				bad control	51	2.35893	18.3164		240	1.07668	0.5561				Mean24	0.00205	0.000552495	1.79686	0.50709	0.04068	0.04115							0.0007	0.0008	2	4
1.75	1.1176	0.87881				complex kinetics	213	9.85199	28.1684		360	0.95108	0.56594				Mean42	0.000877564	0.000552495	2.13586	0.50709	0.03147	0.03183							0.0009	0.001	5	9
2.33333	1.07791	0.95175				no signal changes	1553	71.8316	100		480	1.0003	0.71607				Mean48	0.00215	0.000552495	2.2812	0.50709	0.02365	0.02392							0.0011	0.0012	7	16
2.91667	1.03348	1.00504									600	1.01644	0.62257				Mean49	0.000988645	0.000552495	2.25014	0.50709	0.01219	0.01233							0.0013	0.0014	8	24
3.5	1.20939	1.00272									720	1.12366	0.61519				Mean56	0.00278	0.000552495	3.48743	0.50709	0.06246	0.06318							0.0015	0.0016	23	47
4.08333	1.12534	0.90661									840	0.93198	0.73082				Mean60	0.00229	0.000552495	4.51509	0.50709	0.03246	0.03284							0.0017	0.0018	25	72
4.66667	1.09632	0.96214									960	1.01277	0.70624				Mean61	0.0019	0.000552495	2.19017	0.50709	0.04383	0.04434							0.0019	0.002	29	101
5.25	1.07311	0.90661									1080	0.95989	0.8489				Mean64	0.00162	0.000552495	2.93363	0.50709	0.03512	0.03552							0.0021	0.0022	23	124
5.83333	1.16009	0.88344									1200	1.01057	0.80711				Mean67	0.00254	0.000552495	2.64174	0.50709	0.04126	0.04174							0.0023	0.0024	22	146
6.41667	1.05183	0.95295									1320	1.04508	0.89816				Mean69	0.00172	0.000552495	2.40569	0.50709	0.01917	0.01939							0.0025	0.0026	17	163
7	1.10212	1.00616									1440	1.18244	0.89816				Mean88	0.00251	0.000552495	1.71771	0.50709	0.03293	0.03331							0.0027	0.0028	10	173
7.58333	1.10793	0.92978									1560	1.09722	1.01379				Mean90	0.00162	0.000552495	2.0194	0.50709	0.02058	0.02082							0.0029	0.003	12	185
8.16667	0.71736	0.89734									1680	1.0194	0.94978				Mean94	0.00239	0.000552495	2.33043	0.50709	0.03638	0.0368							0.0031	0.0032	5	190
8.75	1.24714	1.01311									1800	1.03847	1.0655				Mean103	0.00243	0.000552495	1.94354	0.50709	0.01599	0.01617							0.0033	0.0034	8	198
9.33333	0.9571	0.99689									1920	0.95989	0.9252				Mean124	0.00288	0.000552495	1.87234	0.50709	0.03553	0.03594							0.0035	0.0036	2	200
9.91667	1.05283	1.04898									2040	1.0179	0.94241				Mean138	0.00249	0.000552495	2.34297	0.50709	0.01351	0.01366							0.0037	0.0038	4	204
10.5	0.8904	1.1474									2160	1.10899	0.9892				Mean141	0.00206	0.000552495	2.6578	0.50709	0.02509	0.02538							0.0039	0.004	1	205
11.0833	0.78113	1.07103									2280	1.02894	0.98675				Mean143	0.00206	0.000552495	3.06389	0.50709	0.03115	0.03151							0.0041	0.0042	1	206
11.6667	1.06443	1.02589									2400	0.96062	1.20079				Mean147	0.00253	0.000552495	2.9668	0.50709	0.01282	0.01297							0.0043	0.0044	0	206
12.25	0.87005	1.00847									2520	1.06785	0.83661				Mean160	0.00196	0.000552495	2.29517	0.50709	0.02483	0.02512							0.0045	0.0046	0	206
12.8333	1.06824	1.11505									2640	1.03847	0.94732				Mean167	0.00175	0.000552495	3.1218	0.50709	0.02222	0.02247							0.0047	0.0048	1	207
13.4167	1.24908	1.00504									2760	1.1303	1.1418				Mean178	0.00147	0.000552495	2.84723	0.50709	0.03311	0.03349							0.0049	0.005	0	207
14	1.21039	0.95295									2880	1.10679	1.03837				Mean184	0.00284	0.000552495	3.50026	0.50709	0.05169	0.05228							0.0051	0.0052	1	208
14.5833	0.97064	0.97372									3000	1.02453	1.05321				Mean197	0.00328	0.000552495	4.25406	0.50709	0.02769	0.02801							0.0053	0.0054	0	208
15.1667	1.03828	1.17177									3120	0.91144	1.15655				Mean202	0.0009963	0.000552495	2.97389	0.50709	0.0342	0.03459							0.0055	0.0056	0	208
15.75	1.11373	0.99457									3240	1.00176	1.08271				Mean204	0.00207	0.000552495	2.69151	0.50709	0.03797	0.0384							0.0057	0.0058	0	208
16.3333	1.09052	1.08141									3360	1.07375	1.06058				Mean214	0.00191	0.000552495	3.2342	0.50709	0.03118	0.03154							0.0059	0.006	0	208
16.9167	0.97738	1.14045									3480	0.93712	1.02854				Mean215	0.00156	0.000552495	2.95429	0.50709	0.02027	0.0205							0.0061	0.0062	0	208
17.5	1.16009	1.13007									3600	0.92391	1.13934				Mean218	0.00477	0.000552495	6.20474	0.50709	0.03621	0.03662							0.0063	0.0064	0	208
18.0833	0.94836	0.94712									3720	0.94375	1.10237				Mean221	0.00116	0.000552495	3.21091	0.50709	0.02647	0.02678							0.0065	0.0066	0	208
18.6667	0.75598	1.15787									3840	1.02013	1.0187				Mean226	0.0016	0.000552495	2.32826	0.50709	0.01918	0.0194							0.0067	0.0068	0	208
19.25	1.14175	1.09531									3960	0.95182	1.18604				Mean228	0.00182	0.000552495	3.50429	0.50709	0.04439	0.0449							0.0069	0.007	0	208
19.8333	0.93482	1.06176									4080	0.92538	1.13187				Mean230	0.0017	0.000552495	1.84709	0.50709	0.0136	0.01376							0.0071	0.0072	0	208
20.4167	1.18237	1.0942									4200	1.04731	1.27217				Mean243	0.00303	0.000552495	3.15534	0.50709	0.03375	0.03414							0.0073	0.0074	0	208
21	1.22393	1.02357									4320	1.05318	1.15163				Mean244	0.00152	0.000552495	2.09634	0.50709	0.01895	0.01917							0.0075	0.0076	0	208
21.5833	1.04896	1.14397									4440	0.98559	1.06796				Mean256	0.00294	0.000552495	3.61674	0.50709	0.04306	0.04356							0.0077	0.0078	0	208
22.1667	0.74151	1.06408									4560	0.97679	1.13934				Mean257	0.00181	0.000552495	2.18611	0.50709	0.02874	0.02907							0.0079	0.008	0	208
22.75	0.88166	1.03516									4680	0.93271	1.13187				Mean259	0.00148	0.000552495	2.97506	0.50709	0.03514	0.03554							0.0081	0.0082	0	208
23.3333	0.82462	1.11385									4800	0.93345	1.23284				Mean274	0.00272	0.000552495	3.6602	0.50709	0.05807	0.05874							0.0083	0.0084	0	208
23.9167	0.81208	1.02932									4920	1.01864	1.02608				Mean278	0.00233	0.000552495	2.45246	0.50709	0.01882	0.01904							0.0085	0.0086	0	208
24.5	0.91555	1.00847									5040	1.01864	1.26234				Mean295	0.00126	0.000552495	2.63474	0.50709	0.02502	0.02531							0.0087	0.0088	0	208
25.0833	1.12147	1.00967									5160	1.06051	1.05813				Mean303	0.00374	0.000552495	4.78451	0.50709	0.04771	0.04826							0.0089	0.009	0	208
25.6667	1.03542	1.06056									5280	1.03774	1.1245				Mean308	0.00191	0.000552495	2.82329	0.50709	0.02143	0.02167							0.0091	0.0092	0	208
26.25	1.04602	1.0803									5400	1.11413	0.9892				Mean319	0.00231	0.000552495	4.5758	0.50709	0.0452	0.04572							0.0093	0.0094	0	208
26.8333	1.00346	1.17409									5520	1.00323	1.17375				Mean320	0.00214	0.000552495	2.96757	0.50709	0.02512	0.0254							0.0095	0.0096	0	208
27.4167	0.9513	1.02589									5640	1.0304	1.12696				Mean327	0.00222	0.000552495	3.4262	0.50709	0.0195	0.01972							0.0097	0.0098	0	208
28	0.77339	1.0791									5760	0.88573	1.10729				Mean337	0.00416	0.000552495	4.63143	0.50709	0.02848	0.0288							0.0099	0.01	0	208
28.5833	0.94256	1.1335									5880	1.16187	1.18359				Mean338	0.00275	0.000552495	3.45271	0.50709	0.03443	0.03483							0.0101	0.0102	0	208
29.1667	0.95417	1.06176									6000	1.06418	1.31396				Mean341	0.00118	0.000552495	3.2102	0.50709	0.02013	0.02036							0.0103	0.0104	0	208
29.75	0.87779	0.97492									6120	1.0157	0.99658				Mean352	0.00174	0.000552495	4.81843	0.50709	0.04466	0.04518							0.0105	0.0106	0	208
30.3333	0.98612	0.92163									6240	1.03114	1.00395				Mean369	0.000719707	0.000552495	3.8672	0.50709	0.04264	0.04313							0.0107	0.0108	0	208
30.9167	1.26836	0.90078									6360	0.99146	1.16638				Mean371	0.00156	0.000552495	1.7782	0.50709	0.01001	0.01013							0.0109	0.011	0	208
31.5	0.96678	1.07334									6480	1.01277	0.99658				Mean380	0.00193	0.000552495	2.84714	0.50709	0.04655	0.04708							0.0111	0.0112	0	208
32.0833	0.8952	0.94248									6600	1.03407	0.93503				Mean382	0.0024	0.000552495	2.92197	0.50709	0.05557	0.05621							0.0113	0.0114	0	208
32.6667	1.09825	1.03859									6720	1.02894	1.05075				Mean386	0.00172	0.000552495	2.95751	0.50709	0.03069	0.03104							0.0115	0.0116	0	208
33.25	0.93102	1.02237									6840	0.91731	1.10237				Mean390	0.00145	0.000552495	4.77854	0.50709	0.03947	0.03992							0.0117	0.0118	0	208
33.8333	1.09632	0.93553									6960	1.05758	1.06796				Mean391	0.00232	0.000552495	3.4748	0.50709	0.02919	0.02953							0.0119	0.012	0	208
34.4167	1.21232	1.03052									7080	1.01424	1.10975				Mean392	-0.000247106	0.000552495	3.46117	0.50709	0.01709	0.01729							0.0121	0.0122	0	208
35	1.07017	0.98994									7200	1.03921	0.97691				Mean397	0.00161	0.000552495	2.27391	0.50709	0.03965	0.04011							0.0123	0.0124	0	208
35.5833	1.04896	1.05713									7320	0.98926	0.93749				Mean398	0.000927747	0.000552495	1.82843	0.50709	0.02189	0.02215							0.0125	0.0126	0	208
36.1667	0.92228	1.04554									7440	0.92024	1.05321				Mean407	0.0012	0.000552495	3.09649	0.50709	0.01327	0.01342							0.0127	0.0128	0	208
36.75	1.13307	0.99225									7560	1.02087	1.18604				Mean412	0.00136	0.000552495	3.87729	0.50709	0.02942	0.02976							0.0129	0.013	0	208
37.3333	1.19104	1.05129									7680	0.92831	1.2353				Mean416	0.00143	0.000552495	4.51426	0.50709	0.03294	0.03332							0.0131	0.0132	0	208
37.9167	0.94937	0.93785									7800	1.06345	0.8489				Mean417	0.000120238	0.000552495	3.34429	0.50709	0.01555	0.01573							0.0133	0.0134	0	208
38.5	1.03635	0.96909									7920	0.95182	1.09254				Mean425	0.00204	0.000552495	2.88723	0.50709	0.0249	0.02518							0.0135	0.0136	0	208
39.0833	1.19785	0.95758									8040	1.04951	1.1885				Mean433	0.00186	0.000552495	5.9198	0.50709	0.0617	0.06241							0.0137	0.0138	0	208
39.6667	1.02574	1.04323									8160	0.88573	0.9547				Mean436	0.00209	0.000552495	3.58243	0.50709	0.04306	0.04355							0.0139	0.014	0	208
40.25	0.92615	1.03052									8280	1.03334	1.0187				Mean449	0.00282	0.000552495	3.87829	0.50709	0.02113	0.02137							0.0141	0.0142	0	208
40.8333	0.89813	1.07334									8400	1.04068	0.97937				Mean450	0.00282	0.000552495	3.80483	0.50709	0.05994	0.06063							0.0143	0.0144	0	208
41.4167	1.14755	1.00847									8520	0.94301	1.13433				Mean451	0.00316	0.000552495	3.54431	0.50709	0.02688	0.02719							0.0145	0.0146	0	208
42	1.07017	1.03859									8640	1.14203	1.00395				Mean454	0.00148	0.000552495	2.59829	0.50709	0.03774	0.03817							0.0147	0.0148	0	208
42.5833	1.12921	1.09188									8760	1.0091	1.17375				Mean456	0.00202	0.000552495	2.93974	0.50709	0.03642	0.03684							0.0149	0.015	0	208
43.1667	1.26549	1.07798									8880	1.05464	1.09746				Mean459	0.00275	0.000552495	3.63237	0.50709	0.02246	0.02271							0.0151	0.0152	0	208
43.75	0.95417	1.17984									9000	0.91437	0.96954				Mean472	0.00227	0.000552495	2.44949	0.50709	0.02093	0.02117							0.0153	0.0154	0	208
44.3333	1.07017	1.11617									9120	1.10972	0.93995				Mean480	0.00323	0.000552495	4.23077	0.50709	0.01973	0.01996							0.0155	0.0156	0	208
44.9167	1.21519	1.03971									9240	1.0194	0.89324				Mean489	0.0037	0.000552495	3.08194	0.50709	0.05766	0.05832							0.0157	0.0158	0	208
45.5	1.16496	1.09068									9360	0.97092	1.04329				Mean492	0.00146	0.000552495	2.91191	0.50709	0.04	0.04046							0.0159	0.016	0	208
46.0833	0.96964	1.11848									9480	0.98926	1.11221				Mean496	0.00217	0.000552495	4.69606	0.50709	0.04313	0.04362							0.0161	0.0162	0	208
46.6667	1.14461	1.10458									9600	0.99296	1.2353				Mean508	0.00278	0.000552495	2.70729	0.50709	0.02903	0.02937							0.0163	0.0164	0	208
47.25	1.11953	1.12312									9720	0.95182	0.88095				Mean511	0.00251	0.000552495	2.6208	0.50709	0.0604	0.06109							0.0165	0.0166	0	208
47.8333	1.09532	1.05249									9840	0.97092	1.095				Mean513	0.00136	0.000552495	2.75597	0.50709	0.01272	0.01287							0.0167	0.0168	0	208
48.4167	1.10793	1.1196									9960	0.92978	1.05321				Mean517	0.00141	0.000552495	2.91449	0.50709	0.04101	0.04148							0.0169	0.017	0	208
49	1.22873	1.14045									10080	0.97312	1.14671				Mean524	0.00191	0.000552495	3.244	0.50709	0.06509	0.06584							0.0171	0.0172	0	208
49.5833	1.0006	1.12424									10200	0.99663	1.09746				Mean529	0.0021	0.000552495	2.36994	0.50709	0.03028	0.03063							0.0173	0.0174	0	208
50.1667	0.93296	1.15435									10320	1.11119	1.16638				Mean547	0.00174	0.000552495	2.66174	0.50709	0.04076	0.04123							0.0175	0.0176	0	208
50.75	1.10306	1.23081									10440	0.8916	1.218				Mean548	0.00186	0.000552495	2.38689	0.50709	0.0232	0.02346							0.0177	0.0178	0	208
51.3333	1.07791	1.16945									10560	0.93051	0.94978				Mean551	0.00282	0.000552495	4.00997	0.50709	0.03812	0.03856							0.0179	0.018	0	208
51.9167	1.01607	1.1196									10680	0.96136	1.04574				Mean552	0.00257	0.000552495	4.90277	0.50709	0.0527	0.05331							0.0181	0.0182	0	208
52.5	1.05763	1.12887									10800	0.91877	1.06304				Mean553	0.00167	0.000552495	4.4196	0.50709	0.04426	0.04477							0.0183	0.0184	0	208
53.0833	0.99773	1.05129									10920	1.00396	1.09746				Mean566	0.0019	0.000552495	2.78149	0.50709	0.07841	0.07932							0.0185	0.0186	0	208
53.6667	0.92228	1.13007									11040	0.90921	1.04829				Mean571	0.00182	0.000552495	2.87254	0.50709	0.02113	0.02138							0.0187	0.0188	0	208
54.25	1.0054	1.1069									11160	0.93345	1.04083				Mean585	0.00148	0.000552495	2.733	0.50709	0.01527	0.01545							0.0189	0.019	0	208
54.8333	1.16589	1.20181									11280	0.99516	0.8612				Mean586	0.00235	0.000552495	2.50514	0.50709	0.02622	0.02652							0.0191	0.0192	0	208
55.4167	1.14175	1.18679									11400	1.0091	0.99658				Mean606	0.00156	0.000552495	3.6816	0.50709	0.04649	0.04703							0.0193	0.0194	0	208
56	1.19591	1.0942									11520	0.99369	1.00887				Mean614	0.00271	0.000552495	3.46571	0.50709	0.03846	0.0389							0.0195	0.0196	0	208
56.5833	1.0615	1.17984									11640	0.87983	1.07042				Mean623	0.00148	0.000552495	4.72366	0.50709	0.07065	0.07147							0.0197	0.0198	0	208
57.1667	1.03542	1.24351									11760	0.89087	0.9252				Mean628	0.00329	0.000552495	3.14783	0.50709	0.03419	0.03459							0.0199	0.02	0	208
57.75	1.13981	1.2702									11880	1.09282	0.91783				Mean634	0.00134	0.000552495	2.46863	0.50709	0.03134	0.0317
58.3333	1.17076	1.24008									12000	1.03627	1.01625				Mean635	0.00176	0.000552495	4.5942	0.50709	0.04786	0.04841
58.9167	0.9503	1.27132									12120	1.12956	0.93749				Mean640	0.00213	0.000552495	2.78277	0.50709	0.02446	0.02475
59.5	1.26936	1.19374									12240	0.90261	0.9892				Mean643	0.00148	0.000552495	2.83537	0.50709	0.01634	0.01653
60.0833	1.13881	1.1486									12360	1.0157	0.98183				Mean659	0.00256	0.000552495	2.60371	0.50709	0.02509	0.02538
60.6667	0.82656	1.24008									12480	1.0282	0.91537				Mean661	0.00174	0.000552495	2.59231	0.50709	0.01146	0.01159
61.25	1.14562	1.22961									12600	1.026	1.03099				Mean663	0.00325	0.000552495	2.647	0.50709	0.02937	0.0297
61.8333	0.89813	1.19726									12720	1.00323	1.07288				Mean664	0.00193	0.000552495	2.36969	0.50709	0.04646	0.047
62.4167	1.14075	1.11617									12840	1.01424	0.97691				Mean668	0.00159	0.000552495	2.99306	0.50709	0.02968	0.03002
[truncated: 152 more rows]

## Sheet: Supp Fig 7
Low Conductance state		High Conductance state
[truncated: 84 more rows]

## Sheet: Supp Fig 8
Trypsin conc.		Events per second
[truncated: 6 more rows]

[truncated: 5 more sheets: Supp Fig 10, Supp Fig 11, Supp Fig 14, Supp Fig 15, Supp Fig 17]
